# Supplementary material for: PIFA-mediated intramolecular N -arylation of 2-aminoquinoxalines to afford indolo[2,3- b ]quinoxaline derivatives
Source: Royal Society of Chemistry journal article supplement (doi:10.1039/d4ob00812j), 2024-01-01

*Electronic Supplementary Information*

**PIFA-mediated intramolecular *N*-arylation of 2-aminoquinoxalines to afford indolo[2,3-*b*]quinoxaline derivatives**

Subhashini V. Subramaniam<sup>a</sup>, Badal Singh<sup>a</sup>, Natarajan Pradeep<sup>a</sup>, and Saravanan Peruncheralathan\*<sup>a</sup>

*School of Chemical Sciences, National Institute of Science Education and Research (NISER) Bhubaneswar, an OCC of Homi Bhabha National Institute, Khurda – 752050, INDIA.*

*Email: [peru@niser.ac.in](mailto:peru@niser.ac.in)*

**Table of Contents**

|    |                                                                                                                                                                   |         |
|----|-------------------------------------------------------------------------------------------------------------------------------------------------------------------|---------|
| 1  | General Information                                                                                                                                               | ESI-2   |
| 2  | <b>Table S1:</b> Synthesis of 3-arylquinoxalin-2-amine <b>3</b>                                                                                                   | ESI-3   |
| 3  | <b>Table S2:</b> Synthesis of tosylated 3-arylquinoxalin-2-amine <b>4</b>                                                                                         | ESI-4   |
| 4  | Procedure for competitive reactions of <b>4a</b> and <b>4v</b> with toluene                                                                                       | ESI-4   |
| 5  | Crude spectra for competitive reaction of <b>4a</b> and <b>4v</b> with toluene ( <sup>1</sup> H NMR, ESI)                                                         | ESI-5   |
| 6  | General procedure for synthesis of 3-arylquinoxalin-2-amine <b>3</b>                                                                                              | ESI-9   |
| 7  | Procedure for synthesis of Suzuki coupling reaction of <b>5d</b> with phenyl boronic acid                                                                         | ESI-43  |
| 8  | General procedure for Detosylation of <b>5</b>                                                                                                                    | ESI-43  |
| 9  | Procedure for Chan-Lam coupling of <b>9a</b> with phenyl boronic acid                                                                                             | ESI-45  |
| 10 | Procedure for synthesis of target molecule 6,6'-(9-( <i>p</i> -tolyl)-9 <i>H</i> -carbazole-3,6-diyl)bis(6 <i>H</i> -indolo[2,3- <i>b</i> ]quinoxaline) <b>12</b> | ESI-46  |
| 11 | X-Ray structure and crystal data of <b>5a</b> and <b>6t</b>                                                                                                       | ESI-48  |
| 12 | References                                                                                                                                                        | ESI-52  |
| 13 | <sup>1</sup> H and <sup>13</sup> C Spectra copies                                                                                                                 | ESI-53  |
| 14 | Mass spectra copies                                                                                                                                               | ESI-112 |

## General information

All reactions were performed by using standard vial technique with rubber septum. All solids were weighed in air. Chemicals like *o*-phenylene diamine, substituted aryl aldehydes, sodium cyanide, 4Å molecular sieves, *p*-tosyl chloride, DMAP (*N,N*- dimethyl amino pyridine), PIDA (phenyliodine(III) diacetate), PIFA (phenyliodine bis(trifluoroacetate) were purchased from Aldrich, spectrochem, alfa aesar, TCI and used as such. Solvents like HFIP, TFE, MeOH, dioxane and pyridine were purchased from TCI and spectrochem and used without drying. Dried DMF, toluene, THF, DCM and DCE were used. All other reagents were purchased from common suppliers and used without further purification. Flash chromatography was performed using a Merck silica gel (230–400 mesh). Fractions were monitored by thin-layer chromatography (TLC) on precoated silica gel 60 F<sub>254</sub> plates (Merck & Co.) and were visualized by a UV light. Nuclear magnetic resonance (NMR) spectroscopy data were recorded using Bruker ARX 400 and 700 spectrometers. <sup>13</sup>C and <sup>1</sup>H NMR spectra were recorded in CDCl<sub>3</sub> and DMSO-d<sub>6</sub> referenced according to signal of deuterio solvent. Electrospray ionization high-resolution mass spectrometry (ESI HR-MS) measurements were performed using a Bruker micrOTOF-Q II mass-spectrometer and Waters Xevo-G2-XS QToF. The <sup>1</sup>H and <sup>13</sup>C spectra of the compounds **4** were recorded in various solvents such as CDCl<sub>3</sub>, DMSO-d<sub>6</sub>, methanol-d<sub>4</sub> and acetic acid-d<sub>4</sub>, to get a good shimming. However, the spectra of these solvents were not clear. Hence HRMS was used to characterize the compounds **4**. The corresponding mass spectra of the compounds **4** are attached below. The X-ray quality crystals for the compounds **5a** and **6t** were grown by slow diffusion of *n*-hexane over CH<sub>2</sub>Cl<sub>2</sub> solution. Single-crystal X-ray diffraction data was collected on a Rigaku SuperNova fine-focused dual diffractometer, with Cu Kα radiation ( $\lambda = 1.54178 \text{ \AA}$ ) or Mo-Kα radiation (0.71073 Å) equipped with a PILATUS200K detector.

**Table S1: Synthesis of 3-arylquinoxalin-2-amine 3**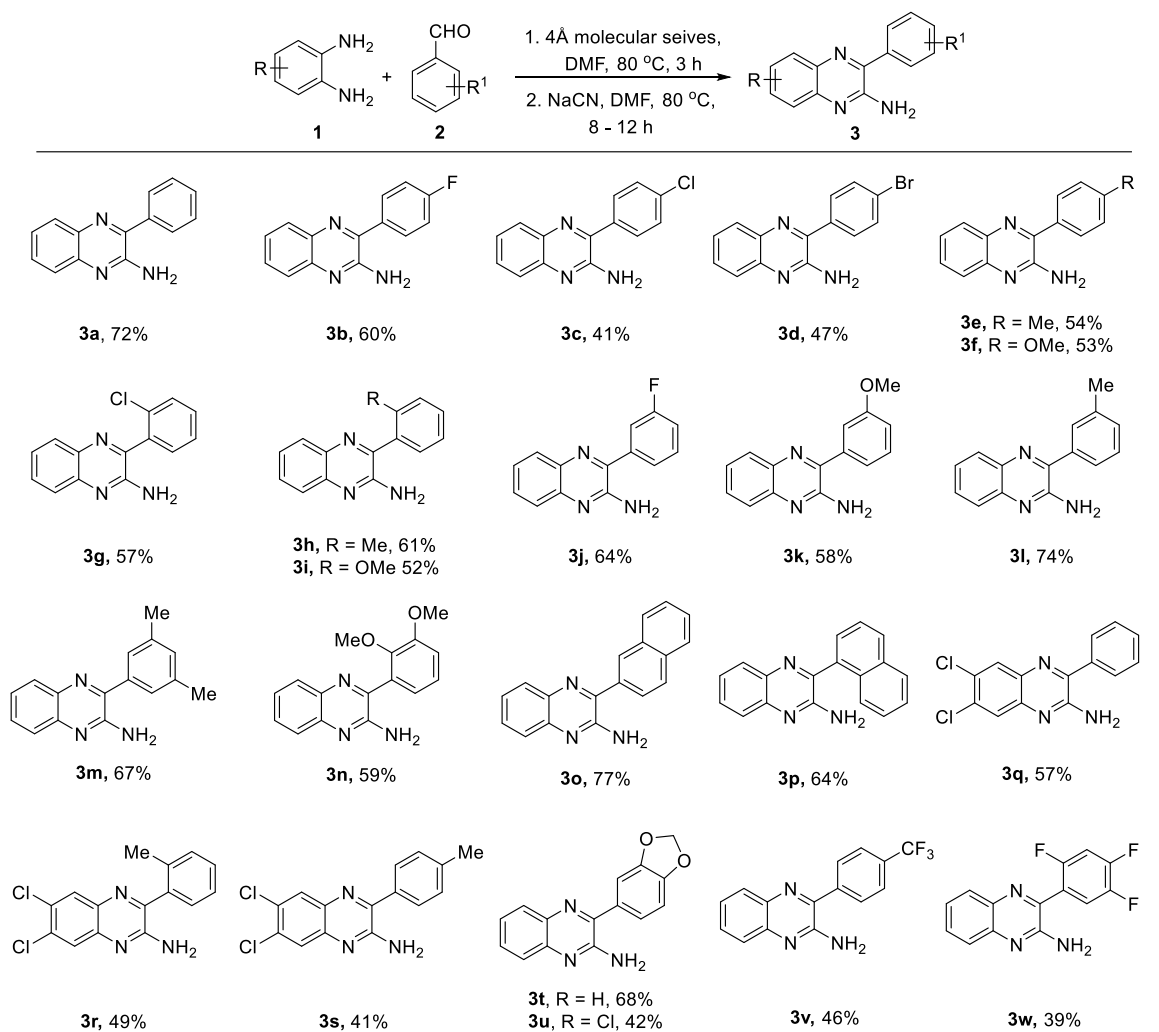

**Table S2: Synthesis of tosylated 3-arylquinoxalin-2-amine 4**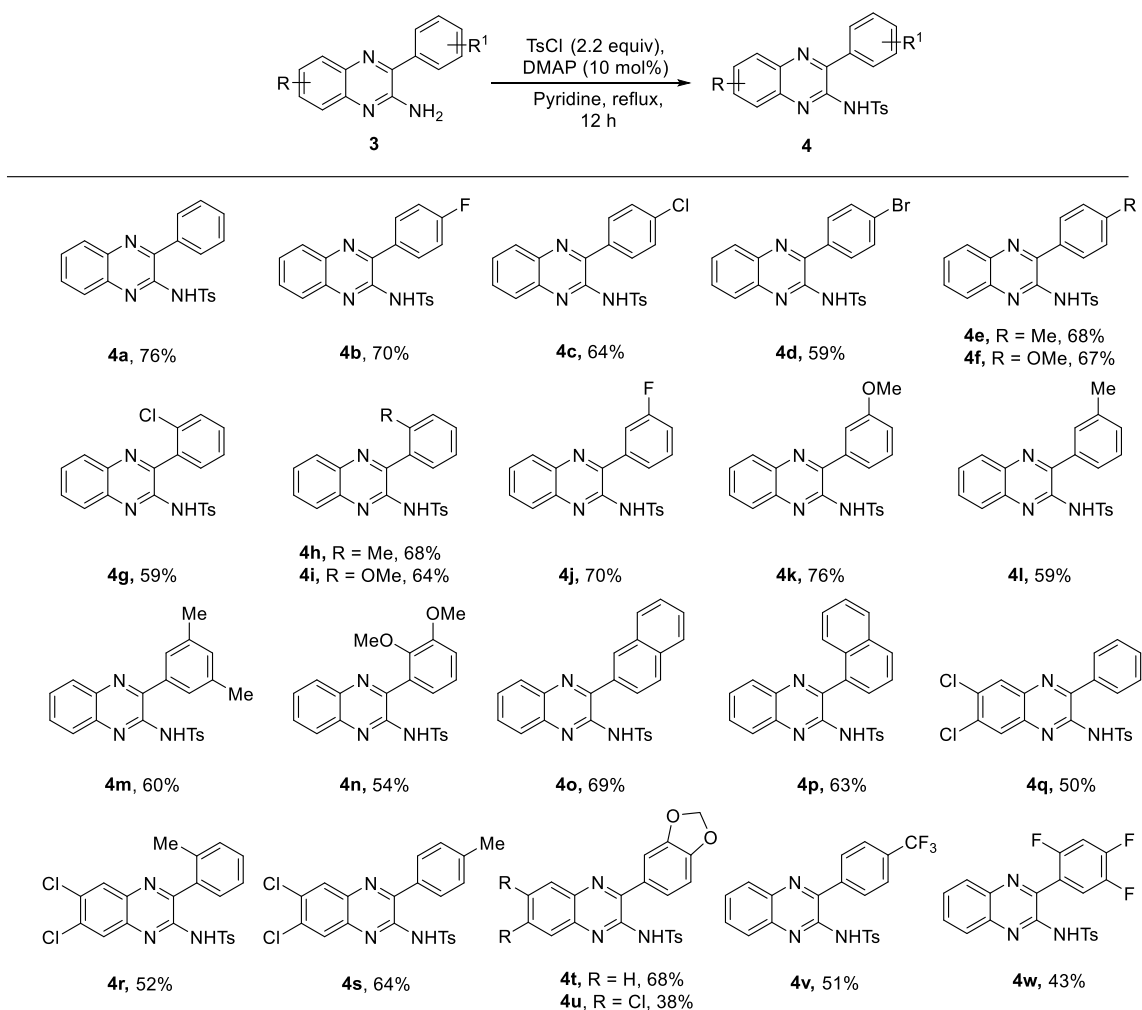**Procedure for competitive reactions of 4a and 4v with toluene:**

To an 8 mL vial, toluene (80  $\mu$ L, 1.5 equiv) along with HFIP (2mL) was taken, and the tosylated 3-arylquinoxalin-2-amine **4a** or **4v** (0.5 mmol) was added followed by PIFA (0.473 g, 2.2 equiv) and stirred at room temperature. After the completion of the starting material, the reaction mixture was added to water and extracted with EtOAc and the combined organic layers were dried over  $\text{Na}_2\text{SO}_4$  and concentrated.

## Crude $^1\text{H}$ NMR spectra (400 MHz, $\text{CDCl}_3$ ) for competitive reaction of 4a with toluene

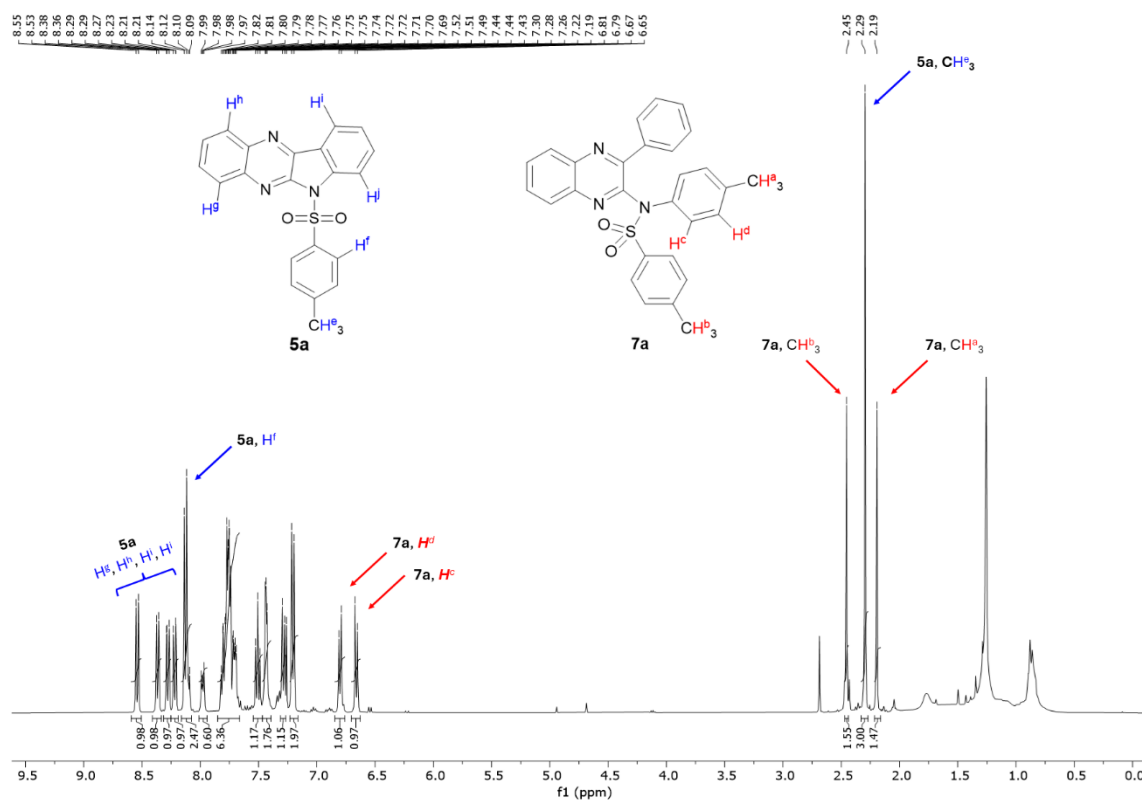

## Crude $^1\text{H}$ NMR spectra (400 MHz, $\text{CDCl}_3$ ) for competitive reaction of 4v with toluene

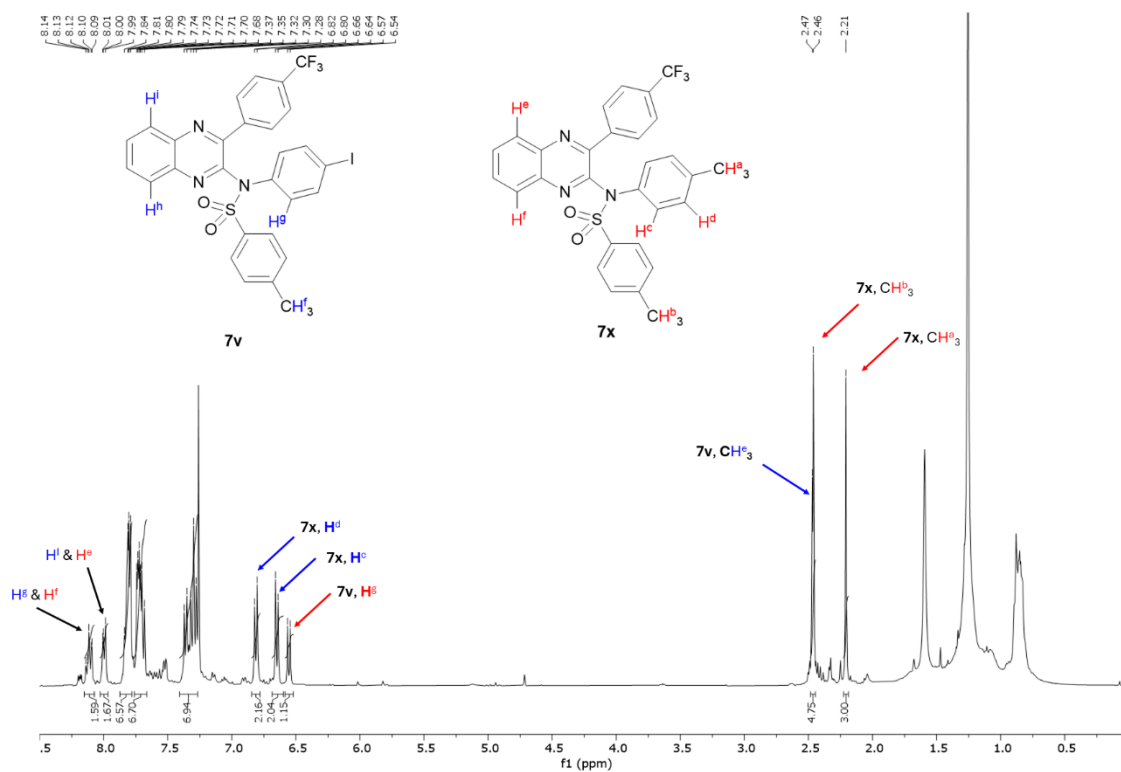

**Overlay of the crude  $^1\text{H}$  NMR spectra (400 MHz,  $\text{CDCl}_3$ ) from the competitive reaction of 4a with toluene and Isolated 5a**

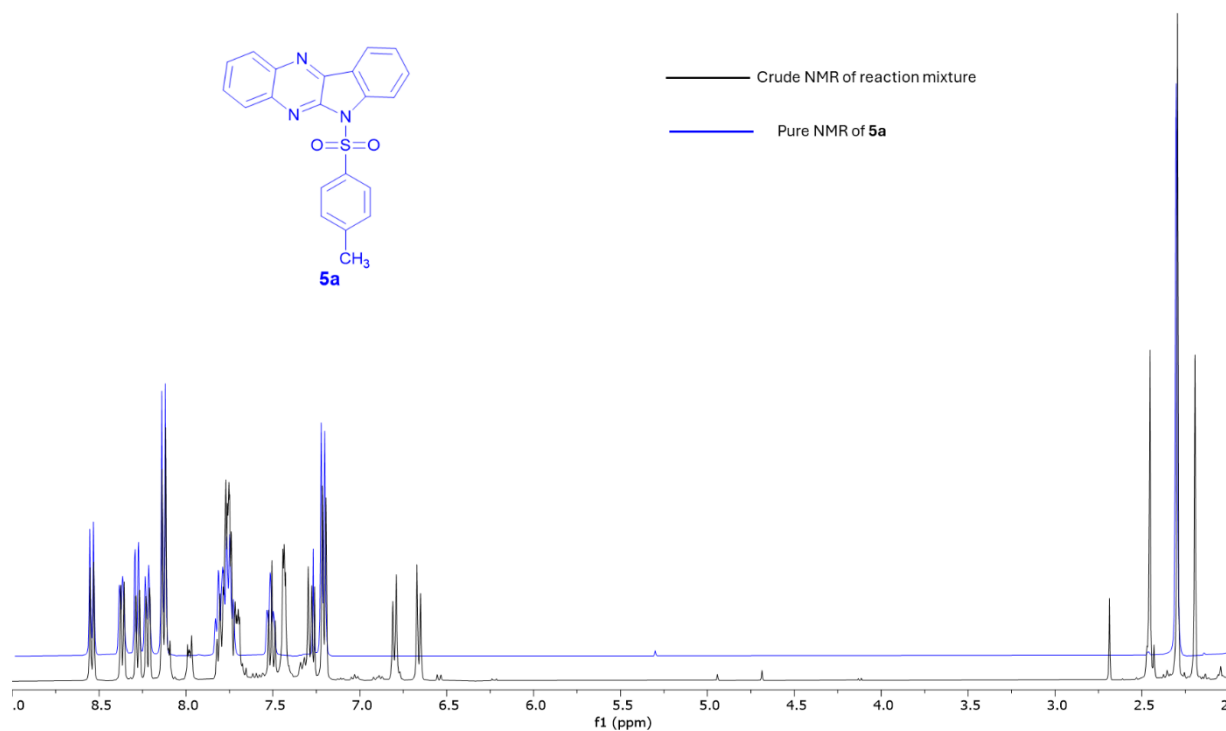

**Overlay of the crude  $^1\text{H}$  NMR spectra (400 MHz,  $\text{CDCl}_3$ ) from the competitive reaction of 4v with toluene and Isolated 7v**

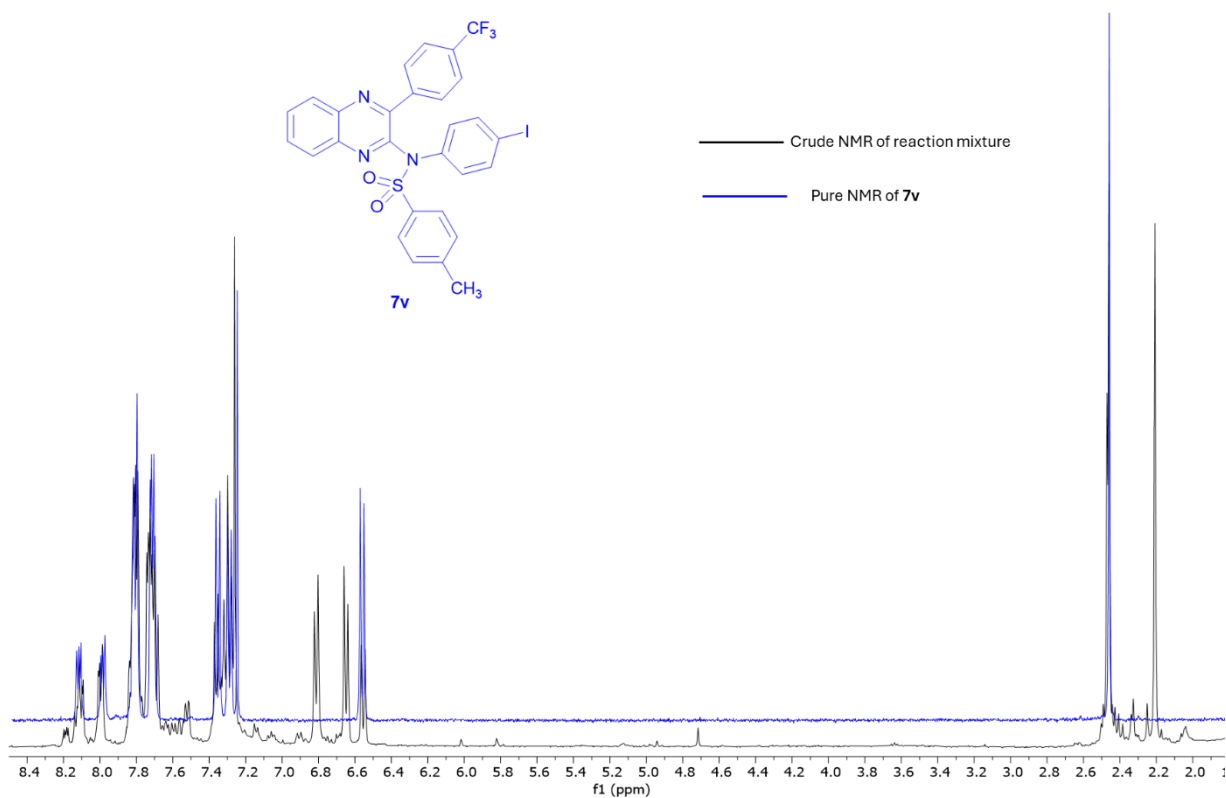

# ESI Mass spectra for competitive reaction of 4a with toluene

PERU\_VS\_1525

20-Jun-2024  
16:47:35

PERU\_20062024\_2 9 (0.209) Cm (7:9)

XEVO-G2XSQTOF#NotSet

1: TOF MS ES+  
3.63e6

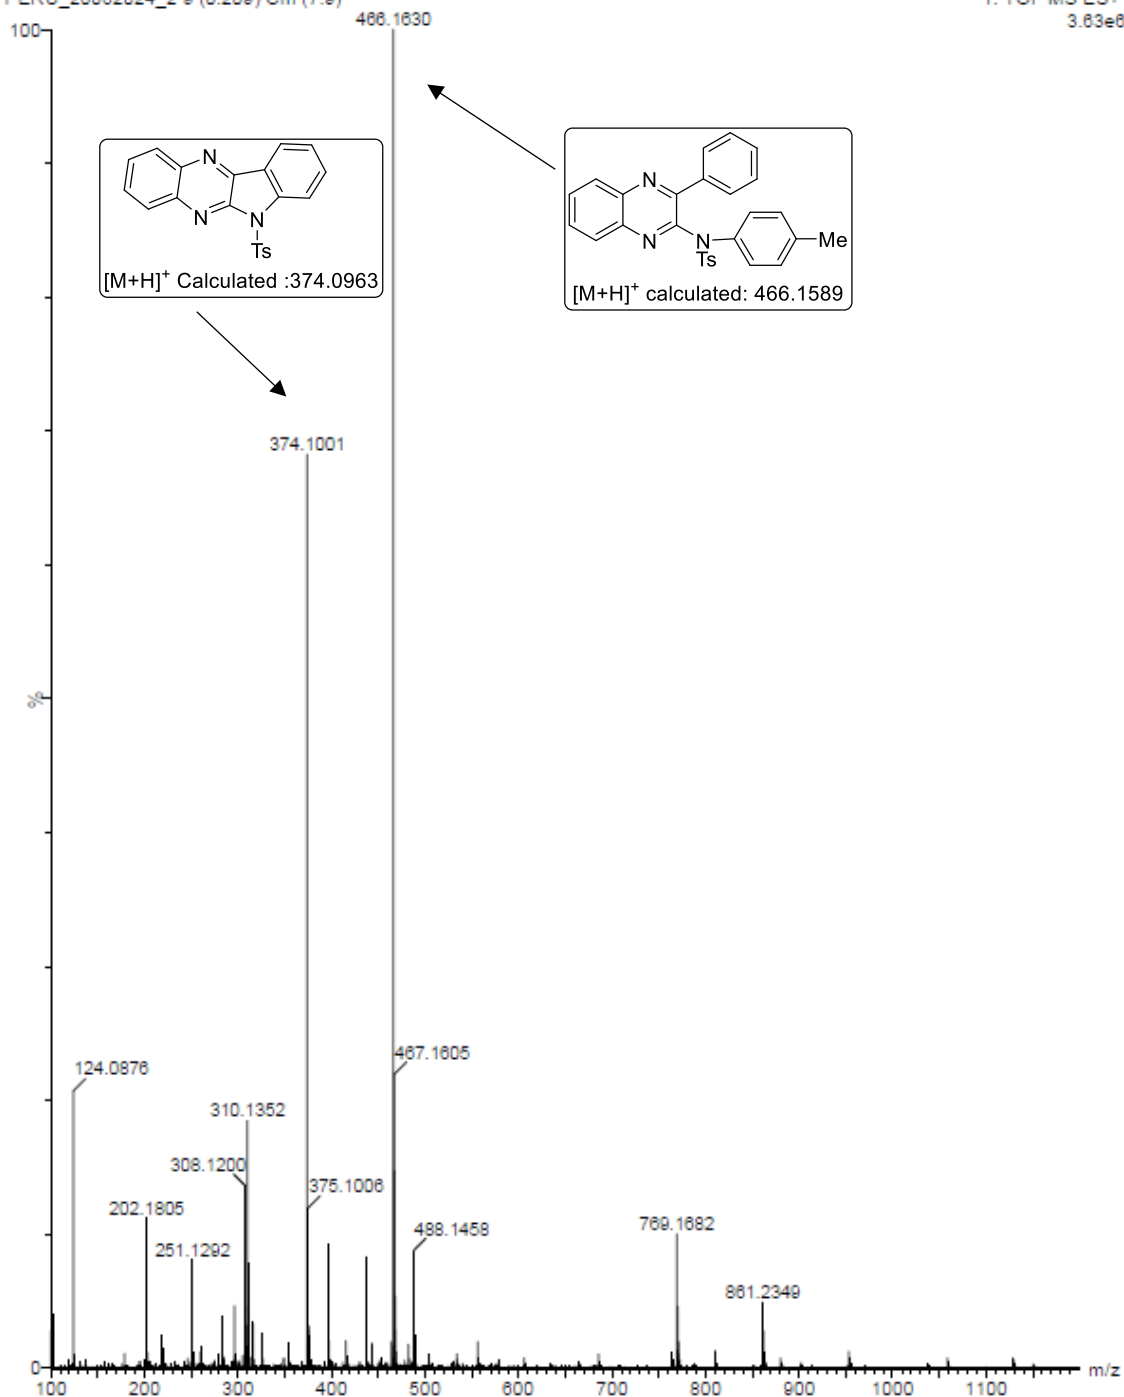

# ESI Mass spectra for competitive reaction of 4v with toluene

PERU\_VS\_1523

20-Jun-2024  
16:39:36

XEVO-G2XSQTOF#NotSet

PERU\_20062024\_1 49 (0.984) Cm (42:49)

1: TOF MS ES+  
5.28e8

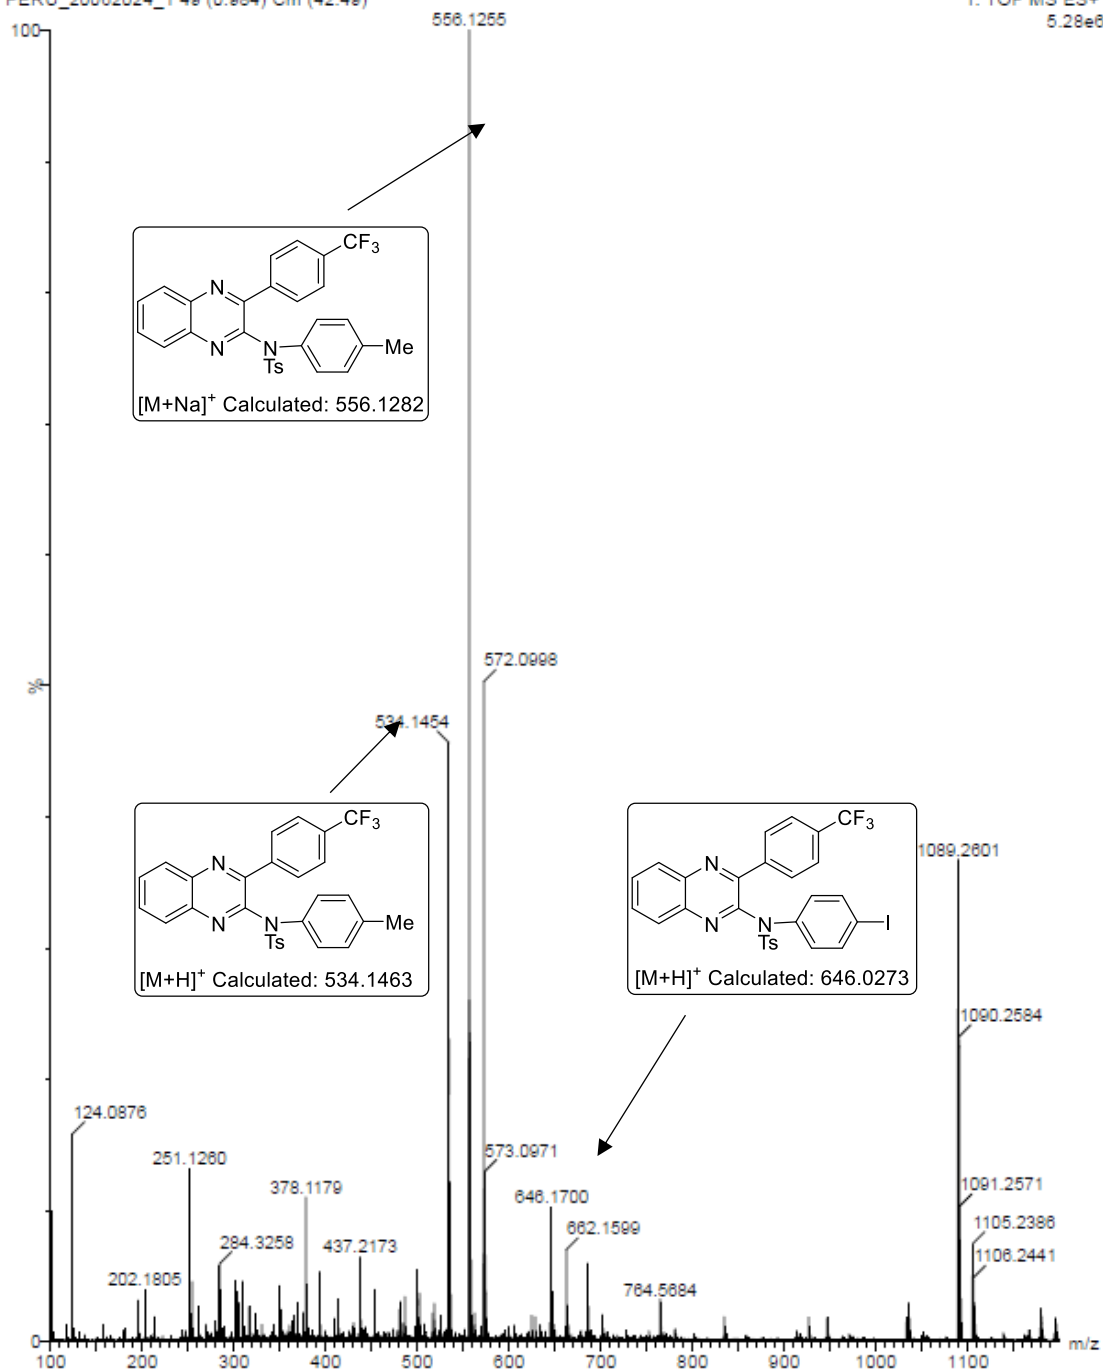



### General procedure for synthesis of 3-arylquinoxalin-2-amine 3<sup>1</sup>

Substituted 1,2-phenylenediamine **1** (5 mmol), aryl aldehyde **2** (5.5 mmol, 1.1 equiv) and the molecular sieves (0.25 g) were dissolved in dimethylformamide (20 mL). The reaction mixture was stirred at 80 °C in an open flask. The reaction was monitored by TLC. After the complete consumption of the reaction, NaCN (0.294, 5.5 mmol; 1.1 equiv) was added to the reaction mixture. After completion of the reaction, reaction mixture was cooled to room temperature, and poured into ice and extracted with EtOAc (3 x 200 mL). The combined organic layers were dried over Na<sub>2</sub>SO<sub>4</sub> and concentrated. The crude product was purified by column chromatography on silica using hexane and ethyl acetate as eluent.

### 3-Phenylquinoxalin-2-amine (3a)<sup>1</sup>

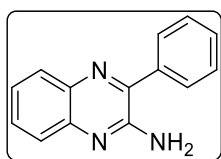

Reaction Time: 6 h; Yield: 72% (1.59 g); Nature of compound: Pale brown solid; Melting Point: 161 – 163 °C; R<sub>f</sub>: 0.19 in 30% ethyl acetate in hexanes; IR (KBr):  $\nu$  (cm<sup>-1</sup>) = 3464, 2894, 2107, 1665, 1223, 786. <sup>1</sup>H NMR (400 MHz, DMSO)  $\delta$  7.82 – 7.76 (m, 3H), 7.58 – 7.53 (m, 5H), 7.39 – 7.35 (m, 1H), 6.55 (s, 2H). <sup>13</sup>C{<sup>1</sup>H} NMR (100 MHz, DMSO)  $\delta$  151.9, 146.2, 141.8, 137.5, 137.3, 130.1, 129.8, 129.2, 128.9, 128.8, 125.5, 124.5. HRMS (ESI) *m/z*: [M+H]<sup>+</sup> Calcd for C<sub>14</sub>H<sub>12</sub>N<sub>3</sub> 222.1031; Found 222.1029

### 3-(4-Fluorophenyl)quinoxalin-2-amine (3b)<sup>2</sup>

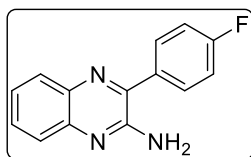

Reaction Time: 6 h; Yield: 60% (1.44 g); Nature of compound: Pale brown solid; Melting Point: 174 – 176 °C; R<sub>f</sub>: 0.19 in 30% ethyl acetate in hexanes; IR (KBr):  $\nu$  (cm<sup>-1</sup>) = 3445, 3005, 2078, 1635, 1230, 780. <sup>1</sup>H NMR (400 MHz, DMSO)  $\delta$  7.83 – 7.79 (m, 3H), 7.57 – 7.56 (m, 2H), 7.38 – 7.34 (m, 3H), 6.60 (s, 2H). <sup>13</sup>C{<sup>1</sup>H} NMR (100 MHz, DMSO)  $\delta$  163.1(d,  $J$  = 244.5 Hz), 151.9, 145.4, 141.8, 137.2, 133.9 (d,  $J$  = 3 Hz), 131.3 (d,  $J$  = 8.6 Hz), 130.1, 128.9, 125.5, 124.5, 116.1 (d,  $J$  = 21 Hz). <sup>19</sup>F NMR (377 MHz, DMSO)  $\delta$  -112.1. HRMS (ESI)  $m/z$ : [M+H]<sup>+</sup> Calcd for C<sub>14</sub>H<sub>11</sub>FN<sub>3</sub> 240.0932; Found 240.0956

### 3-(4-Chlorophenyl)quinoxalin-2-amine (3c)<sup>1</sup>

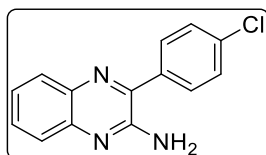

Reaction Time: 6 h; Yield: 41% (1.05 g); Nature of compound: Pale brown solid; Melting Point: 188 – 190 °C; R<sub>f</sub>: 0.19 in 30% ethyl acetate in hexanes; IR (KBr):  $\nu$  (cm<sup>-1</sup>) = 3459, 2914, 2074, 1638, 1214, 777. <sup>1</sup>H NMR (400 MHz, DMSO)  $\delta$  7.82 – 7.78 (m, 3H), 7.60 – 7.57 (m, 4H), 7.39 – 7.35 (m, 1H), 6.64 (s, 2H). <sup>13</sup>C{<sup>1</sup>H} NMR (100 MHz, DMSO)  $\delta$  151.9, 145.1, 141.9, 137.2, 136.4, 134.5, 130.9, 130.3, 129.2, 128.9, 125.5, 124.5. HRMS (ESI)  $m/z$ : [M+H]<sup>+</sup> Calcd for C<sub>14</sub>H<sub>11</sub>ClN<sub>3</sub> 256.0641; Found 256.0652

### 3-(4-Bromophenyl)quinoxalin-2-amine (3d)<sup>2</sup>

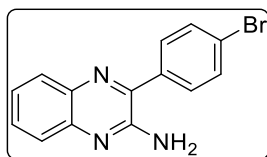

Reaction Time: 6 h; Yield: 47% (1.41 g); Nature of compound: Pale brown solid; Melting Point: 204 – 206 °C; R<sub>f</sub>: 0.19 in 30% ethyl acetate in hexanes; IR (KBr):  $\nu$  (cm<sup>-1</sup>) = 3432, 2856, 2087, 1635, 1220, 784. <sup>1</sup>H NMR (400 MHz, DMSO)  $\delta$  7.80 (d, *J* = 8 Hz, 1H), 7.73 (s, 4H), 7.58 – 7.57 (m, 2H), 7.39 – 7.36 (m, 1H), 6.64 (s, 2H). <sup>13</sup>C{<sup>1</sup>H} NMR (100 MHz, DMSO)  $\delta$  151.9, 145.1, 141.9, 137.2, 136.8, 132.1, 131.1, 130.3, 128.9, 125.5, 124.5, 123.2. HRMS (ESI) *m/z*: [M+H]<sup>+</sup> Calcd for C<sub>14</sub>H<sub>11</sub>N<sub>3</sub>Br 300.0131 and 302.0111; Found 300.0104 and 302.0084

### 3-(*p*-Tolyl)quinoxalin-2-amine (3e)<sup>1</sup>

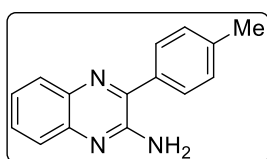

Reaction Time: 6 h; Yield: 54% (1.10 g); Nature of compound: Pale brown solid; Melting Point: 167 – 169 °C; R<sub>f</sub>: 0.19 in 30% ethyl acetate in hexanes; IR (KBr):  $\nu$  (cm<sup>-1</sup>) = 3438, 3021, 2093, 1631, 1217, 778. <sup>1</sup>H NMR (400 MHz, DMSO)  $\delta$  7.79 (d, *J* = 7.2 Hz, 1H), 7.67 (d, *J* = 6.8 Hz, 2H), 7.56 (s, 2H), 7.35 (d, *J* = 6 Hz, 3H), 6.56 (s, 2H), 2.40 (s, 3H). <sup>13</sup>C{<sup>1</sup>H} NMR (100 MHz, DMSO)  $\delta$  151.9, 146.2, 141.7, 139.3, 137.3, 134.7, 129.9, 129.8, 128.9, 128.8, 125.5, 124.4, 21.5. HRMS (ESI) *m/z*: [M+H]<sup>+</sup> Calcd for C<sub>15</sub>H<sub>14</sub>N<sub>3</sub> 236.1188; Found 236.1201

### 3-(4-Methoxyphenyl)quinoxalin-2-amine (3f)<sup>1</sup>

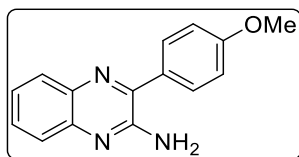

Reaction Time: 10 h; Yield: 53% (1.34 g); Nature of compound: Pale brown solid; Melting Point: 152 – 154 °C; R<sub>f</sub>: 0.19 in 30% ethyl acetate in hexanes; IR (KBr):  $\nu$  (cm<sup>-1</sup>) = 3484, 3010, 2063, 1637, 1234, 769. <sup>1</sup>H NMR (400 MHz, DMSO)  $\delta$  7.80 – 7.74 (m, 3H), 7.58 – 7.52 (m, 2H), 7.35 (t, *J* = 7.6 Hz, 1H), 7.09 (d, *J* = 8.8 Hz, 2H), 6.56 (s, 2H), 3.83 (s, 3H). <sup>13</sup>C{<sup>1</sup>H} NMR (100 MHz, DMSO)  $\delta$  160.6, 152.0, 145.9, 141.6, 137.4, 130.4, 129.8, 129.7, 128.8, 125.4, 124.4, 114.6, 55.8. HRMS (ESI) *m/z*: [M+H]<sup>+</sup> Calcd for C<sub>15</sub>H<sub>14</sub>N<sub>3</sub>O 252.1137; Found 252.1147

### 3-(2-Chlorophenyl)quinoxalin-2-amine (3g)<sup>1</sup>

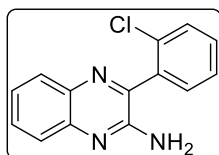

Reaction Time: 6 h; Yield: 57% (1.46 g); Nature of compound: Pale brown solid; Melting Point: 180 – 182 °C; R<sub>f</sub>: 0.19 in 30% ethyl acetate in hexanes; IR (KBr):  $\nu$  (cm<sup>-1</sup>) = 3451, 3012, 2099, 1664, 1231, 777. <sup>1</sup>H NMR (400 MHz, DMSO)  $\delta$  7.80 (d, *J* = 8.1 Hz, 1H), 7.62 (d, *J* = 7.5 Hz, 3H), 7.58 – 7.46 (m, 3H), 7.40 – 7.32 (m, 1H), 6.50 (s, 2H). <sup>13</sup>C{<sup>1</sup>H} NMR (100 MHz, DMSO)  $\delta$  151.6, 144.8, 141.9, 136.1, 135.7, 132.1, 130.9, 130.8, 129.9, 129.7, 128.5, 127.7, 125.2, 123.8. HRMS (ESI) *m/z*: [M+H]<sup>+</sup> Calcd for C<sub>14</sub>H<sub>11</sub>ClN<sub>3</sub> 256.0641; Found 256.0618

### 3-(*o*-Tolyl)quinoxalin-2-amine (3h)

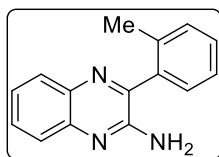

Reaction Time: 6 h; Yield: 61% (1.44 g); Nature of compound: Pale brown solid; Melting Point: 164 – 166 °C;  $R_f$ : 0.19 in 30% ethyl acetate in hexanes; IR (KBr):  $\nu$  (cm<sup>-1</sup>) = 3401, 3083, 2067, 1697, 1236, 771. <sup>1</sup>H NMR (400 MHz, DMSO)  $\delta$  7.78 (d,  $J$  = 8 Hz, 1H), 7.61 – 7.56 (m, 2H), 7.40 – 7.33 (m, 5H), 6.37 (s, 2H), 2.15 (s, 3H). <sup>13</sup>C{<sup>1</sup>H} NMR (100 MHz, DMSO)  $\delta$  152.2, 147.5, 142.1, 136.9, 136.8, 136.4, 131.0, 130.0, 129.4, 129.3, 128.9, 126.6, 125.6, 124.3, 19.4. HRMS (ESI)  $m/z$ : [M+H]<sup>+</sup> Calcd for C<sub>15</sub>H<sub>14</sub>N<sub>3</sub> 236.1188; Found 236.1205

### 3-(2-Methoxyphenyl)quinoxalin-2-amine (3i)<sup>1</sup>

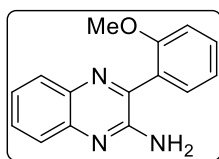

Reaction Time: 9 h; Yield: 52% (1.31 g); Nature of compound: Pale brown solid; Melting Point: 186 – 188 °C;  $R_f$ : 0.19 in 30% ethyl acetate in hexanes; IR (KBr):  $\nu$  (cm<sup>-1</sup>) = 3445, 2919, 2088, 1638, 1227, 775. <sup>1</sup>H NMR (400 MHz, DMSO)  $\delta$  7.77 (d,  $J$  = 8.4 Hz, 1H), 7.58 – 7.57 (m, 2H), 7.50 (t,  $J$  = 7.6 Hz, 1H), 7.37 – 7.33 (m, 2H), 7.18 (d,  $J$  = 8 Hz, 1H), 7.10 (t,  $J$  = 7.6 Hz, 1H), 6.27 (s, 2H), 3.77 (s, 3H). <sup>13</sup>C{<sup>1</sup>H} NMR (100 MHz, DMSO)  $\delta$  157.4, 152.6, 145.9, 142.0, 136.9, 131.1, 131.0, 129.9, 128.8, 126.3, 125.5, 124.1, 121.2, 112.3, 55.9. HRMS (ESI)  $m/z$ : [M+H]<sup>+</sup> Calcd for C<sub>15</sub>H<sub>14</sub>N<sub>3</sub>O 252.1131; Found 252.1310

### 3-(3-Fluorophenyl)quinoxalin-2-amine (3j)

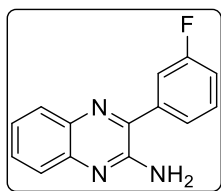

Reaction Time: 6 h; Yield: 64% (1.54 g); Nature of compound: Pale brown solid; Melting Point: 174 – 176 °C;  $R_f$ : 0.19 in 30% ethyl acetate in hexanes; IR (KBr):  $\nu$  (cm<sup>-1</sup>) = 3429, 2391, 2074, 1644, 1214, 768. <sup>1</sup>H NMR (400 MHz, DMSO)  $\delta$  7.81 (d,  $J$  = 8.4 Hz, 1H), 7.58 – 7.55 (m, 5H), 7.39 – 7.34 (m, 2H), 6.66 (s, 2H). <sup>13</sup>C{<sup>1</sup>H} NMR (100 MHz, DMSO)  $\delta$  162.6 (d,  $J$  = 242.5 Hz), 151.8, 144.8, 141.9, 139.8 (d,  $J$  = 7.7 Hz), 137.1, 131.3 (d,  $J$  = 8.4 Hz), 130.3, 129.0, 125.6, 125.1 (d,  $J$  = 2.7 Hz), 124.6, 116.6 (d,  $J$  = 20.8 Hz), 115.9 (d,  $J$  = 21.9 Hz). <sup>19</sup>F NMR (377 MHz, DMSO)  $\delta$  -112.5. HRMS (ESI)  $m/z$ : [M+H]<sup>+</sup> Calcd for C<sub>14</sub>H<sub>11</sub>FN<sub>3</sub> 240.0932; Found 240.0948

### 3-(3-Methoxyphenyl)quinoxalin-2-amine (3k)

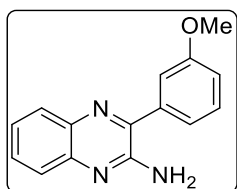

Reaction Time: 10 h; Yield: 58% (1.46 g); Nature of compound: Pale brown solid; Melting Point: 168 – 170 °C;  $R_f$ : 0.19 in 30% ethyl acetate in hexanes; IR (KBr):  $\nu$  (cm<sup>-1</sup>) = 3442, 2929, 2049, 1631, 1217, 774. <sup>1</sup>H NMR (400 MHz, DMSO)  $\delta$  7.81 (d,  $J$  = 8 Hz, 1H), 7.59 – 7.57 (m, 2H), 7.46 (t,  $J$  = 7.6 Hz, 1H), 7.36 (t,  $J$  = 6.4 Hz, 1H), 7.33 – 7.29 (m, 2H), 7.08 (d,  $J$  = 8 Hz, 1H), 6.59 (s, 2H), 3.83 (s, 3H). <sup>13</sup>C{<sup>1</sup>H} NMR (100 MHz, DMSO)  $\delta$  159.8, 151.9, 146.0, 141.9, 138.8, 137.2, 130.4, 130.1, 128.9, 125.5, 124.5, 121.1, 115.7, 114.1, 55.7. HRMS (ESI)  $m/z$ : [M+H]<sup>+</sup> Calcd for C<sub>15</sub>H<sub>14</sub>N<sub>3</sub>O 252.1131; Found 252.1106

### 3-(*m*-Tolyl)quinoxalin-2-amine (3l)

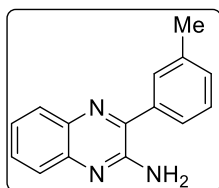

Reaction Time: 6 h; Yield: 74% (1.74 g); Nature of compound: Pale brown solid; Melting Point: 135 – 138 °C; R<sub>f</sub>: 0.19 in 30% ethyl acetate in hexanes; IR (KBr):  $\nu$  (cm<sup>-1</sup>) = 3429, 2040, 1644, 1223, 819, 774. <sup>1</sup>H NMR (400 MHz, DMSO)  $\delta$  7.81 (d, *J* = 8 Hz, 1H), 7.57 – 7.54 (m, 4H), 7.42 (t, *J* = 7.6 Hz, 1H), 7.38 – 7.32 (m, 2H), 6.56 (s, 2H), 2.40 (s, 3H). <sup>13</sup>C{<sup>1</sup>H} NMR (100 MHz, DMSO)  $\delta$  151.9, 146.3, 141.8, 138.5, 137.4, 137.3, 130.4, 130.0, 129.4, 129.1, 128.9, 125.9, 125.5, 124.4, 21.6. HRMS (ESI) *m/z*: [M+H]<sup>+</sup> Calcd for C<sub>15</sub>H<sub>14</sub>N<sub>3</sub> 236.1188; Found 236.1173

### 3-(3,5-Dimethylphenyl)quinoxalin-2-amine (3m)

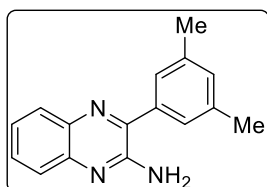

Reaction Time: 6 h; Yield: 67% (1.82 g); Nature of compound: Pale brown solid; Melting Point: 174 – 176 °C; R<sub>f</sub>: 0.19 in 30% ethyl acetate in hexanes; IR (KBr):  $\nu$  (cm<sup>-1</sup>) = 3439, 3029, 2093, 1632, 1236, 770. <sup>1</sup>H NMR (400 MHz, DMSO)  $\delta$  7.80 (d, *J* = 8.0 Hz, 1H), 7.56 (s, 2H), 7.34 (s, 3H), 7.13 (s, 1H), 6.57 (s, 2H), 2.35 (s, 6H). <sup>13</sup>C{<sup>1</sup>H} NMR (100 MHz, DMSO)  $\delta$  151.5, 146.0, 141.3, 137.8, 136.9, 136.8, 130.7, 129.5, 128.4, 126.1, 125.0, 123.9, 21.0. HRMS (ESI) *m/z*: [M+H]<sup>+</sup> Calcd for C<sub>16</sub>H<sub>16</sub>N<sub>3</sub> 272.1164; Found 272.1158

### 3-(2,3-Dimethoxyphenyl)quinoxalin-2-amine (3n)

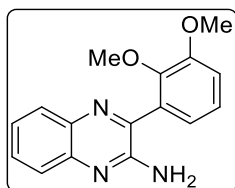

Reaction Time: 12 h; Yield: 59% (1.66 g); Nature of compound: Pale white solid; Melting Point: 179 – 181 °C;  $R_f$ : 0.19 in 30% ethyl acetate in hexanes; IR (KBr):  $\nu$  (cm<sup>-1</sup>) = 3425, 2100, 1631, 1535, 1235, 1073, 772. <sup>1</sup>H NMR (400 MHz, DMSO)  $\delta$  7.77 (d,  $J$  = 8.1 Hz, 1H), 7.57 (d,  $J$  = 4.3 Hz, 2H), 7.40 – 7.31 (m, 1H), 7.25 – 7.15 (m, 2H), 6.92 (dd,  $J$  = 5.4, 3.7 Hz, 1H), 6.34 (s, 2H), 3.87 (s, 3H), 3.66 (s, 3H). <sup>13</sup>C{<sup>1</sup>H} NMR (175 MHz, DMSO)  $\delta$  153.0, 152.5, 147.0, 145.5, 142.1, 136.7, 131.6, 130.0, 128.9, 125.5, 124.9, 124.2, 121.9, 114.3, 61.1, 56.2. HRMS (ESI)  $m/z$ : [M+H]<sup>+</sup> Calcd for C<sub>16</sub>H<sub>16</sub>N<sub>3</sub>O<sub>2</sub> 282.1242; Found 282.1224

### 3-(Naphthalen-2-yl)quinoxalin-2-amine (3o)<sup>1</sup>

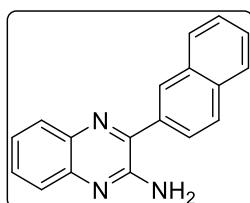

Reaction Time: 6 h; Yield: 77% (2.09 g); Nature of compound: Pale brown solid; Melting Point: 202 – 204 °C;  $R_f$ : 0.19 in 30% ethyl acetate in hexanes; IR (KBr):  $\nu$ (cm<sup>-1</sup>) = 3448, 2087, 1638, 1226, 784. <sup>1</sup>H NMR (400 MHz, DMSO)  $\delta$  8.37 (s, 1H), 8.08 – 8.04 (m, 2H), 8.01 – 7.98 (m, 1H), 7.89 – 7.85 (m, 2H), 7.63 – 7.56 (m, 4H), 7.40 – 7.36 (m, 1H), 6.72 (s, 2H). <sup>13</sup>C{<sup>1</sup>H} NMR (100 MHz, DMSO)  $\delta$  152.1, 146.1, 141.9, 137.4, 134.9, 133.7, 133.2, 130.1, 129.1, 128.9, 128.8, 128.3, 128.1, 127.4, 126.9, 126.6, 125.6, 124.5. HRMS (ESI)  $m/z$ : [M+H]<sup>+</sup> Calcd for C<sub>18</sub>H<sub>14</sub>N<sub>3</sub> 272.1188; Found 272.1162



### 3-(Naphthalen-1-yl)quinoxalin-2-amine (3p)<sup>1</sup>

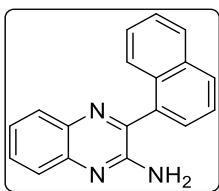

Reaction Time: 6 h; Yield: 64% (1.73 g); Nature of compound: White solid; Melting Point: 170 – 172 °C; R<sub>f</sub>: 0.20 in 30% ethyl acetate in hexanes; IR (KBr):  $\nu(\text{cm}^{-1}) = 3449, 2085, 1631, 1229, 780$ . <sup>1</sup>H NMR (400 MHz, DMSO)  $\delta$  8.14 – 8.01 (m, 2H), 7.82 (d,  $J = 8.0$  Hz, 1H), 7.73 – 7.59 (m, 4H), 7.60 - 7.45 (m, 3H), 7.40 (t,  $J = 7.2$  Hz, 1H), 6.42 (s, 2H). <sup>13</sup>C{<sup>1</sup>H} NMR (100 MHz, DMSO)  $\delta$  152.3, 146.0, 141.8, 136.5, 134.1, 133.5, 130.9, 129.8, 129.3, 128.6, 128.5, 127.0, 126.7, 126.2, 125.8, 125.3, 124.9, 123.9. HRMS (ESI)  $m/z$ : [M+H]<sup>+</sup> Calcd for C<sub>18</sub>H<sub>14</sub>N<sub>3</sub> 272.1188; Found 272.1172

### 6,7-Dichloro-3-phenylquinoxalin-2-amine (3q)<sup>1</sup>

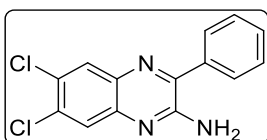

Reaction Time: 6 h; Yield: 57% (1.65 g); Nature of compound: Pale brown solid; Melting Point: 220 – 222 °C; R<sub>f</sub>: 0.19 in 30% ethyl acetate in hexanes; IR (KBr):  $\nu(\text{cm}^{-1}) = 3467, 3097, 2363, 1641, 1214, 778$ . <sup>1</sup>H NMR (400 MHz, DMSO)  $\delta$  8.03(s, 1H), 7.75(s, 3H), 7.54(s, 3H), 6.97(s, 2H). <sup>13</sup>C{<sup>1</sup>H} NMR (100 MHz, DMSO)  $\delta$  152.2, 147.5, 140.9, 136.3, 135.7, 131.9, 129.8, 129.1, 128.8, 128.4, 125.7, 125.6. HRMS (ESI)  $m/z$ : [M+H]<sup>+</sup> Calcd for C<sub>14</sub>H<sub>10</sub>Cl<sub>2</sub>N<sub>3</sub> 290.0252; Found 290.0257

### 6,7-Dichloro-3-(*o*-tolyl)quinoxalin-2-amine (3r)

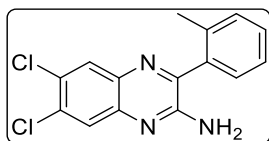

Reaction Time: 6 h; Yield: 49% (1.48 g); Nature of compound: Pale brown solid; Melting Point: 174 – 176 °C; R<sub>f</sub>: 0.19 in 30% ethyl acetate in hexanes; IR (KBr):  $\nu$  (cm<sup>-1</sup>) = 3459, 2885, 2315, 1693, 1115, 783. <sup>1</sup>H NMR (400 MHz, DMSO)  $\delta$  8.02 (s, 1H), 7.77 (d, *J* = 14.6 Hz, 1H), 7.38 (ddd, *J* = 17.1, 10.5, 5.8 Hz, 4H), 6.71 (s, 2H), 2.14 (s, 3H). <sup>13</sup>C{<sup>1</sup>H} NMR (100 MHz, DMSO)  $\delta$  152.5, 148.9, 141.2, 135.9, 135.6, 135.3, 131.9, 130.6, 129.3, 129.2, 128.7, 126.2, 125.8, 125.5, 18.9. HRMS (ESI) *m/z*: [M+H]<sup>+</sup> Calcd for C<sub>15</sub>H<sub>12</sub>Cl<sub>2</sub>N<sub>3</sub> 304.0408; Found 304.0421

### 6,7-Dichloro-3-(*p*-tolyl)quinoxalin-2-amine (3s)

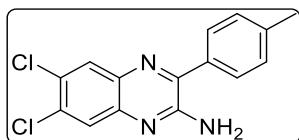

Reaction Time: 6 h; Yield: 41% (1.25 g); Nature of compound: Pale brown solid; Melting Point: 209 – 211 °C; R<sub>f</sub>: 0.19 in 30% ethyl acetate in hexanes; IR (KBr):  $\nu$  (cm<sup>-1</sup>) = 3468, 2887, 2319, 1656, 1125, 779. <sup>1</sup>H NMR (400 MHz, DMSO)  $\delta$  8.00 (s, 1H), 7.74 (s, 1H), 7.65 (d, *J* = 8.0 Hz, 2H), 7.34 (d, *J* = 7.9 Hz, 2H), 6.92 (s, 2H), 2.39 (s, 3H). <sup>13</sup>C{<sup>1</sup>H} NMR (100 MHz, DMSO)  $\delta$  152.2, 147.5, 140.8, 139.4, 135.8, 133.5, 131.7, 129.3, 129.1, 128.3, 125.6, 125.5, 20.9. HRMS (ESI) *m/z*: [M+H]<sup>+</sup> Calcd for C<sub>15</sub>H<sub>12</sub>Cl<sub>2</sub>N<sub>3</sub> 304.0408; Found 304.0391

### 3-(Benzo[d][1,3]dioxol-5-yl)quinoxalin-2-amine (3t)

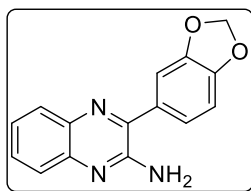

Reaction Time: 6 h; Yield: 68% (1.80 g); Nature of compound: Pale brown solid; Melting Point: 152 – 154 °C; R<sub>f</sub>: 0.19 in 30% ethyl acetate in hexanes; IR (KBr):  $\nu$  (cm<sup>-1</sup>) = 3419, 2093, 1641, 1528, 1223, 1069, 781. <sup>1</sup>H NMR (400 MHz, DMSO)  $\delta$  7.78 (d, *J* = 8.1 Hz, 1H), 7.55 (d, *J* = 3.3 Hz, 2H), 7.36 (d, *J* = 3.7 Hz, 1H), 7.28 (s, 2H), 7.06 (d, *J* = 8.4 Hz, 1H), 6.57 (s, 2H), 6.11 (s, 2H). <sup>13</sup>C{<sup>1</sup>H} NMR (100 MHz, DMSO)  $\delta$  151.9, 148.6, 147.9, 145.8, 141.7, 137.2, 131.3, 129.9, 128.8, 125.4, 124.4, 123.1, 109.3, 109.0, 101.7. HRMS (ESI) *m/z*: [M+H]<sup>+</sup> Calcd for C<sub>15</sub>H<sub>12</sub>N<sub>3</sub>O<sub>2</sub> 266.0930; Found 266.0919

### 3-(benzo[d][1,3]dioxol-5-yl)-6,7-dichloroquinoxalin-2-amine (3u)

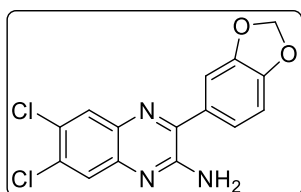

Reaction Time: 6 h; Yield: 42% (1.40 g); Nature of compound: Pale brown solid; Melting Point: 208-210 °C; R<sub>f</sub>: 0.19 in 30% ethyl acetate in hexanes; IR (KBr):  $\nu$  (cm<sup>-1</sup>) = 3454, 2852, 2352, 1653, 1175, 783. <sup>1</sup>H NMR (700 MHz, DMSO)  $\delta$  8.00 (s, 1H), 7.73 (s, 1H), 7.27 (s, 2H), 7.06 (d, *J* = 7.3 Hz, 1H), 6.95 (s, 2H), 6.12 (s, 2H). <sup>13</sup>C{<sup>1</sup>H} NMR (175 MHz, DMSO)  $\delta$  152.7, 149.0, 147.9, 147.5, 141.2, 136.1, 132.1, 130.5, 129.5, 126.1, 125.9, 123.3, 109.3, 109.1, 101.9. HRMS (ESI) *m/z*: [M+H]<sup>+</sup> Calcd for C<sub>15</sub>H<sub>10</sub>N<sub>3</sub>Cl<sub>2</sub>O<sub>2</sub> 334.0150; Found 334.0140

### 3-(4-(Trifluoromethyl)phenyl)quinoxalin-2-amine (3v)

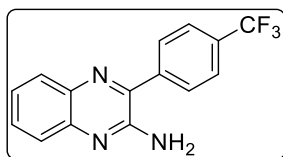

Reaction Time: 6 h; Yield: 46% (1.32 g); Nature of compound: Pale white solid; Melting Point: 201 – 203 °C;  $R_f$ : 0.19 in 30% ethyl acetate in hexanes; IR (KBr):  $\nu$  ( $\text{cm}^{-1}$ ) = 3440, 2096, 1644, 1524, 1229, 1064, 770.  $^1\text{H}$  NMR (400 MHz, DMSO)  $\delta$  7.99 (d,  $J$  = 8.1 Hz, 2H), 7.90 (d,  $J$  = 8.2 Hz, 2H), 7.83 (d,  $J$  = 8.2 Hz, 1H), 7.60 (d,  $J$  = 3.7 Hz, 2H), 7.39 (dt,  $J$  = 8.3, 4.2 Hz, 1H), 6.74 (s, 2H).  $^{13}\text{C}\{^1\text{H}\}$  NMR (100 MHz, DMSO)  $\delta$  151.9, 144.8, 142.1, 141.6, 137.1, 130.5, 129.98 (q,  $J$  = 30 Hz), 129.1, 129.0, 126.1 (q,  $J$  = 3.4 Hz), 126.3 (q,  $J$  = 270 Hz) 125.6, 124.6.  $^{19}\text{F}$  NMR (377 MHz, DMSO)  $\delta$  -61.2. HRMS (ESI)  $m/z$ :  $[\text{M}+\text{H}]^+$  Calcd for  $\text{C}_{15}\text{H}_{11}\text{F}_3\text{N}_3$  290.0905; Found 290.0919

### 3-(2,4,5-Trifluorophenyl)quinoxalin-2-amine (3w)

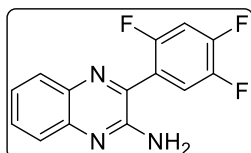

Reaction Time: 6 h; Yield: 39% (1.07 g); Nature of compound: Pale white solid; Melting Point: 216 – 218 °C;  $R_f$ : 0.19 in 30% ethyl acetate in hexanes; IR (KBr):  $\nu$  ( $\text{cm}^{-1}$ ) = 3425, 2102, 1643, 1534, 1223, 1069, 771.  $^1\text{H}$  NMR (400 MHz, DMSO)  $\delta$  7.82 - 7.69 (m, 3H), 7.63 - 7.59 (m, 2H), 7.40 - 7.38 (m, 1H), 6.73 (s, 2H).  $^{13}\text{C}\{^1\text{H}\}$  NMR (175 MHz, DMSO)  $\delta$  155.4 (dd,  $J$  = 245, 10.3 Hz), 151.9, 149.9 (dt,  $J$  = 248, 13.3 Hz), 146.4 (ddd,  $J$  = 240, 11.5, 1.9 Hz), 141.9, 139.9, 136.1, 130.3, 128.6, 125.2, 124.0, 121.5 (dd,  $J$  = 18.2, 4.2 Hz), 119.3 (dd,  $J$  = 20.0, 4.2 Hz), 106.9 (dd,  $J$  = 28.5, 21.5 Hz).  $^{19}\text{F}$  NMR (377 MHz,  $\text{CDCl}_3$ )  $\delta$  -111.5 (dd,  $J$  = 15.5, 5.6 Hz), -

128.5 (dd,  $J = 23.4, 5.3$  Hz), -138.1 (dd,  $J = 22.6, 15.1$  Hz). HRMS (ESI)  $m/z$ :  $[M+H]^+$  Calcd for  $C_{14}H_9F_3N_3$  276.0749; Found 276.0725

#### 4-Methyl-*N*-(3-phenylquinoxalin-2-yl)benzenesulfonamide (4a)

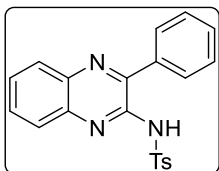

Reaction Time: 12 h; Yield: 76% (0.571 g); Nature of compound: White solid; Melting Point: 263 – 265 °C;  $R_f$ : 0.23 in 30% ethyl acetate in hexanes; IR (KBr):  $\nu$  ( $cm^{-1}$ ) = 3442, 2914, 2069, 1626, 1373, 1274, 808. HRMS (ESI)  $m/z$ :  $[M+H]^+$  Calcd for  $C_{21}H_{18}N_3O_2S$  376.1120; Found 376.1122

#### *N*-(3-(4-Fluorophenyl)quinoxalin-2-yl)-4-methylbenzenesulfonamide (4b)

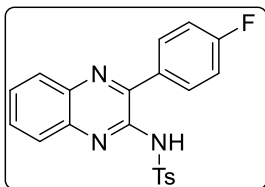

Reaction Time: 12 h; Yield: 70% (0.551 g); Nature of compound: White solid; Melting Point: 194 – 196 °C;  $R_f$ : 0.23 in 30% ethyl acetate in hexanes; IR (KBr):  $\nu$  ( $cm^{-1}$ ) = 3439, 2919, 2360, 1648, 1218, 778. HRMS (ESI)  $m/z$ :  $[M+H]^+$  Calcd for  $C_{21}H_{17}FN_3O_2S$  394.1025; Found 394.1027

***N*-(3-(4-Chlorophenyl)quinoxalin-2-yl)-4-methylbenzenesulfonamide (4c)**

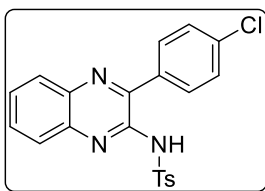

Reaction Time: 12 h; Yield: 64% (0.524 g); Nature of compound: White solid; Melting Point: 210 – 212 °C;  $R_f$ : 0.23 in 30% ethyl acetate in hexanes; IR (KBr):  $\nu$  ( $\text{cm}^{-1}$ ) = 3439, 2049, 1632, 1214, 774. HRMS (ESI)  $m/z$ :  $[\text{M}+\text{H}]^+$  Calcd for  $\text{C}_{21}\text{H}_{17}\text{ClN}_3\text{O}_2\text{S}$  410.0725; Found 410.0708

***N*-(3-(4-Bromophenyl)quinoxalin-2-yl)-4-methylbenzenesulfonamide (4d)**

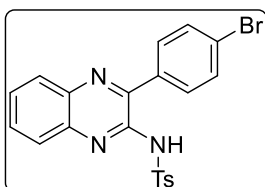

Reaction Time: 12 h; Yield: 59% (0.535 g); Nature of compound: White solid; Melting Point: 290 – 290 °C;  $R_f$ : 0.23 in 30% ethyl acetate in hexanes; IR (KBr):  $\nu$  ( $\text{cm}^{-1}$ ) = 3448, 2923, 2084, 1635, 1224, 771. HRMS (ESI)  $m/z$ :  $[\text{M}+\text{H}]^+$  Calcd for  $\text{C}_{21}\text{H}_{17}\text{BrN}_3\text{O}_2\text{S}$  454.0219 and 456.0199; Found 454.0218 and 456.0194.

**4-Methyl-*N*-(3-(*p*-tolyl)quinoxalin-2-yl)benzenesulfonamide (4e)**

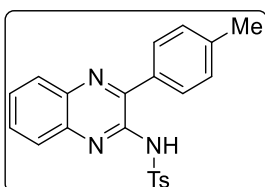

Reaction Time: 12 h; Yield: 68% (0.531 g); Nature of compound: White solid; Melting Point: 295 – 297 °C;  $R_f$ : 0.23 in 30% ethyl acetate in hexanes; IR (KBr):  $\nu$  ( $\text{cm}^{-1}$ ) = 3442, 3005, 2407,

1644, 1271, 771. HRMS (ESI)  $m/z$ :  $[M+Na]^+$  Calcd for  $C_{22}H_{19}N_3O_2SNa$  412.1096; Found 412.1093

***N*-(3-(4-Methoxyphenyl)quinoxalin-2-yl)-4-methylbenzenesulfonamide (4f)**

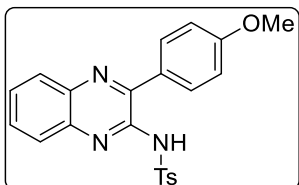

Reaction Time: 12 h; Yield: 67% (0.543 g); Nature of compound: White solid; Melting Point: 184 – 186 °C;  $R_f$ : 0.23 in 30% ethyl acetate in hexanes; IR (KBr):  $\nu$  ( $cm^{-1}$ ) = 3445, 2993, 2398, 1641, 1221, 771. HRMS (ESI)  $m/z$ :  $[M+H]^+$  Calcd for  $C_{22}H_{20}N_3O_3S$  406.1220; Found 406.1231

***N*-(3-(2-Chlorophenyl)quinoxalin-2-yl)-4-methylbenzenesulfonamide (4g)**

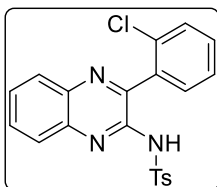

Reaction Time: 12 h; Yield: 59% (0.483 g); Nature of compound: White solid; Melting Point: 215 – 217 °C;  $R_f$ : 0.23 in 30% ethyl acetate in hexanes; IR (KBr):  $\nu$  ( $cm^{-1}$ ) = 3436, 3002, 2322, 2084, 1638, 1382, 771. HRMS (ESI)  $m/z$ :  $[M+H]^+$  Calcd for  $C_{21}H_{17}ClN_3O_2S$  410.0730; Found 410.0721

#### 4-Methyl-*N*-(3-(*o*-tolyl)quinoxalin-2-yl)benzenesulfonamide (4h)

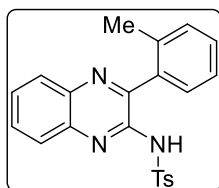

Reaction Time: 12 h; Yield: 68% (0.529 g); Nature of compound: White solid; Melting Point: 214 – 216 °C;  $R_f$ : 0.23 in 30% ethyl acetate in hexanes; IR (KBr):  $\nu$  ( $\text{cm}^{-1}$ ) = 3435, 3002, 2081, 1644, 1217, 774. HRMS (ESI)  $m/z$ :  $[\text{M}+\text{H}]^+$  Calcd for  $\text{C}_{22}\text{H}_{20}\text{N}_3\text{O}_2\text{S}$  390.1276; Found 390.1306

#### *N*-(3-(2-Methoxyphenyl)quinoxalin-2-yl)-4-methylbenzenesulfonamide (4i)

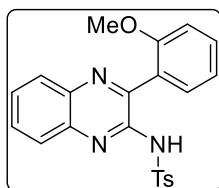

Reaction Time: 12 h; Yield: 64% (0.519 g); Nature of compound: White solid; Melting Point: 170 – 172 °C;  $R_f$ : 0.23 in 30% ethyl acetate in hexanes; IR (KBr):  $\nu$  ( $\text{cm}^{-1}$ ) = 3429, 3017, 2354, 1644, 1223, 778. HRMS (ESI)  $m/z$ :  $[\text{M}+\text{H}]^+$  Calcd for  $\text{C}_{22}\text{H}_{20}\text{N}_3\text{O}_3\text{S}$  406.1220; Found 406.1209

#### *N*-(3-(3-Fluorophenyl)quinoxalin-2-yl)-4-methylbenzenesulfonamide (4j)

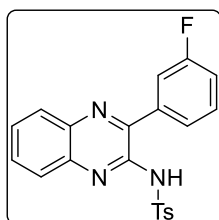

Reaction Time: 12 h; Yield: 70% (0.582 g); Nature of compound: White solid; Melting Point: 189 – 191 °C;  $R_f$ : 0.23 in 30% ethyl acetate in hexanes; IR (KBr):  $\nu$  ( $\text{cm}^{-1}$ ) = 3439, 2071, 1638,



1221, 774. HRMS (ESI)  $m/z$ :  $[M+Na]^+$  Calcd for  $C_{21}H_{16}FNaN_3O_2S$  416.0839; Found 416.0828

***N*-(3-(3-Methoxyphenyl)quinoxalin-2-yl)-4-methylbenzenesulfonamide (4k)**

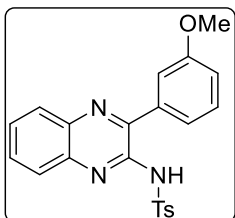

Reaction Time: 12 h; Yield: 76% (0.650 g); Nature of compound: White solid; Melting Point: 167 – 169 °C;  $R_f$ : 0.23 in 30% ethyl acetate in hexanes; IR (KBr):  $\nu$  ( $cm^{-1}$ ) = 3442, 2852, 2359, 1634, 1136, 782. HRMS (ESI)  $m/z$ :  $[M+Na]^+$  Calcd for  $C_{22}H_{19}NaN_3O_3S$  428.1039; Found 428.1011

**4-Methyl-*N*-(3-(*m*-tolyl)quinoxalin-2-yl)benzenesulfonamide (4l)**

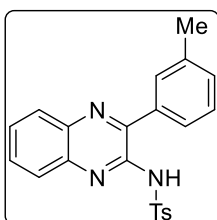

Reaction Time: 12 h; Yield: 59% (0.459 g); Nature of compound: White solid; Melting Point: 182 – 184 °C;  $R_f$ : 0.23 in 30% ethyl acetate in hexanes; IR (KBr):  $\nu$  ( $cm^{-1}$ ) = 3432, 2959, 2366, 2081, 1631, 1217, 784. HRMS (ESI)  $m/z$ :  $[M+H]^+$  Calcd for  $C_{22}H_{20}N_3O_2S$  390.1276; Found 390.1266

***N*-(3-(3,5-Dimethylphenyl)quinoxalin-2-yl)-4-methylbenzenesulfonamide (4m)**

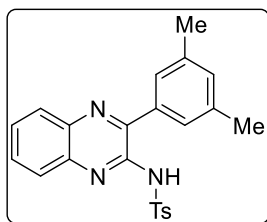

Reaction Time: 12 h; Yield: 60% (0.485 g); Nature of compound: White solid; Melting Point: 138 – 140 °C;  $R_f$ : 0.23 in 30% ethyl acetate in hexanes; IR (KBr):  $\nu$  ( $\text{cm}^{-1}$ ) = 3448, 2923, 1612, 1227, 775. HRMS (ESI)  $m/z$ :  $[\text{M}+\text{H}]^+$  Calcd for  $\text{C}_{23}\text{H}_{22}\text{N}_3\text{O}_2\text{S}$  404.1433; Found 404.1436

***N*-(3-(2,3-Dimethoxyphenyl)quinoxalin-2-yl)-4-methylbenzenesulfonamide (4n)**

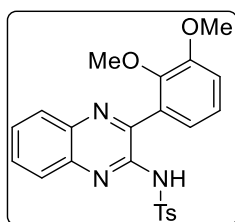

Reaction Time: 12 h; Yield: 54% (0.235 g); Nature of compound: White solid; Melting Point: 186 – 188 °C;  $R_f$ : 0.19 in 30% ethyl acetate in hexanes; IR (KBr):  $\nu$  ( $\text{cm}^{-1}$ ) = 3445, 2922, 1609, 1229, 782. HRMS (ESI)  $m/z$ :  $[\text{M}+\text{H}]^+$  Calcd for  $\text{C}_{23}\text{H}_{22}\text{N}_3\text{O}_4\text{S}$  436.1331; Found 436.1347

**4-Methyl-*N*-(3-(naphthalen-2-yl)quinoxalin-2-yl)benzenesulfonamide (4o)**

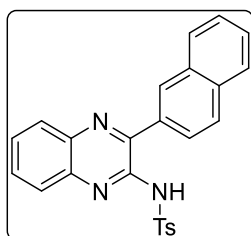

Reaction Time: 12 h; Yield: 69% (0.588 g); Nature of compound: White solid; Melting Point: 120 – 122 °C;  $R_f$ : 0.23 in 30% ethyl acetate in hexanes; IR (KBr):  $\nu$  ( $\text{cm}^{-1}$ ) = 3512, 2265, 1694,

1298, 1201, 770. HRMS (ESI)  $m/z$ :  $[M+H]^+$  Calcd for  $C_{25}H_{20}N_3O_2S$  426.1276; Found 426.1272

**4-Methyl-*N*-(3-(naphthalen-1-yl)quinoxali-2-yl)benzenesulfonamide (4p)**

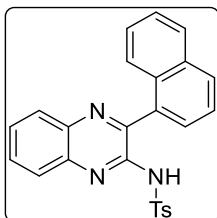

Reaction Time: 12 h; Yield: 63% (0.537 g); Nature of compound: White solid; Melting Point: 166 – 168 °C;  $R_f$ : 0.23 in 30% ethyl acetate in hexanes; IR (KBr):  $\nu$  ( $cm^{-1}$ ) = 3449, 2927, 2359, 1996, 1611, 1076, 776. HRMS (ESI)  $m/z$ :  $[M+H]^+$  Calcd for  $C_{25}H_{20}N_3O_2S$  426.1276; Found 426.1266

***N*-(6,7-Dichloro-3-phenylquinoxalin-2-yl)-4-methylbenzenesulfonamide (4q)**

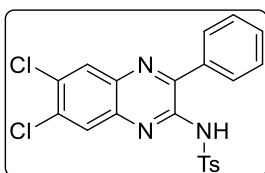

Reaction Time: 12 h; Yield: 50% (0.444 g); Nature of compound: White solid; Melting Point: 212 – 214 °C;  $R_f$ : 0.23 in 30% ethyl acetate in hexanes; IR (KBr):  $\nu$  ( $cm^{-1}$ ) = 3449, 2916, 2089, 1628, 1374, 1279, 801. HRMS (ESI)  $m/z$ :  $[M+H]^+$  Calcd for  $C_{21}H_{16}Cl_2N_3O_2S$  444.0340; Found 444.0320

***N*-(6,7-Dichloro-3-(*o*-tolyl)quinoxalin-2-yl)-4-methylbenzenesulfonamide (4r)**

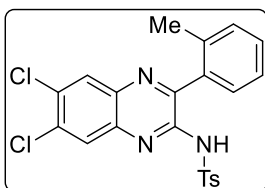

Reaction Time: 12 h; Yield: 52% (0.197 g); Nature of compound: White solid; Melting Point: 273 – 275 °C;  $R_f$ : 0.23 in 30% ethyl acetate in hexanes; IR (KBr):  $\nu$  ( $\text{cm}^{-1}$ ) = 3478, 2323, 1684, 1320, 1159, 786. HRMS (ESI)  $m/z$ :  $[\text{M}+\text{H}]^+$  Calcd for  $\text{C}_{22}\text{H}_{18}\text{Cl}_2\text{N}_3\text{O}_2\text{S}$  458.0497; Found 458.0474

***N*-(6,7-Dichloro-3-(*p*-tolyl)quinoxalin-2-yl)-4-methylbenzenesulfonamide (4s)**

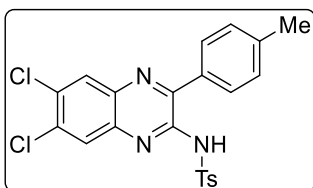

Reaction Time: 12 h; Yield: 64% (0.586 g); Nature of compound: White solid; Melting Point: 289 – 291 °C;  $R_f$ : 0.23 in 30% ethyl acetate in hexanes; IR (KBr):  $\nu$  ( $\text{cm}^{-1}$ ) = 3440, 2349, 1656, 1396, 1136, 785. HRMS (ESI)  $m/z$ :  $[\text{M}+\text{H}]^+$  Calcd for  $\text{C}_{22}\text{H}_{18}\text{Cl}_2\text{N}_3\text{O}_2\text{S}$  458.0497; Found 458.0490

***N*-(3-(Benzo[*d*][1,3]dioxol-5-yl)quinoxalin-2-yl)-4-methylbenzenesulfonamide (4t)**

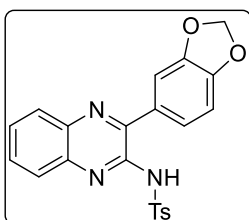

Reaction Time: 12 h; Yield: 68% (0.572 g); Nature of compound: White solid; Melting Point: 197 – 199 °C;  $R_f$ : 0.23 in 30% ethyl acetate in hexanes; IR (KBr):  $\nu$  ( $\text{cm}^{-1}$ ) = 3429, 2932, 2091,

1635, 1227, 781. HRMS (ESI)  $m/z$ :  $[M+H]^+$  Calcd for  $C_{22}H_{18}N_3O_4S$  420.1018; Found 420.0994

***N*-(3-(benzo[*d*][1,3]dioxol-5-yl)-6,7-dichloroquinoxalin-2-yl)-4-methylbenzenesulfonamide (4u)**

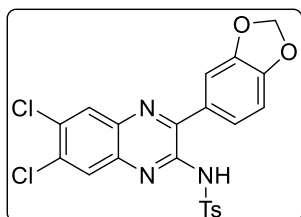

Reaction Time: 12 h; Yield: 38% (0.370 g); Nature of compound: White solid; Melting Point: 244-246 °C;  $R_f$ : 0.23 in 30% ethyl acetate in hexanes; IR (KBr):  $\nu$  ( $cm^{-1}$ ) = 3415, 2320, 1689, 1392, 1165, 776. HRMS (ESI)  $m/z$ :  $[M+H]^+$  Calcd for  $C_{22}H_{15}Cl_2N_3O_4S$  488.0239; Found 488.0222

**4-Methyl-*N*-(3-(4-(trifluoromethyl)phenyl)quinoxalin-2-yl)benzenesulfonamide (4v)**

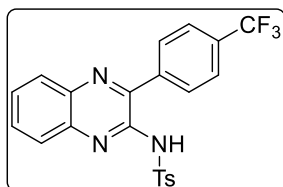

Reaction Time: 12 h; Yield: 51% (0.226 g); Nature of compound: yellow solid; Melting Point: 277 - 279 °C;  $R_f$ : 0.20 in 30% ethyl acetate in hexanes; IR (KBr):  $\nu$  ( $cm^{-1}$ ) = 3442, 2361, 1646, 1378, 1140, 778. HRMS (ESI)  $m/z$ :  $[M+H]^+$  Calcd for  $C_{22}H_{17}F_3N_3O_2S$  444.0994; Found 444.1009

#### 4-Methyl-*N*-(3-(2,4,5-trifluorophenyl)quinoxalin-2-yl)benzenesulfonamide (4w)

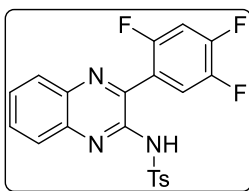

Reaction Time: 12 h; Yield: 43% (0.180 g); Nature of compound: pale yellow solid; Melting Point: 259 – 261 °C;  $R_f$ : 0.26 in 30% ethyl acetate in hexanes; IR (KBr):  $\nu$  (cm<sup>-1</sup>) = 3430, 2352, 1657, 1396, 1129, 763. HRMS (ESI)  $m/z$ : [M+H]<sup>+</sup> Calcd for C<sub>21</sub>H<sub>15</sub>F<sub>3</sub>N<sub>3</sub>O<sub>2</sub>S 430.0837; Found 430.0859

#### 6-Tosyl-6*H*-indolo[2,3-*b*]quinoxaline (5a)<sup>3</sup>

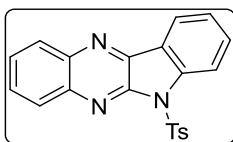

Reaction time: 1 h; Yield: 90% (0.169 g, 0.5 mmol), 84% (0.626 g, 2 mmol); Nature of compound: White solid; Melting Point: 146 – 147 °C;  $R_f$ : 0.30 in 30% ethyl acetate in hexanes; IR (KBr):  $\nu$  (cm<sup>-1</sup>) = 3422, 2999, 2356, 1868, 1229, 776. <sup>1</sup>H NMR (400 MHz, CDCl<sub>3</sub>)  $\delta$  8.53 (d,  $J$  = 8.5 Hz, 1H), 8.37 (d,  $J$  = 7.5 Hz, 1H), 8.27 (d,  $J$  = 8.1 Hz, 1H), 8.22 (d,  $J$  = 8.1 Hz, 1H), 8.12 (d,  $J$  = 8.3 Hz, 2H), 7.77 (tt,  $J$  = 8.4, 7.1 Hz, 3H), 7.51 (t,  $J$  = 7.2 Hz, 1H), 7.20 (d,  $J$  = 8.2 Hz, 2H), 2.30 (s, 3H). <sup>13</sup>C{<sup>1</sup>H} NMR (100 MHz, CDCl<sub>3</sub>)  $\delta$  145.6, 144.7, 141.7, 140.6, 140.5, 140.1, 135.3, 132.1, 129.7, 129.5, 129.1, 129.0, 128.5, 127.9, 124.7, 122.4, 121.9, 115.2, 21.6. HRMS (ESI)  $m/z$ : [M+H]<sup>+</sup> Calcd for C<sub>21</sub>H<sub>16</sub>N<sub>3</sub>O<sub>2</sub>S 374.0963; Found 374.0944.

### 8-Fluoro-6-tosyl-6H-indolo[2,3-b]quinoxaline (5b)

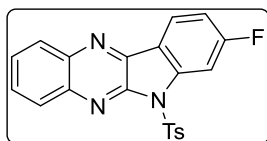

Reaction time: 1 h; Yield: 75% (0.147 g); Nature of compound: White solid; Melting Point: 293 – 295 °C;  $R_f$ : 0.30 in 30% ethyl acetate in hexanes; IR (KBr):  $\nu$  ( $\text{cm}^{-1}$ ) = 3445, 2922, 2362, 1606, 1154, 779.  $^1\text{H}$  NMR (400 MHz,  $\text{CDCl}_3$ )  $\delta$  8.34 – 8.28 (m, 3H), 8.21 (d,  $J = 8$  Hz, 1H), 8.17 (d,  $J = 8$  Hz, 2H), 7.82 – 7.78 (m, 2H), 7.27 – 7.23 (m, 3H), 2.34 (s, 3H).  $^{13}\text{C}\{^1\text{H}\}$  NMR (100 MHz,  $\text{CDCl}_3$ )  $\delta$  165.0 (d,  $J = 249.3$  Hz), 145.9, 144.8, 142.6 (d,  $J = 13.1$  Hz), 140.7, 139.7 (d,  $J = 2.8$  Hz), 135.1, 129.8, 129.5, 129.1, 129.0, 128.6, 128.1, 123.8 (d,  $J = 107$  Hz), 118.2 (d,  $J = 2.1$  Hz), 112.7 (d,  $J = 23.9$  Hz), 103.4, 103.1, 21.6.  $^{19}\text{F}$  NMR (377 MHz,  $\text{CDCl}_3$ )  $\delta$  -103.7. HRMS (ESI)  $m/z$ :  $[\text{M}+\text{H}]^+$  Calcd for  $\text{C}_{21}\text{H}_{15}\text{FN}_3\text{O}_2\text{S}$  392.0869; Found 392.0859

### 8-Chloro-6-tosyl-6H-indolo[2,3-b]quinoxaline (5c)<sup>3</sup>

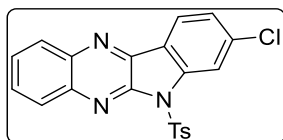

Reaction Time: 1 h; Yield: 67% (0.136 g); Nature of compound: White solid; Melting Point: 210 – 212 °C;  $R_f$ : 0.30 in 30% ethyl acetate in hexanes; IR (KBr):  $\nu$  ( $\text{cm}^{-1}$ ) = 3440, 2919, 2401, 1633, 1177, 775.  $^1\text{H}$  NMR (400 MHz,  $\text{CDCl}_3$ )  $\delta$  8.60 (s, 1H), 8.31 – 8.29 (m, 2H), 8.26 – 8.17 (m, 3H), 7.84 – 7.79 (m, 2H), 7.51 (d,  $J = 7.6$  Hz, 1H), 7.27 (d,  $J = 8.4$  Hz, 2H), 2.35 (s, 3H).  $^{13}\text{C}\{^1\text{H}\}$  NMR (100 MHz,  $\text{CDCl}_3$ )  $\delta$  145.9, 144.7, 142.0, 140.8, 140.0, 139.5, 138.1, 135.1, 129.8 (2C), 129.1 (2C), 128.7, 128.1, 125.3, 123.1, 120.5, 115.5, 21.6. HRMS (ESI)  $m/z$ :  $[\text{M}+\text{Na}]^+$  Calcd for  $\text{C}_{21}\text{H}_{14}\text{ClNaN}_3\text{O}_2\text{S}$  430.0387; Found 430.0385

### 8-Bromo-6-tosyl-6*H*-indolo[2,3-*b*]quinoxaline (5d)

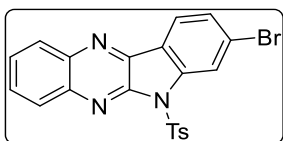

Reaction Time: 1 h; Yield: 70% (0.157 g); Nature of compound: White solid; Melting Point: 252 – 254 °C;  $R_f$ : 0.30 in 30% ethyl acetate in hexanes; IR (KBr):  $\nu$  ( $\text{cm}^{-1}$ ) = 3425, 2362, 2335, 1173, 1703, 774.  $^1\text{H}$  NMR (400 MHz,  $\text{CDCl}_3$ )  $\delta$  8.76 (s, 1H), 8.28 (d,  $J$  = 8 Hz, 1H), 8.22 (d,  $J$  = 8 Hz, 2H), 8.18 (d,  $J$  = 8 Hz, 2H), 7.85 – 7.77 (m, 2H), 7.66 (d,  $J$  = 8 Hz, 1H), 7.29 – 7.26 (m, 2H), 2.34 (s, 3H).  $^{13}\text{C}\{^1\text{H}\}$  NMR (100 MHz,  $\text{CDCl}_3$ )  $\delta$  145.9, 144.5, 142.0, 140.8, 140.1, 139.6, 135.0, 129.78, 129.76, 129.15, 129.13, 128.7, 128.1, 128.0, 126.2, 123.3, 120.9, 118.4, 21.7. HRMS (ESI)  $m/z$ :  $[\text{M}+\text{H}]^+$  Calcd for  $\text{C}_{21}\text{H}_{15}\text{BrN}_3\text{O}_2\text{S}$  452.0063 and 454.0043; Found 452.0077 and 454.0058

### 8-Methyl-6-tosyl-6*H*-indolo[2,3-*b*]quinoxaline (5e)<sup>3</sup>

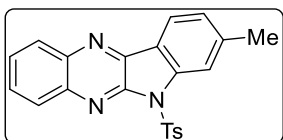

Reaction Time: 40 min; Yield: 89% (0.172 g); Nature of compound: White solid; Melting Point: 229 – 231 °C;  $R_f$ : 0.30 in 30% ethyl acetate in hexanes; IR (KBr):  $\nu$  ( $\text{cm}^{-1}$ ) = 3429, 2919, 2071, 1631, 1226, 778.  $^1\text{H}$  NMR (400 MHz,  $\text{CDCl}_3$ )  $\delta$  8.35 (s, 1H), 8.25 – 8.17 (m, 3H), 8.13 (d,  $J$  = 8 Hz, 2H), 7.79 – 7.72 (m, 2H), 7.32 (d,  $J$  = 8 Hz, 1H), 7.21 (d,  $J$  = 7.6 Hz, 2H), 2.63 (s, 3H), 2.30 (s, 3H).  $^{13}\text{C}\{^1\text{H}\}$  NMR (100 MHz,  $\text{CDCl}_3$ )  $\delta$  145.5, 144.9, 143.3, 142.1, 140.6(2C), 139.8, 135.4, 129.6, 129.16, 129.10, 128.9, 128.3, 127.9, 125.9, 122.1, 119.6, 115.4, 22.9, 21.6. HRMS (ESI)  $m/z$ :  $[\text{M}+\text{H}]^+$  Calcd for  $\text{C}_{22}\text{H}_{18}\text{N}_3\text{O}_2\text{S}$  388.1114; Found 388.1139



### 8-Methoxy-6-tosyl-6H-indolo[2,3-b]quinoxaline (5f)<sup>3</sup>

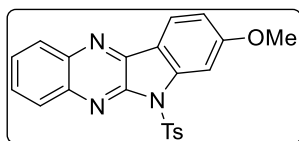

Reaction Time: 40 min; Yield: 94% (0.189 g); Nature of compound: White solid; Melting Point: 219 – 221 °C. 185–186 °C; R<sub>f</sub>: 0.25 in 10% ethyl acetate in hexanes; IR (KBr):  $\nu$  (cm<sup>-1</sup>) = 3467, 2983, 2378, 1894, 1159, 773. <sup>1</sup>H NMR (400 MHz, CDCl<sub>3</sub>)  $\delta$  8.22 – 8.20 (m, 2H), 8.15 – 8.10 (m, 3H), 8.06 (s, 1H), 7.74 – 7.71 (m, 2H), 7.20 (d,  $J$  = 8 Hz, 2H), 7.05 (d,  $J$  = 8.4 Hz, 1H), 4.02 (s, 3H), 2.30 (s, 3H). <sup>13</sup>C{<sup>1</sup>H} NMR (100 MHz, CDCl<sub>3</sub>)  $\delta$  163.3, 145.6, 144.9, 143.6, 140.6, 140.5, 139.2, 135.2, 129.7, 129.1, 128.8, 128.7, 128.3, 127.9, 123.4, 114.9, 112.6, 99.9, 56.0, 21.6. HRMS (ESI)  $m/z$ : [M+H]<sup>+</sup> Calcd for C<sub>22</sub>H<sub>18</sub>N<sub>3</sub>O<sub>3</sub>S 404.1063; Found 404.1091

### 10-Chloro-6-tosyl-6H-indolo[2,3-b]quinoxaline (5g)

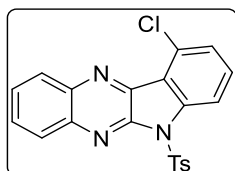

Reaction Time: 1.5 h; Yield: 69% (0.141 g); Nature of compound: White solid; Melting Point: 231 – 233 °C; R<sub>f</sub>: 0.30 in 30% ethyl acetate in hexanes; IR (KBr):  $\nu$  (cm<sup>-1</sup>) = 3457, 2961, 2359, 1869, 1214, 783. <sup>1</sup>H NMR (400 MHz, CDCl<sub>3</sub>)  $\delta$  8.50 (d,  $J$  = 8.4 Hz, 1H), 8.30 (d,  $J$  = 8.4 Hz, 1H), 8.26 (d,  $J$  = 8 Hz, 1H), 8.11 (d,  $J$  = 8.4 Hz, 2H), 7.83 – 7.77 (m, 2H), 7.64 (t,  $J$  = 8.4 Hz, 1H), 7.48 (d,  $J$  = 8 Hz, 1H), 7.21 (d,  $J$  = 8 Hz, 2H), 2.31 (s, 3H). <sup>13</sup>C{<sup>1</sup>H} NMR (100 MHz, CDCl<sub>3</sub>)  $\delta$  145.8, 144.2, 142.5, 140.8, 139.6, 139.4, 135.0, 131.8, 130.7, 130.1, 129.9, 129.7, 128.9, 128.4, 128.0, 125.9, 119.3, 113.3, 21.6. HRMS (ESI)  $m/z$ : [M+H]<sup>+</sup> Calcd for C<sub>21</sub>H<sub>15</sub>ClN<sub>3</sub>O<sub>2</sub>S 408.0568; Found 408.0568

### 10-Methyl-6-tosyl-6H-indolo[2,3-b]quinoxaline (5h)

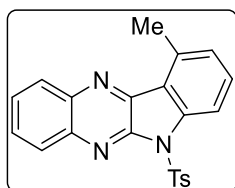

Reaction Time: 40 min; Yield: 89% (0.171 g); Nature of compound: White solid; Melting Point: 203 – 205 °C; R<sub>f</sub>: 0.30 in 30% ethyl acetate in hexanes; IR (KBr):  $\nu$  (cm<sup>-1</sup>) = 3426, 2992, 2366, 1862, 1223, 780. <sup>1</sup>H NMR (400 MHz, CDCl<sub>3</sub>)  $\delta$  8.40 (d, *J* = 8.4 Hz, 1H), 8.27 (d, 8 Hz, 1H), 8.23 (d, 8.4 Hz, 1H), 8.14 (d, *J* = 8 Hz, 2H), 7.81 – 7.73 (m, 2H), 7.61 (t, *J* = 8 Hz, 1H), 7.28 (d, *J* = 7.2 Hz, 1H), 7.21 (d, *J* = 8.0 Hz, 2H), 3.07 (s, 3H), 2.31 (s, 3H). <sup>13</sup>C{<sup>1</sup>H} NMR (100 MHz, CDCl<sub>3</sub>)  $\delta$  145.4, 144.5, 141.9, 141.8, 140.8, 139.2, 137.5, 135.4, 131.2, 129.6, 129.5, 129.2, 128.9, 128.0, 127.9, 126.2, 120.1, 112.2, 21.6, 19.6. HRMS (ESI) *m/z*: [M+H]<sup>+</sup> Calcd for C<sub>22</sub>H<sub>18</sub>N<sub>3</sub>O<sub>2</sub>S 388.1114; Found 388.1121

### 10-Methoxy-6-tosyl-6H-indolo[2,3-b]quinoxaline (5i)

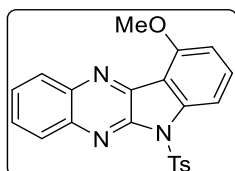

Reaction Time: 40 min; Yield: 77% (0.156 g); Nature of compound: White solid; Melting Point: 209 – 211 °C; R<sub>f</sub>: 0.30 in 30% ethyl acetate in hexanes; IR (KBr):  $\nu$  (cm<sup>-1</sup>) = 3465, 2989, 2363, 1896, 1268, 786. <sup>1</sup>H NMR (400 MHz, CDCl<sub>3</sub>)  $\delta$  8.29 – 8.23 (m, 4H), 7.97 (d, *J* = 7.2 Hz, 1H), 7.80 – 7.96 (m, 2H), 7.45 – 7.36 (m, 3H), 7.19 (d, *J* = 7.6 Hz, 1H), 3.93 (s, 3H), 2.44 (s, 3H). <sup>13</sup>C{<sup>1</sup>H} NMR (100 MHz, CDCl<sub>3</sub>)  $\delta$  149.1, 147.4, 144.5, 141.7, 140.8, 140.3, 137.7, 131.7, 129.5, 129.4, 129.3, 129.1, 128.6, 127.8, 126.2, 125.6, 115.5, 114.5, 56.1, 21.7. HRMS (ESI) *m/z*: [M+Na]<sup>+</sup> Calcd for C<sub>22</sub>H<sub>17</sub>NaN<sub>3</sub>O<sub>3</sub>S 426.0883; Found 426.0859

### 9-Fluoro-6-tosyl-6*H*-indolo[2,3-*b*]quinoxaline (5j):

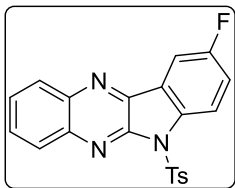

Reaction time: 1 h; Yield: 87% (0.162 g); Nature of compound: White solid; Melting Point: 241 – 243 °C; R<sub>f</sub>: 0.30 in 30% ethyl acetate in hexanes; IR (KBr):  $\nu$  (cm<sup>-1</sup>) = 3439, 3012, 2069, 1641, 1221, 774. <sup>1</sup>H NMR (400 MHz, CDCl<sub>3</sub>)  $\delta$  8.53-8.49 (m, 1H), 8.27 (d, *J* = 8.4 Hz, 1H), 8.21 (d, *J* = 8.0 Hz, 1H), 8.09 (d, *J* = 7.6 Hz, 2H), 8.02 (d, *J* = 6.0 Hz, 1H), 7.84-7.75 (m, 2H), 7.45 (t, *J* = 8.0 Hz, 1H), 7.21 (d, *J* = 7.6 Hz, 2H), 2.30 (s, 3H). <sup>13</sup>C{<sup>1</sup>H} NMR (100 MHz, CDCl<sub>3</sub>)  $\delta$  159.9 (d, *J* = 243.4 Hz), 145.7, 145.1, 140.7, 140.3, 139.8 (d, *J* = 3.7 Hz), 137.7 (d, *J* = 1.4 Hz), 135.1, 129.9, 129.7, 129.3, 129.2, 128.6, 127.9, 123.4 (d, *J* = 9.2 Hz), 119.4 (d, *J* = 24.4 Hz), 116.6 (d, *J* = 8.2 Hz), 108.5 (d, *J* = 24.4 Hz), 21.6. <sup>19</sup>F NMR (377 MHz, CDCl<sub>3</sub>)  $\delta$  -115.05. HRMS (ESI) *m/z*: [M+H]<sup>+</sup> Calcd for C<sub>21</sub>H<sub>15</sub>FN<sub>3</sub>O<sub>2</sub>S 392.0864; Found 392.0867

### 9-Methoxy-6-tosyl-6*H*-indolo[2,3-*b*]quinoxaline (5k)

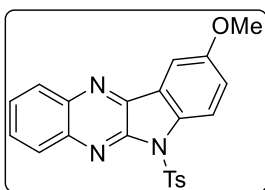

Reaction Time: 1 h; Yield: 79% (0.159 g); Nature of compound: White solid; Melting Point: 174 – 176 °C; R<sub>f</sub>: 0.30 in 30% ethyl acetate in hexanes; IR (KBr):  $\nu$  (cm<sup>-1</sup>) = 3426, 2926, 2401, 1873, 1189, 776. <sup>1</sup>H NMR (400 MHz, CDCl<sub>3</sub>)  $\delta$  8.42 (d, *J* = 8.8 Hz, 1H), 8.27 (d, *J* = 7.2 Hz, 1H), 8.20 (d, *J* = 7.2 Hz, 1H), 8.06 (d, *J* = 7.2 Hz, 2H), 7.79 – 7.75 (m, 3H), 7.31 (d, *J* = 8 Hz, 1H), 7.17 (d, *J* = 6.8 Hz, 2H), 3.95 (s, 3H), 2.28 (s, 3H). <sup>13</sup>C{<sup>1</sup>H} NMR (100 MHz, CDCl<sub>3</sub>)  $\delta$  157.2, 145.4, 145.2, 140.6 (2C), 140.1, 135.9, 135.2, 129.6, 129.5, 129.2, 129.0, 128.4, 127.8,

122.9, 120.8, 116.5, 104.3, 55.9, 21.6. HRMS (ESI)  $m/z$ :  $[M+H]^+$  Calcd for  $C_{22}H_{18}N_3O_3S$  404.1063; Found 404.1078

**7-Methyl-6-tosyl-6H-indolo[2,3-b]quinoxaline/9-methyl-6-tosyl-6H-indolo[2,3-b]quinoxaline (1:1) (5l)**

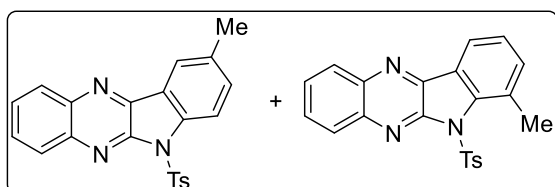

Reaction Time: 1 h; Yield: 82% (1:1) (0.160 g); Nature of compound: White solid; Melting Point: 181 – 183 °C;  $R_f$ : 0.30 in 30% ethyl acetate in hexanes; IR (KBr):  $\nu$  ( $cm^{-1}$ ) = 3429, 2941, 2074, 1625, 1214, 771.  $^1H$  NMR (400 MHz,  $CDCl_3$ ) (1:1 regioisomers)  $\delta$  8.39 (d,  $J$  = 8.4 Hz, 1H), 8.26 (d,  $J$  = 8 Hz, 1H), 8.21 – 8.18 (m, 2H), 8.15 -8.07 (m, 5H), 7.80 – 7.71 (m, 6H), 7.53 (d,  $J$  = 8 Hz, 2H), 7.44 (t,  $J$  = 7.2 Hz, 1H), 7.18 (d,  $J$  = 8.4 Hz, 2H), 7.06 (d,  $J$  = 8 Hz, 2H), 2.81 (s, 3H), 2.53 (s, 3H), 2.28 (s, 3H), 2.25 (s, 3H).  $^{13}C\{^1H\}$  NMR (100 MHz,  $CDCl_3$ ) (1:1 regioisomers)  $\delta$  148.4, 145.4, 144.9, 143.2, 142.5, 141.0, 140.6, 140.6, 140.0, 139.9, 139.8, 135.3 (2C), 135.3, 134.8, 134.6, 133.2 (2C), 130.5, 129.6, 129.5, 129.4, 129.3, 129.1, 129.0, 128.9, 128.8, 128.3, 127.9, 127.8, 126.2, 126.1, 122.3, 122.1, 119.7, 114.9, 22.0, 21.6, 21.5, 21.1. HRMS (ESI)  $m/z$ :  $[M+H]^+$  Calcd for  $C_{22}H_{18}N_3O_2S$  388.1114; Found 388.1104

**7,9-Dimethyl-6-tosyl-6H-indolo[2,3-b]quinoxaline (5m)**

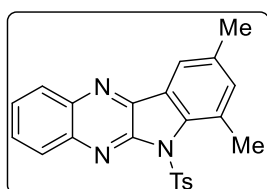

Reaction Time: 1 h; Yield: 74% (0.148 g); Nature of compound: White solid; Melting Point: 244 – 246 °C;  $R_f$ : 0.30 in 30% ethyl acetate in hexanes; IR (KBr):  $\nu$  ( $cm^{-1}$ ) = 3442, 2999, 1648,

1230, 774.  $^1\text{H}$  NMR (400 MHz,  $\text{CDCl}_3$ )  $\delta$  8.20 (d,  $J = 7.6$  Hz, 1H), 8.10 (d,  $J = 8.0$  Hz, 1H), 7.88 (s, 1H), 7.73 (t,  $J = 7.3$  Hz, 2H), 7.76 – 7.69 (m, 2H), 7.33 (s, 1H), 7.02 (d,  $J = 8.0$  Hz, 2H), 2.76 (s, 3H), 2.48 (s, 3H), 2.22 (s, 3H).  $^{13}\text{C}\{^1\text{H}\}$  NMR (100 MHz,  $\text{CDCl}_3$ )  $\delta$  148.9, 144.9, 143.4, 141.1, 140.7, 140.0, 136.5, 136.3, 134.7, 130.3, 129.5, 129.3, 129.2, 129.0, 128.9, 127.9, 126.4, 119.9, 21.9, 21.6, 21.1. HRMS (ESI)  $m/z$ :  $[\text{M}+\text{H}]^+$  Calcd for  $\text{C}_{23}\text{H}_{20}\text{N}_3\text{O}_2\text{S}$  402.1271; Found 402.1292

### 7-Tosyl-7H-benzo[4,5]indolo[2,3-b]quinoxaline (5o)<sup>3</sup>

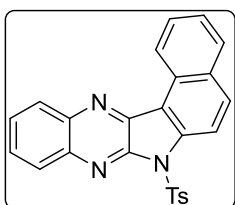

Reaction Time: 40 min; Yield: 89% (0.188 g); Nature of compound: brown solid; Melting Point: 241 – 243 °C;  $R_f$ : 0.30 in 30% ethyl acetate in hexanes; IR (KBr):  $\nu$  ( $\text{cm}^{-1}$ ) = 3435, 3005, 2081, 1638, 1214, 774.  $^1\text{H}$  NMR (700 MHz,  $\text{CDCl}_3$ )  $\delta$  8.93 (d,  $J = 8.4$  Hz, 1H), 8.28 (d,  $J = 8.4$  Hz, 1H), 8.20 (d,  $J = 8.4$  Hz, 1H), 8.15 (d,  $J = 8.4$  Hz, 1H), 7.99 (d,  $J = 7.7$  Hz, 1H), 7.97 (d,  $J = 8.4$  Hz, 1H), 7.79 – 7.76 (m, 2H), 7.71 (d,  $J = 7.7$  Hz, 1H), 7.66 (t,  $J = 7.7$  Hz, 1H), 7.42 (d,  $J = 8.4$  Hz, 2H), 6.91 (d,  $J = 8.4$  Hz, 2H), 2.16 (s, 3H).  $^{13}\text{C}\{^1\text{H}\}$  NMR (175 MHz,  $\text{CDCl}_3$ )  $\delta$  148.6, 145.2, 143.1, 141.4, 141.3, 139.7, 136.3, 133.2, 129.5, 129.3, 129.2, 129.1, 128.9, 128.6, 128.3, 128.0, 127.8, 127.7, 126.5, 125.6, 123.4, 117.9, 21.5. HRMS (ESI)  $m/z$ :  $[\text{M}+\text{H}]^+$  Calcd for  $\text{C}_{25}\text{H}_{18}\text{N}_3\text{O}_2\text{S}$  424.1120; Found 424.1113

### 13-Tosyl-13*H*-benzo[6,7]indolo[2,3-*b*]quinoxaline (5p)<sup>3</sup>

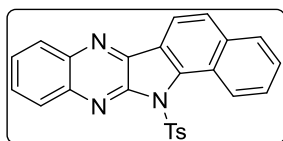

Reaction Time: 40 min; Yield: 83% (0.175 g); Nature of compound: brown solid; Melting Point: 209 – 211 °C; *R*<sub>f</sub>: 0.30 in 30% ethyl acetate in hexanes; IR (KBr):  $\nu$  (cm<sup>-1</sup>) = 3433, 3012, 2075, 1638, 1219, 780. <sup>1</sup>H NMR (400 MHz, CDCl<sub>3</sub>)  $\delta$  9.62 (d, *J* = 8.1 Hz, 1H), 8.73 (d, *J* = 9.1 Hz, 1H), 8.32 (dd, *J* = 8.8, 6.4 Hz, 2H), 8.17 (d, *J* = 9.2 Hz, 1H), 8.12 (d, *J* = 8.3 Hz, 2H), 8.01 (d, *J* = 8.1 Hz, 1H), 7.85 – 7.73 (m, 3H), 7.60 (t, *J* = 7.2 Hz, 1H), 7.18 (d, *J* = 8.2 Hz, 2H), 2.27 (s, 3H). <sup>13</sup>C{<sup>1</sup>H} NMR (100 MHz, CDCl<sub>3</sub>)  $\delta$  145.6, 144.2, 141.4, 141.1, 139.1, 135.3, 133.0, 130.5, 129.7, 129.4, 129.2, 129.1, 128.9 (2C), 128.8, 128.6, 128.4, 127.9, 125.9, 125.2, 115.4, 114.4, 21.6. HRMS (ESI) *m/z*: [M+H]<sup>+</sup> Calcd for C<sub>25</sub>H<sub>18</sub>N<sub>3</sub>O<sub>2</sub>S 424.1120; Found 424.1130

### 2,3-Dichloro-6-tosyl-6*H*-indolo[2,3-*b*]quinoxaline (5q)<sup>3</sup>

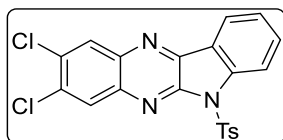

Reaction Time: 1.5 h; Yield: 73% (0.161 g); Nature of compound: White solid; Melting Point: 260 – 262 °C; *R*<sub>f</sub>: 0.30 in 30% ethyl acetate in hexanes; IR (KBr):  $\nu$  (cm<sup>-1</sup>) = 3543, 2351, 1691, 1221, 775. <sup>1</sup>H NMR (400 MHz, CDCl<sub>3</sub>)  $\delta$  8.55 (d, *J* = 8.5 Hz, 1H), 8.41 (s, 1H), 8.36 (d, *J* = 8.4 Hz, 2H), 8.13 (d, *J* = 8.1 Hz, 2H), 7.80 (t, *J* = 7.7 Hz, 1H), 7.55 (t, *J* = 7.3 Hz, 1H), 7.28 (s, 2H), 2.35 (s, 3H). <sup>13</sup>C{<sup>1</sup>H} NMR (100 MHz, CDCl<sub>3</sub>) 145.9, 144.9, 142.1, 141.4, 139.3, 138.7, 135.1, 133.9, 132.8(2C), 129.8, 129.6, 129.5, 127.9, 124.9, 122.8, 121.4, 115.2, 21.7. HRMS (ESI) *m/z*: [M+H]<sup>+</sup> Calcd for C<sub>21</sub>H<sub>14</sub>Cl<sub>2</sub>N<sub>3</sub>O<sub>2</sub>S 442.0184; Found 442.0180

### 2,3-Dichloro-10-methyl-6-tosyl-6H-indolo[2,3-b]quinoxaline (5r)

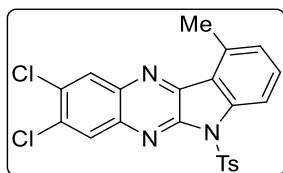

Reaction Time: 1.5 h; Yield: 72% (0.165 g); Nature of compound: White solid; Melting Point: 229 – 231 °C;  $R_f$ : 0.30 in 30% ethyl acetate in hexanes; IR (KBr):  $\nu$  ( $\text{cm}^{-1}$ ) = 3501, 2963, 2375, 1861, 1198, 778.  $^1\text{H}$  NMR (400 MHz,  $\text{CDCl}_3$ )  $\delta$  8.35 (t,  $J = 9.7$  Hz, 3H), 8.09 (d,  $J = 8.3$  Hz, 2H), 7.62 (t,  $J = 8.0$  Hz, 1H), 7.24 – 7.19 (m, 3H), 2.99 (s, 3H), 2.32 (s, 3H).  $^{13}\text{C}\{^1\text{H}\}$  NMR (175 MHz,  $\text{CDCl}_3$ )  $\delta$  145.7, 144.8, 142.8, 142.1, 139.3, 137.9, 137.8, 135.2, 133.6, 132.3, 131.9, 129.9, 129.7, 129.4, 127.9, 126.4, 119.4, 112.3, 21.6, 19.6. HRMS (ESI)  $m/z$ :  $[\text{M}+\text{H}]^+$  Calcd for  $\text{C}_{22}\text{H}_{16}\text{Cl}_2\text{N}_3\text{O}_2\text{S}$  456.0340; Found 456.0323

### 2,3-Dichloro-8-methyl-6-tosyl-6H-indolo[2,3-b]quinoxaline (5s)

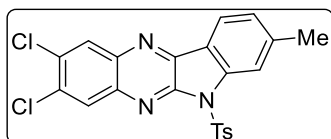

Reaction Time: 1.5 h; Yield: 67% (0.152 g); Nature of compound: White solid; Melting Point: 240 – 242 °C;  $R_f$ : 0.30 in 30% ethyl acetate in hexanes; IR (KBr):  $\nu$  ( $\text{cm}^{-1}$ ) = 3439, 2967, 2297, 1810, 1268, 773.  $^1\text{H}$  NMR (400 MHz,  $\text{CDCl}_3$ )  $\delta$  8.35 (s, 2H), 8.28 (s, 1H), 8.19 (d,  $J = 7.6$  Hz, 1H), 8.13 (d,  $J = 7.6$  Hz, 2H), 7.34 (d,  $J = 8$  Hz, 1H), 7.27 (d,  $J = 8.8$  Hz, 2H), 2.66 (s, 3H), 2.43 (s, 3H).  $^{13}\text{C}\{^1\text{H}\}$  NMR (100 MHz,  $\text{CDCl}_3$ )  $\delta$  145.8, 144.2, 142.5, 141.7, 141.5, 139.2, 138.4, 135.2, 133.5, 132.5, 129.8, 129.5, 129.4, 127.9, 126.2, 122.4, 118.9, 115.4, 22.9, 21.7. HRMS (ESI)  $m/z$ :  $[\text{M}+\text{H}]^+$  Calcd for  $\text{C}_{22}\text{H}_{16}\text{Cl}_2\text{N}_3\text{O}_2\text{S}$  456.0340; Found 456.0336

### 5-Tosyl-5*H*-[1,3]dioxolo[4',5':5,6]indolo[2,3-*b*]quinoxaline (5t)<sup>3</sup>

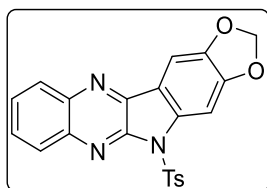

Reaction Time: 40 min; Yield: 79% (0.164 g); Nature of compound: white solid; Melting Point: 243 – 244 °C;  $R_f$ : 0.30 in 30% ethyl acetate in hexanes; IR (KBr):  $\nu$  ( $\text{cm}^{-1}$ ) = 3439, 2963, 2389, 1898, 1253, 772.  $^1\text{H}$  NMR (400 MHz,  $\text{CDCl}_3$ )  $\delta$  8.24 (d,  $J = 7.7$  Hz, 1H), 8.15 (d,  $J = 7.4$  Hz, 1H), 8.06 (d,  $J = 8.0$  Hz, 3H), 7.75 (s, 2H), 7.68 (s, 1H), 7.19 (d,  $J = 7.8$  Hz, 2H), 6.16 (s, 2H), 2.30 (s, 3H).  $^{13}\text{C}\{^1\text{H}\}$  NMR (100 MHz,  $\text{CDCl}_3$ )  $\delta$  151.9, 146.0, 145.7, 144.9, 140.8, 140.6, 139.4, 138.2, 135.2, 129.8, 129.3, 128.9, 128.8, 128.6, 127.9, 115.8, 102.5, 101.0, 97.5, 21.8. HRMS (ESI)  $m/z$ :  $[\text{M}+\text{H}]^+$  Calcd for  $\text{C}_{22}\text{H}_{16}\text{N}_3\text{O}_4\text{S}$  418.0862; Found 418.0874

### 2-((1,1,1,3,3,3-Hexafluoropropan-2-yl)oxy)-5-tosyl-5*H*-[1,3]dioxolo[4',5':5,6]indolo[2,3-*b*]quinoxaline (6t)

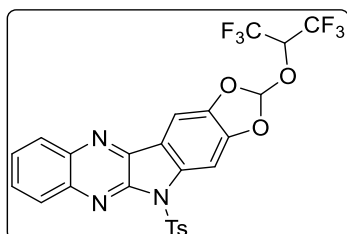

Reaction Time: 40 min; Yield: 78% (0.227 g); Nature of compound: yellow solid; Melting Point: 228 – 230 °C;  $R_f$ : 0.30 in 30% ethyl acetate in hexanes; IR (KBr):  $\nu$  ( $\text{cm}^{-1}$ ) = 3448, 2369, 2078, 1638, 1223, 780.  $^1\text{H}$  NMR (400 MHz,  $\text{CDCl}_3$ )  $\delta$  8.25 (d,  $J = 8.6$  Hz, 2H), 8.17 (d,  $J = 7.9$  Hz, 1H), 8.10 (d,  $J = 8.0$  Hz, 2H), 7.88 (s, 1H), 7.83 – 7.71 (m, 2H), 7.22 (d,  $J = 8.0$  Hz, 2H), 7.14 (s, 1H), 4.68 (dt,  $J = 11.2, 5.5$  Hz, 1H), 2.31 (s, 3H).  $^{13}\text{C}\{^1\text{H}\}$  NMR (100 MHz,  $\text{CDCl}_3$ )  $\delta$  148.2, 145.8, 144.6, 142.6, 140.7, 139.8, 139.5, 138.2, 134.9, 129.7, 129.4, 129.1, 128.9, 128.6, 127.9, 122.1 (q,  $J = 289$ ), 122.0, 118.4, 116.9, 102.2, 98.1, 69.8 (q,  $J = 33.9$  Hz), 21.6.  $^{19}\text{F}$



NMR (377 MHz, CDCl<sub>3</sub>)  $\delta$  -73.37. HRMS (ESI)  $m/z$ : [M+ H]<sup>+</sup> Calcd for C<sub>25</sub>H<sub>16</sub>F<sub>6</sub>N<sub>3</sub>O<sub>5</sub>S 584.0715; Found 584.0709

**8,9-dichloro-2-((1,1,1,3,3,3-hexafluoropropan-2-yl)oxy)-5-tosyl-5H-[1,3]dioxolo[4',5':5,6]indolo[2,3-b]quinoxaline (6u)**

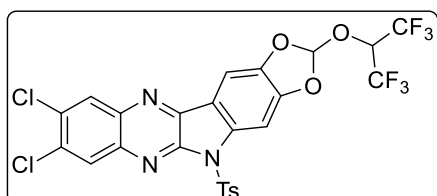

Reaction Time: 40 min; Yield: 48% (0.312 g); Nature of compound: Yellow solid; Melting Point: 248-250 °C; R<sub>f</sub>: 0.30 in 30% ethyl acetate in hexanes; IR (KBr):  $\nu$  (cm<sup>-1</sup>) = 3521, 2823, 2331, 1821, 1297, 783. <sup>1</sup>H NMR (400 MHz, CDCl<sub>3</sub>)  $\delta$  8.35 (s, 1H), 8.27 (s, 1H), 8.24 (s, 1H), 8.09 (d,  $J$  = 8.3 Hz, 2H), 7.86 (s, 1H), 7.27 – 7.25 (m, 2H), 7.15 (s, 1H), 4.69 – 4.64 (m, 1H), 2.34 (s, 3H). <sup>13</sup>C NMR (100 MHz, CDCl<sub>3</sub>)  $\delta$  148.7, 146.1, 144.8, 142.8, 140.7, 139.3, 138.7, 138.1, 134.8, 133.7, 132.9, 129.9, 129.5, 129.4, 127.9, 118.5, 116.3, 102.5, 98.1, 21.7. <sup>19</sup>F NMR (377 MHz, CDCl<sub>3</sub>)  $\delta$  -73.37. HRMS (ESI)  $m/z$ : [M+ H]<sup>+</sup> Calcd for C<sub>25</sub>H<sub>13</sub>C<sub>12</sub>F<sub>6</sub>N<sub>3</sub>O<sub>5</sub>S 651.9935; Found 651.9916

***N*-(4-Iodophenyl)-4-methyl-*N*-(3-(4-(trifluoromethyl)phenyl)quinoxalin-2-yl)benzenesulfonamide (7v)**

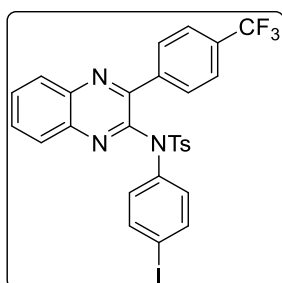

Reaction Time: 1 h; Yield: 49% (0.158 g); Nature of compound: White solid; Melting Point: 173 – 175 °C; R<sub>f</sub>: 0.30 in 30% ethyl acetate in hexanes; IR (KBr):  $\nu$  (cm<sup>-1</sup>) = 3427, 2934, 2366,

1862, 1231, 782.  $^1\text{H}$  NMR (400 MHz,  $\text{CDCl}_3$ )  $\delta$  8.23 – 8.07 (m, 1H), 8.05 – 7.95 (m, 1H), 7.83 – 7.81 (m, 4H), 7.74 – 7.71 (m, 4H), 7.37 (d,  $J = 8.5$  Hz, 2H), 7.30 (d,  $J = 8.1$  Hz, 2H), 6.57 (d,  $J = 8.5$  Hz, 2H), 2.47 (s, 3H).  $^{13}\text{C}\{^1\text{H}\}$  NMR (175 MHz,  $\text{CDCl}_3$ )  $\delta$  151.9, 147.6, 144.3, 141.2, 140.3, 140.1, 138.2, 137.9, 135.8, 131.3 (q,  $J = 34$  Hz), 130.9, 130.8, 130.3, 129.7, 129.4, 129.3, 129.0, 128.6, 125.5 (q,  $J = 270$  Hz), 125.4 (q,  $J = 3.1$  Hz), 93.8, 21.7.  $^{19}\text{F}$  NMR (377 MHz,  $\text{CDCl}_3$ )  $\delta$  -62.8. HRMS (ESI)  $m/z$ :  $[\text{M}+\text{H}]^+$  Calcd for  $\text{C}_{28}\text{H}_{20}\text{F}_3\text{IN}_3\text{O}_2\text{S}$  646.0273; Found 646.0289

***N*-(4-Iodophenyl)-4-methyl-*N*-(3-(2,4,5-trifluorophenyl)quinoxalin-2-yl)benzenesulfonamide (7w)**

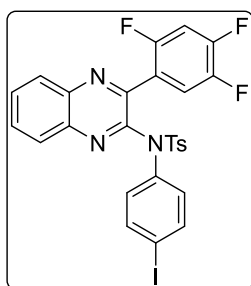

Reaction Time: 1 h; Yield: 42% (0.132 g); Nature of compound: White solid; Melting Point: 219 – 221 °C;  $R_f$ : 0.30 in 30% ethyl acetate in hexanes; IR (KBr):  $\nu$  ( $\text{cm}^{-1}$ ) = 3427, 2934, 2366, 1862, 1231, 782.  $^1\text{H}$  NMR (400 MHz,  $\text{CDCl}_3$ )  $\delta$  8.11 (d,  $J = 7.6$  Hz, 1H), 8.05 – 7.99 (m, 1H), 7.89 – 7.79 (m, 2H), 7.70 (d,  $J = 8.2$  Hz, 2H), 7.45 (d,  $J = 8.5$  Hz, 2H), 7.29 (d,  $J = 8.1$  Hz, 2H), 7.25 – 7.18 (m, 1H), 6.98 (dd,  $J = 15.8, 9.1$  Hz, 1H), 6.16 (d,  $J = 8.5$  Hz, 2H), 2.45 (s, 3H).  $^{13}\text{C}$  NMR (175 MHz,  $\text{CDCl}_3$ )  $\delta$  155.3 (dd,  $J = 251.1, 9.7$  Hz), 150.9 (dd,  $J = 253.9, 11.2$  Hz), 148.1, 147.0, 146.9 (dd,  $J = 246.7, 12.2$  Hz), 144.3, 140.8, 140.4, 138.4, 138.0, 135.6, 131.3, 130.8, 130.1, 129.4, 129.3, 129.0, 128.6, 121.1 (dd,  $J = 22.5, 4.1$  Hz), 119.1 (d,  $J = 21.5$  Hz), 105.9 (dd,  $J = 27.1, 21.0$  Hz), 93.8, 21.7.  $^{19}\text{F}$  NMR (377 MHz,  $\text{CDCl}_3$ )  $\delta$  114.9 (dd,  $J = 14.7$  Hz, 4.5 Hz), 130.6 (dd,  $J = 21.5$  Hz, 5.3 Hz), 141.7 (dd,  $J = 21.0$  MHz, 14.7 Hz). HRMS (ESI)  $m/z$ :  $[\text{M}+\text{H}]^+$  Calcd for  $\text{C}_{27}\text{H}_{18}\text{F}_3\text{IN}_3\text{O}_2\text{S}$  632.0117; Found 632.0105

### Procedure for synthesis of Suzuki coupling reaction of **5d** with phenyl boronic acid<sup>3</sup>:

To a sealed tube containing bis(triphenylphosphine)palladium dichloride (8 mg, 6 mol%), potassium carbonate (0.083 g, 0.6 mmol, 3 equiv), and phenyl boronic acid (0.029 g, 0.24 mmol, 1.2 equiv) in 3:1 dioxane:water as solvent, 8-bromo-6-tosyl-6*H*-indolo[2,3-*b*]quinoxaline **5d** (0.090 g, 0.2 mmol) was added and kept at 100 °C for 24 h. After the completion of the reaction, the reaction mixture was diluted with ethyl acetate, washed with water, brine, and dried over Na<sub>2</sub>SO<sub>4</sub>. The solvent was evaporated and the crude product was purified by flash chromatography on silica gel.

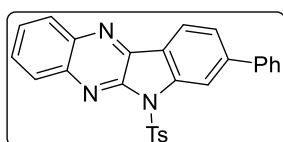

Reaction Time: 24 h; Yield: 78% (0.069 g); Nature of compound: yellow solid; Melting Point: 219 – 220 °C; R<sub>f</sub>: 0.2 in 5% ethyl acetate in hexanes; IR (KBr):  $\nu$  (cm<sup>-1</sup>) = 3427, 2934, 2366, 1862, 1231, 782. <sup>1</sup>H NMR (400 MHz, CDCl<sub>3</sub>)  $\delta$  8.66 – 8.54 (m, 2H), 8.29 (d, *J* = 8.0 Hz, 1H), 8.27 – 8.19 (m, 1H), 8.14 (d, *J* = 8.3 Hz, 2H), 7.98 (dd, *J* = 8.8, 1.7 Hz, 1H), 7.89 – 7.75 (m, 2H), 7.73 (d, *J* = 7.4 Hz, 2H), 7.50 (t, *J* = 7.6 Hz, 2H), 7.41 (d, *J* = 7.4 Hz, 1H), 7.22 (d, *J* = 8.2 Hz, 2H), 2.31 (s, 3H). <sup>13</sup>C{<sup>1</sup>H} NMR (100 MHz, CDCl<sub>3</sub>)  $\delta$  145.6, 145.0, 140.9, 140.7, 140.5, 140.1, 139.9, 138.1, 135.2, 131.1, 129.7, 129.6, 129.2, 129.1, 129.0, 128.5, 127.9, 127.7, 127.3, 122.6, 120.5, 115.5, 21.6. HRMS (ESI) *m/z*: [M+H]<sup>+</sup> Calcd for C<sub>27</sub>H<sub>20</sub>N<sub>3</sub>O<sub>2</sub>S 450.1276; Found 450.1260

### General procedure for Detosylation of **5**

To a mixture of sodium metal (0.023 g, 1 mmol, 2 equiv) in ethanol (2 mL) was added *N*-tosyl indolo[2,3-*b*]quinoxaline **5** (0.5 mmol) and refluxed for 3 hours. After the completion of reaction, the reaction mixture was evaporated. Water was added to the resultant and extracted with EtOAc (3 x 50 mL). The combined organic layers were dried over Na<sub>2</sub>SO<sub>4</sub> and evaporated

under reduced pressure. The crude product is purified in column chromatography using 70% hexane, 30% ethyl acetate and 0.5% triethylamine as eluent.

### 6*H*-Indolo[2,3-*b*]quinoxaline (9a)<sup>3</sup>

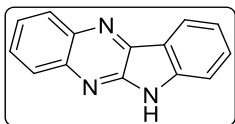

Reaction Time: 3 h; Yield: 84% (0.092 g); Nature of compound: yellow solid; Melting Point: 295-297 °C;  $R_f$ : 0.35 in 30% ethyl acetate in hexanes; IR (KBr):  $\nu$  ( $\text{cm}^{-1}$ ) = 3439, 2951, 2088, 1645, 1227, 775.  $^1\text{H}$  NMR (400 MHz, DMSO)  $\delta$  12.05 (s, 1H), 8.34 (d,  $J = 7.6$  Hz, 1H), 8.24 (d,  $J = 8.2$  Hz, 1H), 8.06 (d,  $J = 8.3$  Hz, 1H), 7.79 (t,  $J = 7.4$  Hz, 1H), 7.70 (dd,  $J = 10.7, 7.9$  Hz, 2H), 7.58 (d,  $J = 8.0$  Hz, 1H), 7.35 (t,  $J = 7.3$  Hz, 1H).  $^{13}\text{C}\{^1\text{H}\}$  NMR (100 MHz, DMSO)  $\delta$  145.9, 144.0, 140.2, 139.8, 138.6, 131.3, 129.1, 128.7, 127.5, 125.9, 122.3, 120.7, 118.9, 112.0. HRMS (ESI)  $m/z$ :  $[\text{M}+\text{H}]^+$  Calcd for  $\text{C}_{14}\text{H}_{10}\text{N}_3$  220.0875; Found 220.0899

### 8-Bromo-6*H*-indolo[2,3-*b*]quinoxaline (9b)<sup>4</sup>

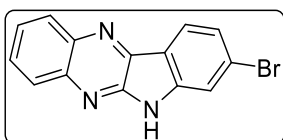

Reaction Time: 3 h; Yield: 72% (0.107 g); Nature of compound: yellow solid; Melting Point: 293 – 295 °C;  $R_f$ : 0.38 in 30% ethyl acetate in hexanes; IR (KBr):  $\nu$  ( $\text{cm}^{-1}$ ) = 3468, 2970, 2094, 1623, 1239, 776.  $^1\text{H}$  NMR (400 MHz, DMSO)  $\delta$  12.24 (s, 1H), 8.46 (d,  $J = 1.9$  Hz, 1H), 8.30 – 8.19 (m, 1H), 8.08 (d,  $J = 8.4$  Hz, 1H), 7.84 - 7.81 (m, 2H), 7.77 – 7.69 (m, 1H), 7.55 (d,  $J = 8.6$  Hz, 1H).  $^{13}\text{C}\{^1\text{H}\}$  NMR (100 MHz, DMSO)  $\delta$  146.5, 143.2, 140.88, 139.2, 139.0, 134.1, 129.7, 129.6, 128.1, 126.8, 124.9, 121.3, 114.6, 113.0. HRMS (ESI)  $m/z$ :  $[\text{M}+\text{H}]^+$  Calcd for  $\text{C}_{14}\text{H}_9\text{BrN}_3$  297.9980 and 299.9980; Found 297.9983 and 299.9991

### 8-Methoxy-6H-indolo[2,3-b]quinoxaline (9f)<sup>5</sup>

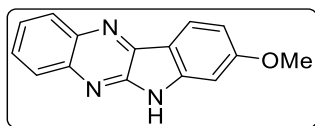

Reaction Time: 3 h; Yield: 87% (0.108 g); Nature of compound: yellow solid; Melting Point: 290 – 292 °C.;  $R_f$ : 0.32 in 30% ethyl acetate in hexanes; IR (KBr):  $\nu$  ( $\text{cm}^{-1}$ ) = 3472, 2979, 2012, 1669, 1229, 770.  $^1\text{H}$  NMR (700 MHz, DMSO)  $\delta$  11.94 (s, 1H), 8.20 (d,  $J$  = 8.5 Hz, 1H), 8.18 (d,  $J$  = 8.9 Hz, 1H), 8.02 (d,  $J$  = 8.2 Hz, 1H), 7.74 (t,  $J$  = 7.5 Hz, 1H), 7.68 (t,  $J$  = 8.1 Hz, 1H), 7.04 (s, 1H), 6.93 (dd,  $J$  = 8.5, 2.0 Hz, 1H), 3.92 (s, 3H).  $^{13}\text{C}\{^1\text{H}\}$  NMR (175 MHz, DMSO)  $\delta$  163.1, 146.7, 146.6, 140.3, 139.7, 139.1, 129.1, 128.4, 127.8, 126.3, 123.9, 112.5, 109.9, 96.3, 56.1. HRMS (ESI)  $m/z$ :  $[\text{M}+\text{H}]^+$  Calcd for  $\text{C}_{15}\text{H}_{12}\text{N}_3\text{O}$  250.0980; Found 250.0955

### 9-Methyl-6H-indolo[2,3-b]quinoxaline (9g)<sup>6</sup>

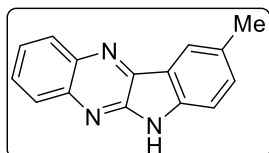

Reaction Time: 3 h; Yield: 67% (0.078 g); Nature of compound: yellow solid; Melting Point: 281 – 283 °C.;  $R_f$ : 0.30 in 30% ethyl acetate in hexanes; IR (KBr):  $\nu$  ( $\text{cm}^{-1}$ ) = 3497, 2997, 2123, 1639, 1297, 781.  $^1\text{H}$  NMR (700 MHz, DMSO)  $\delta$  11.89 (s, 1H), 8.22 (d,  $J$  = 8.3 Hz, 1H), 8.14 (s, 1H), 8.05 (d,  $J$  = 8.3 Hz, 1H), 7.78 (t,  $J$  = 7.5 Hz, 1H), 7.70 (t,  $J$  = 7.5 Hz, 1H), 7.52 (d,  $J$  = 8.1 Hz, 1H), 7.47 (d,  $J$  = 8.1 Hz, 1H), 2.50 (s, 3H).  $^{13}\text{C}\{^1\text{H}\}$  NMR (175 MHz, DMSO)  $\delta$  146.0, 142.1, 140.1, 139.7, 138.5, 132.5, 129.7, 129.0, 128.6, 127.4, 125.8, 121.9, 119.0, 111.7, 20.8. HRMS (ESI)  $m/z$ :  $[\text{M}+\text{H}]^+$  Calcd for  $\text{C}_{15}\text{H}_{12}\text{N}_3$  234.1031; Found 234.1050

### Procedure for Chan-Lam coupling of **9a** with phenyl boronic acid<sup>7</sup>

In a 10 mL Schlenk tube, 6H-indolo[2,3-*b*]quinoxaline **9a** (0.088g, 0.4 mmol, 1.0 equiv) and phenylboronic acid (0.055g, 0.45 mmol, 1.5 equiv) were dissolved in a mixed solvent of anhydrous DMF and anhydrous acetonitrile (1:1) (2.2 mL). Anhydrous copper acetate (0.108g, 0.6 mmol, 1.5 equiv), cesium carbonate (0.130g, 0.4 mmol, 1.0 equiv) and pyridine (0.095g, 1.2 mmol, 3.0 equiv) were added to the mixture. The mixture was stirred at 110 °C oil bath for 24 h under oxygen. The reaction mixture was cooled to room temperature and quenched with saturated NH<sub>4</sub>Cl solution, an appropriate amount of water was added and extracted for three times with ethyl acetate. The combined organic layers were washed with saturated brine, dried over Na<sub>2</sub>SO<sub>4</sub>, filtered, concentrated under reduced pressure, and purified by column chromatography to afford the product.

### 6-Phenyl-6H-indolo[2,3-*b*]quinoxaline **10a**

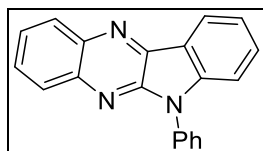

Reaction Time: 24 h; Yield: 50% (0.060 g); Nature of compound: pale yellow solid; Melting Point: 231 - 233 °C; R<sub>f</sub>: 0.2 in 3% ethyl acetate in hexanes. <sup>1</sup>H NMR (400 MHz, CDCl<sub>3</sub>) δ 8.55 (d, *J* = 7.7 Hz, 1H), 8.40 – 8.25 (m, 1H), 8.16 – 8.03 (m, 1H), 7.83 – 7.60 (m, 7H), 7.53 (t, *J* = 8.1 Hz, 2H), 7.45 (t, *J* = 7.5 Hz, 1H). <sup>13</sup>C NMR (100 MHz, CDCl<sub>3</sub>) δ 145.86, 144.74, 140.58, 140.19, 139.79, 135.39, 131.07, 129.81, 129.25, 128.86, 128.24, 128.02, 127.17, 126.54, 122.71, 121.88, 119.83, 110.63. HRMS (ESI) *m/z*: [M+H]<sup>+</sup> Calcd for C<sub>20</sub>H<sub>14</sub>N<sub>3</sub> 296.1188; Found 296.1196

**Procedure for synthesis of target molecule 6,6'-(9-(*p*-tolyl)-9*H*-carbazole-3,6-diyl)bis(6*H*-indolo[2,3-*b*]quinoxaline) 12<sup>8</sup>**

To a solution of 6*H*-indolo[2,3-*b*]quinoxaline **9a** (0.241 g, 1.1 mmol, 2.2 equiv) and 3,6-diiodo-9-(*p*-tolyl)-9*H*-carbazole **11** (0.254 g, 0.5 mmol) in dioxane in sealed tube, potassium phosphate (0.143 g, 1 mmol, 2.1 equiv), CuI (0.019 g, 10 mol%) and *trans*-1,2-DACH (0.023 g, 20 mol%) were added. The mixture was stirred at 110 °C for 48 h. After the completion of the reaction, the reaction mixture was diluted with ethyl acetate, washed with water, brine, and dried over Na<sub>2</sub>SO<sub>4</sub>. The solvent was evaporated and the crude product was purified by flash chromatography on silica gel.

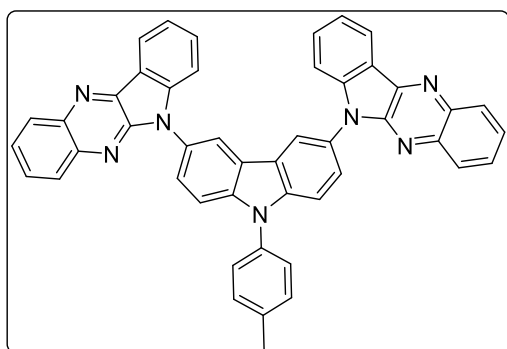

Reaction Time: 48 h; Yield: 64% (0.220 g); Nature of compound: yellow solid; Melting Point: 227 – 229 °C; R<sub>f</sub>: 0.23 in 20% ethyl acetate in hexanes. <sup>1</sup>H NMR (400 MHz, CDCl<sub>3</sub>) δ 8.58 (d, *J* = 7.6 Hz, 2H), 8.47 (s, 1H), 8.35 (d, *J* = 7.4 Hz, 2H), 8.11 (d, *J* = 7.3 Hz, 2H), 7.78 – 7.62 (m, 12H), 7.54 - 7.52 (m, 4H), 7.46 (t, *J* = 7.4 Hz, 2H), 7.28 (s, 1H), 2.58 (s, 3H). <sup>13</sup>C{<sup>1</sup>H} NMR (100 MHz, CDCl<sub>3</sub>) δ 146.6, 145.9, 141.4, 140.8, 140.4, 139.9, 138.5, 134.5, 131.2, 131.0, 129.4, 128.9, 128.4, 127.9, 127.3, 126.5, 126.2, 124.0, 122.8, 121.8, 120.2, 119.8, 111.6, 110.7, 21.5.

### X-Ray crystal data for 5a

|                                             |                                                                 |
|---------------------------------------------|-----------------------------------------------------------------|
| Identification code                         | VS_900                                                          |
| Empirical formula                           | C <sub>21</sub> H <sub>15</sub> N <sub>3</sub> O <sub>2</sub> S |
| Formula weight                              | 373.42                                                          |
| Temperature/K                               | 100.01(10)                                                      |
| Crystal system                              | monoclinic                                                      |
| Space group                                 | P2 <sub>1</sub> /c                                              |
| a/Å                                         | 7.9867(2)                                                       |
| b/Å                                         | 18.9604(5)                                                      |
| c/Å                                         | 11.5410(3)                                                      |
| α/°                                         | 90                                                              |
| β/°                                         | 98.527(2)                                                       |
| γ/°                                         | 90                                                              |
| Volume/Å <sup>3</sup>                       | 1728.35(8)                                                      |
| Z                                           | 4                                                               |
| ρ <sub>calc</sub> /cm <sup>3</sup>          | 1.435                                                           |
| μ/mm <sup>-1</sup>                          | 0.210                                                           |
| F(000)                                      | 776.0                                                           |
| Crystal size/mm <sup>3</sup>                | 0.19 × 0.15 × 0.1                                               |
| Radiation                                   | Mo Kα (λ = 0.71073)                                             |
| 2θ range for data collection/°              | 7.032 to 63.844                                                 |
| Index ranges                                | -11 ≤ h ≤ 11, -24 ≤ k ≤ 27, -16 ≤ l ≤ 14                        |
| Reflections collected                       | 19476                                                           |
| Independent reflections                     | 4989 [R <sub>int</sub> = 0.0272, R <sub>sigma</sub> = 0.0207]   |
| Data/restraints/parameters                  | 4989/0/245                                                      |
| Goodness-of-fit on F <sup>2</sup>           | 1.037                                                           |
| Final R indexes [I >= 2σ (I)]               | R <sub>1</sub> = 0.0375, wR <sub>2</sub> = 0.0970               |
| Final R indexes [all data]                  | R <sub>1</sub> = 0.0438, wR <sub>2</sub> = 0.1010               |
| Largest diff. peak/hole / e Å <sup>-3</sup> | 0.49/-0.37                                                      |



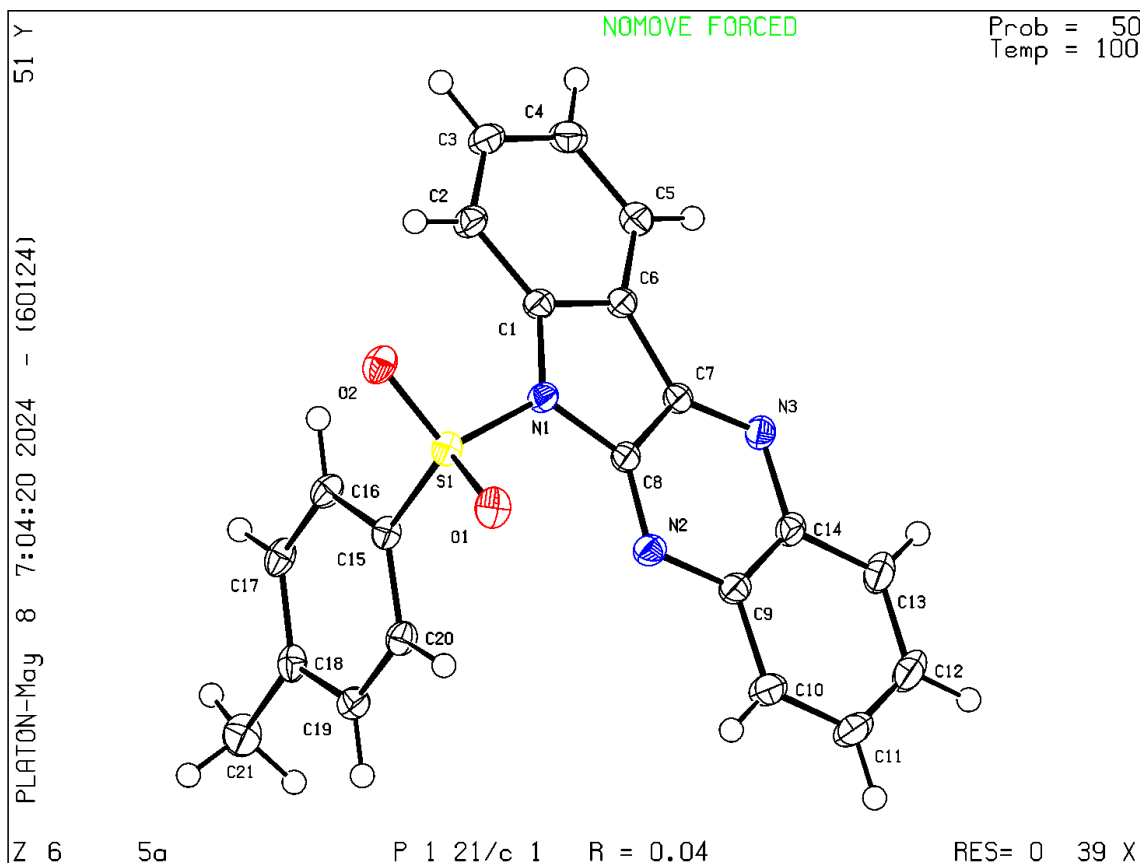

**Figure S-1:** Crystal structure of **5a**. ORTEP Views of the Molecular Structure with Thermal Ellipsoids Set at 50% Probability. X-Ray quality crystals were grown in CH<sub>2</sub>Cl<sub>2</sub>-Hexane solvent system

## X-Ray crystal data for 6t

|                                             |                                                                                |
|---------------------------------------------|--------------------------------------------------------------------------------|
| Identification code                         | SP_VS_968_auto                                                                 |
| Empirical formula                           | C <sub>25</sub> H <sub>15</sub> F <sub>6</sub> N <sub>3</sub> O <sub>5</sub> S |
| Formula weight                              | 583.471                                                                        |
| Temperature/K                               | 298.0(7)                                                                       |
| Crystal system                              | triclinic                                                                      |
| Space group                                 | P-1                                                                            |
| a/Å                                         | 7.2215(2)                                                                      |
| b/Å                                         | 10.8817(3)                                                                     |
| c/Å                                         | 16.0374(6)                                                                     |
| α/°                                         | 106.334(3)                                                                     |
| β/°                                         | 92.084(3)                                                                      |
| γ/°                                         | 95.137(2)                                                                      |
| Volume/Å <sup>3</sup>                       | 1202.03(7)                                                                     |
| Z                                           | 2                                                                              |
| ρ <sub>calc</sub> /cm <sup>3</sup>          | 1.612                                                                          |
| μ/mm <sup>-1</sup>                          | 2.039                                                                          |
| F(000)                                      | 595.3                                                                          |
| Crystal size/mm <sup>3</sup>                | 0.23 × 0.19 × 0.09                                                             |
| Radiation                                   | Cu Kα (λ = 1.54184)                                                            |
| 2θ range for data collection/°              | 8.52 to 158.94                                                                 |
| Index ranges                                | -7 ≤ h ≤ 9, -13 ≤ k ≤ 13, -20 ≤ l ≤ 20                                         |
| Reflections collected                       | 17841                                                                          |
| Independent reflections                     | 5026 [R <sub>int</sub> = 0.0397, R <sub>sigma</sub> = 0.0277]                  |
| Data/restraints/parameters                  | 5026/0/362                                                                     |
| Goodness-of-fit on F <sup>2</sup>           | 1.009                                                                          |
| Final R indexes [I ≥ 2σ (I)]                | R <sub>1</sub> = 0.0610, wR <sub>2</sub> = 0.1671                              |
| Final R indexes [all data]                  | R <sub>1</sub> = 0.0667, wR <sub>2</sub> = 0.1848                              |
| Largest diff. peak/hole / e Å <sup>-3</sup> | 0.96/-1.14                                                                     |

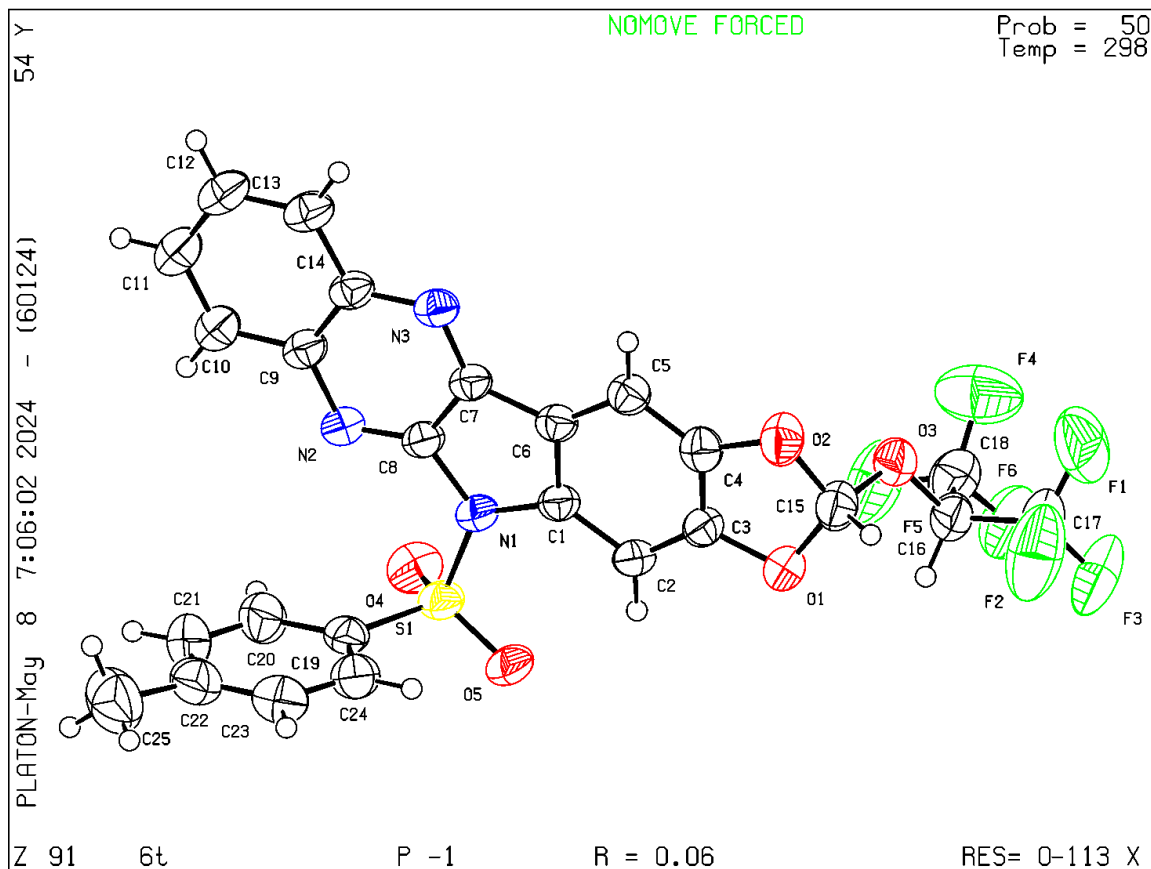

**Figure S-2:** Crystal structure of **6t**. ORTEP Views of the Molecular Structure with Thermal Ellipsoids Set at 50% Probability. X-Ray quality crystals were grown in CH<sub>2</sub>Cl<sub>2</sub>-Hexane solvent system

## References:

1. Y. H. Cho, K. H. Kim and C. H. Cheon, *J. Org. Chem.*, 2014, **79**, 901-907.
2. S. K. Guchhait, G. Priyadarshani and N. M. Gulghane, *RSC Adv.*, 2016, **6**, 56056-56063.
3. S. Laru, S. Bhattacharjee, S. Ghosh and A. Hajra, *Org. Lett.*, 2021, **23**, 7624-7629.
4. A. J. Payne and G. C. Welch, *Org. Biomol. Chem.*, 2017, **15**, 3310-3319.
5. S. D. Carter and G. W. H. Cheeseman, *Tetrahedron*, 1978, **34**, 981-988.
6. R. Dowlatabadi, Khalaj, A., Rahimian, S., Montazeri, M., Amini, M., Shahverdi, A. and Mahjub, E., *Synth. Commun.*, 2011, **41**, 1650-1658.
7. Z. Luo, B. Cao, T. Song, Z. Xing, J. Ren and Z. Wang, *J. Org. Chem.*, 2022, **87**, 15511-15529.
8. T. H. Su, Fan, C.H., Ou-Yang, Y.H., Hsu, L.C. and Cheng, C.H., *J. Mater. Chem. C.*, 2013, **1**, 5084-5092.

# $^1\text{H}$ and $^{13}\text{C}$ Spectra copies

## 3-Phenylquinoxalin-2-amine (3a)

$^1\text{H}$  NMR (400 MHz, DMSO)

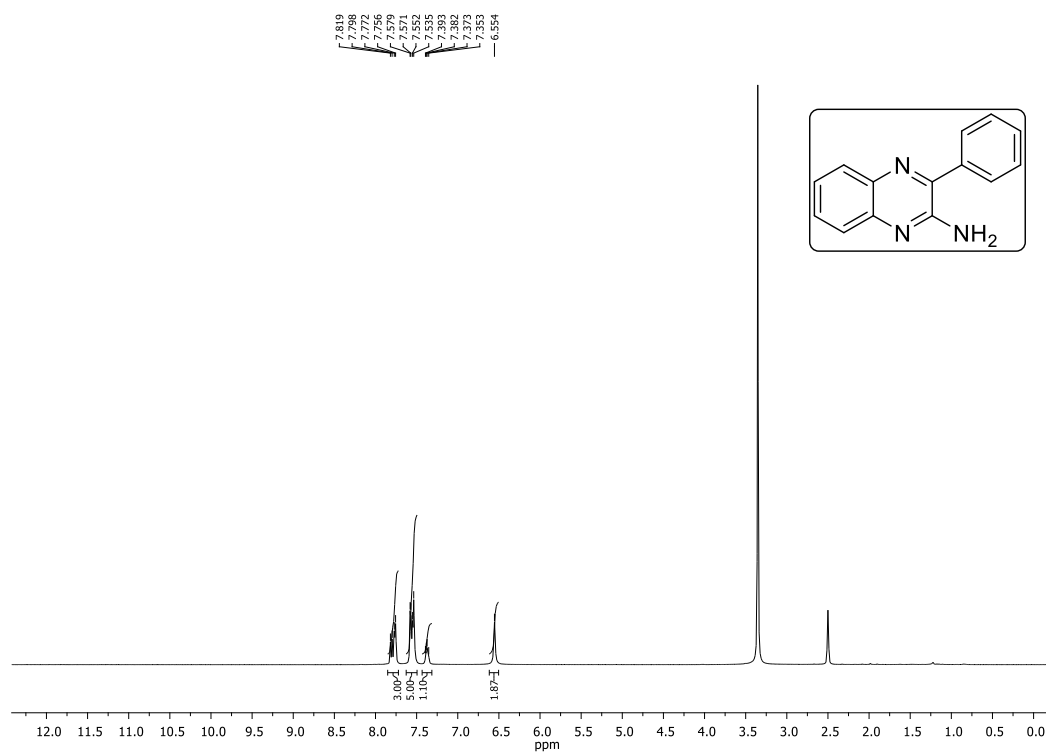

$^{13}\text{C}\{^1\text{H}\}$  NMR (100 MHz, DMSO)

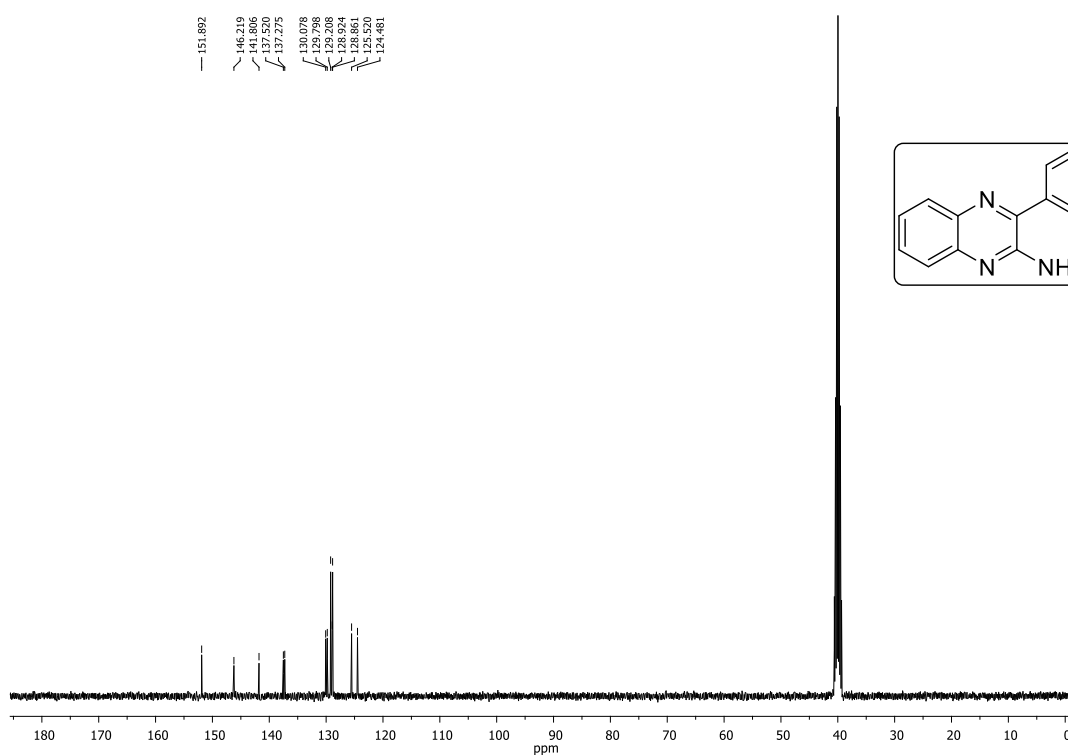

### 3-(4-Fluorophenyl)quinoxalin-2-amine (3b)

$^1\text{H}$  NMR (400 MHz, DMSO)

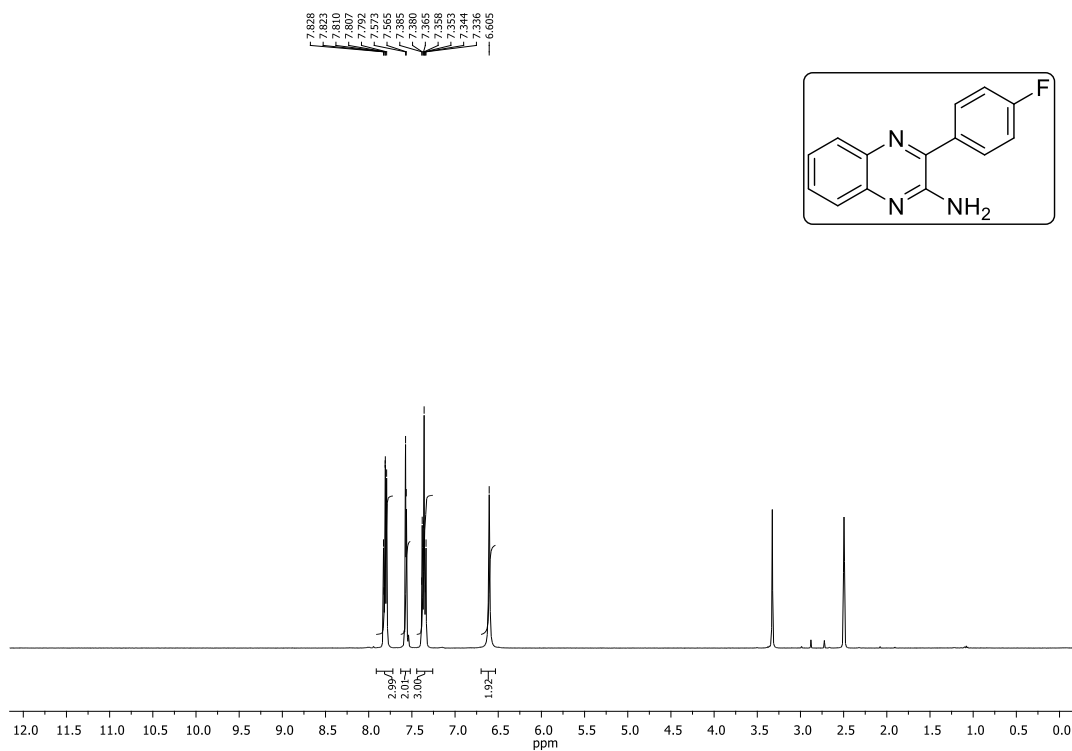

$^{13}\text{C}\{^1\text{H}\}$  NMR (100 MHz, DMSO)

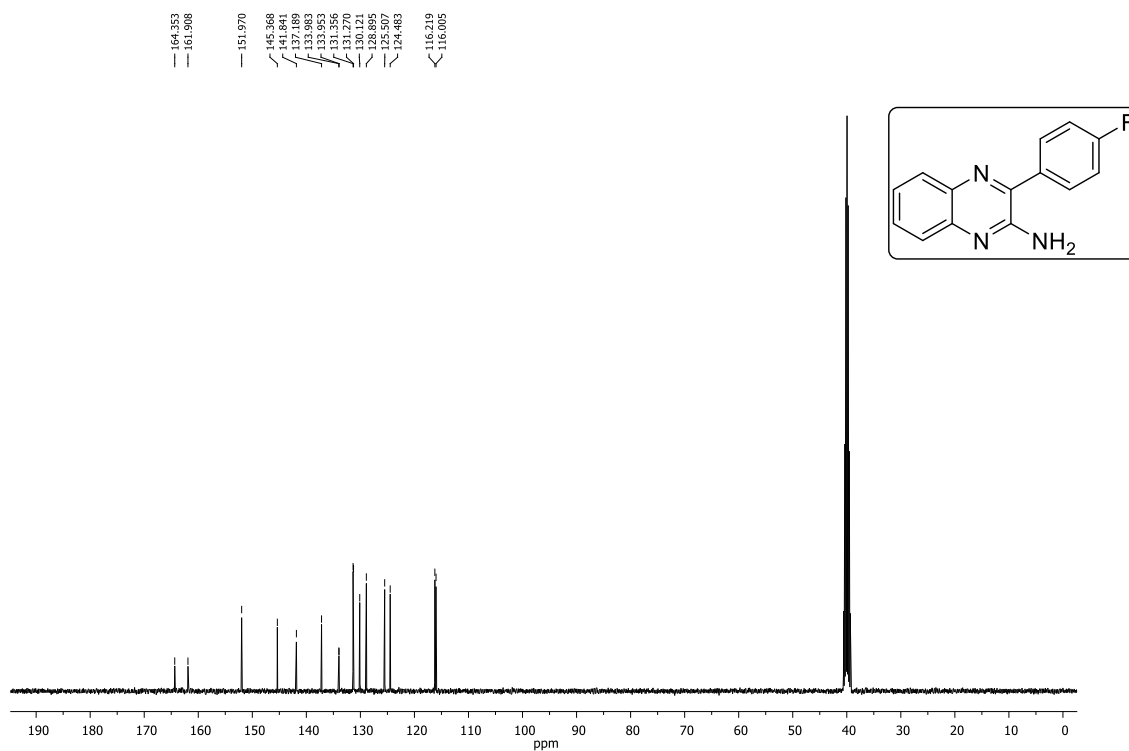

### 3-(4-Chlorophenyl)quinoxalin-2-amine (3c)

$^1\text{H}$  NMR (400 MHz, DMSO)

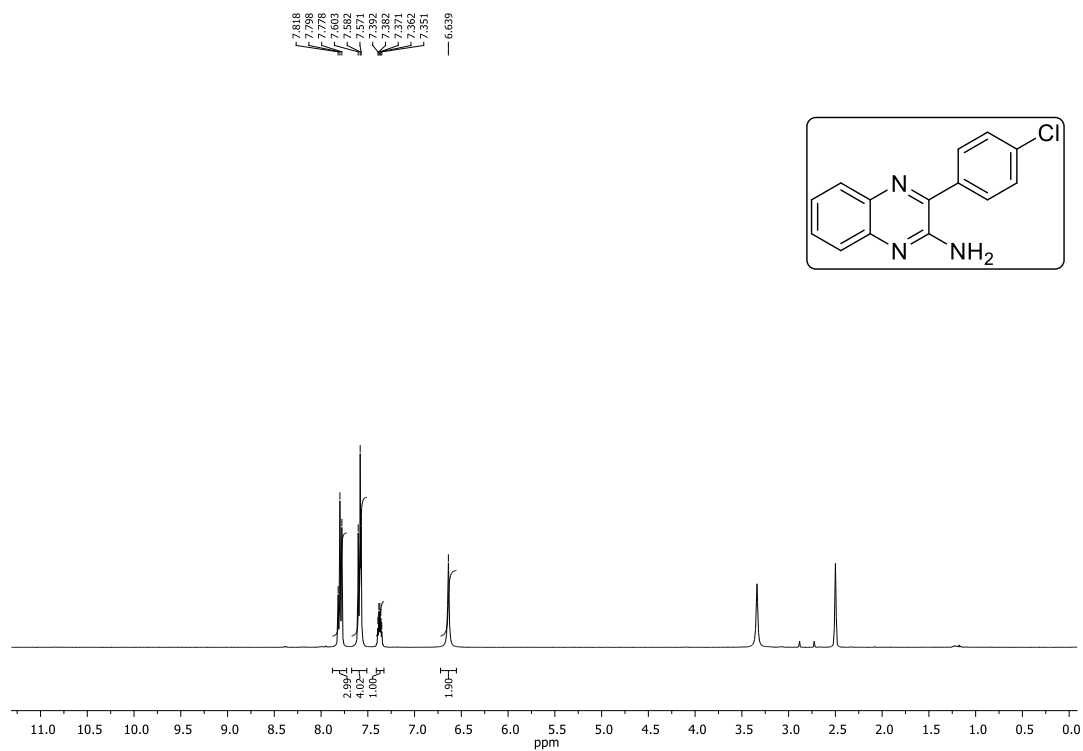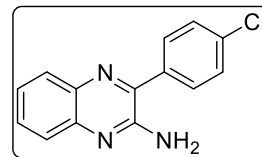

$^{13}\text{C}\{^1\text{H}\}$  NMR (100 MHz, DMSO)

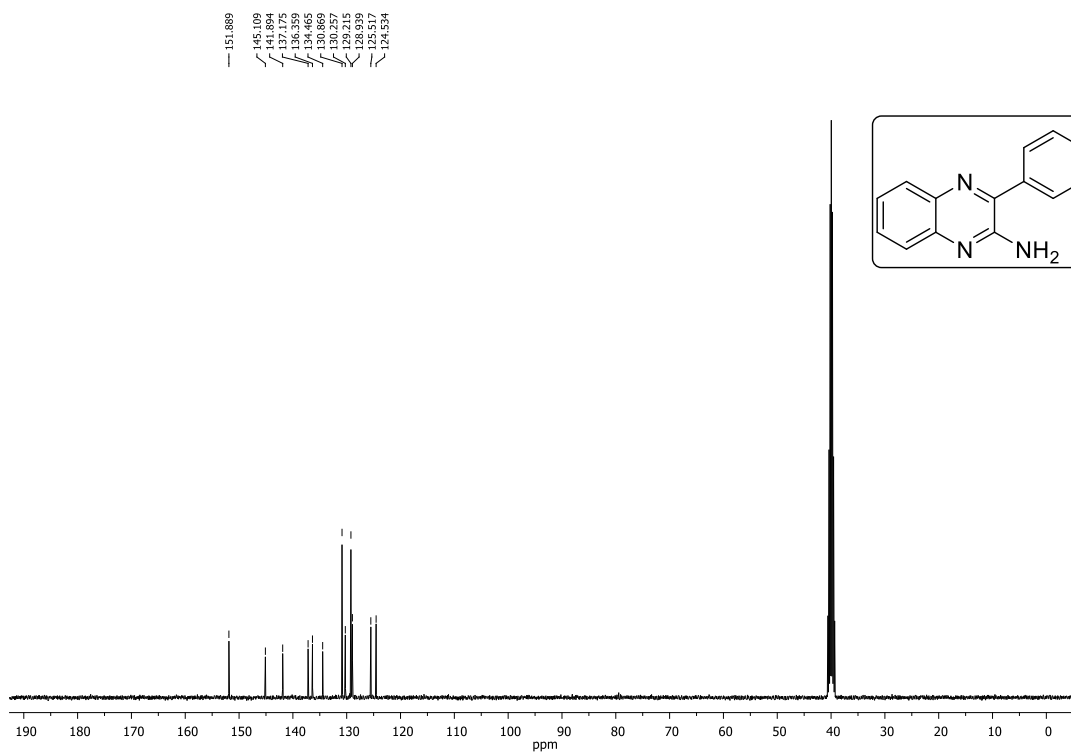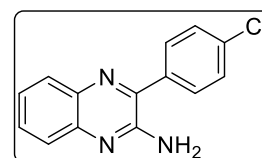

### 3-(4-Bromophenyl)quinoxalin-2-amine (3d)

$^1\text{H}$  NMR (400 MHz, DMSO)

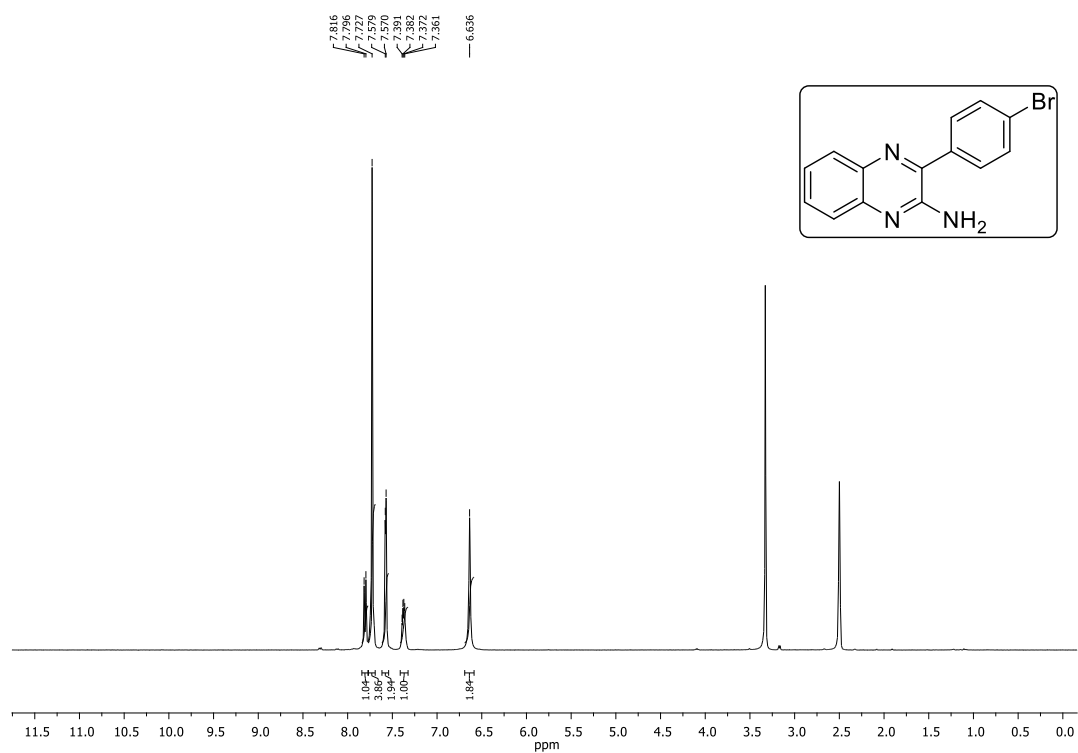

$^{13}\text{C}\{^1\text{H}\}$  NMR (100 MHz, DMSO)

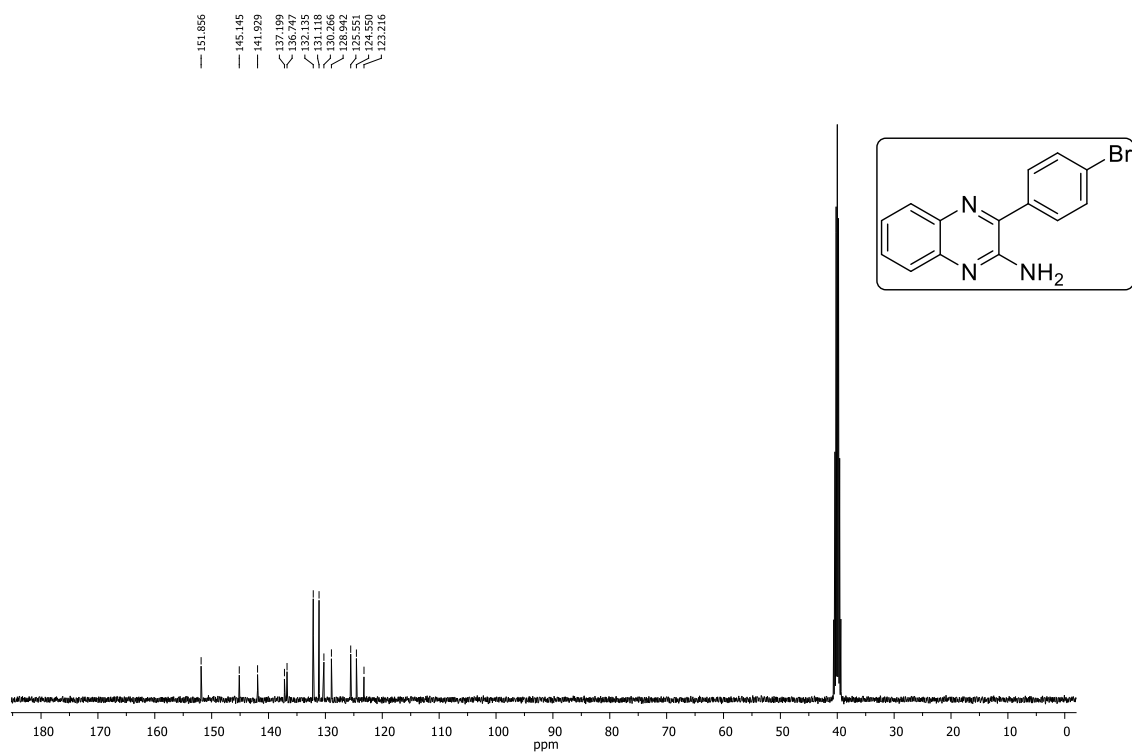



### 3-(*p*-Tolyl)quinoxalin-2-amine (3e)

$^1\text{H}$  NMR (400 MHz, DMSO)

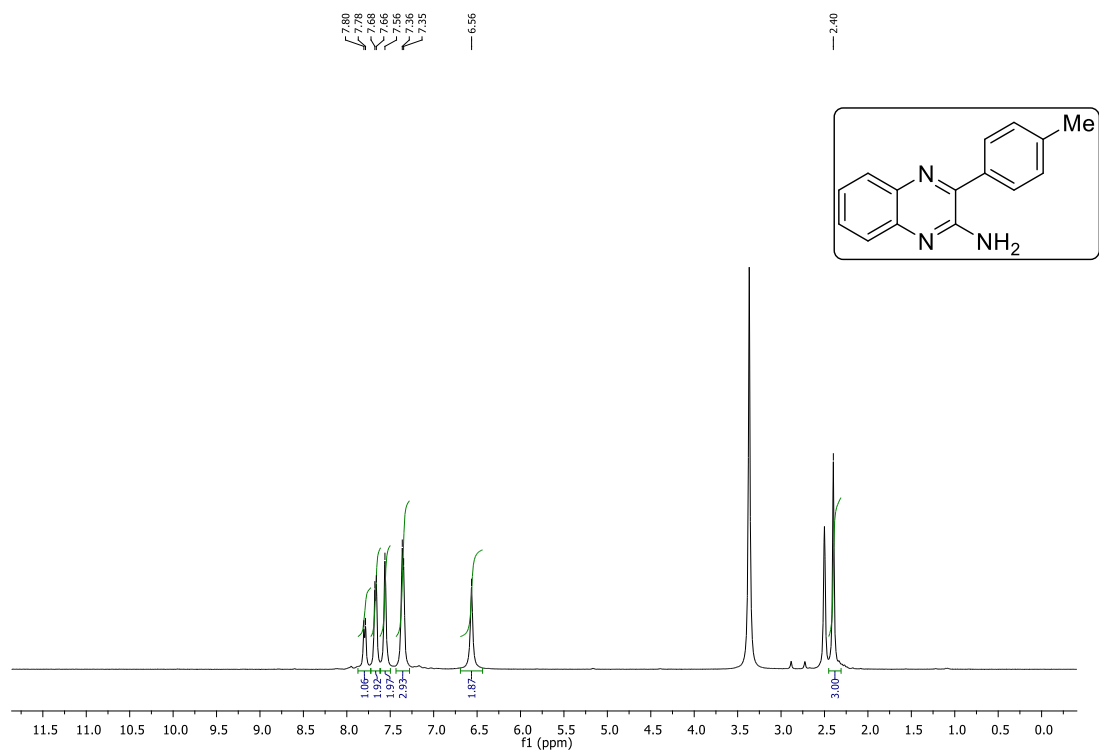

$^{13}\text{C}\{^1\text{H}\}$  NMR (100 MHz, DMSO)

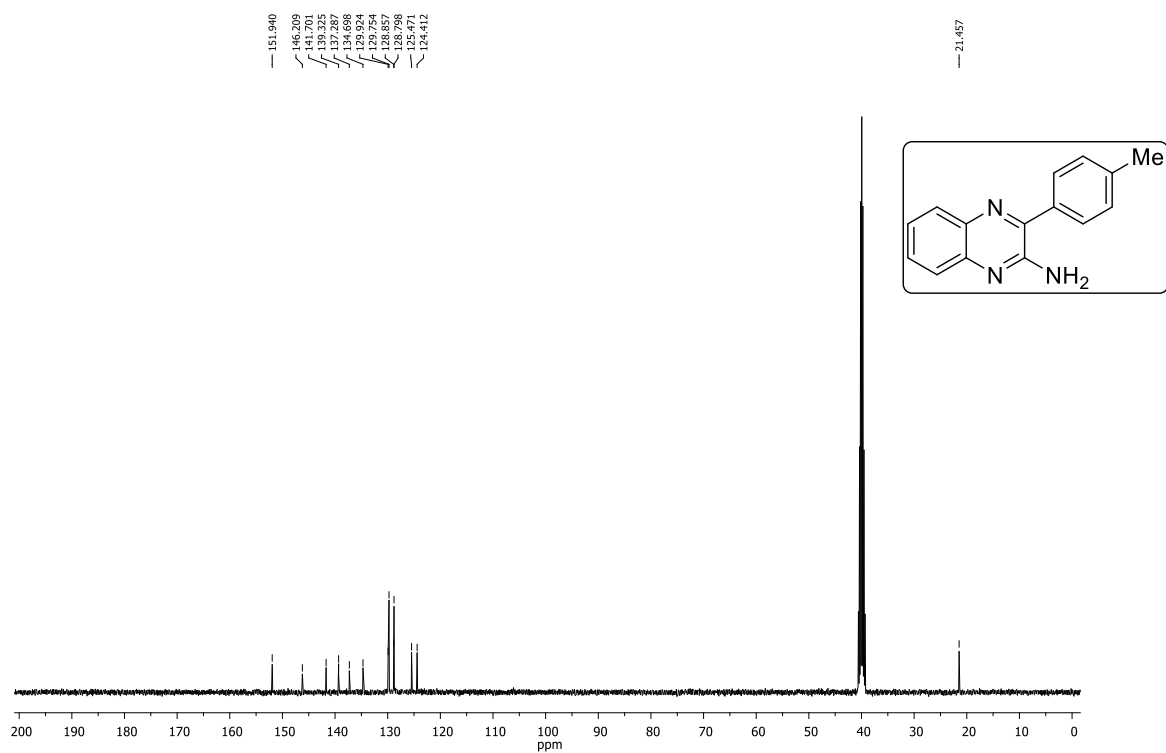

### 3-(4-Methoxyphenyl)quinoxalin-2-amine (3f)

$^1\text{H}$  NMR (400 MHz, DMSO)

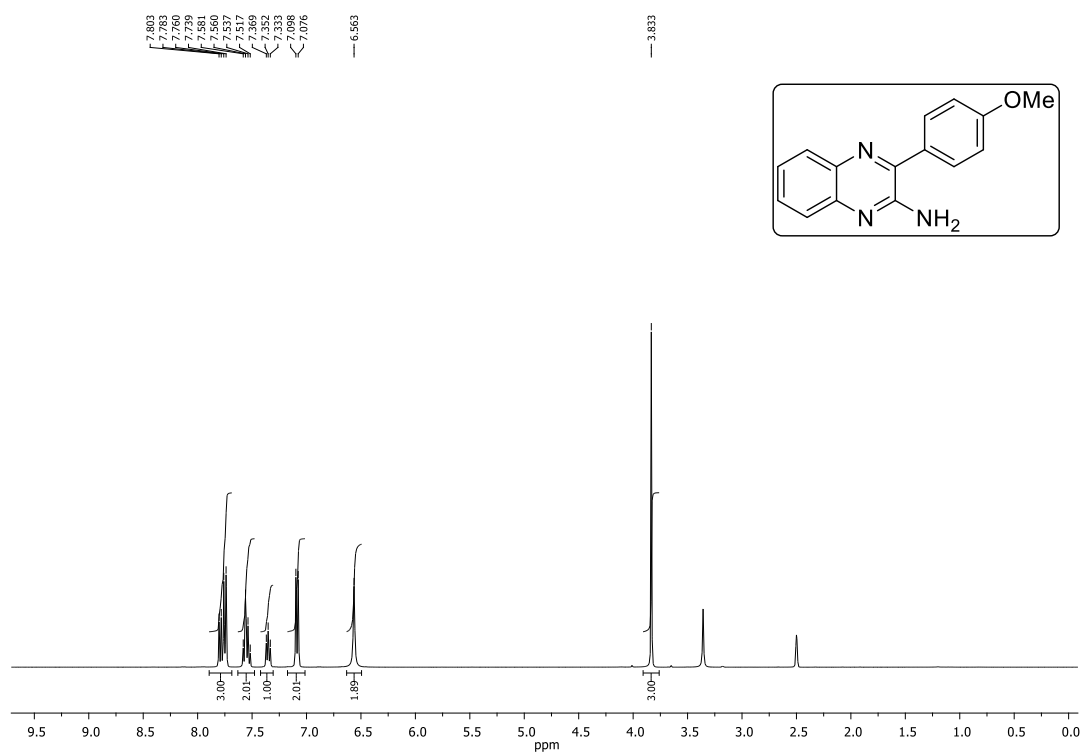

$^{13}\text{C}\{^1\text{H}\}$  NMR (100 MHz, DMSO)

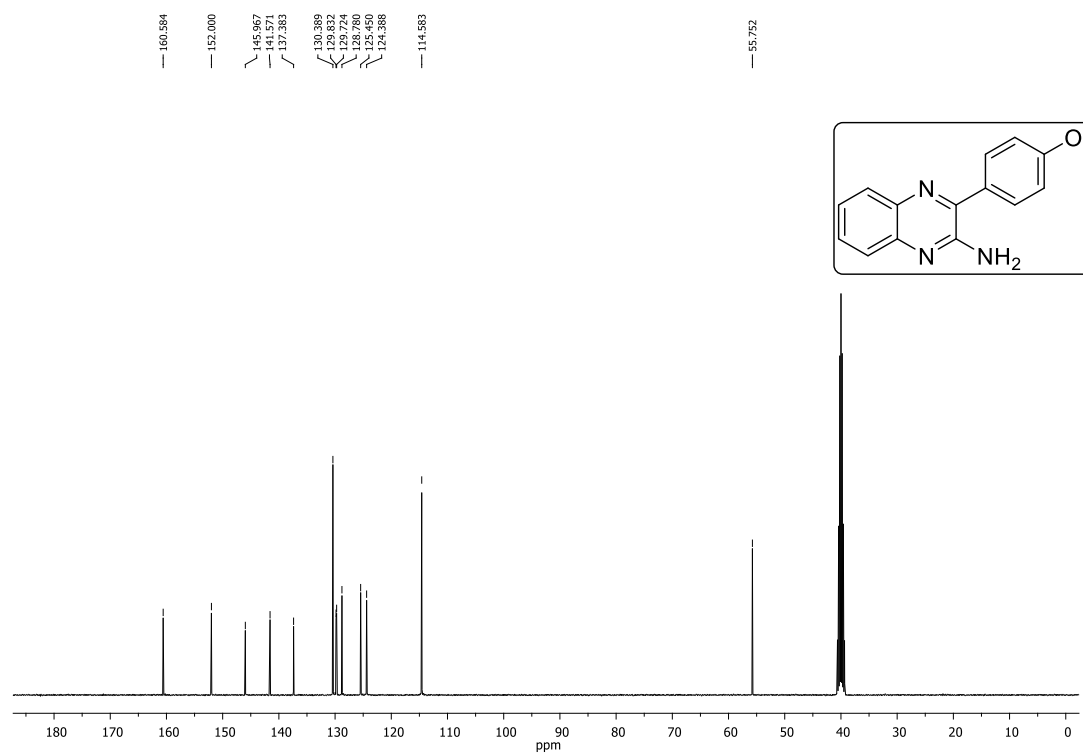

### 3-(2-Chlorophenyl)quinoxalin-2-amine (3g)

$^1\text{H}$  NMR (400 MHz, DMSO)

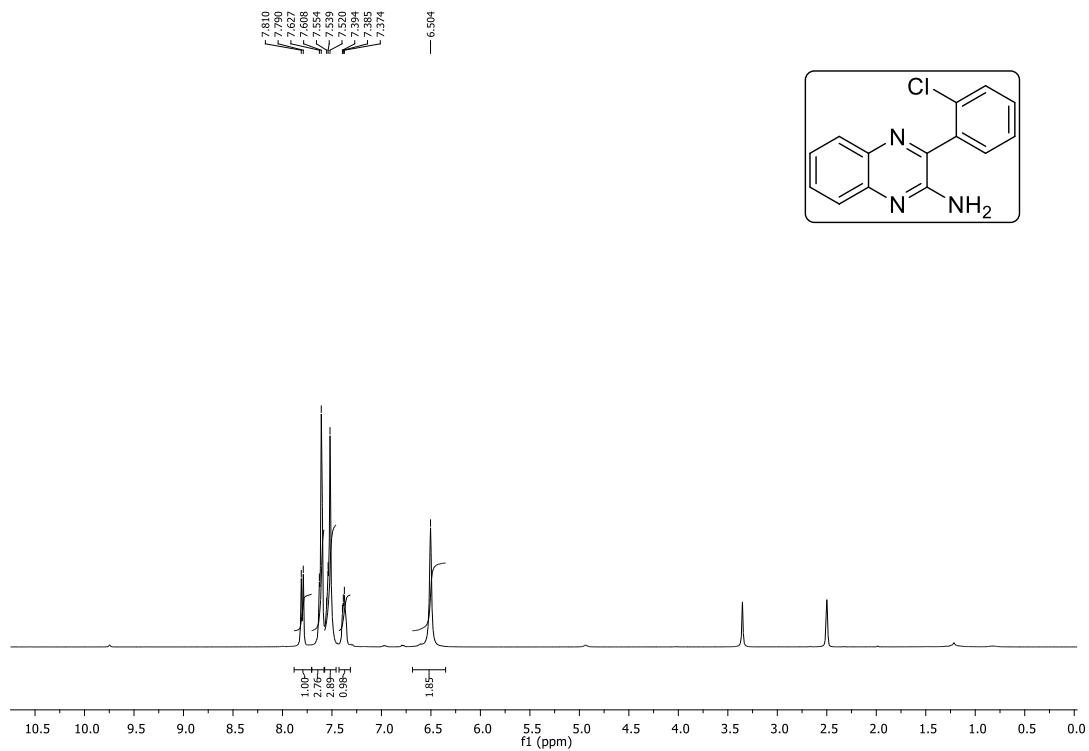

$^{13}\text{C}\{^1\text{H}\}$  NMR (100 MHz, DMSO)

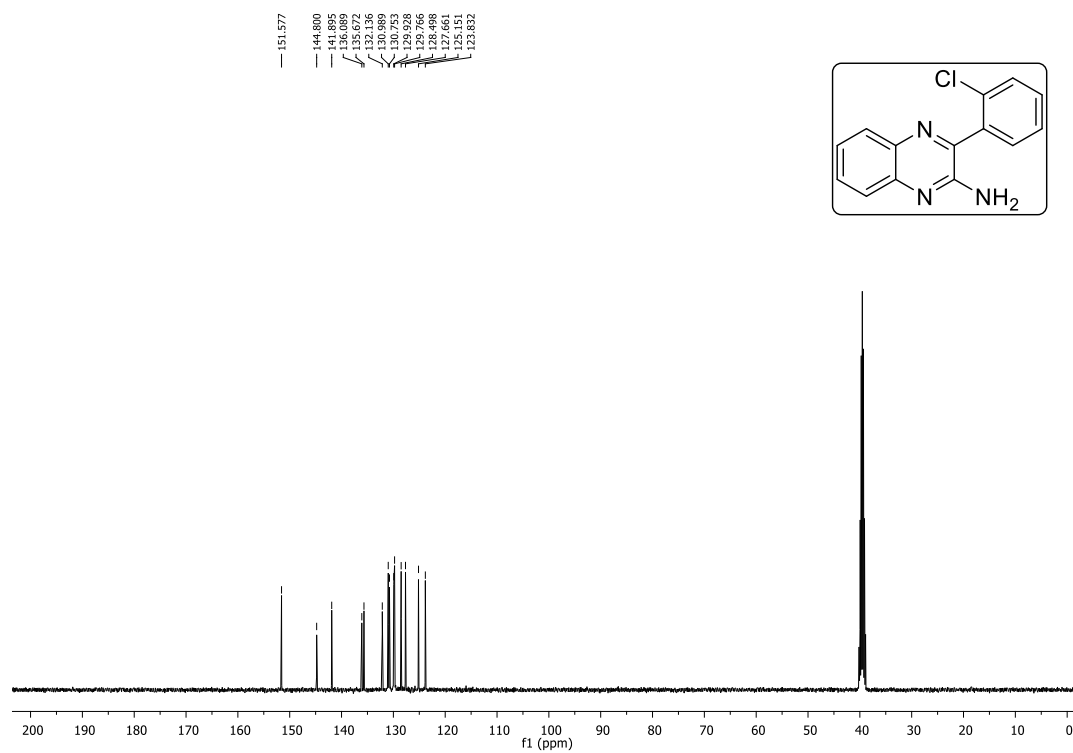

### 3-(*o*-Tolyl)quinoxalin-2-amine (3h)

$^1\text{H}$  NMR (400 MHz, DMSO)

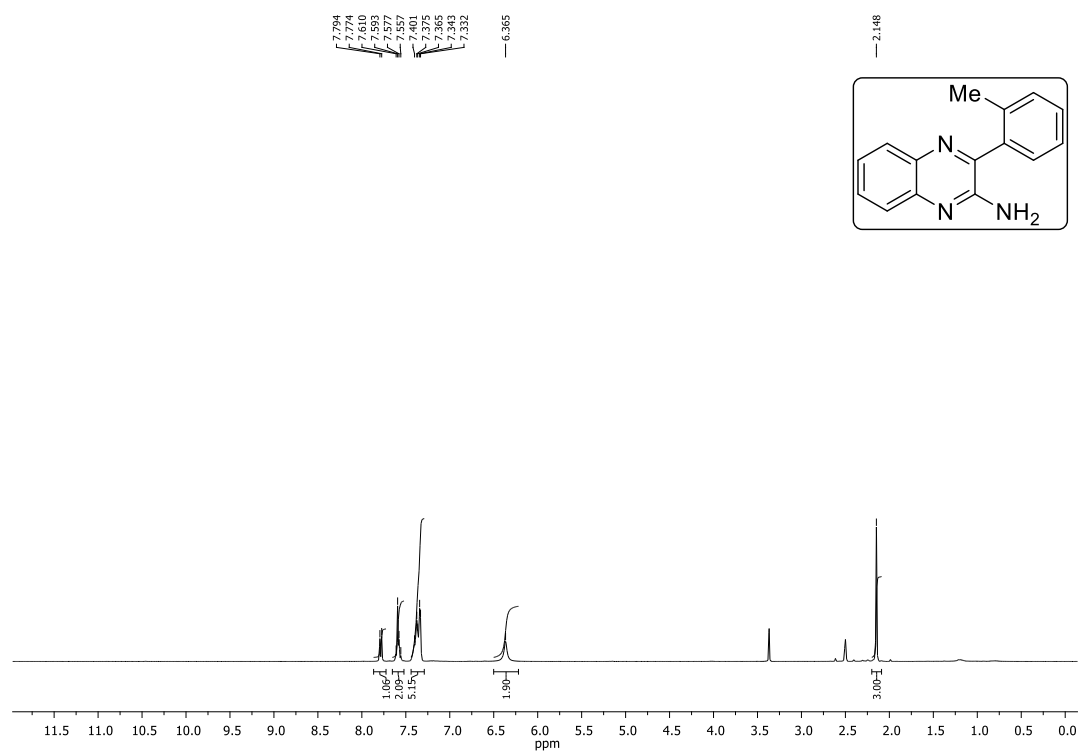

$^{13}\text{C}\{^1\text{H}\}$  NMR (100 MHz, DMSO)

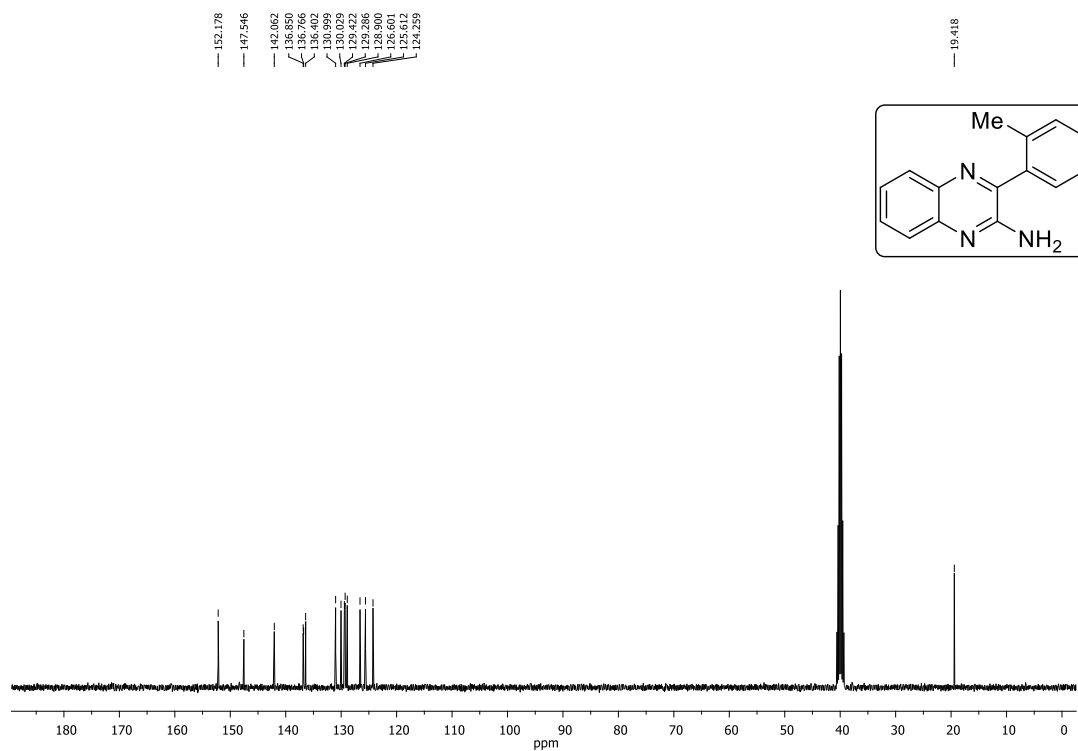

### 3-(2-Methoxyphenyl)quinoxalin-2-amine (3i)

$^1\text{H}$  NMR (400 MHz, DMSO)

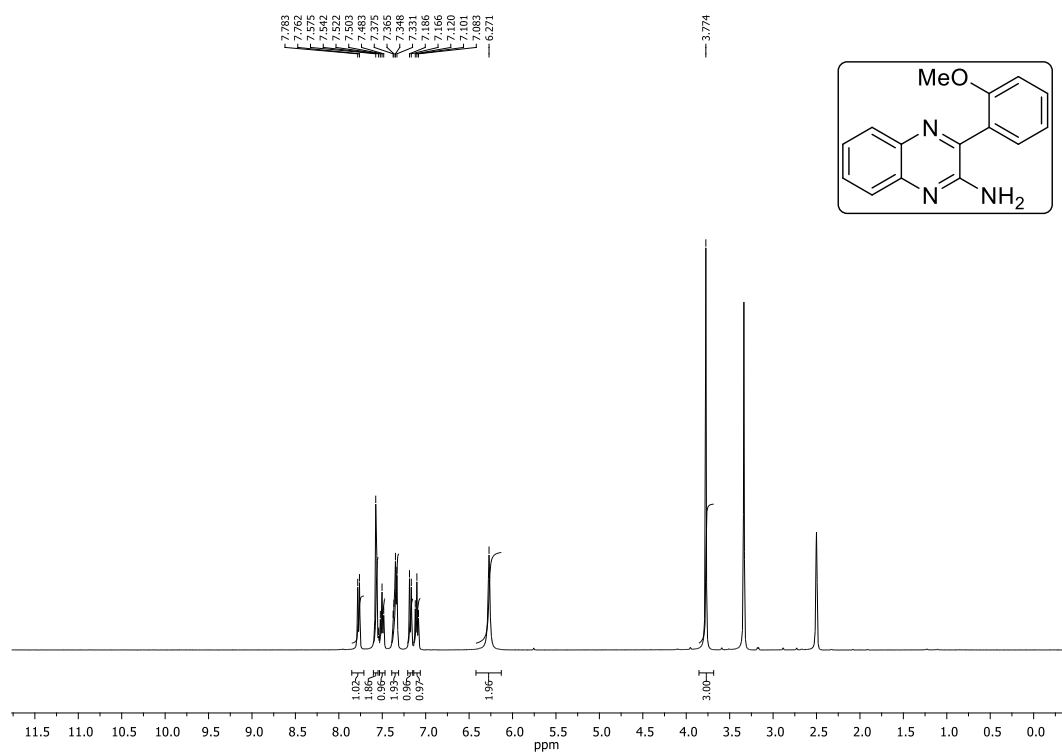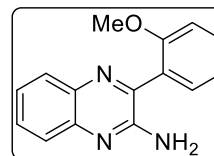

$^{13}\text{C}\{^1\text{H}\}$  NMR (100 MHz, DMSO)

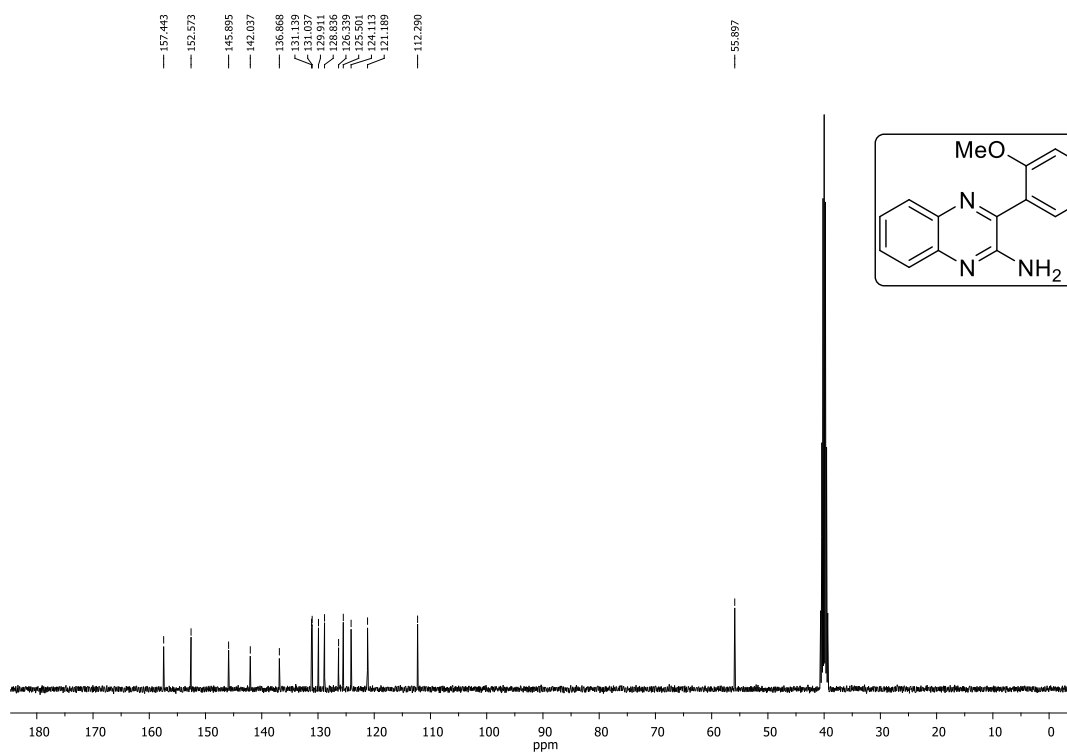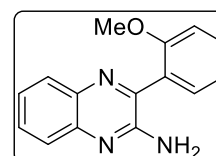

### 3-(3-Fluorophenyl)quinoxalin-2-amine (3j)

$^1\text{H}$  NMR (400 MHz, DMSO)

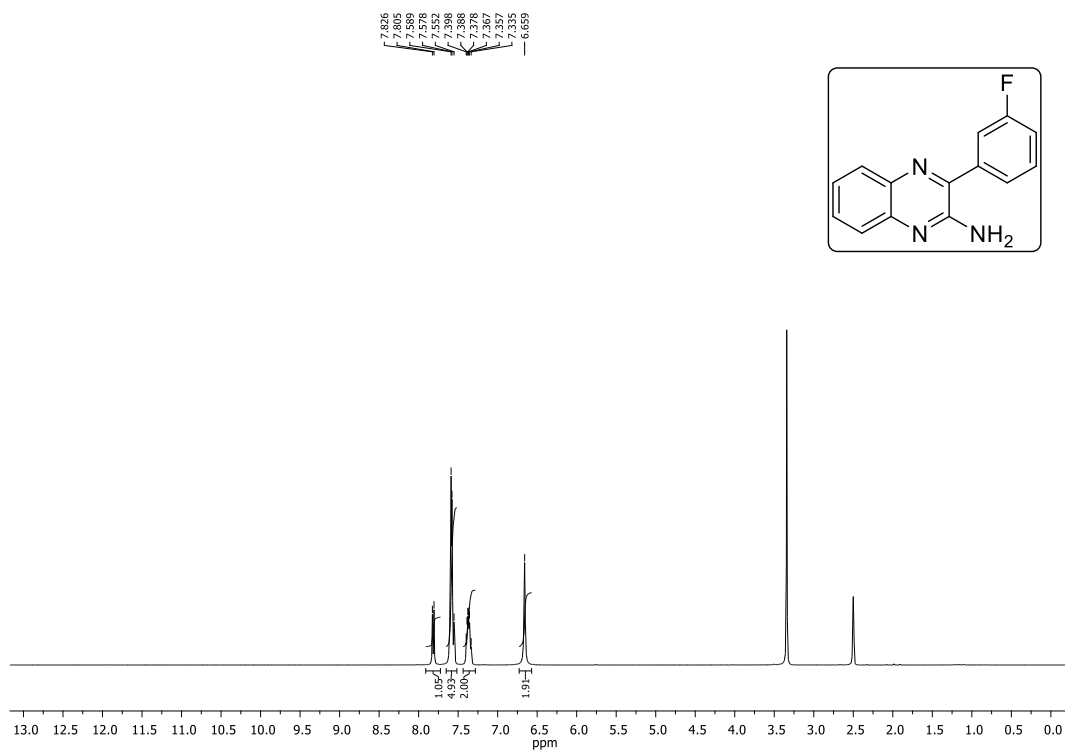

$^{13}\text{C}\{^1\text{H}\}$  NMR (100 MHz, DMSO)

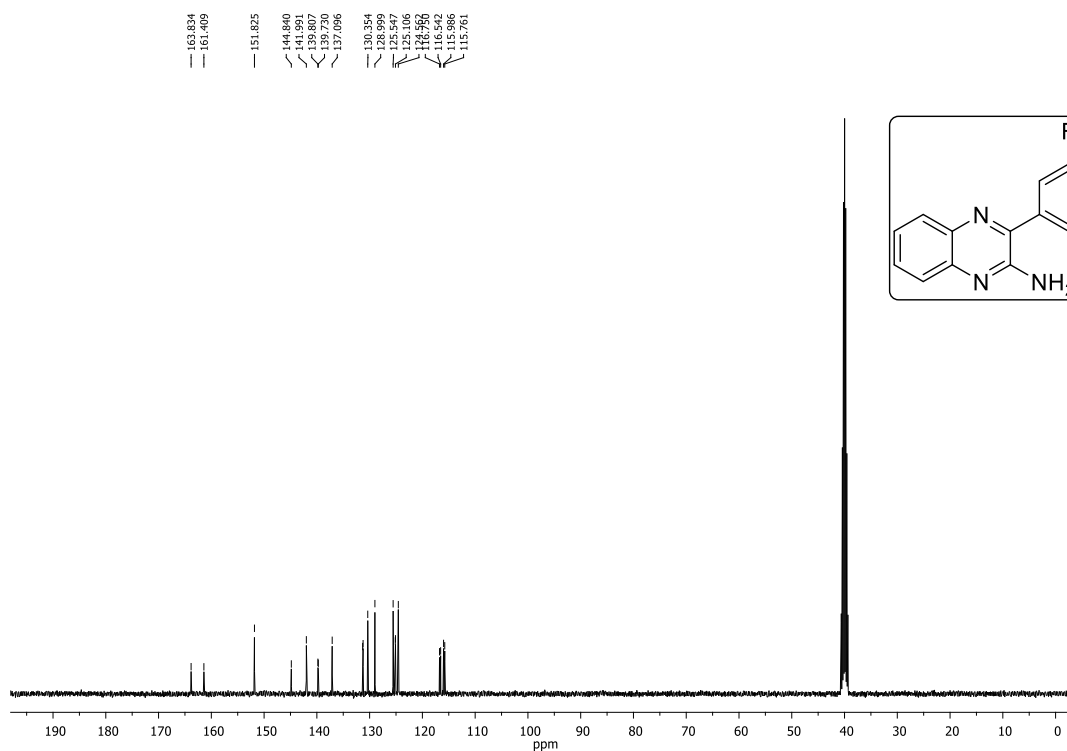

### 3-(3-Methoxyphenyl)quinoxalin-2-amine (3k)

$^1\text{H}$  NMR (400 MHz, DMSO)

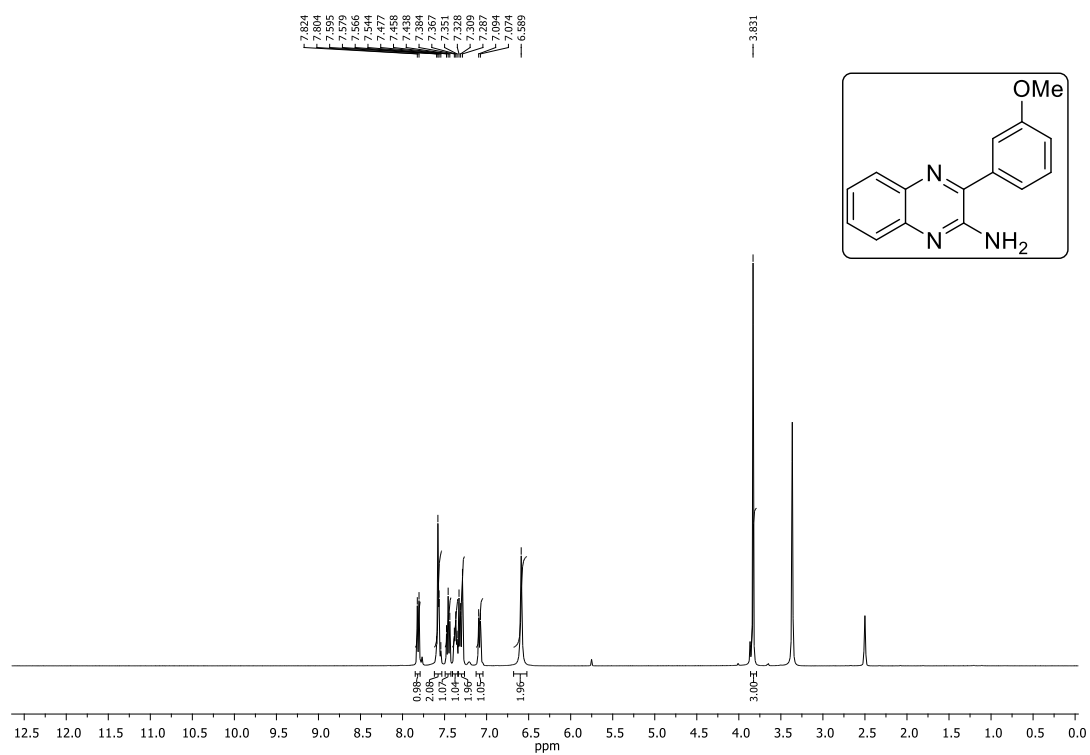

$^{13}\text{C}\{^1\text{H}\}$  NMR (100 MHz, DMSO)

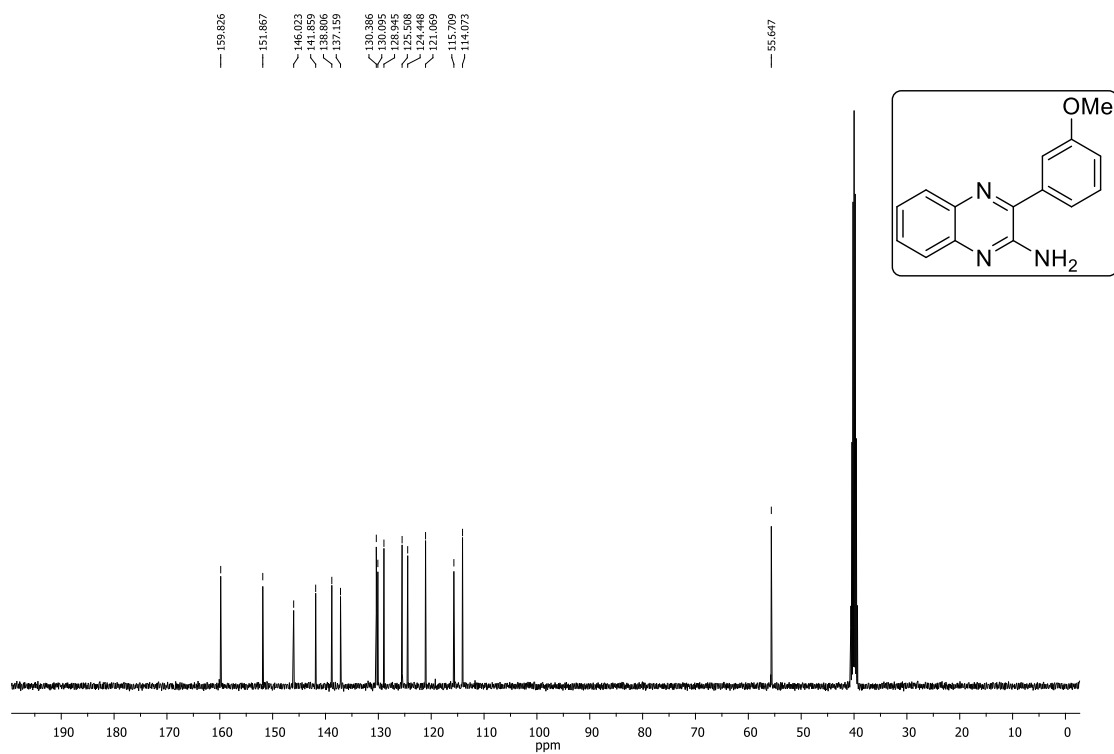

### 3-(*m*-Tolyl)quinoxalin-2-amine (31)

$^1\text{H}$  NMR (400 MHz, DMSO)

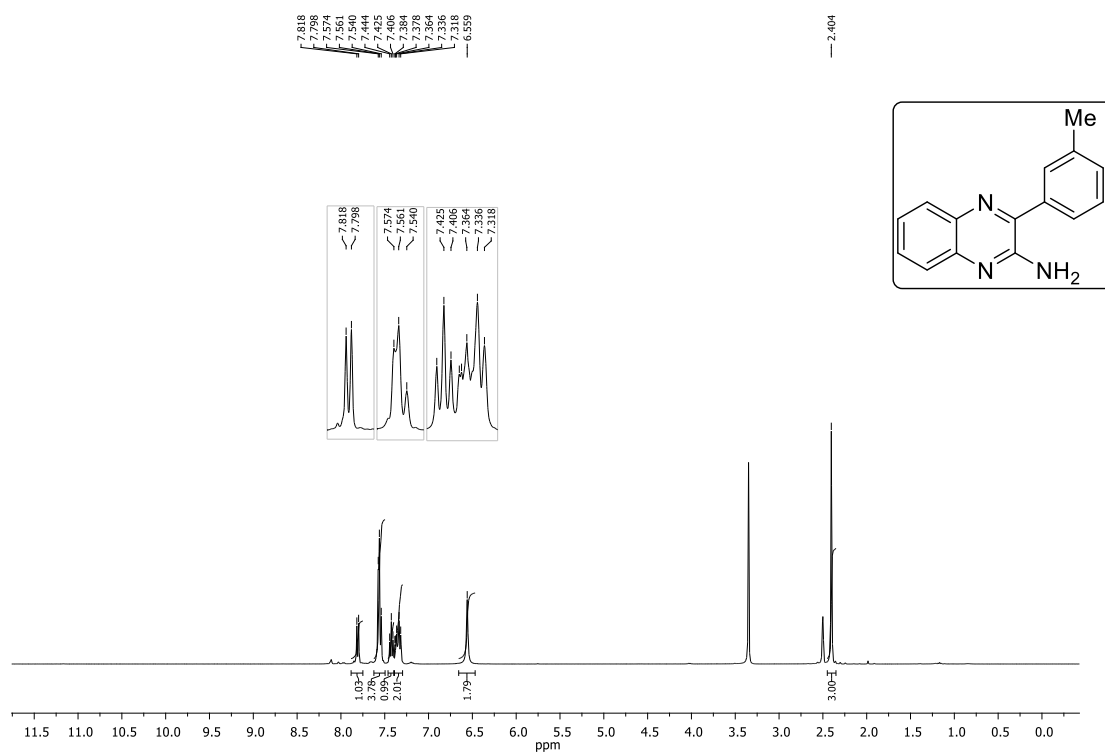

$^{13}\text{C}\{^1\text{H}\}$  NMR (100 MHz, DMSO)

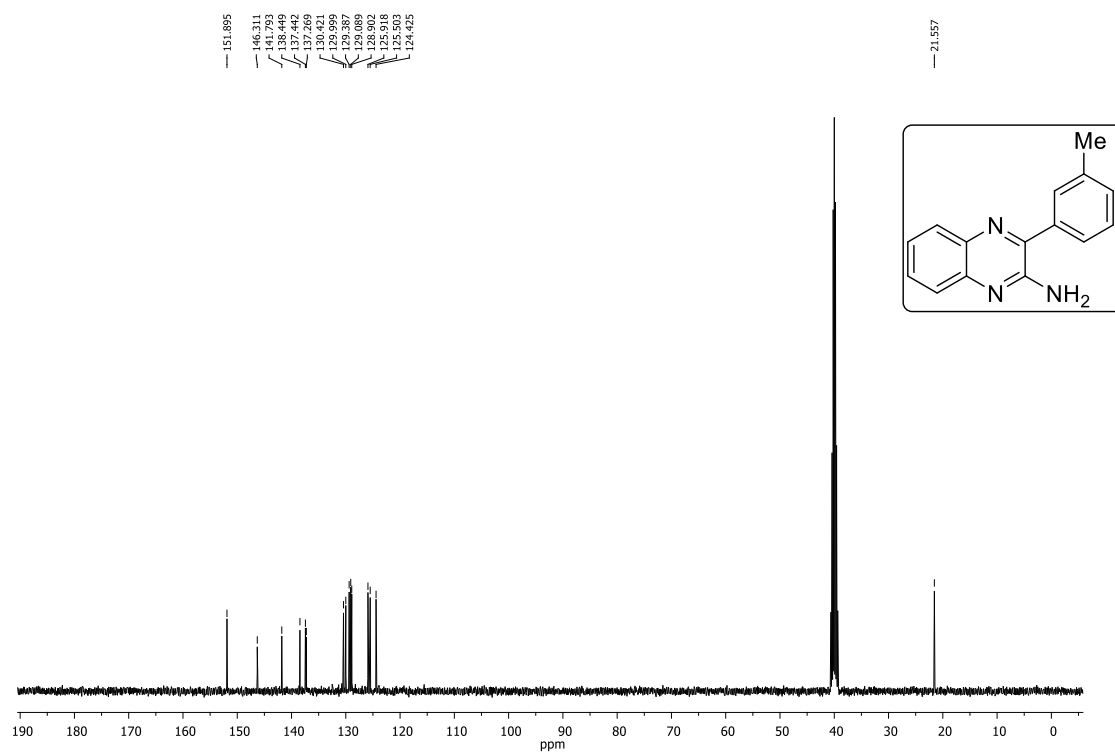



### 3-(3,5-Dimethylphenyl)quinoxalin-2-amine (3m)

$^1\text{H}$  NMR (400 MHz, DMSO)

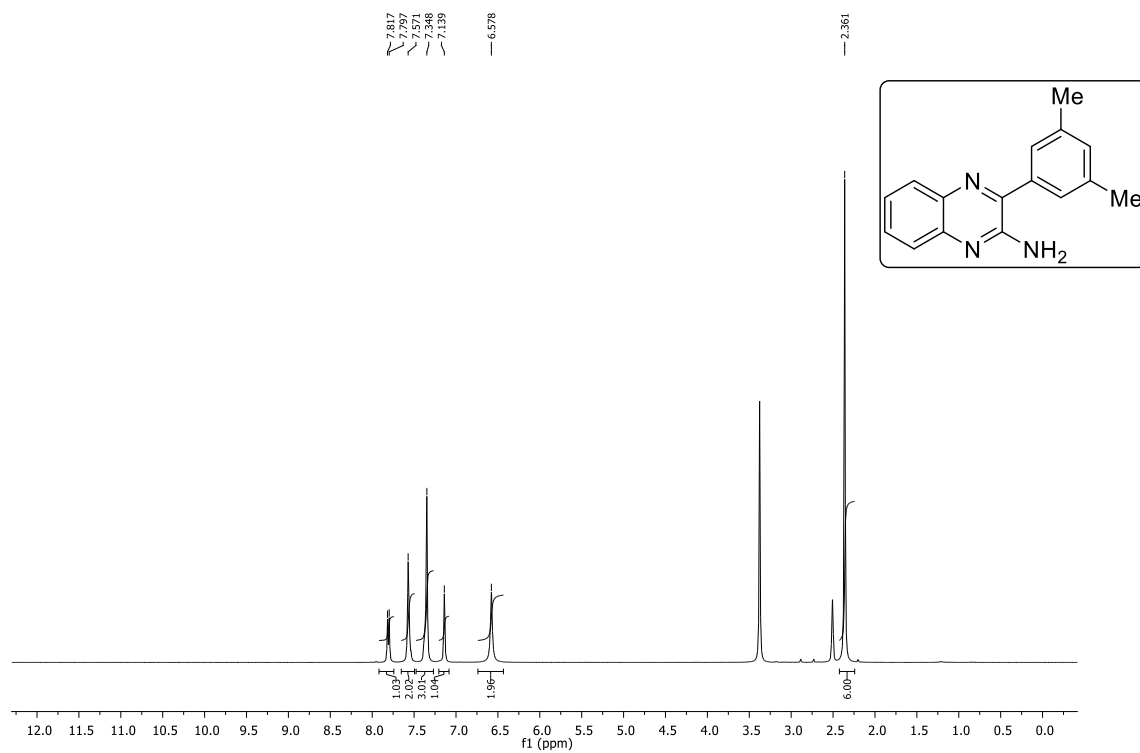

$^{13}\text{C}\{^1\text{H}\}$  NMR (100 MHz, DMSO)

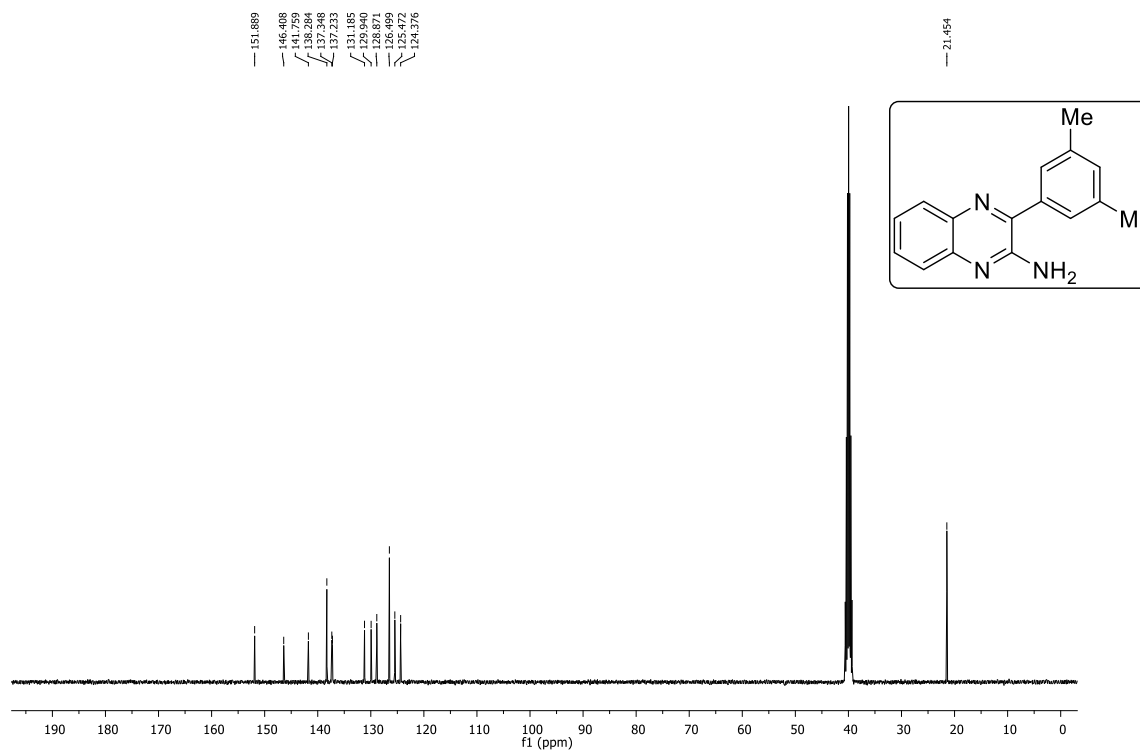

### 3-(2,3-Dimethoxyphenyl)quinoxalin-2-amine (3n)

$^1\text{H}$  NMR (400 MHz, DMSO)

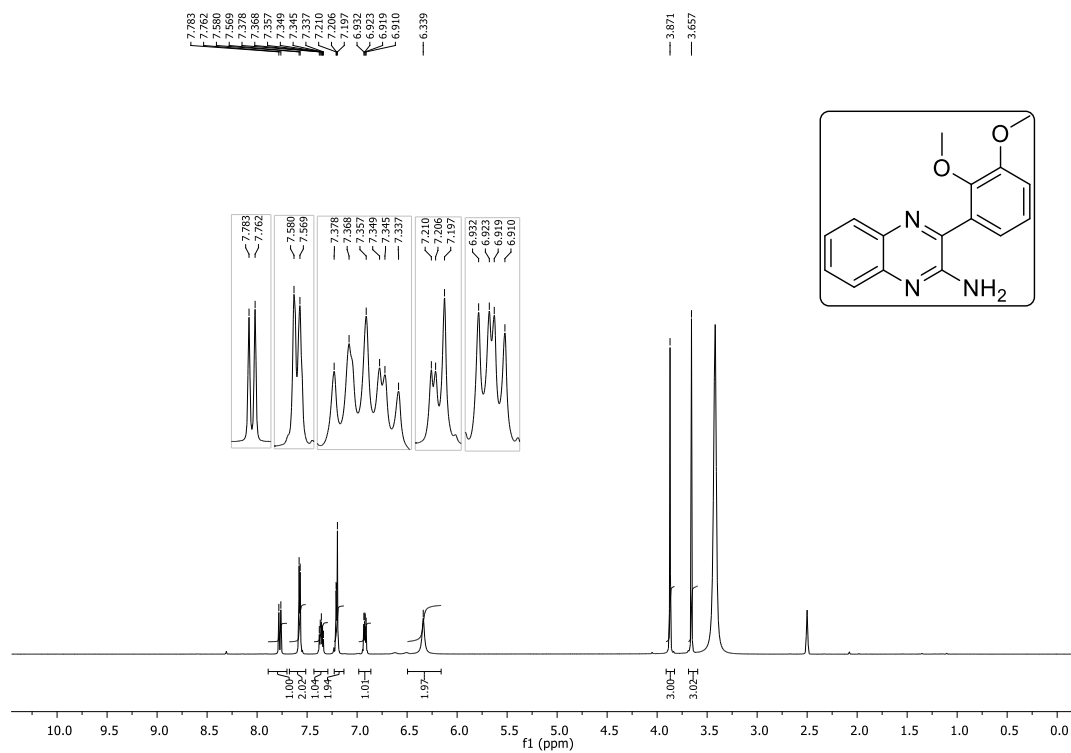

$^{13}\text{C}\{^1\text{H}\}$  NMR (175 MHz, DMSO)

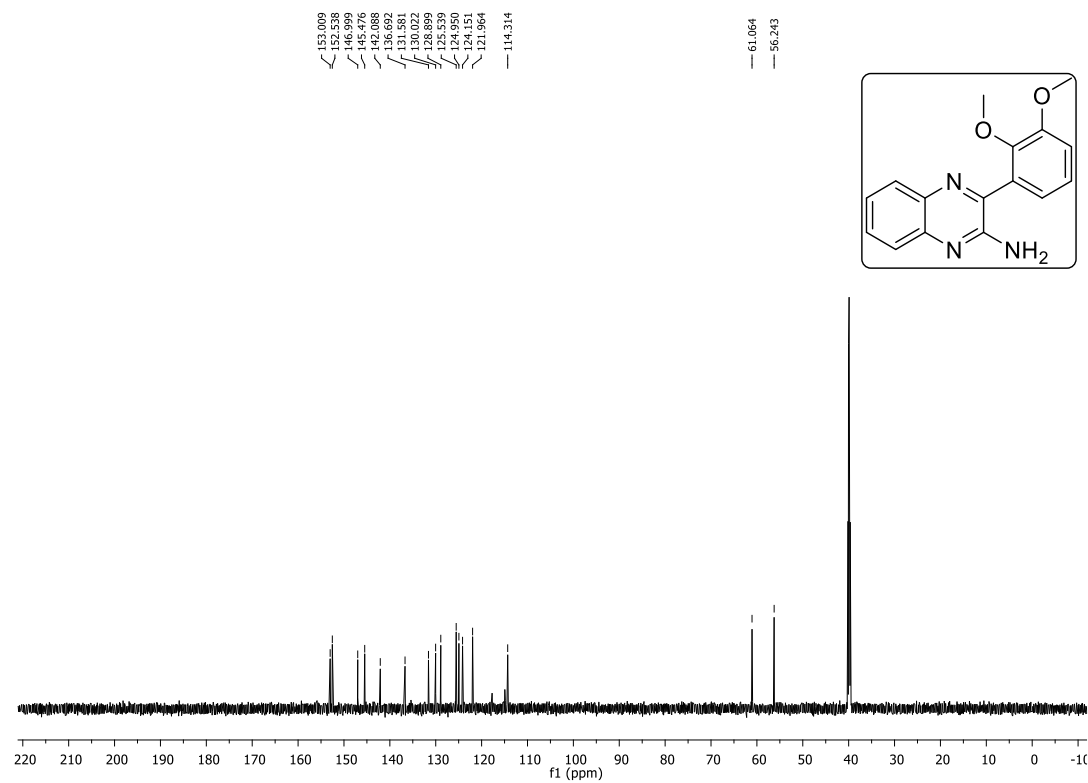

### 3-(Naphthalen-2-yl)quinoxalin-2-amine (3o)

$^1\text{H}$  NMR (400 MHz, DMSO)

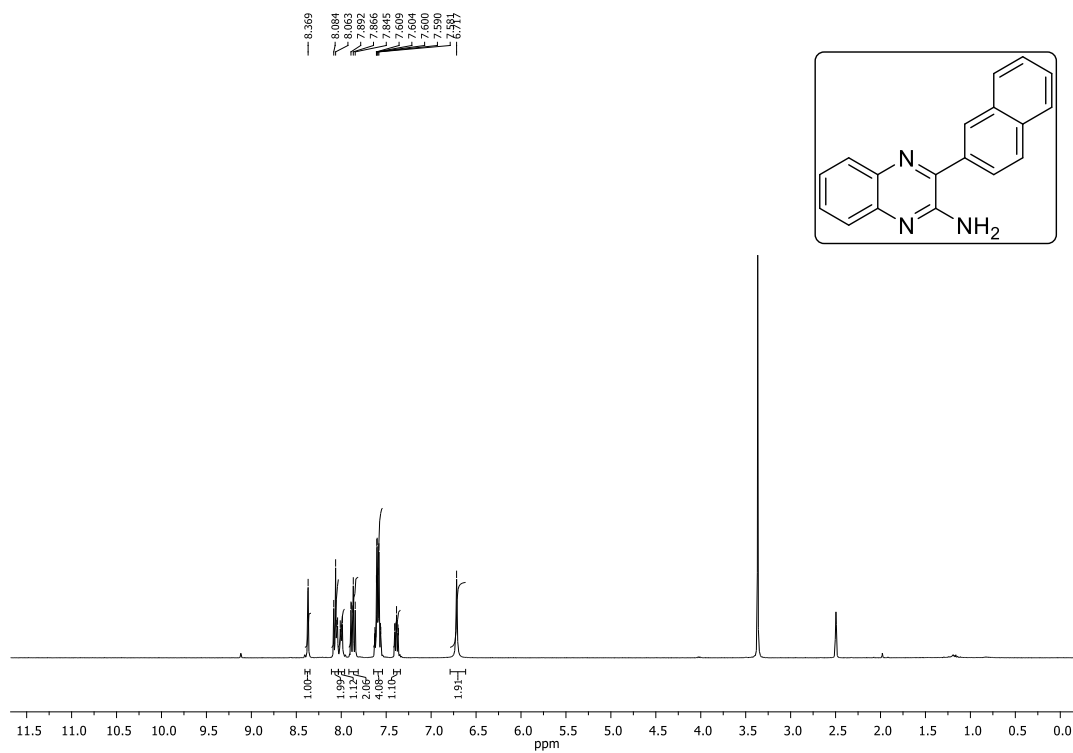

$^{13}\text{C}\{^1\text{H}\}$  NMR (100 MHz, DMSO)

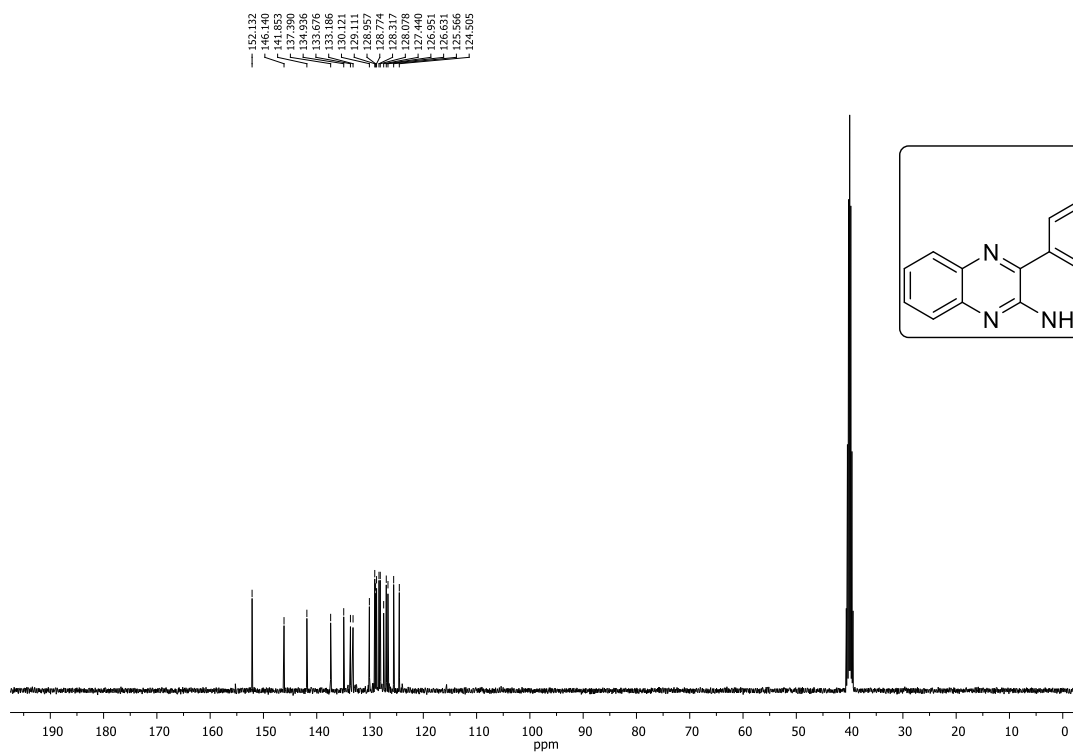

### 3-(Naphthalen-1-yl)quinoxalin-2-amine (3p)

$^1\text{H}$  NMR (400 MHz, DMSO)

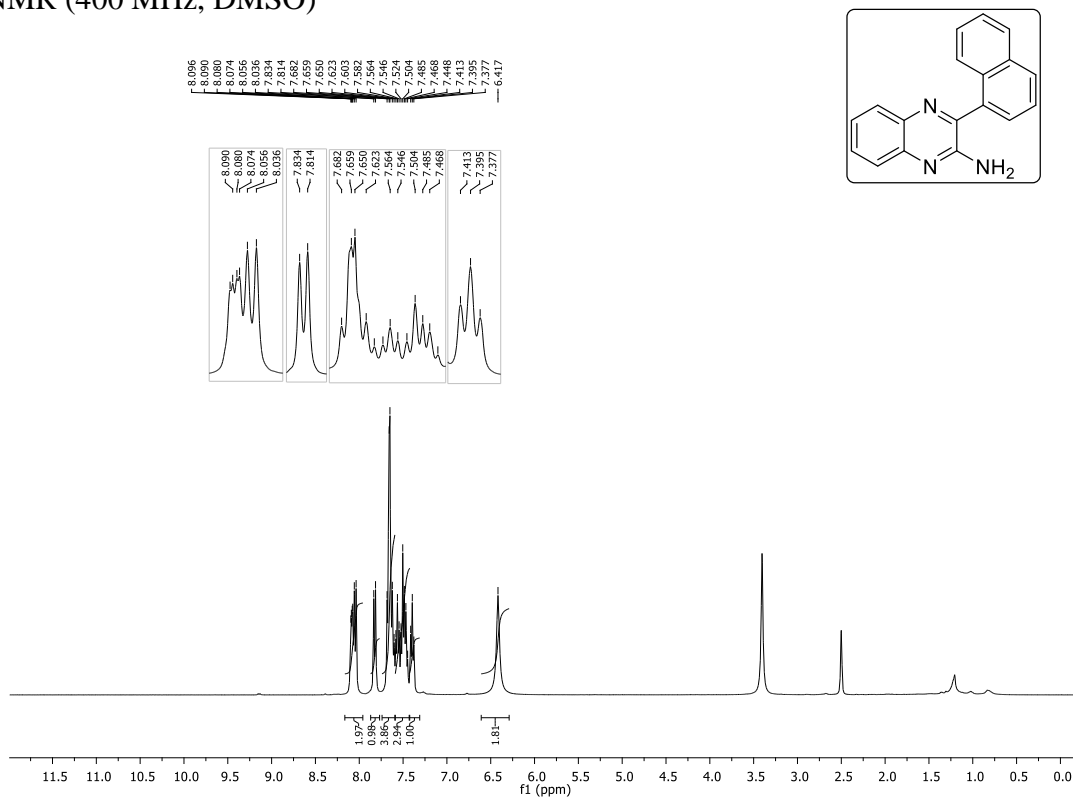

$^{13}\text{C}\{^1\text{H}\}$  NMR (100 MHz, DMSO)

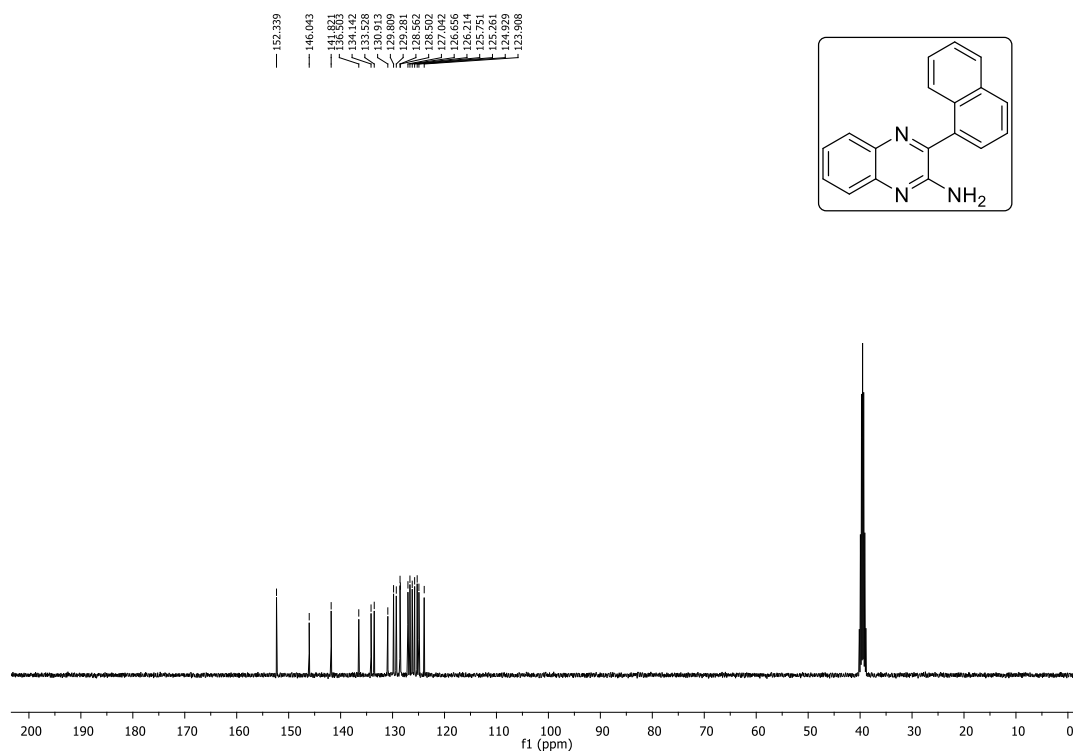

# 6,7-Dichloro-3-phenylquinoxalin-2-amine (3q)

$^1\text{H}$  NMR (400 MHz, DMSO)

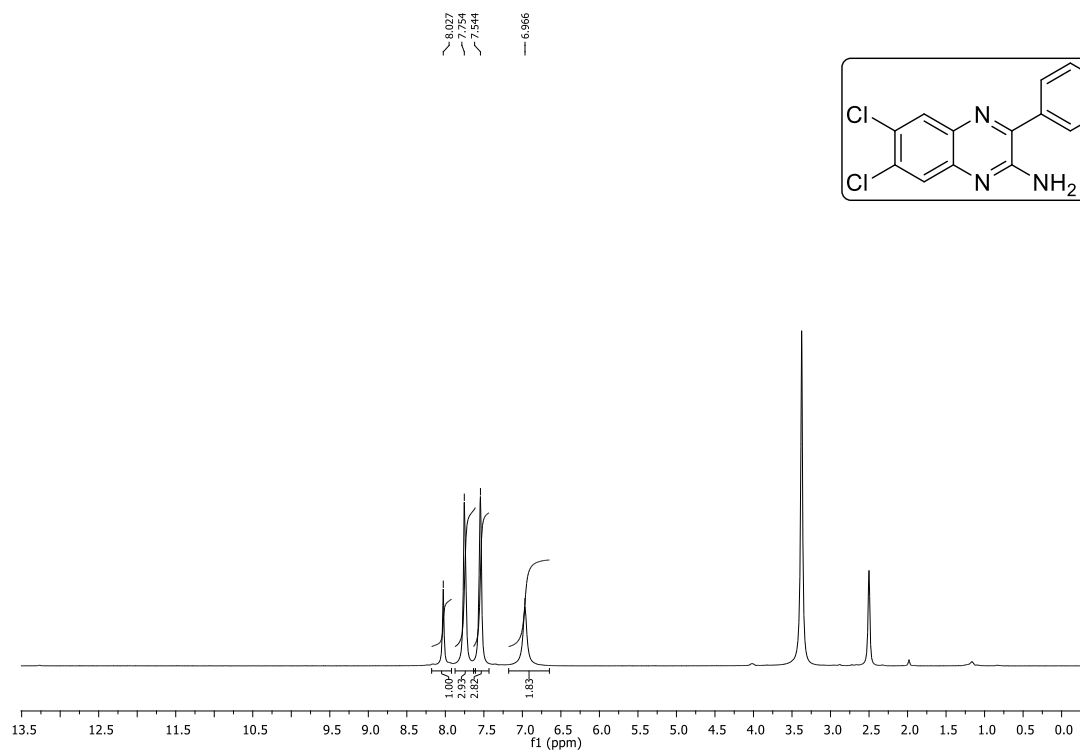

$^{13}\text{C}\{^1\text{H}\}$  NMR (100 MHz, DMSO)

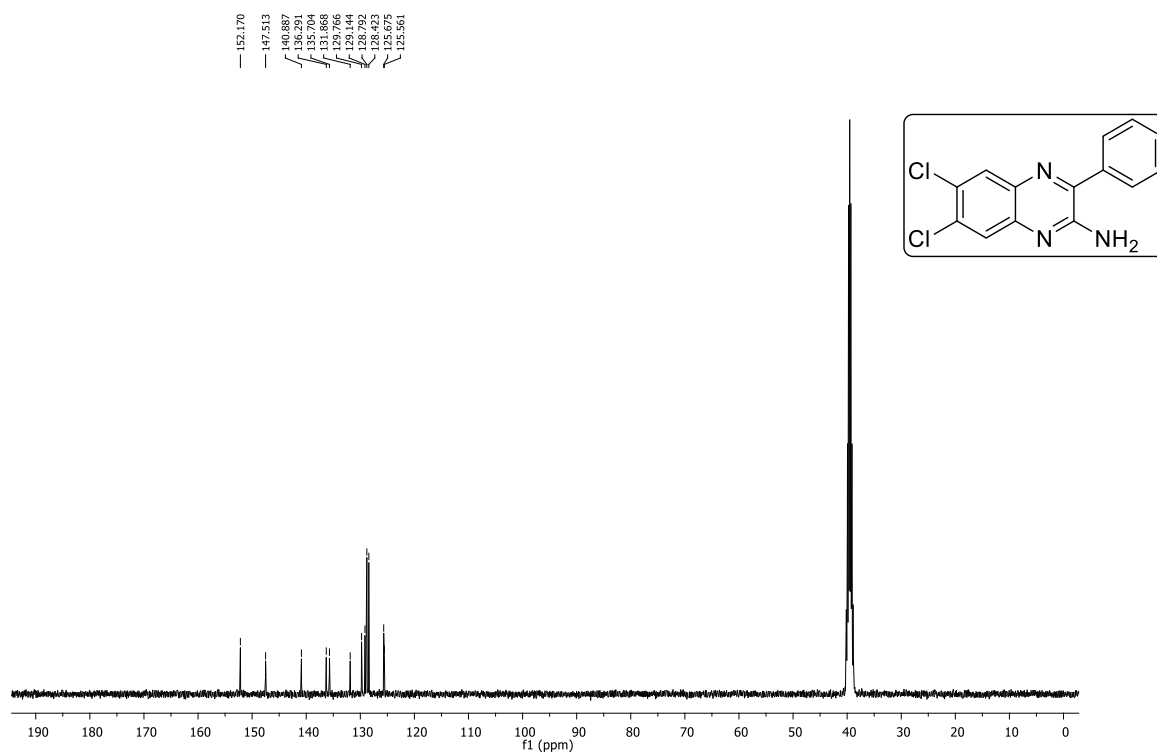

# 6,7-Dichloro-3-(*o*-tolyl)quinoxalin-2-amine (3r)

$^1\text{H}$  NMR (400 MHz, DMSO)

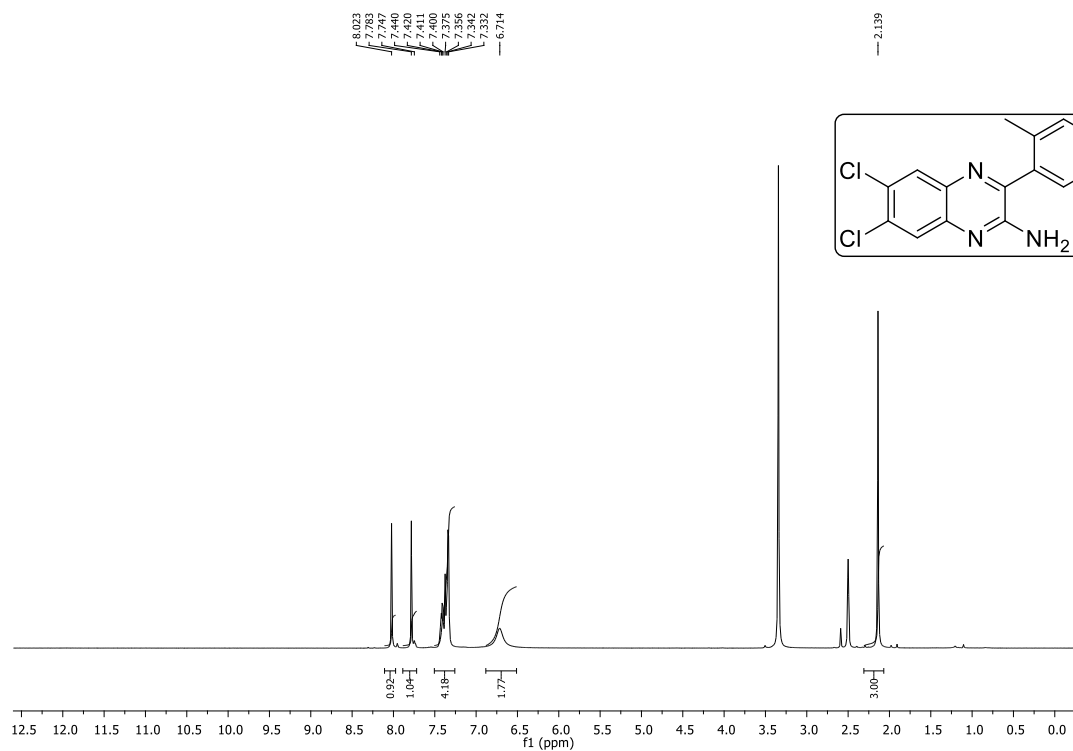

$^{13}\text{C}\{^1\text{H}\}$  NMR (100 MHz, DMSO)

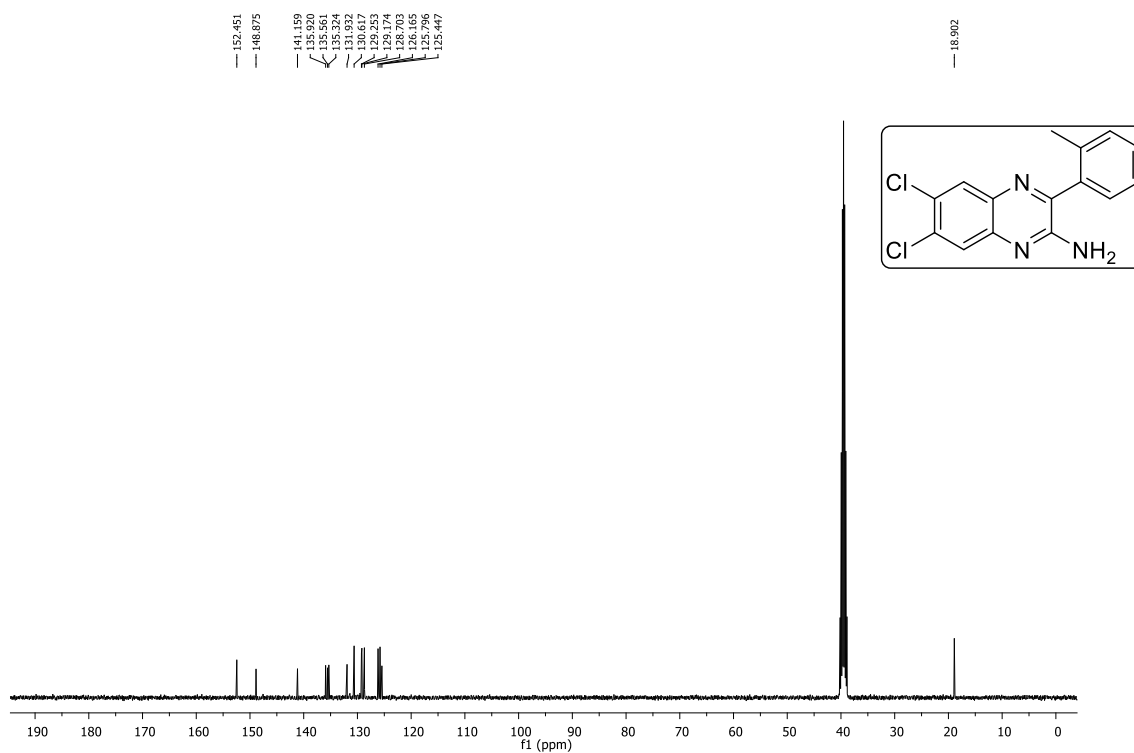

### 6,7-Dichloro-3-(*p*-tolyl)quinoxalin-2-amine (3s)

$^1\text{H}$  NMR (400 MHz, DMSO)

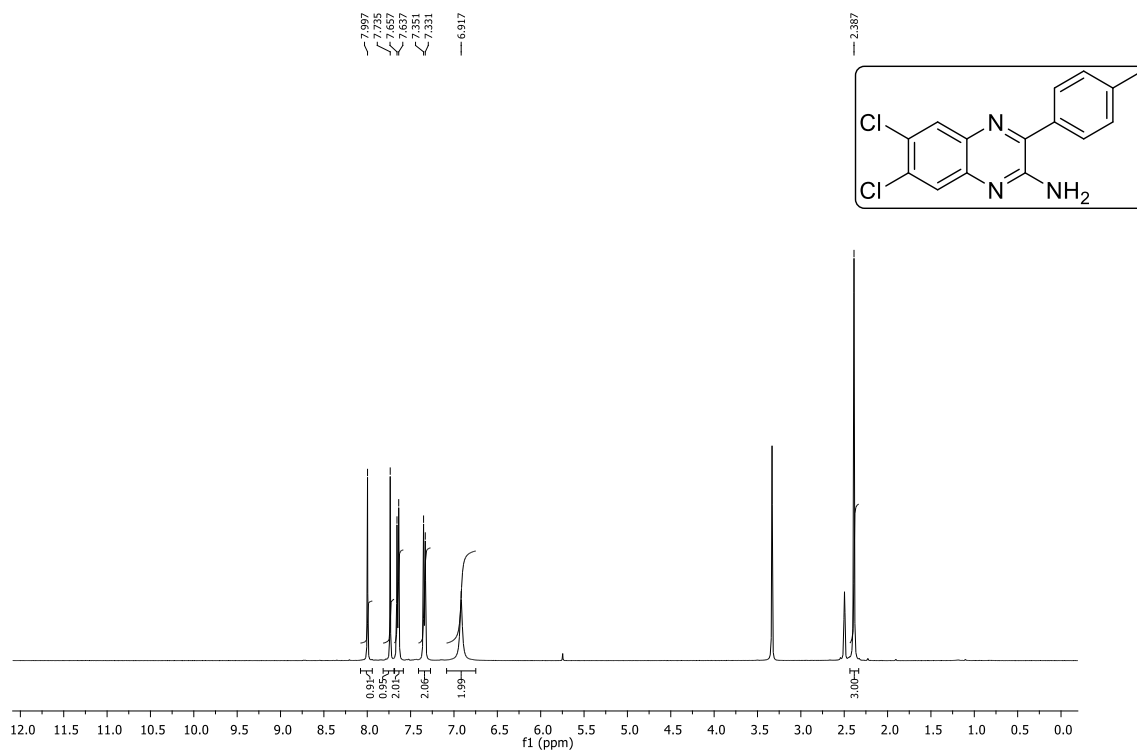

$^{13}\text{C}\{^1\text{H}\}$  NMR (100 MHz, DMSO)

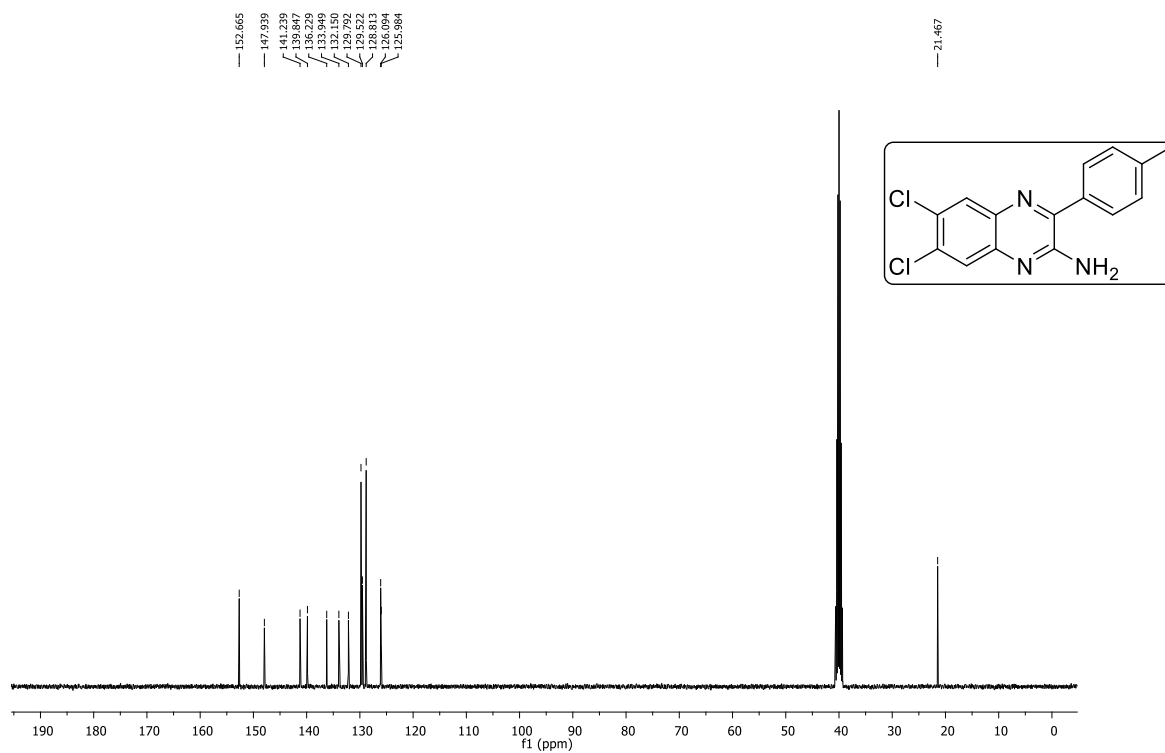

### 3-(Benzo[d][1,3]dioxol-5-yl)quinoxalin-2-amine (3t)

$^1\text{H}$  NMR (400 MHz, DMSO)

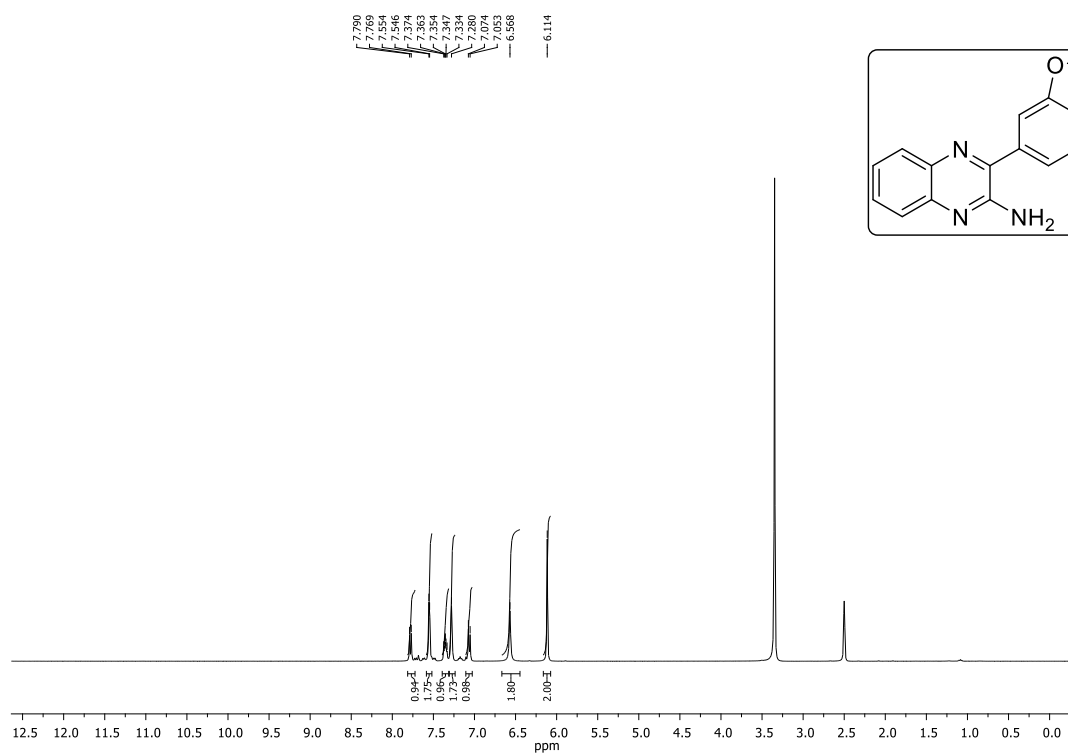

$^{13}\text{C}\{^1\text{H}\}$  NMR (100 MHz, DMSO)

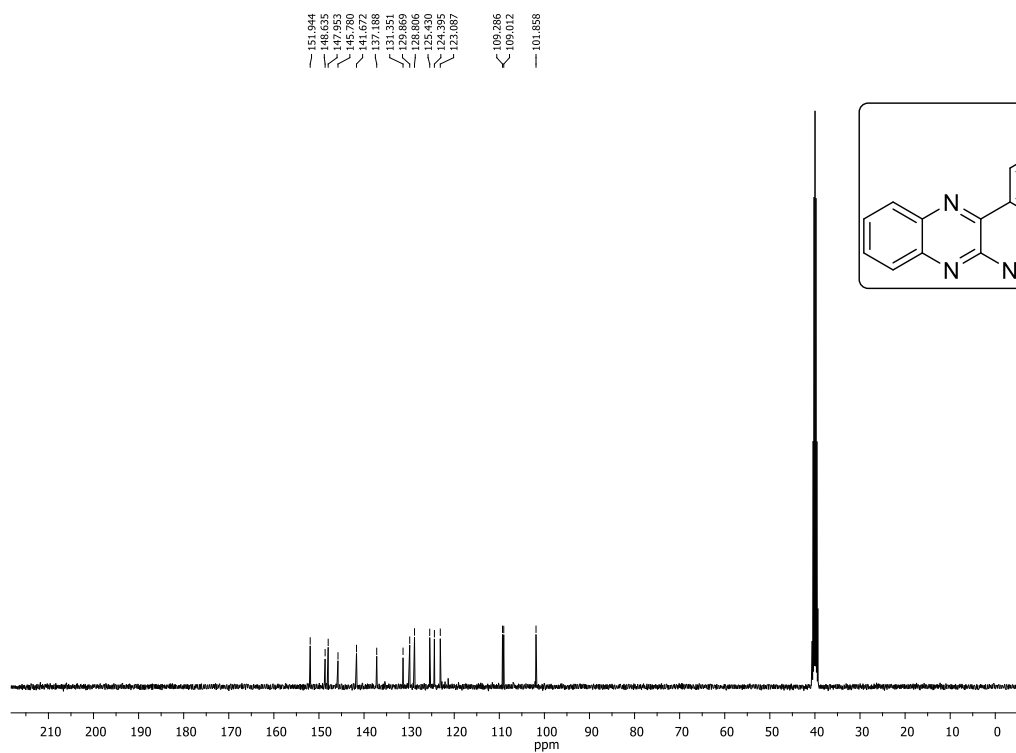



### 3-(Benzo[d][1,3]dioxol-5-yl)-6,7-dichloroquinoxalin-2-amine (3u)

<sup>1</sup>H NMR (700 MHz, DMSO)

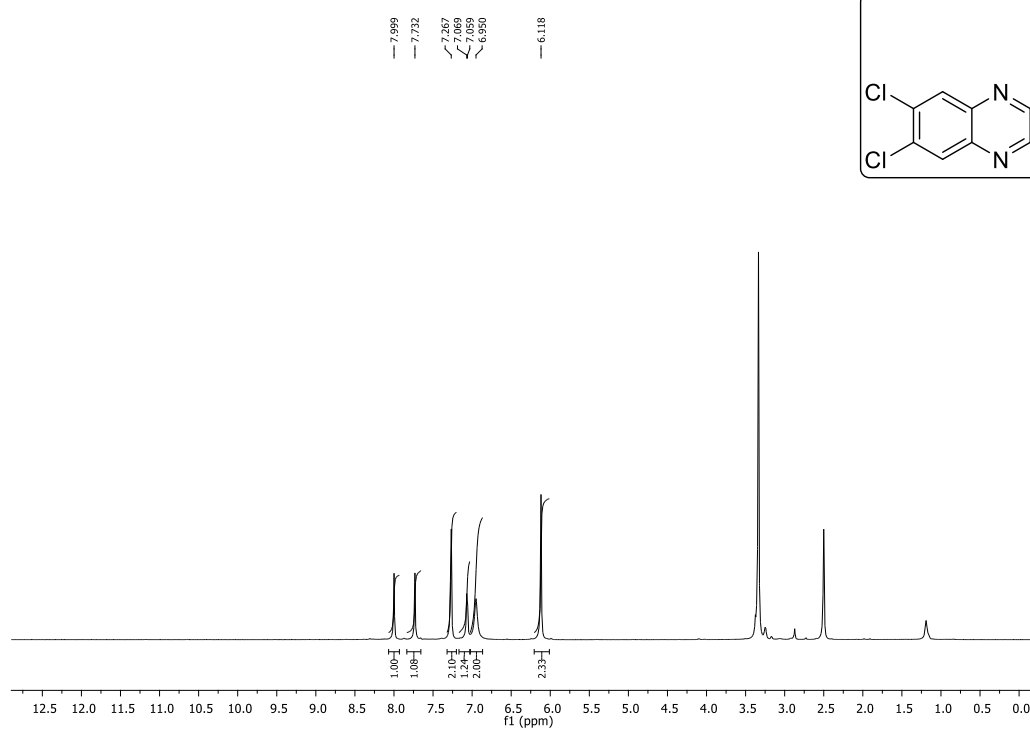

<sup>13</sup>C NMR (175 MHz, DMSO)

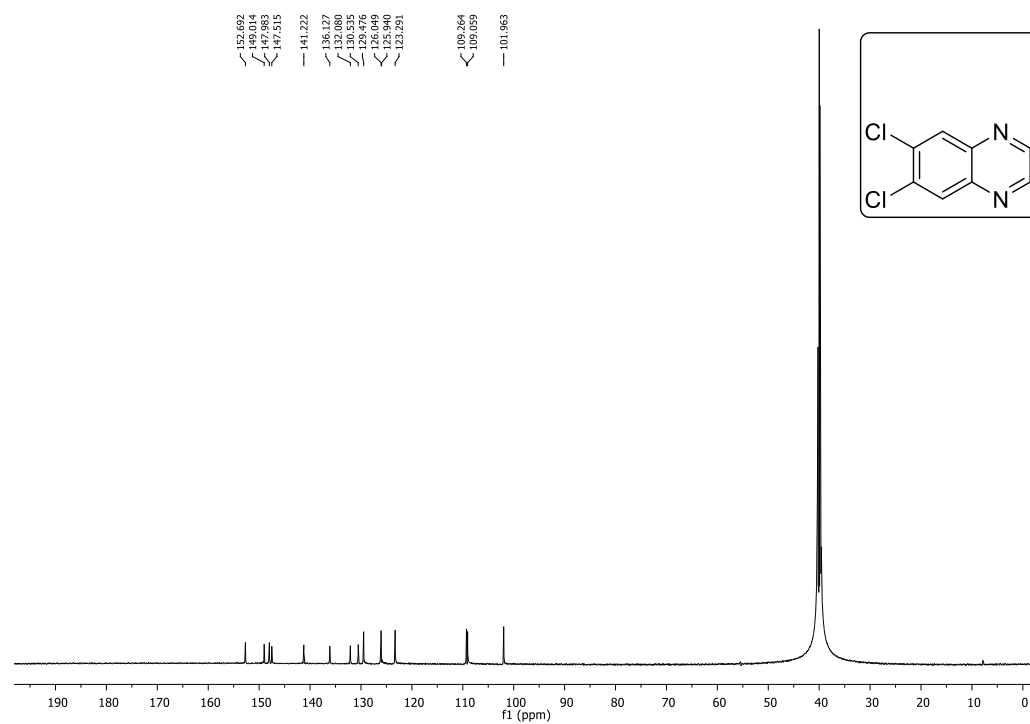

### 3-(4-(Trifluoromethyl)phenyl)quinoxalin-2-amine (3v)

$^1\text{H}$  NMR (400 MHz, DMSO)

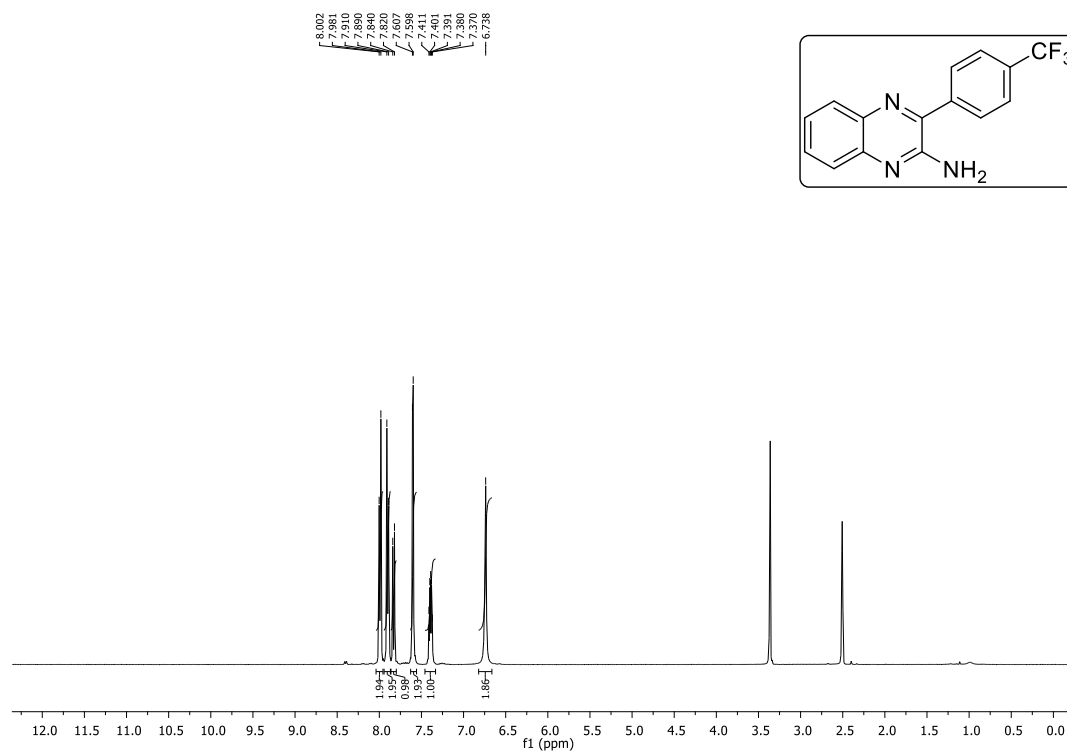

$^{13}\text{C}\{^1\text{H}\}$  NMR (100 MHz, DMSO)

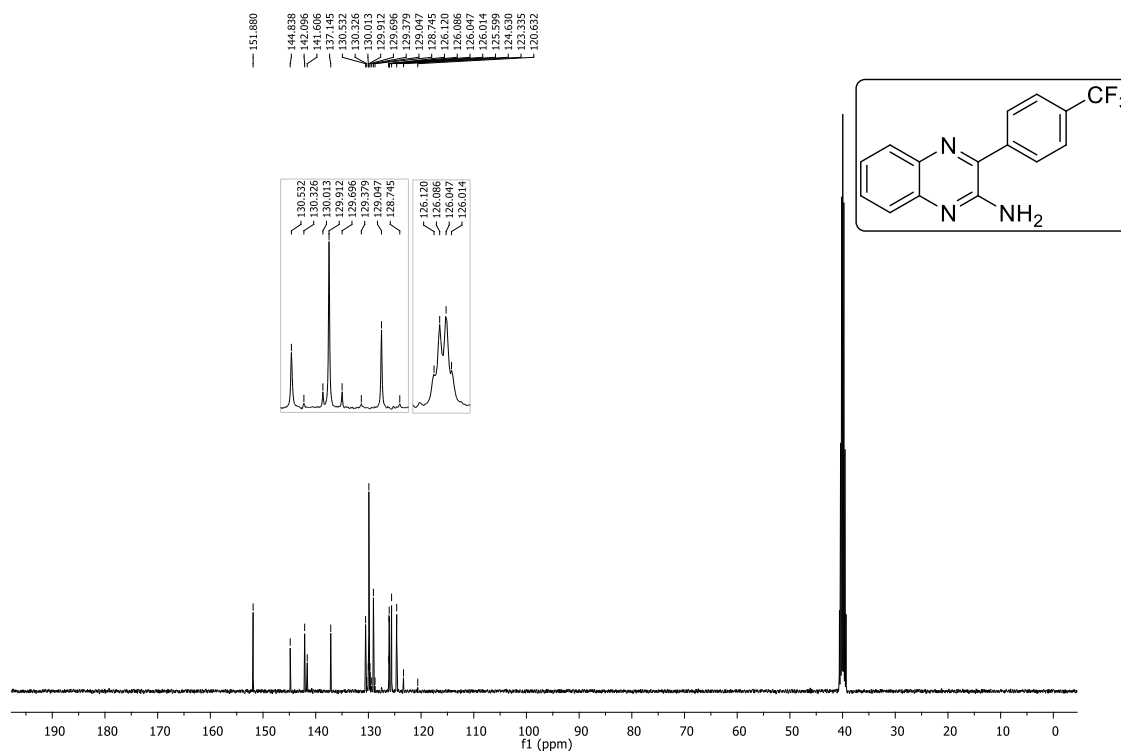

### 3-(2,4,5-Trifluorophenyl)quinoxalin-2-amine (3w)

$^1\text{H}$  NMR (400 MHz, DMSO)

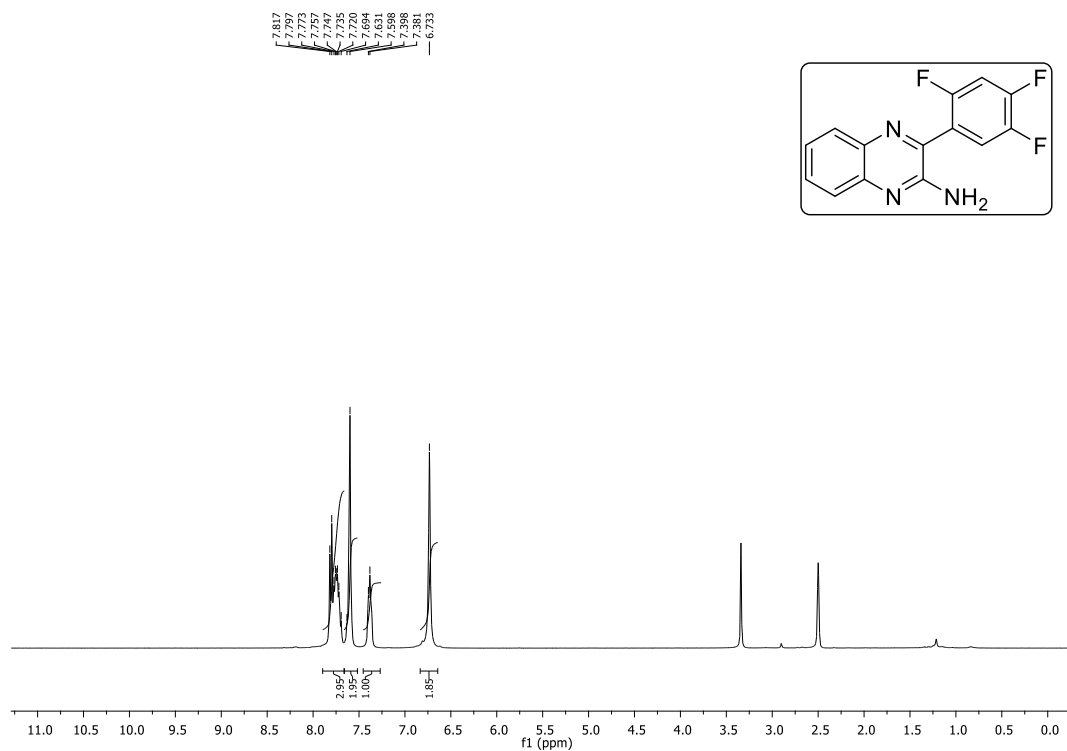

$^{13}\text{C}\{^1\text{H}\}$  NMR (175 MHz, DMSO)

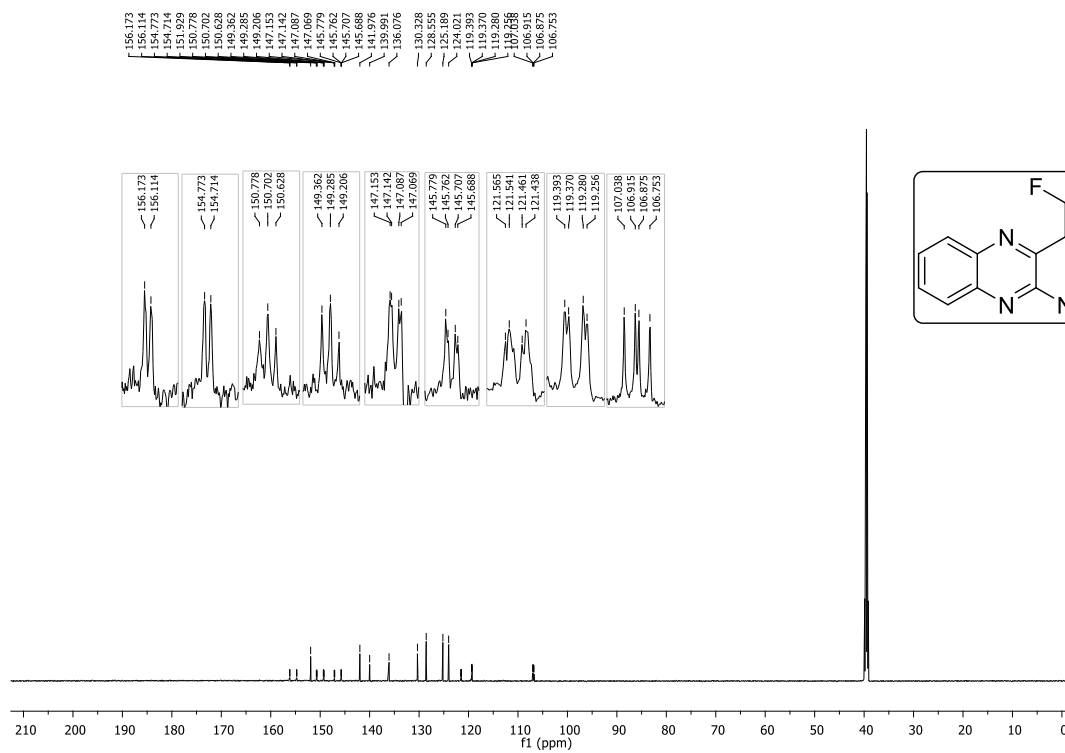

## 6-Tosyl-6*H*-indolo[2,3-*b*]quinoxaline (5a)

$^1\text{H}$  NMR (400 MHz,  $\text{CDCl}_3$ )

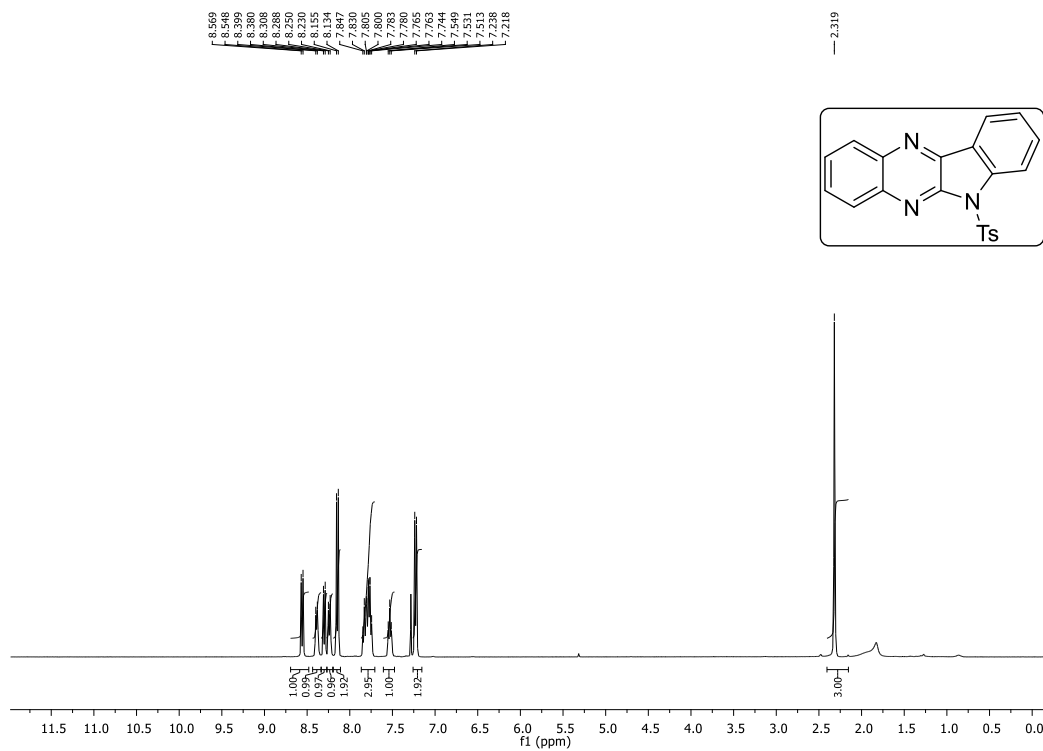

$^{13}\text{C}\{^1\text{H}\}$  NMR (100 MHz,  $\text{CDCl}_3$ )

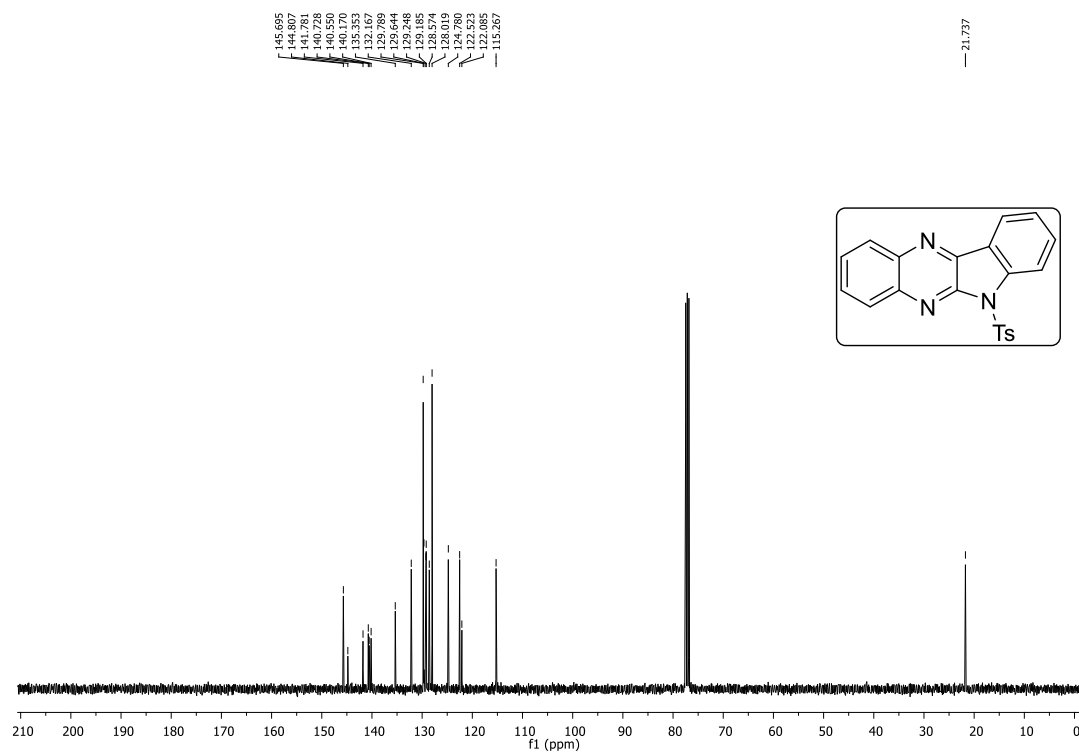

## 8-Fluoro-6-tosyl-6*H*-indolo[2,3-*b*]quinoxaline (5b)

$^1\text{H}$  NMR (400 MHz,  $\text{CDCl}_3$ )

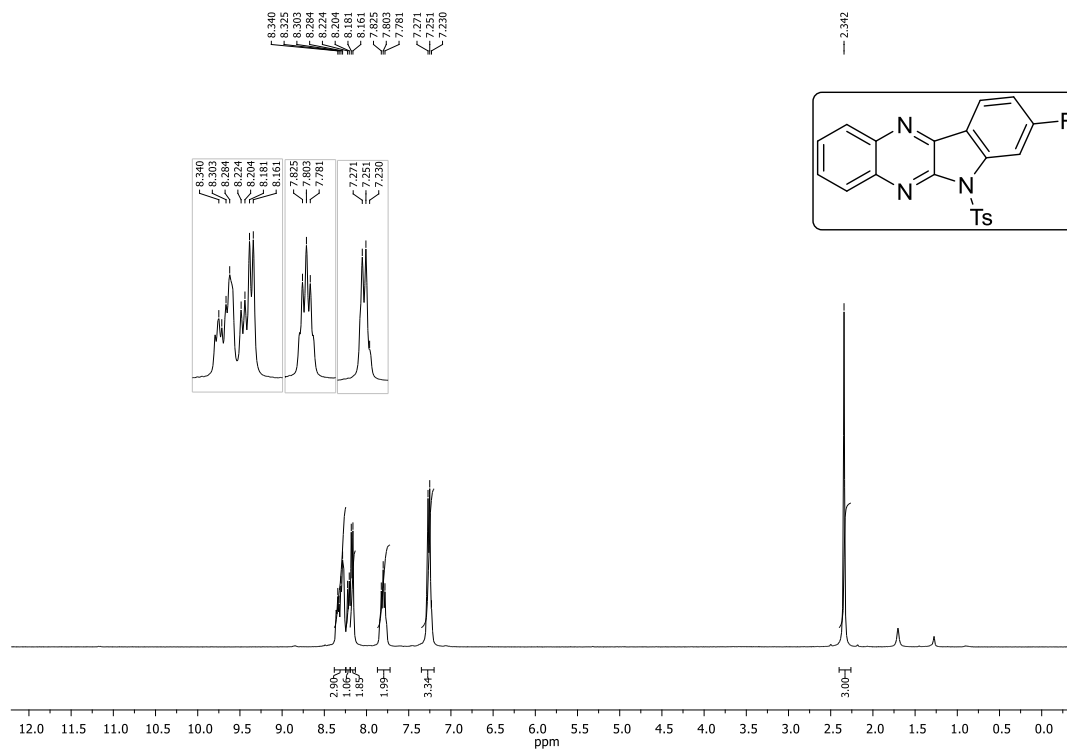

$^{13}\text{C}\{^1\text{H}\}$  NMR (100 MHz,  $\text{CDCl}_3$ )

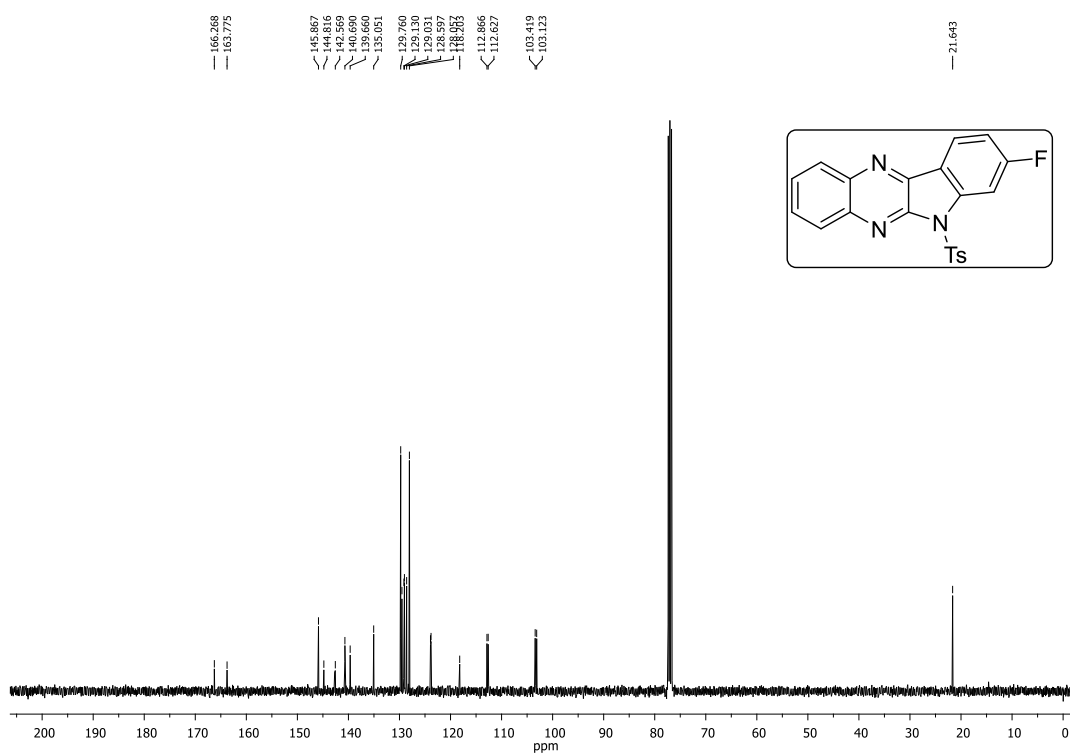

$^{19}\text{F}$  NMR (377 MHz,  $\text{CDCl}_3$ )

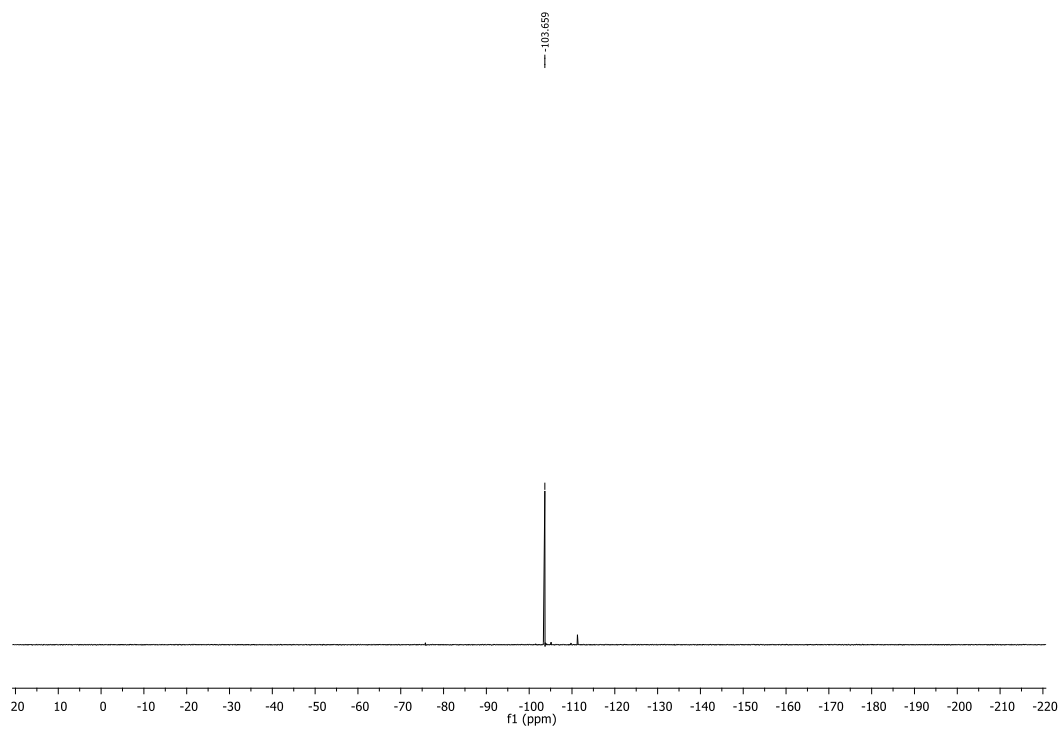

## 8-Chloro-6-tosyl-6*H*-indolo[2,3-*b*]quinoxaline (5c)

$^1\text{H}$  NMR (400 MHz,  $\text{CDCl}_3$ )

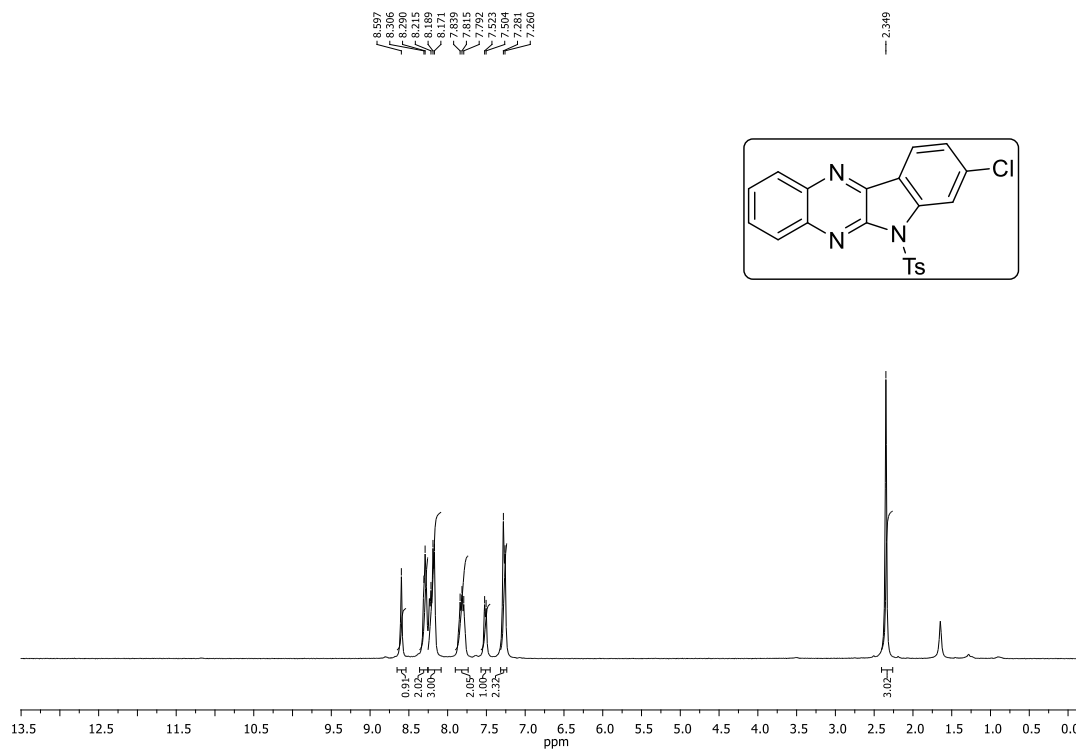

$^{13}\text{C}\{^1\text{H}\}$  NMR (100 MHz,  $\text{CDCl}_3$ )

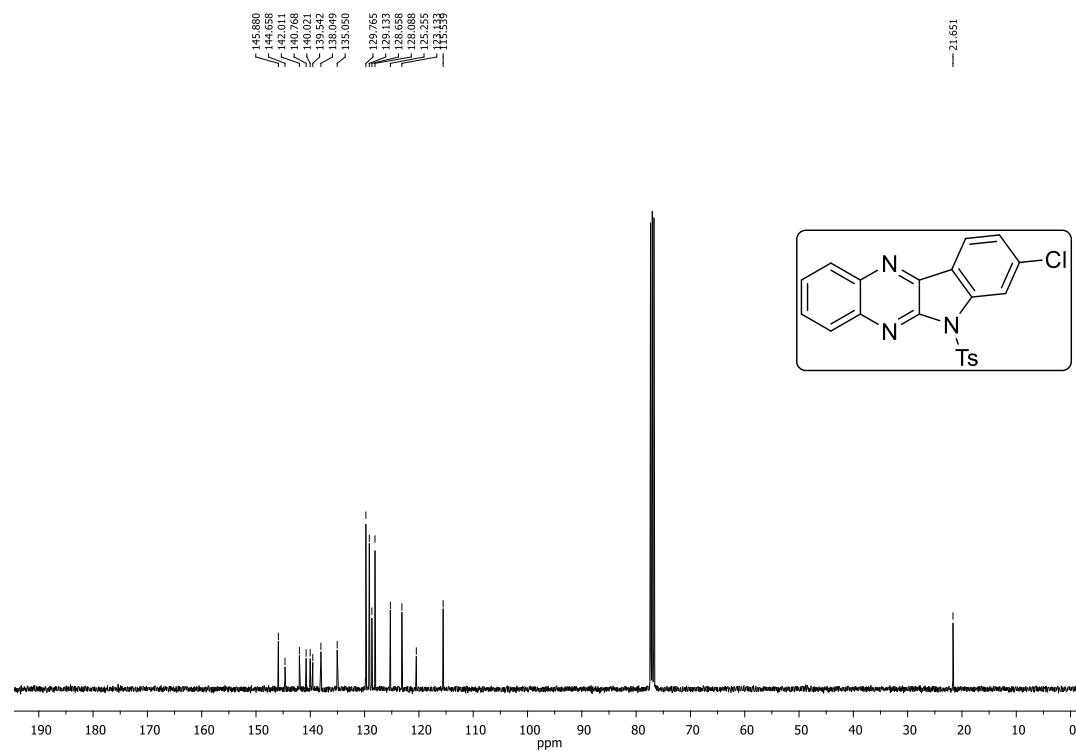

## 8-Bromo-6-tosyl-6H-indolo[2,3-b]quinoxaline (5d)

$^1\text{H}$  NMR (400 MHz,  $\text{CDCl}_3$ )

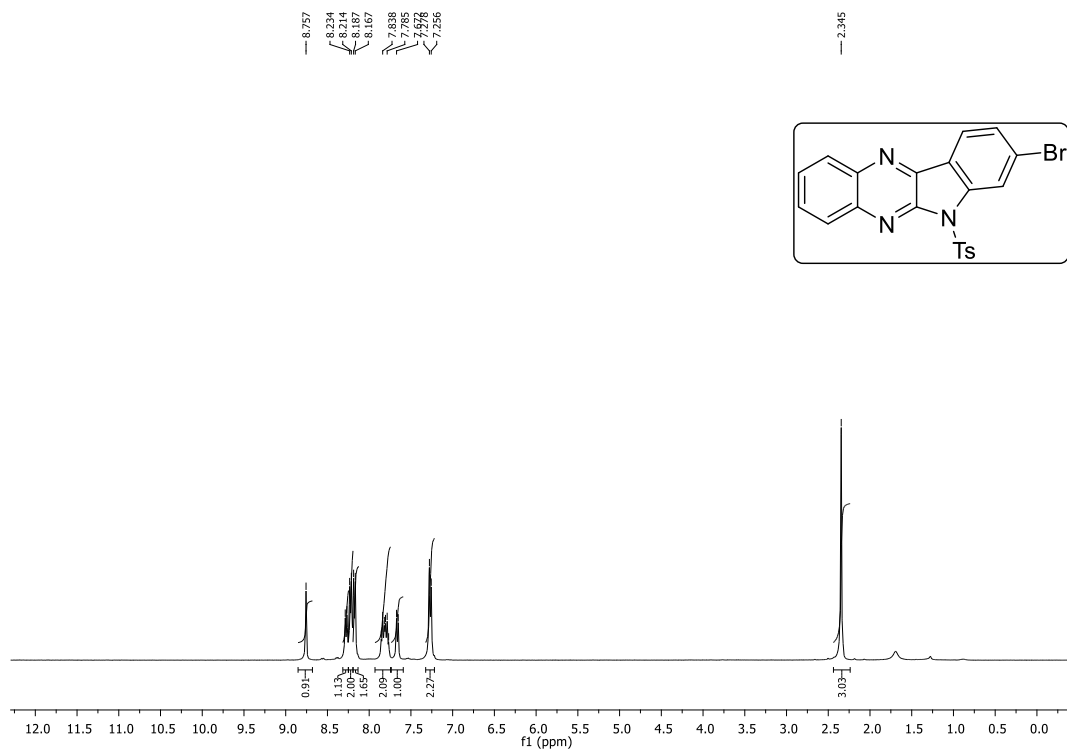

$^{13}\text{C}\{^1\text{H}\}$  NMR (100 MHz,  $\text{CDCl}_3$ )

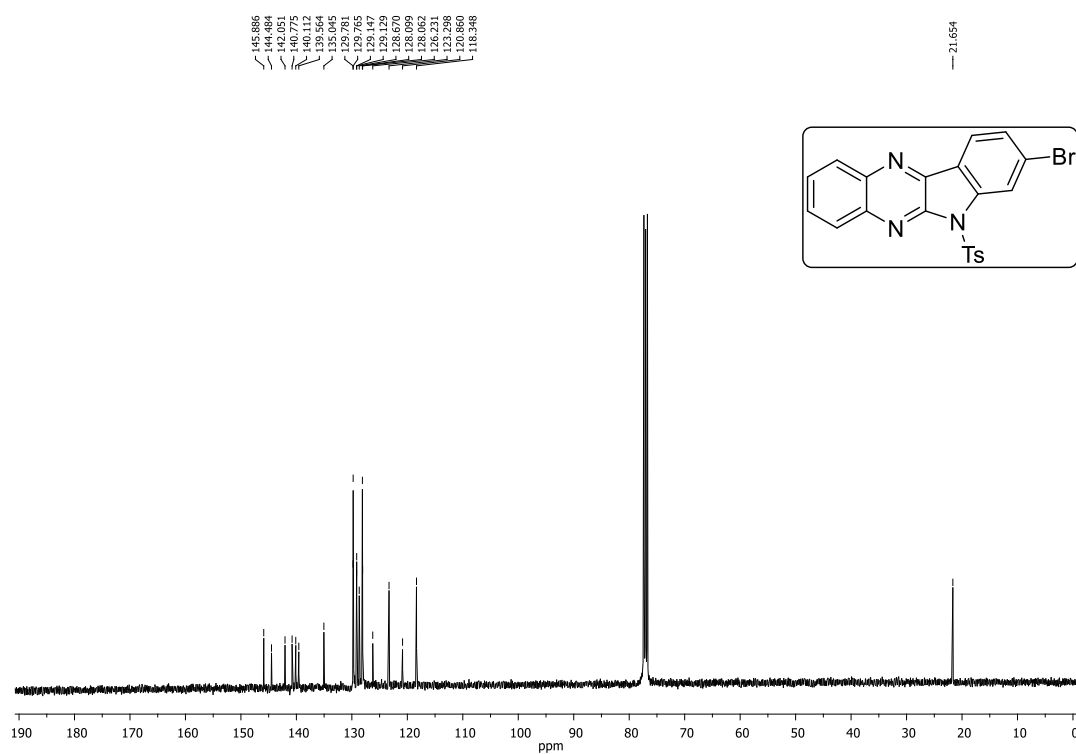



# 8-Methyl-6-tosyl-6H-indolo[2,3-b]quinoxaline (5e)

$^1\text{H}$  NMR (400 MHz,  $\text{CDCl}_3$ )

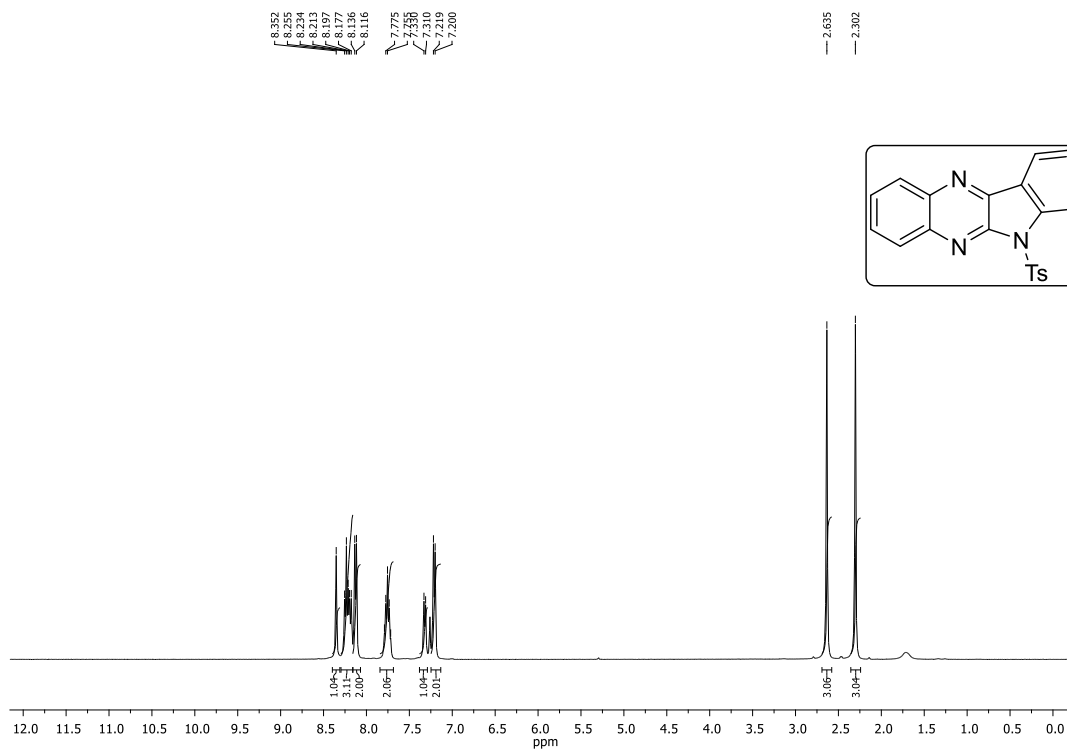

$^{13}\text{C}\{^1\text{H}\}$  NMR (100 MHz,  $\text{CDCl}_3$ )

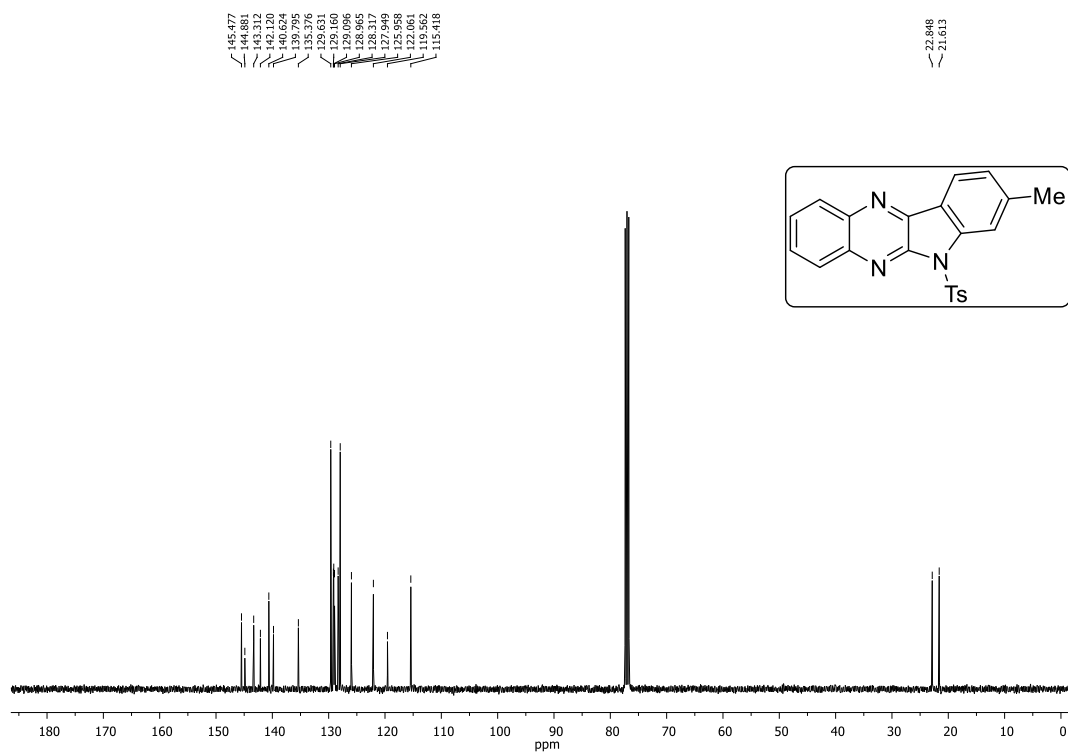

## 8-Methoxy-6-tosyl-6H-indolo[2,3-b]quinoxaline (5f)

$^1\text{H}$  NMR (400 MHz,  $\text{CDCl}_3$ )

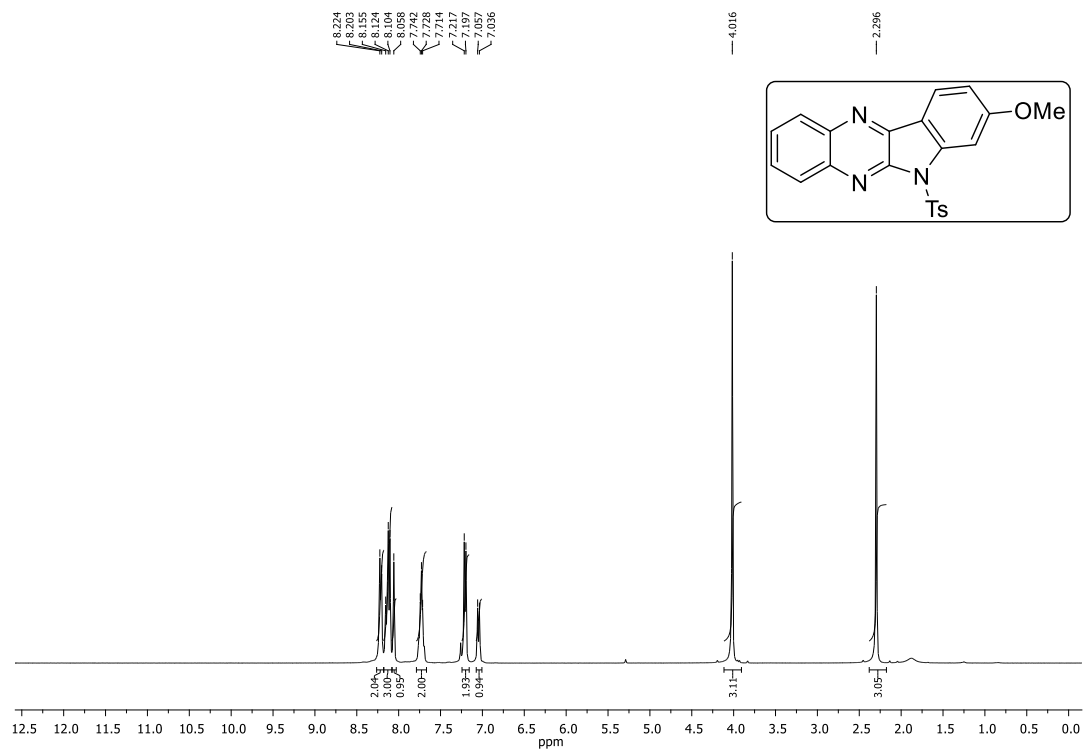

$^{13}\text{C}\{^1\text{H}\}$  NMR (100 MHz,  $\text{CDCl}_3$ )

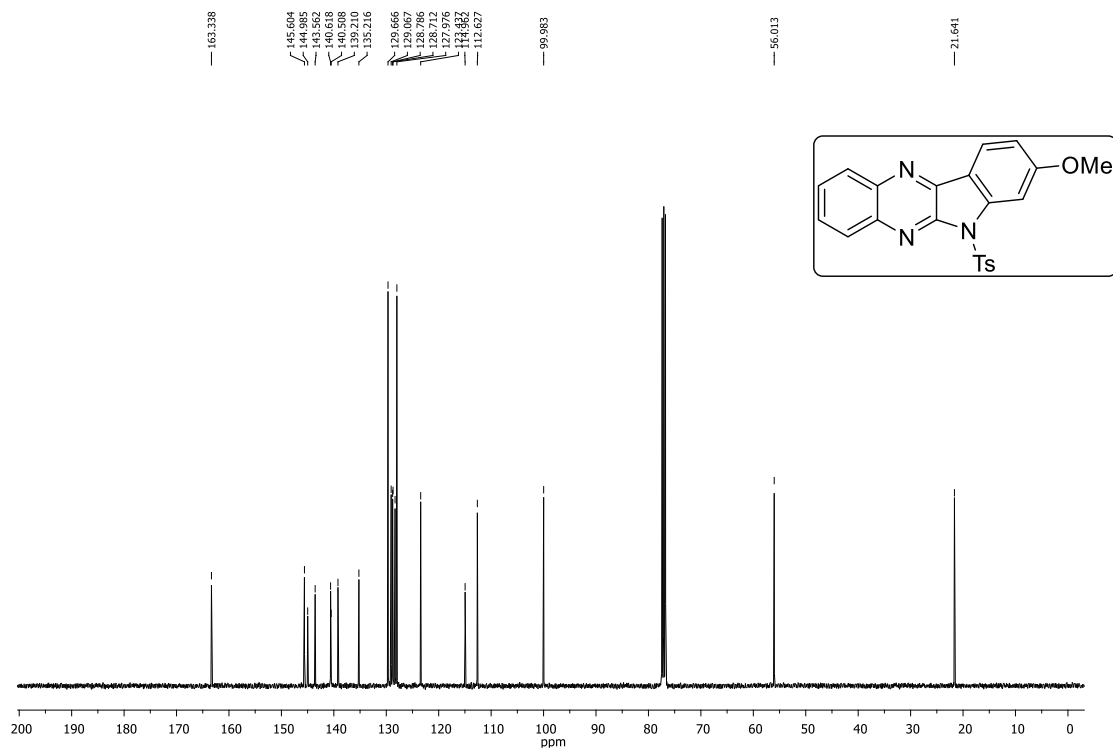

# 10-Chloro-6-tosyl-6H-indolo[2,3-b]quinoxaline (5g)

$^1\text{H}$  NMR (400 MHz,  $\text{CDCl}_3$ )

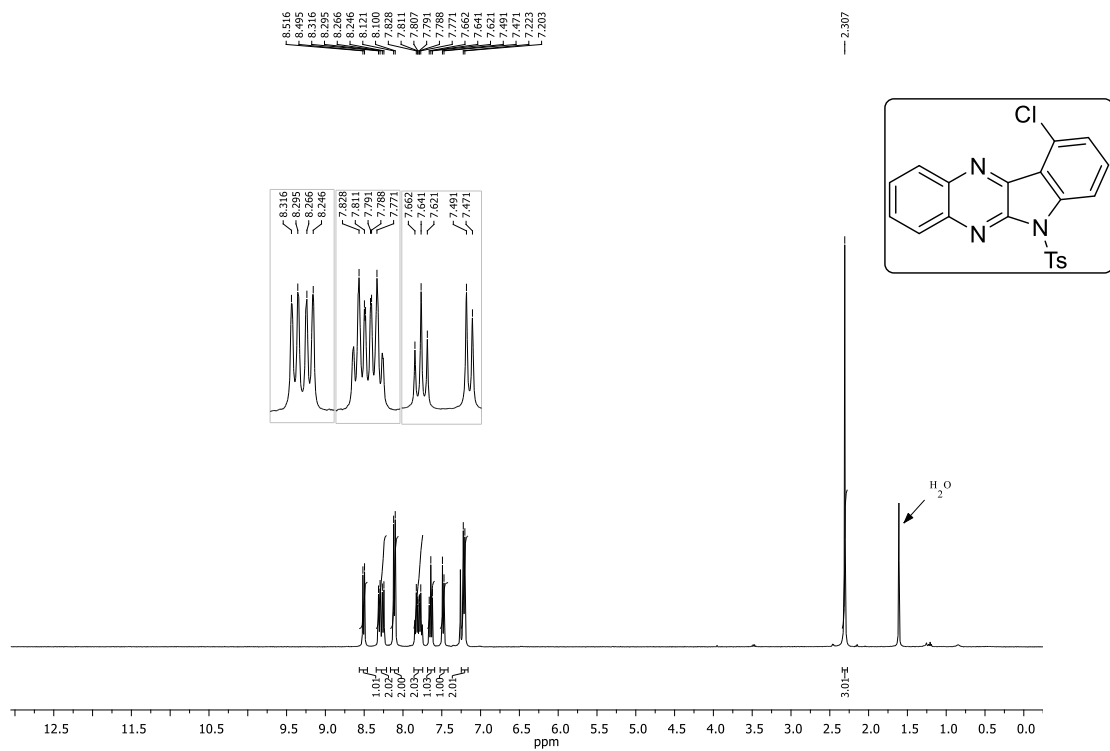

$^{13}\text{C}\{^1\text{H}\}$  NMR (100 MHz,  $\text{CDCl}_3$ )

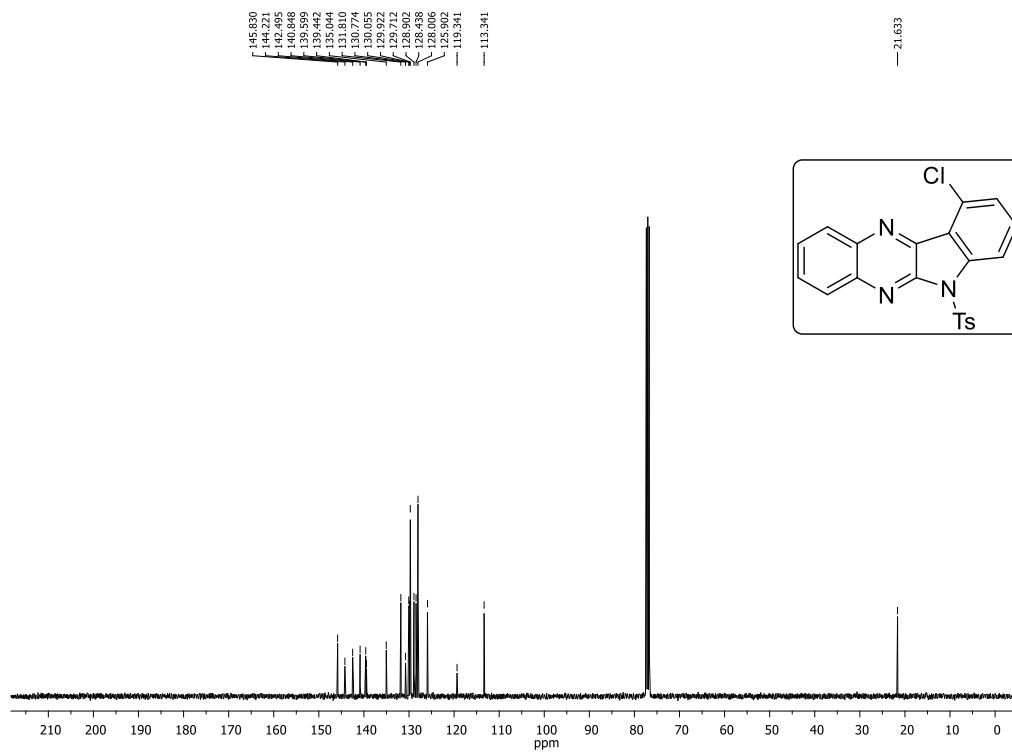

# 10-Methyl-6-tosyl-6H-indolo[2,3-b]quinoxaline (5h)

$^1\text{H}$  NMR (400 MHz,  $\text{CDCl}_3$ )

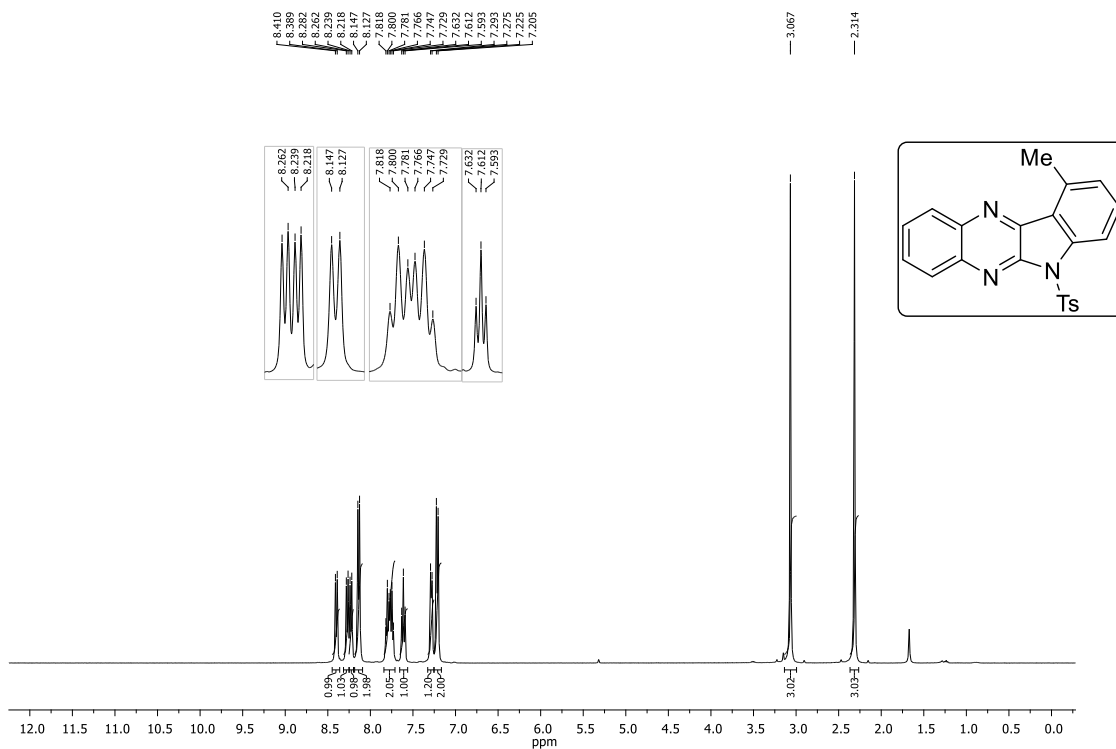

$^{13}\text{C}\{^1\text{H}\}$  NMR (100 MHz,  $\text{CDCl}_3$ )

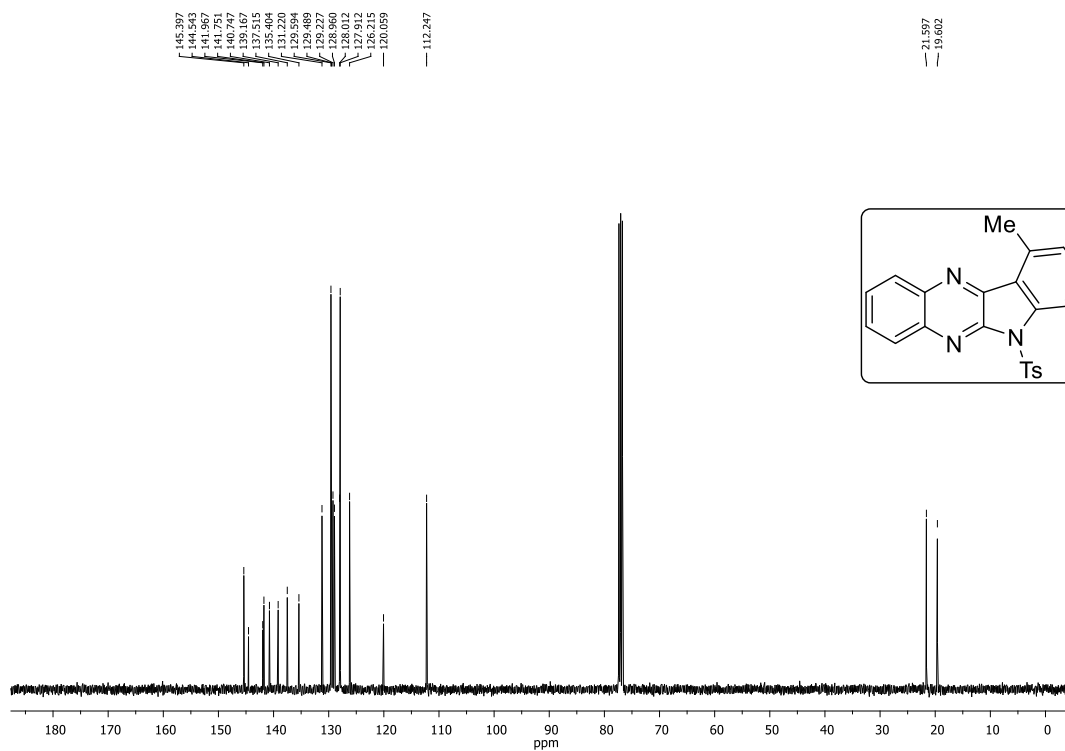

# 10-Methoxy-6-tosyl-6H-indolo[2,3-b]quinoxaline (5i)

$^1\text{H}$  NMR (400 MHz,  $\text{CDCl}_3$ )

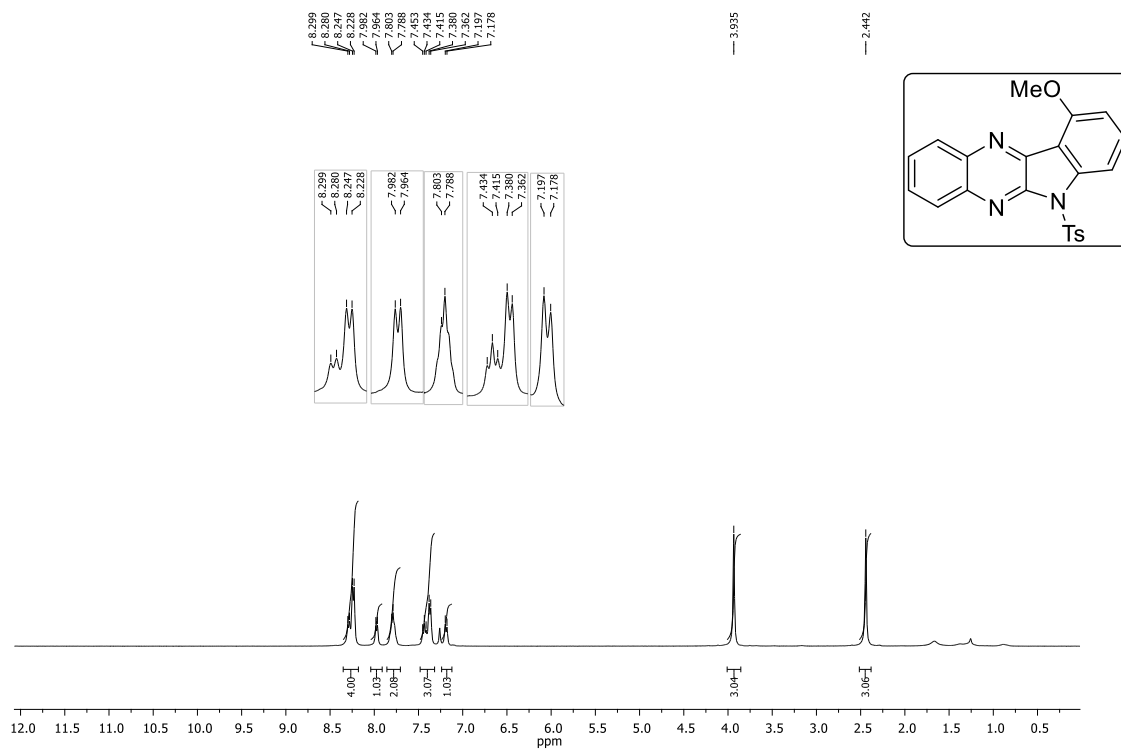

$^{13}\text{C}\{^1\text{H}\}$  NMR (100 MHz,  $\text{CDCl}_3$ )

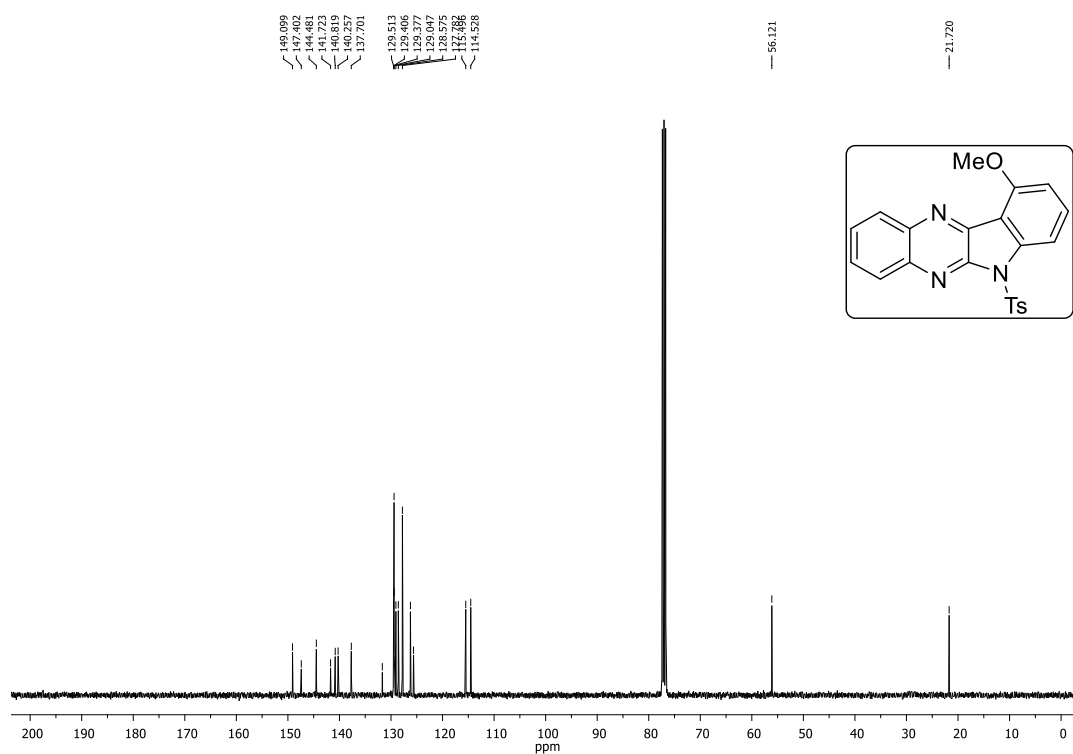

# 9-Fluoro-6-tosyl-6H-indolo[2,3-b]quinoxaline (5j)

$^1\text{H}$  NMR (400 MHz,  $\text{CDCl}_3$ )

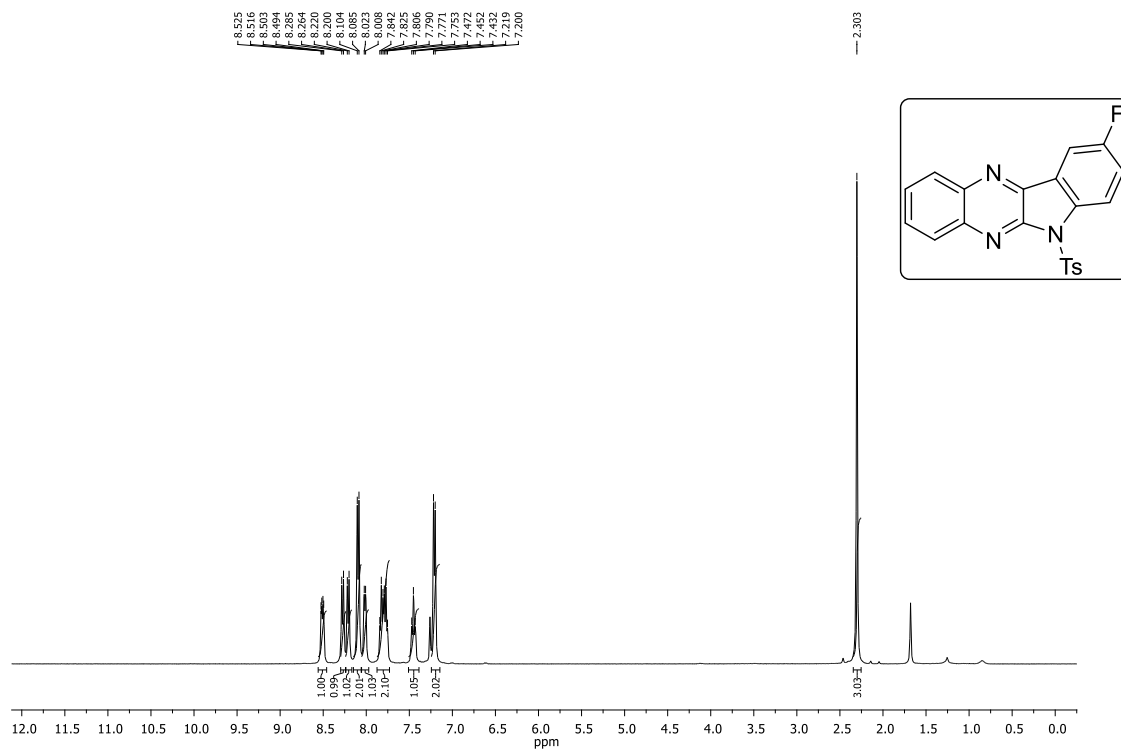

$^{13}\text{C}\{^1\text{H}\}$  NMR (100 MHz,  $\text{CDCl}_3$ )

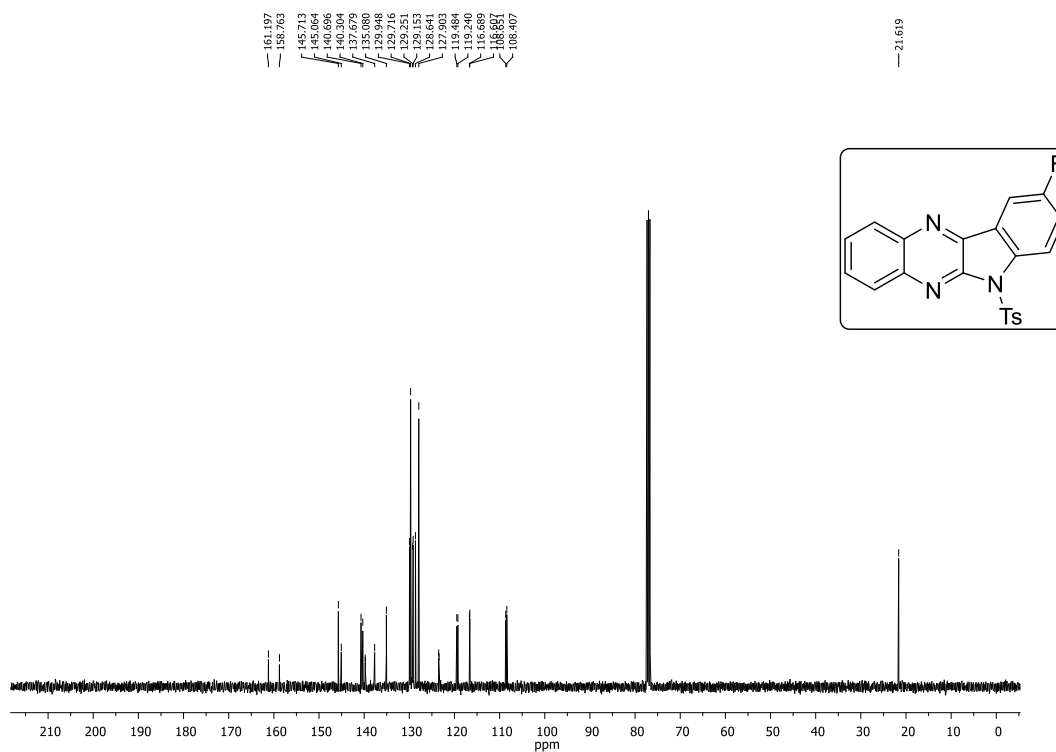

$^{19}\text{F}$  NMR (377 MHz,  $\text{CDCl}_3$ )

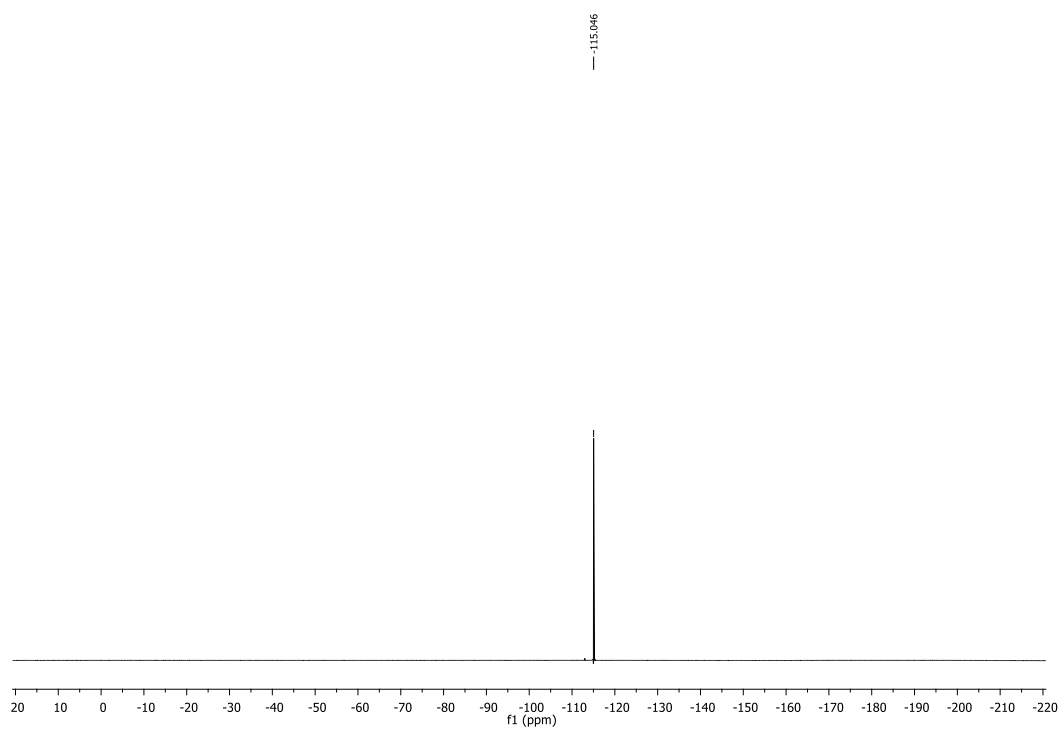

## 9-Methoxy-6-tosyl-6*H*-indolo[2,3-*b*]quinoxaline (5k)

$^1\text{H}$  NMR (400 MHz,  $\text{CDCl}_3$ )

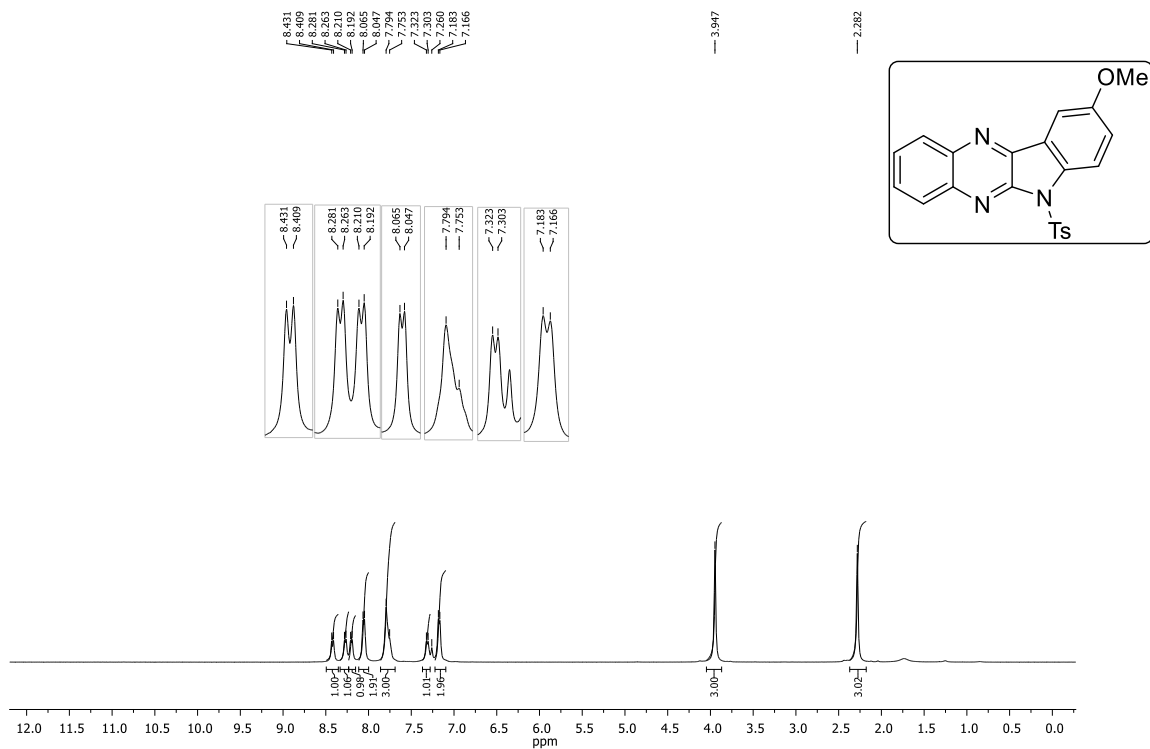

$^{13}\text{C}\{^1\text{H}\}$  NMR (100 MHz,  $\text{CDCl}_3$ )

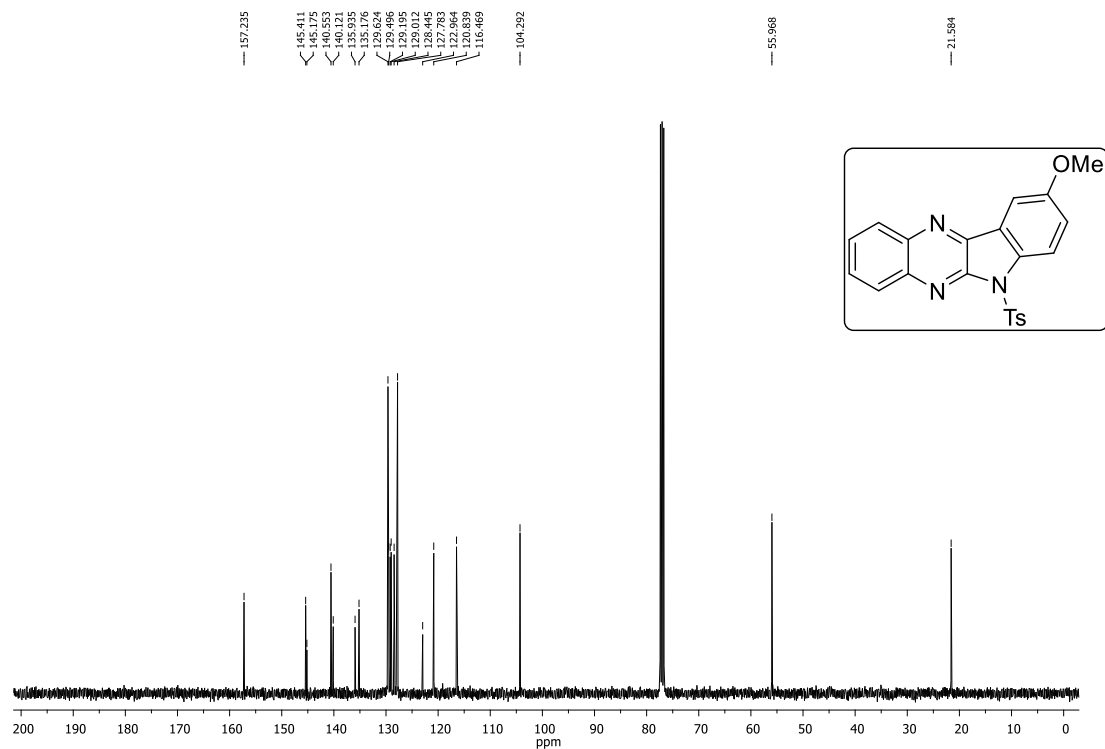



**7-Methyl-6-tosyl-6*H*-indolo[2,3-*b*]quinoxaline/9-methyl-6-tosyl-6*H*-indolo[2,3-*b*]quinoxaline (1:1) (5I)**

<sup>1</sup>H NMR (400 MHz, CDCl<sub>3</sub>)

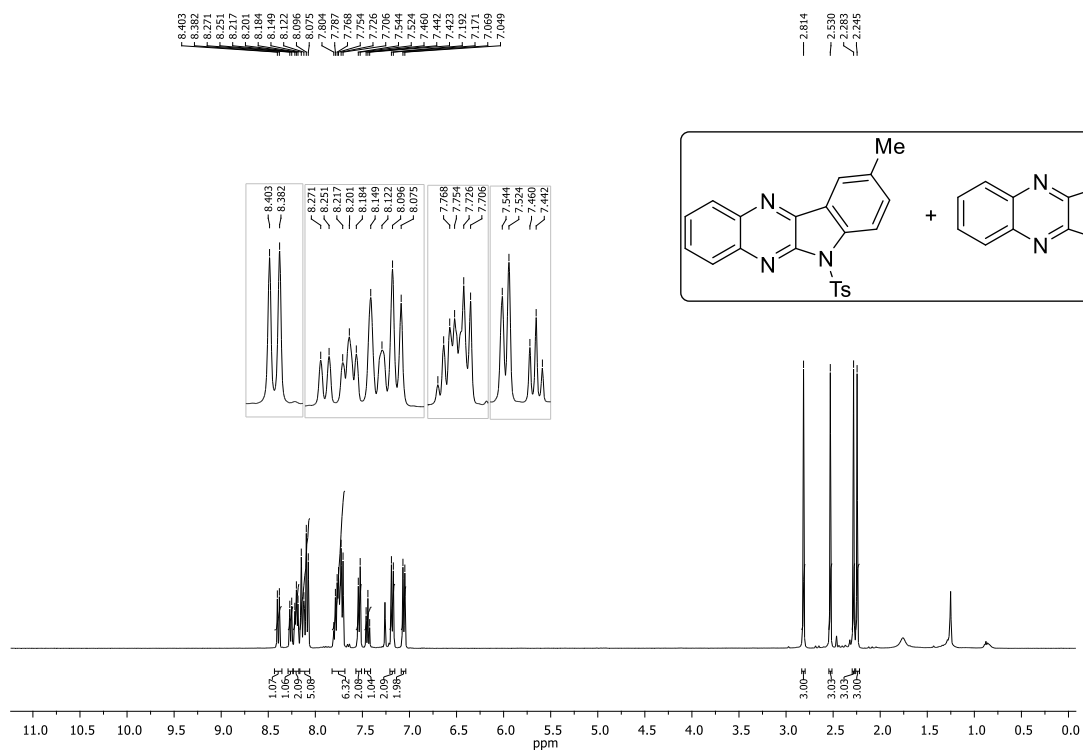

<sup>13</sup>C{<sup>1</sup>H} NMR (100 MHz, CDCl<sub>3</sub>)

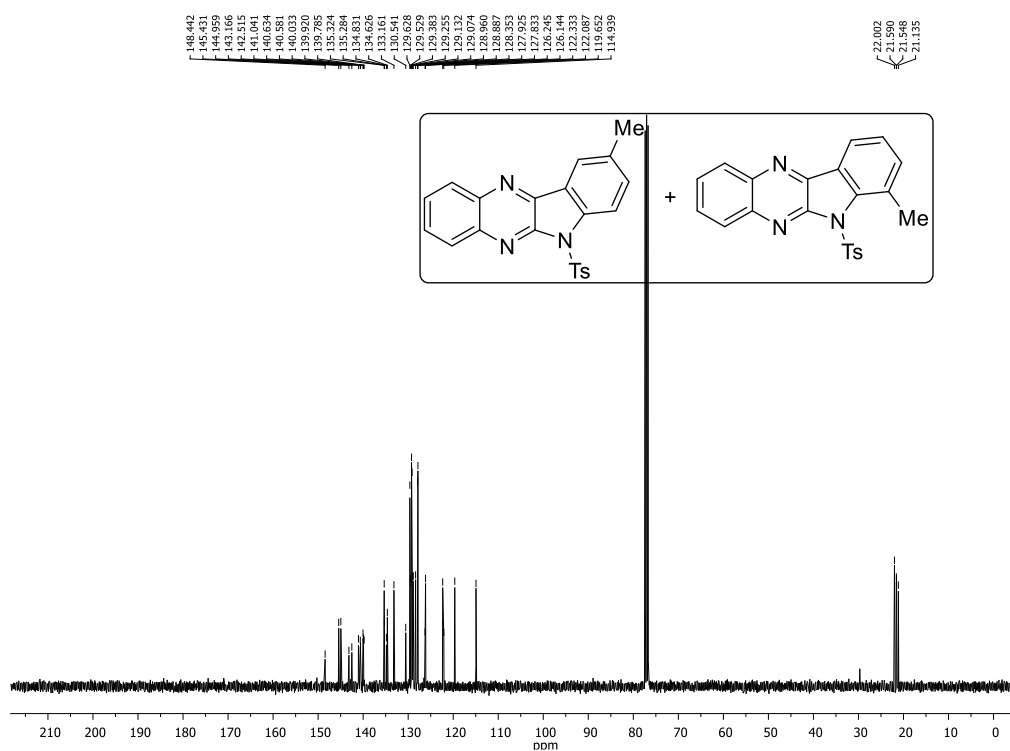

# 7,9-Dimethyl-6-tosyl-6H-indolo[2,3-b]quinoxaline (5m)

$^1\text{H}$  NMR (400 MHz,  $\text{CDCl}_3$ )

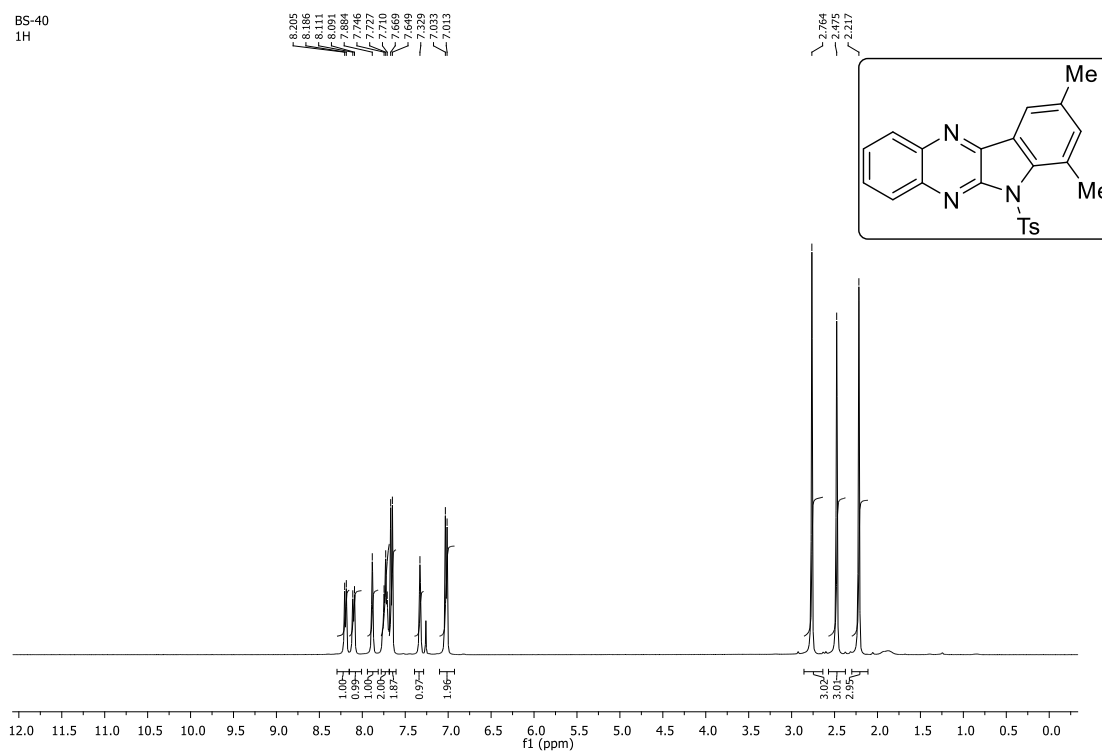

$^{13}\text{C}\{^1\text{H}\}$  NMR (100 MHz,  $\text{CDCl}_3$ )

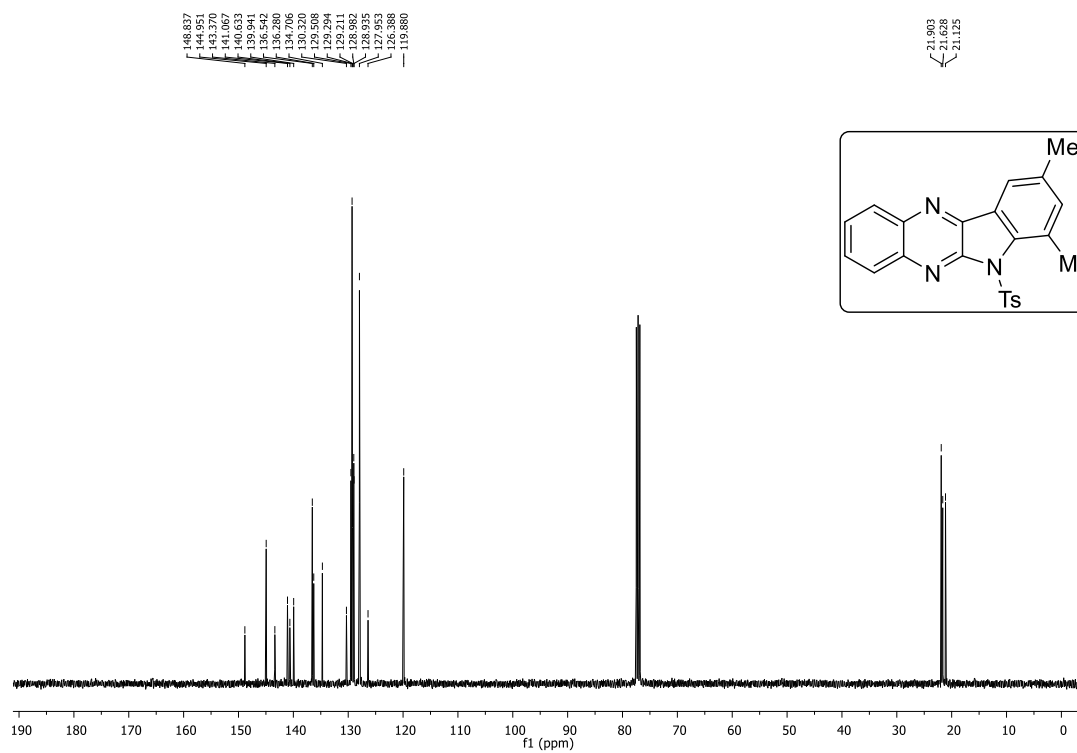

# 7-Tosyl-7H-benzo[4,5]indolo[2,3-b]quinoxaline (5o)

$^1\text{H}$  NMR (700 MHz,  $\text{CDCl}_3$ )

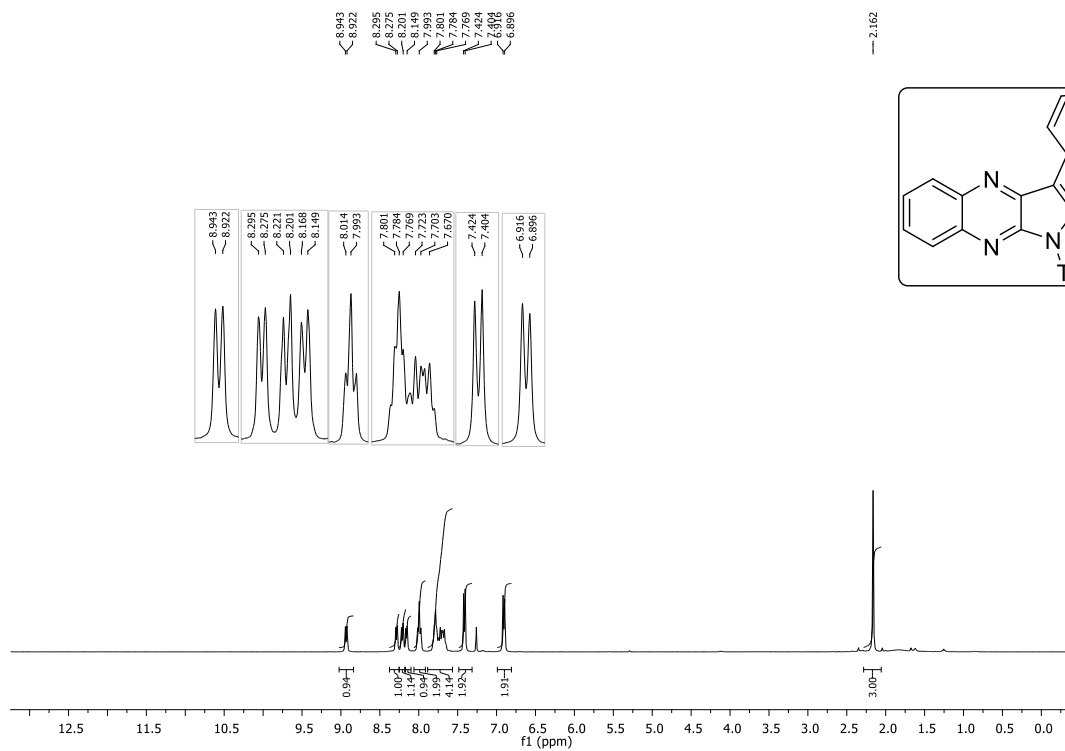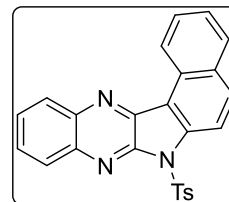

$^{13}\text{C}\{^1\text{H}\}$  NMR (175 MHz,  $\text{CDCl}_3$ )

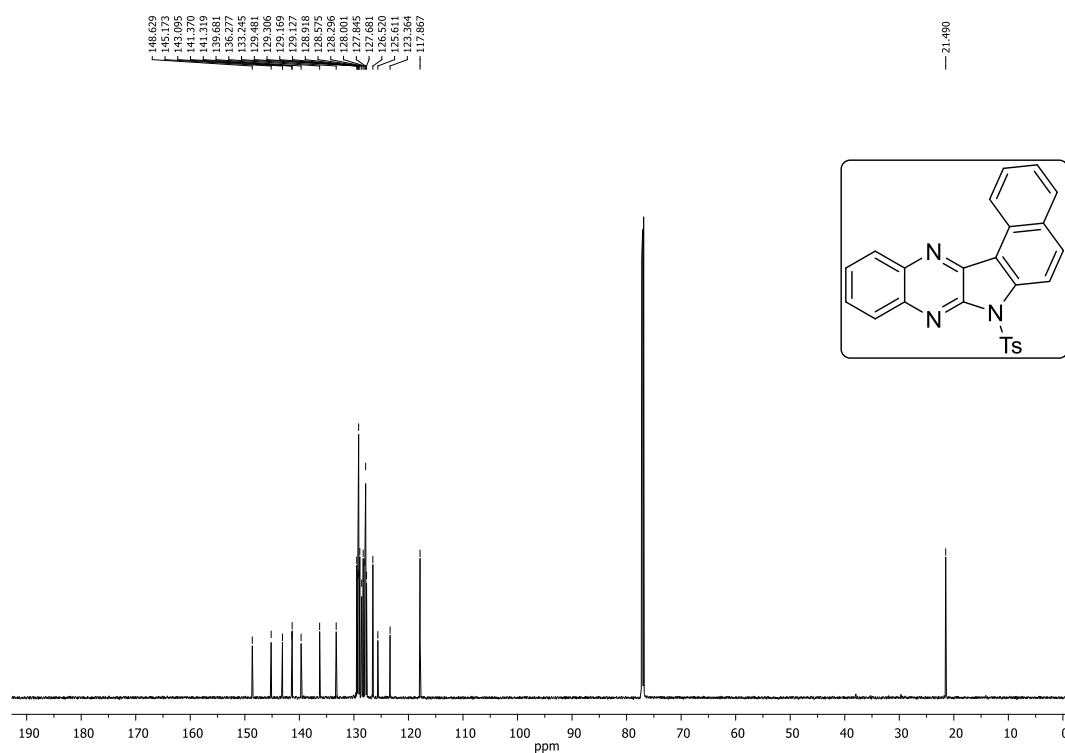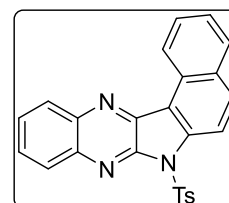

# 13-Tosyl-13*H*-benzo[6,7]indolo[2,3-*b*]quinoxaline (5p)

$^1\text{H}$  NMR (400 MHz,  $\text{CDCl}_3$ )

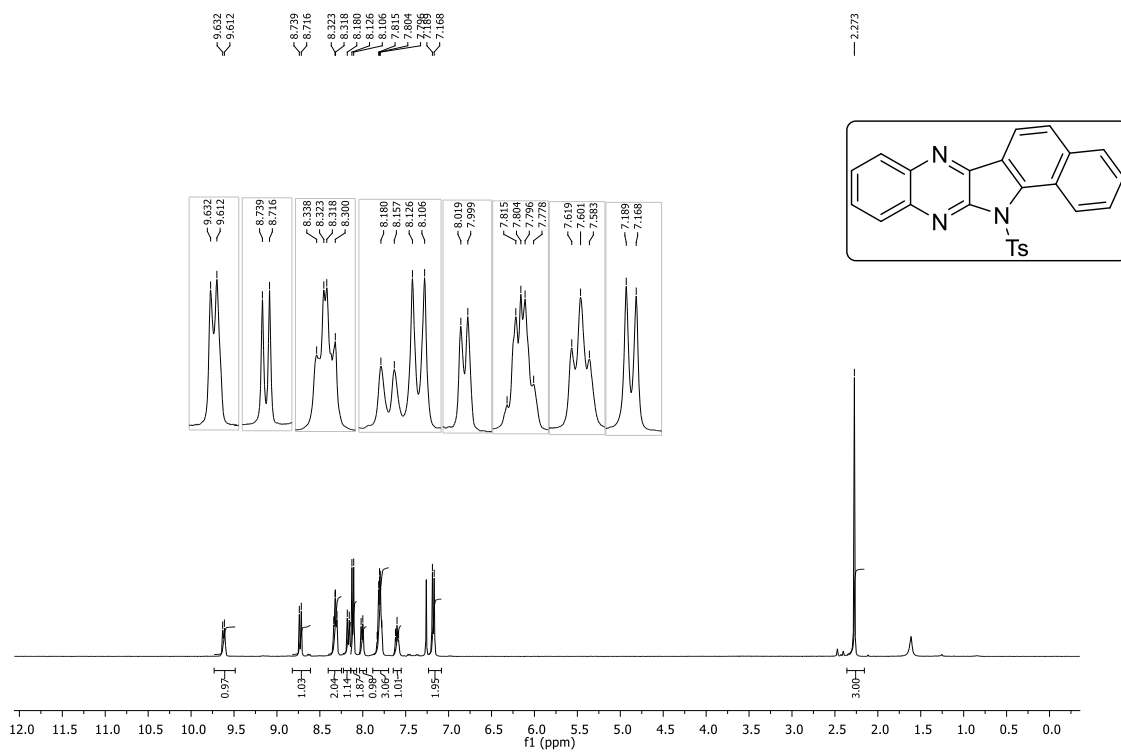

$^{13}\text{C}\{^1\text{H}\}$  NMR (100 MHz,  $\text{CDCl}_3$ )

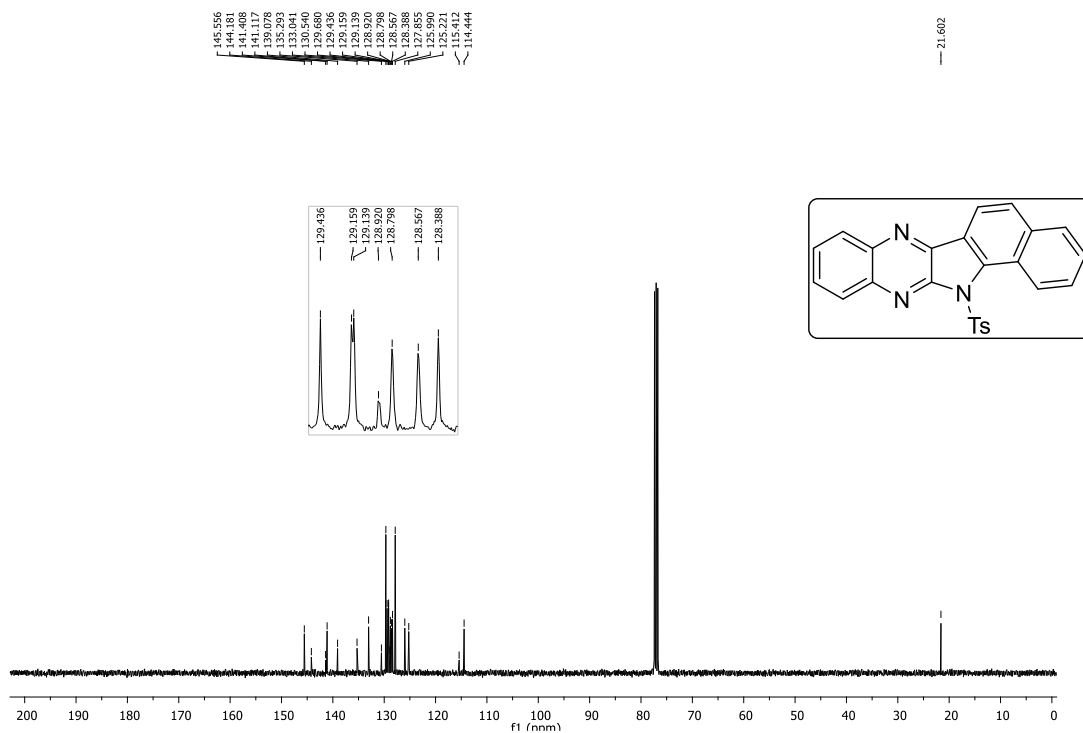

## 2,3-Dichloro-6-tosyl-6H-indolo[2,3-b]quinoxaline (5q)

$^1\text{H}$  NMR (400 MHz,  $\text{CDCl}_3$ )

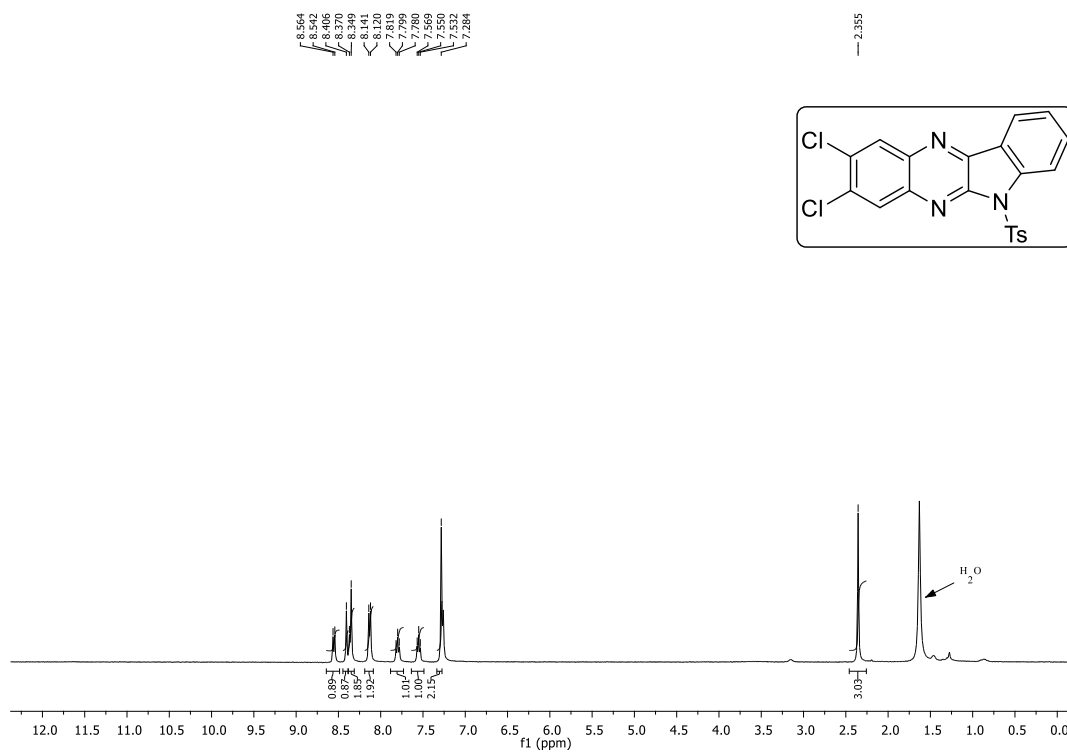

$^{13}\text{C}\{^1\text{H}\}$  NMR (100 MHz,  $\text{CDCl}_3$ )

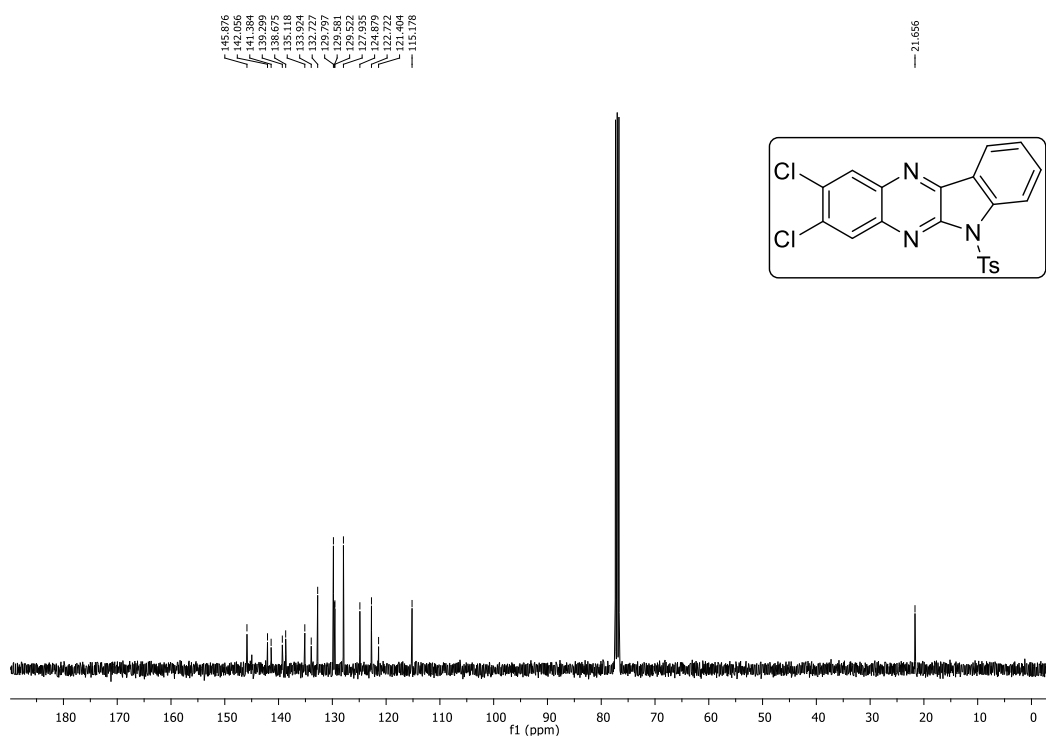

## 2,3-Dichloro-10-methyl-6-tosyl-6H-indolo[2,3-b]quinoxaline (5r)

$^1\text{H}$  NMR (400 MHz,  $\text{CDCl}_3$ )

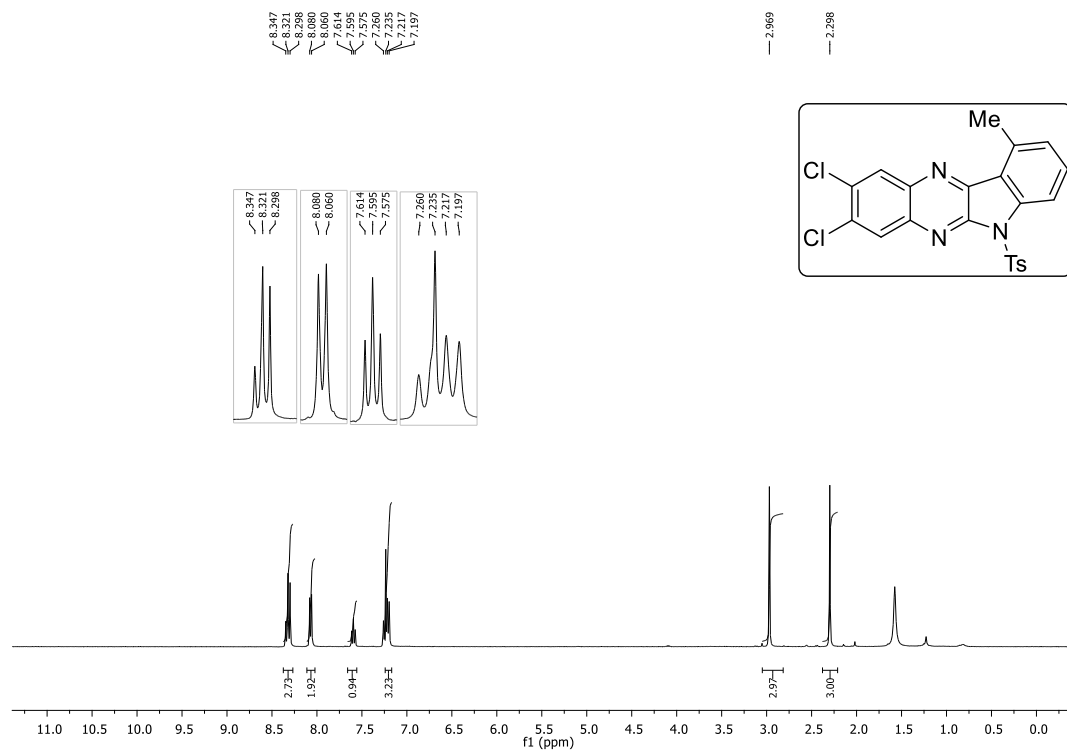

$^{13}\text{C}\{^1\text{H}\}$  NMR (175 MHz,  $\text{CDCl}_3$ )

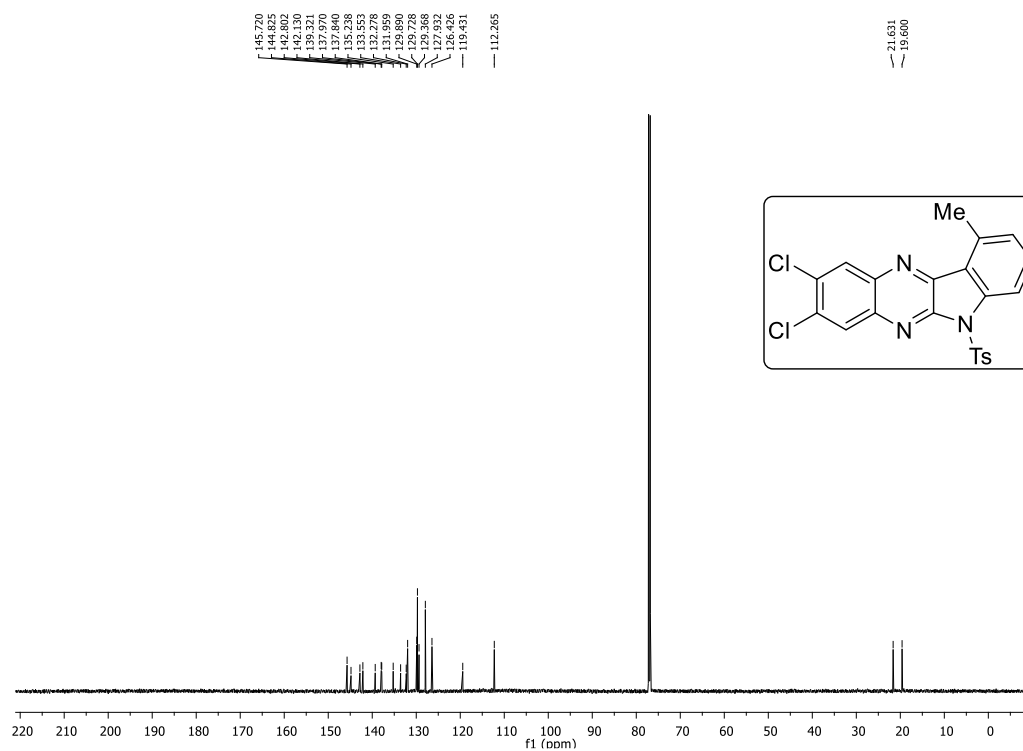

## 2,3-Dichloro-8-methyl-6-tosyl-6*H*-indolo[2,3-*b*]quinoxaline (5s)

$^1\text{H}$  NMR (400 MHz,  $\text{CDCl}_3$ )

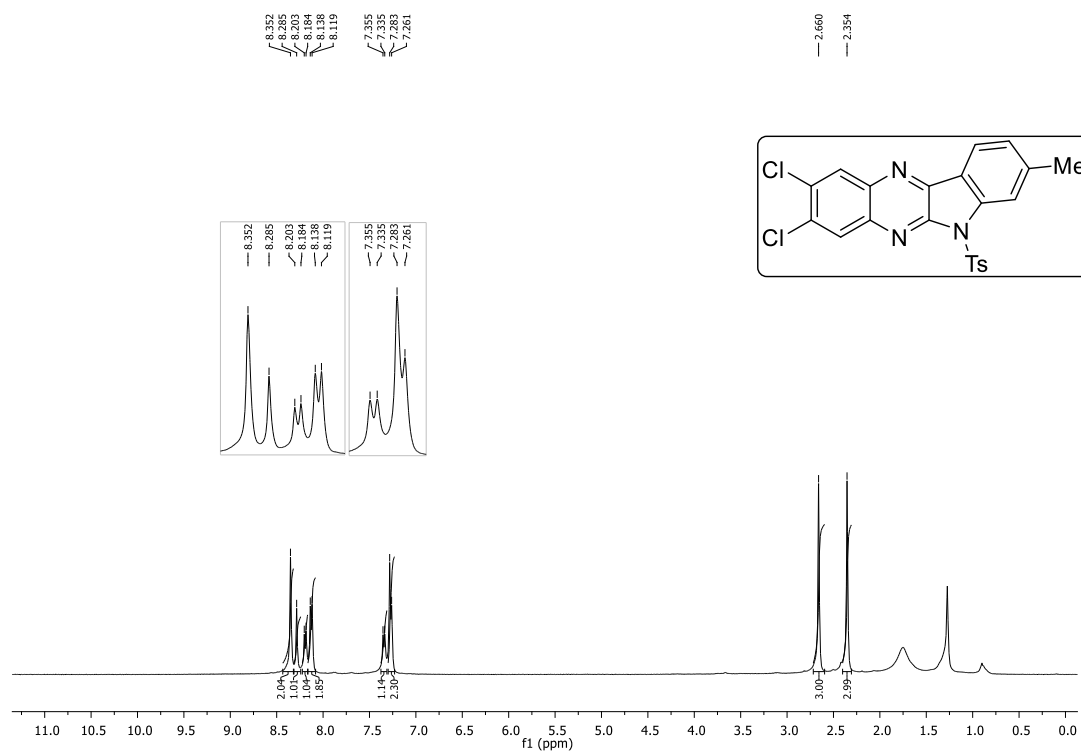

$^{13}\text{C}\{^1\text{H}\}$  NMR (100 MHz,  $\text{CDCl}_3$ )

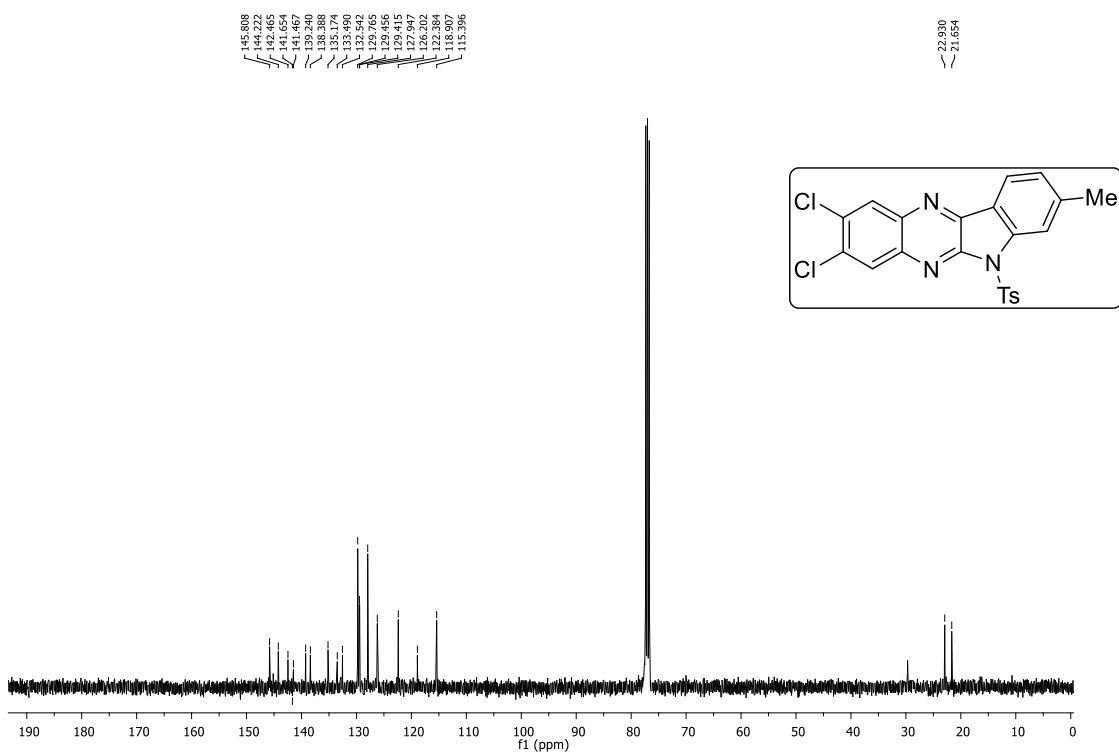

# 5-Tosyl-5H-[1,3]dioxolo[4',5':5,6]indolo[2,3-b]quinoxaline (5t)

$^1\text{H}$  NMR (400 MHz,  $\text{CDCl}_3$ )

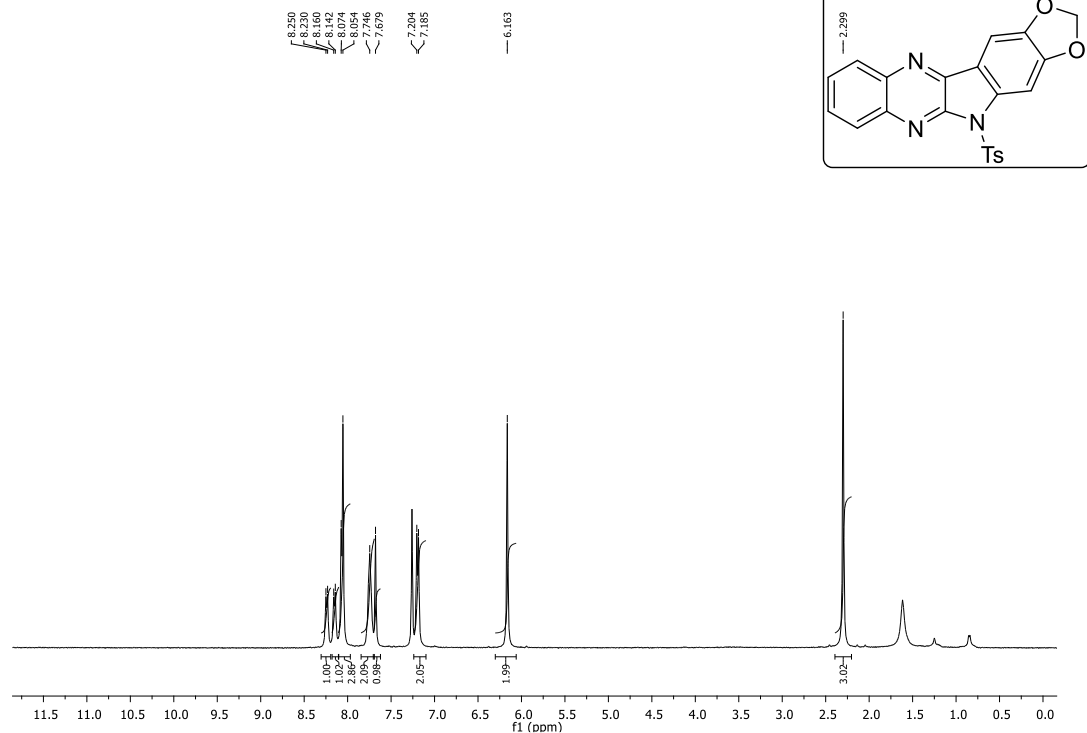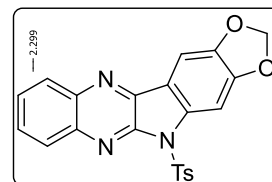

$^{13}\text{C}\{^1\text{H}\}$  NMR (100 MHz,  $\text{CDCl}_3$ )

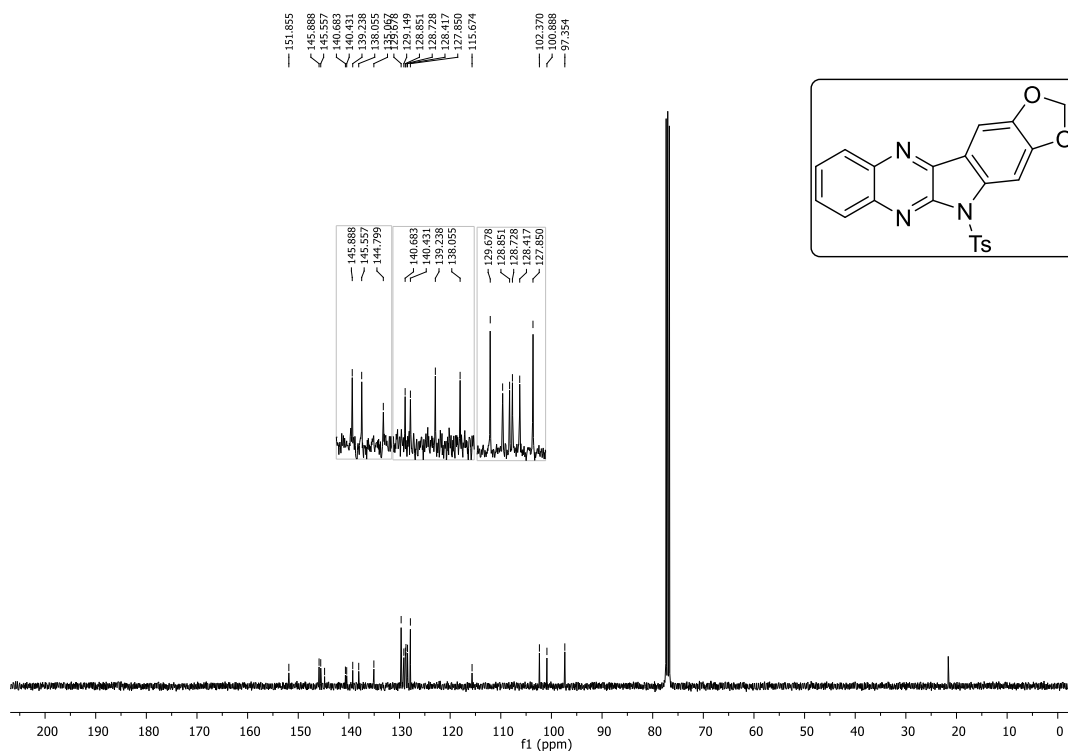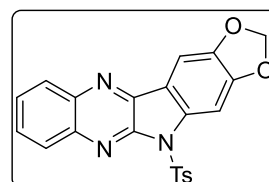



# 2-((1,1,1,3,3,3-Hexafluoropropan-2-yl)oxy)-5-tosyl-5H-[1,3]dioxolo[4',5':5,6]indolo[2,3-b]quinoxaline (6t)

$^1\text{H}$  NMR (400 MHz,  $\text{CDCl}_3$ )

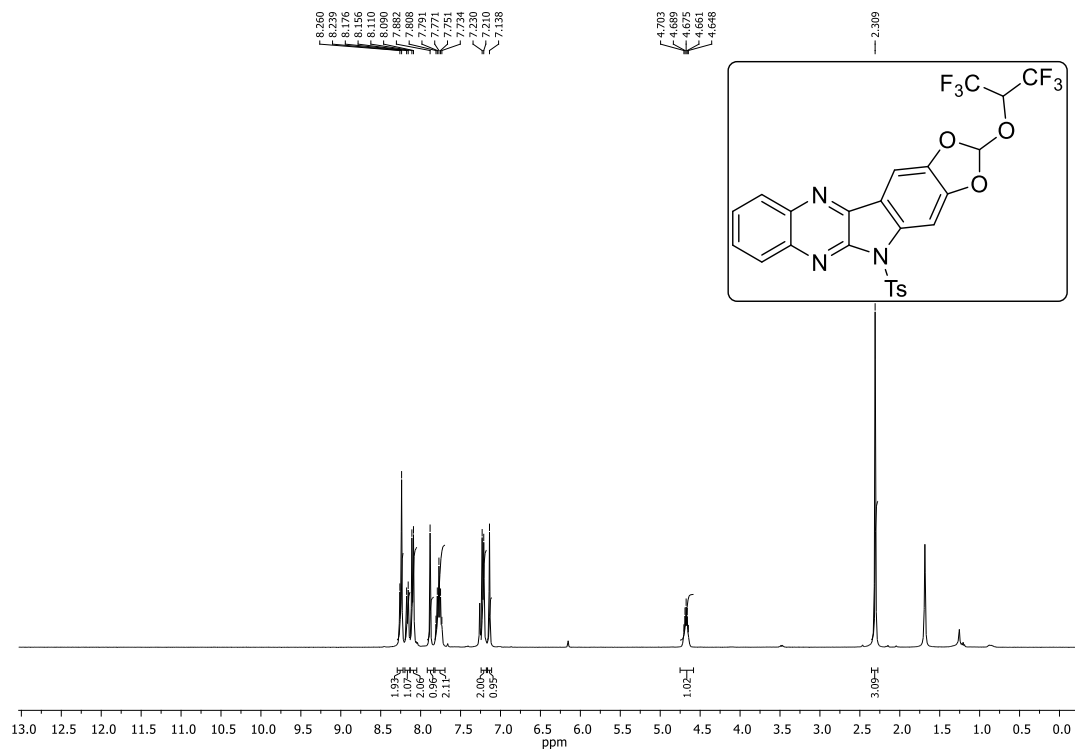

$^{13}\text{C}\{^1\text{H}\}$  NMR (100 MHz,  $\text{CDCl}_3$ )

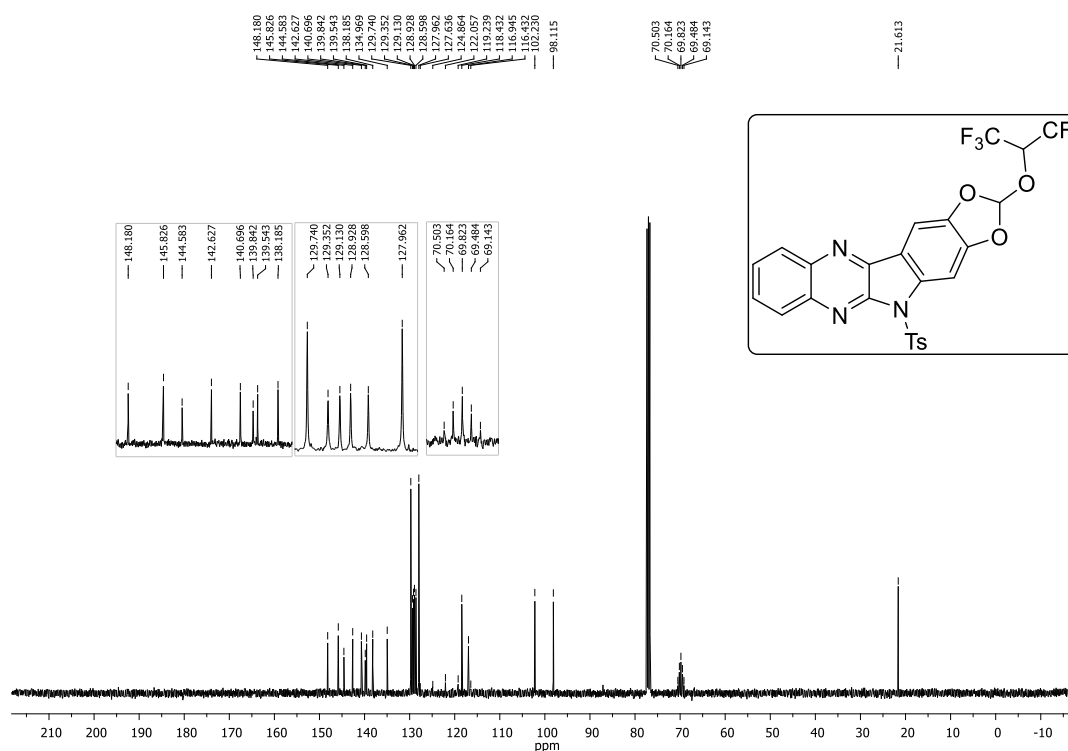

$^{19}\text{F}$  NMR (377 MHz,  $\text{CDCl}_3$ )

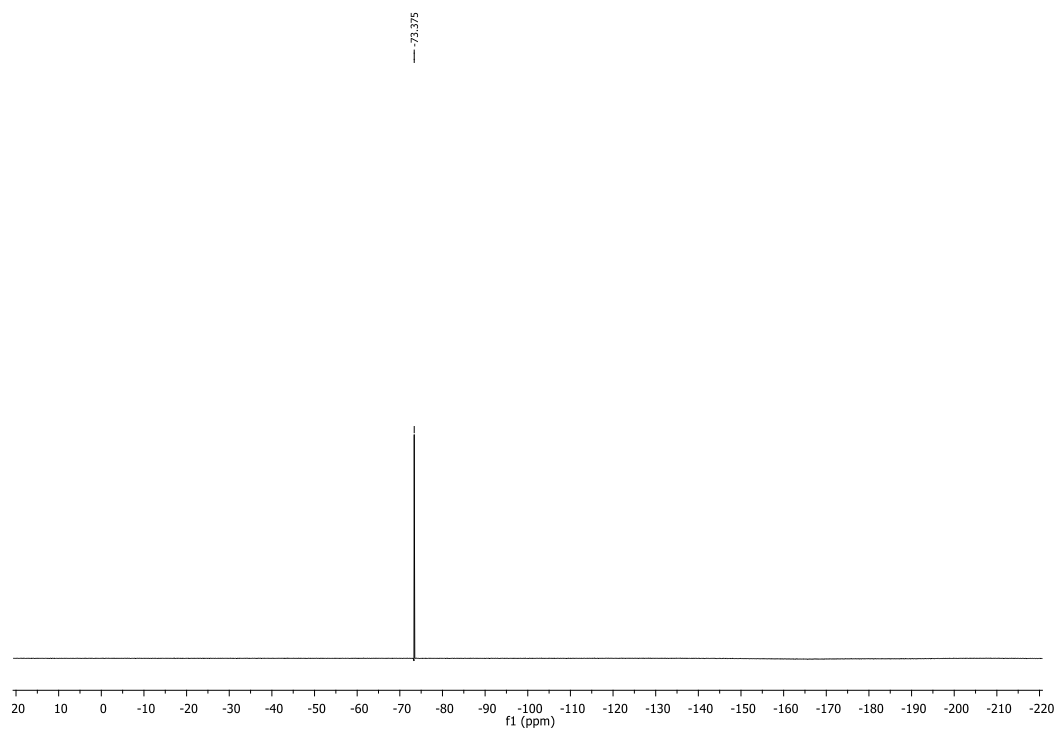

**8,9-dichloro-2-((1,1,1,3,3,3-hexafluoropropan-2-yl)oxy)-5-tosyl-5H-[1,3]dioxolo[4',5':5,6]indolo[2,3-b]quinoxaline (6u)**

$^1\text{H}$  NMR (400 MHz,  $\text{CDCl}_3$ )

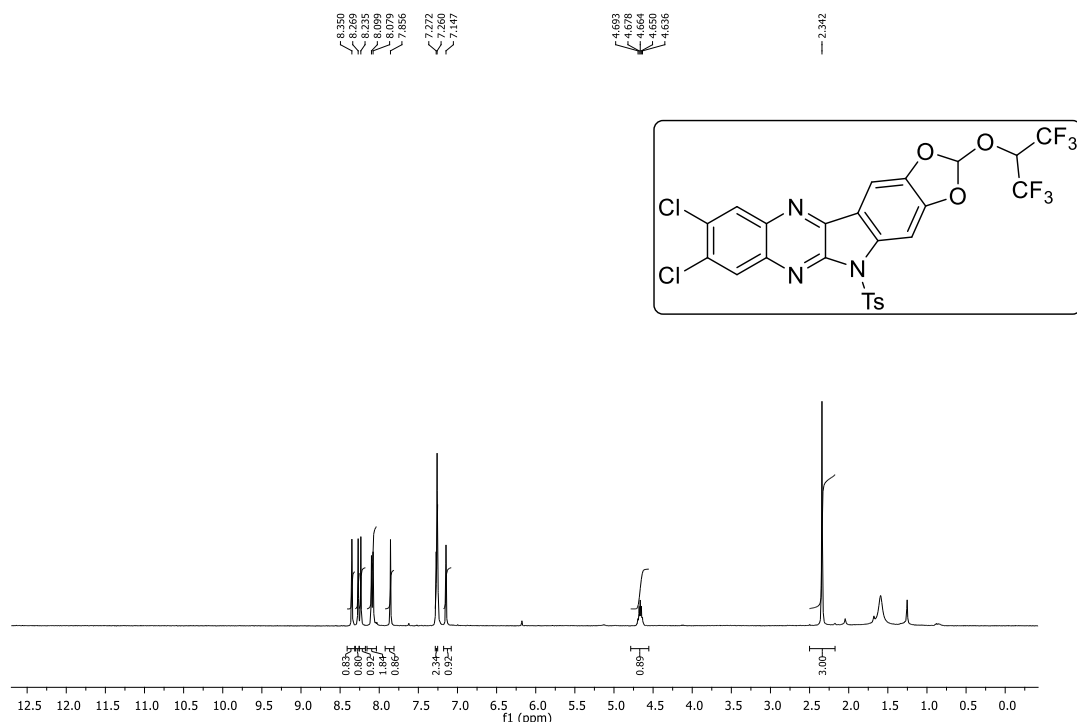

$^{13}\text{C}$  NMR (175 MHz,  $\text{CDCl}_3$ )

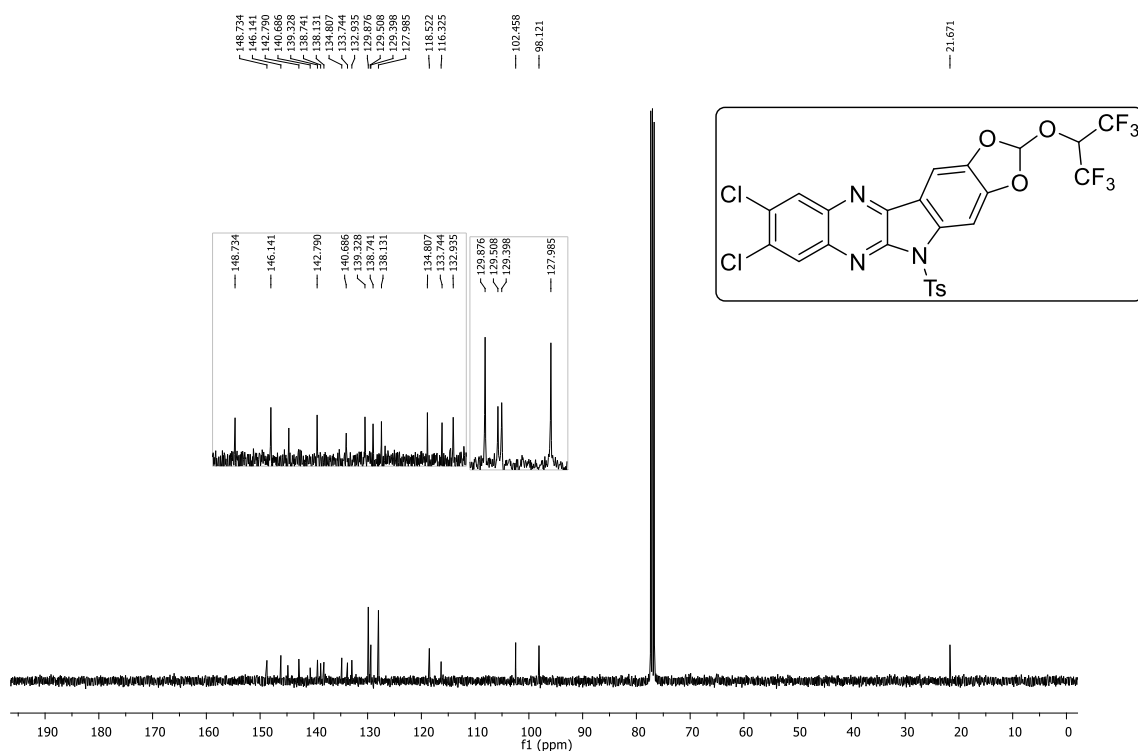

$^{19}\text{F}$  NMR (377 MHz,  $\text{CDCl}_3$ )

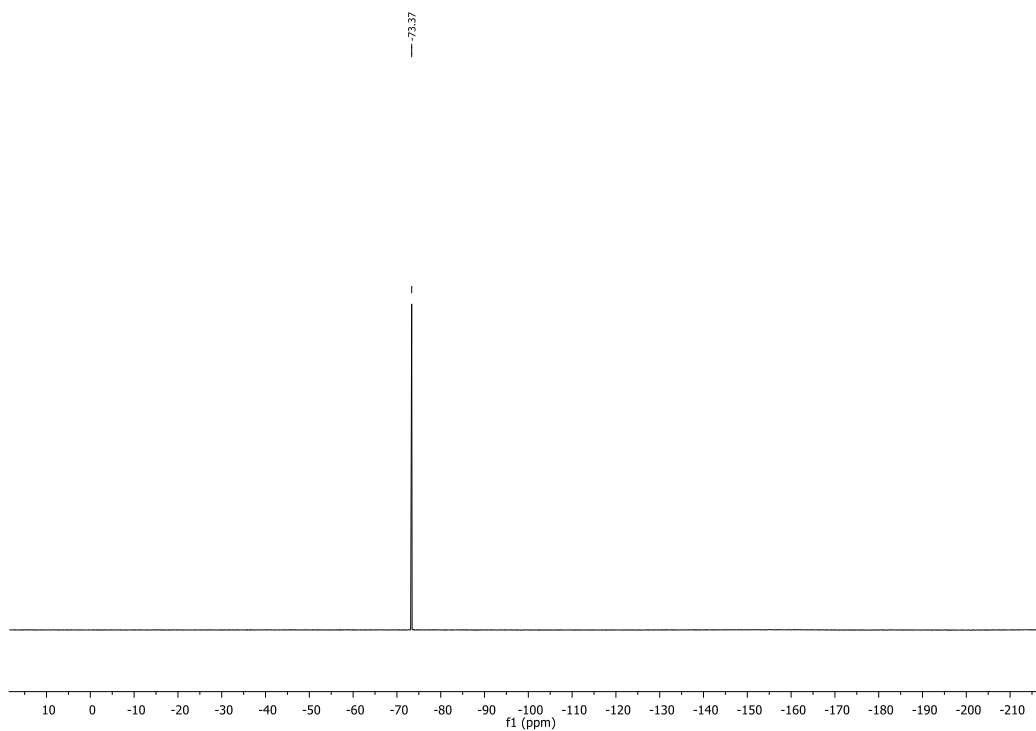

***N*-(4-Iodophenyl)-4-methyl-*N*-(3-(4-(trifluoromethyl)phenyl)quinoxalin-2-yl)benzenesulfonamide (7v)**

$^1\text{H}$  NMR (400 MHz,  $\text{CDCl}_3$ )

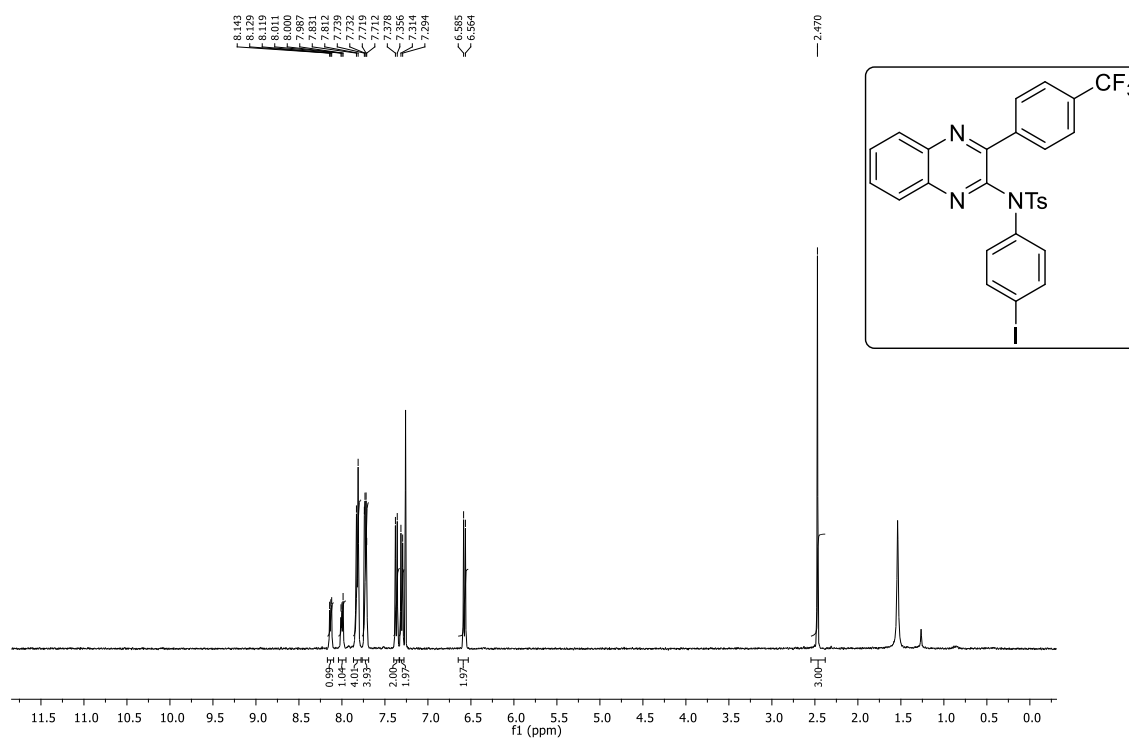

$^{13}\text{C}\{^1\text{H}\}$  NMR (175 MHz,  $\text{CDCl}_3$ )

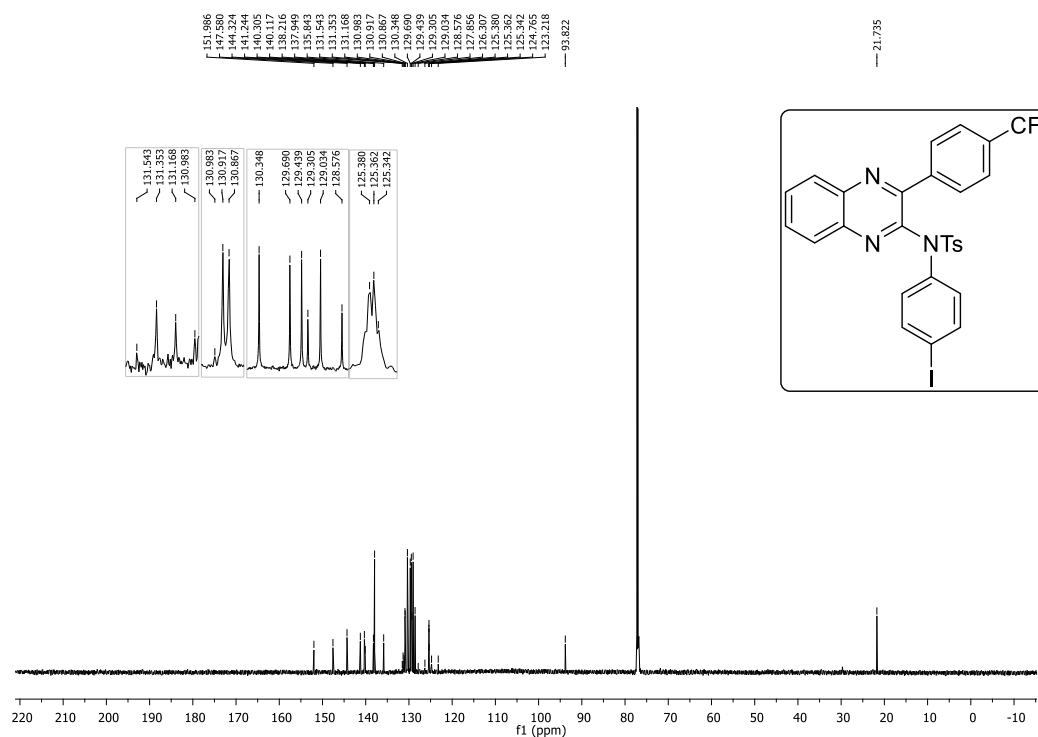

$^{19}\text{F}$  NMR (377 MHz,  $\text{CDCl}_3$ )

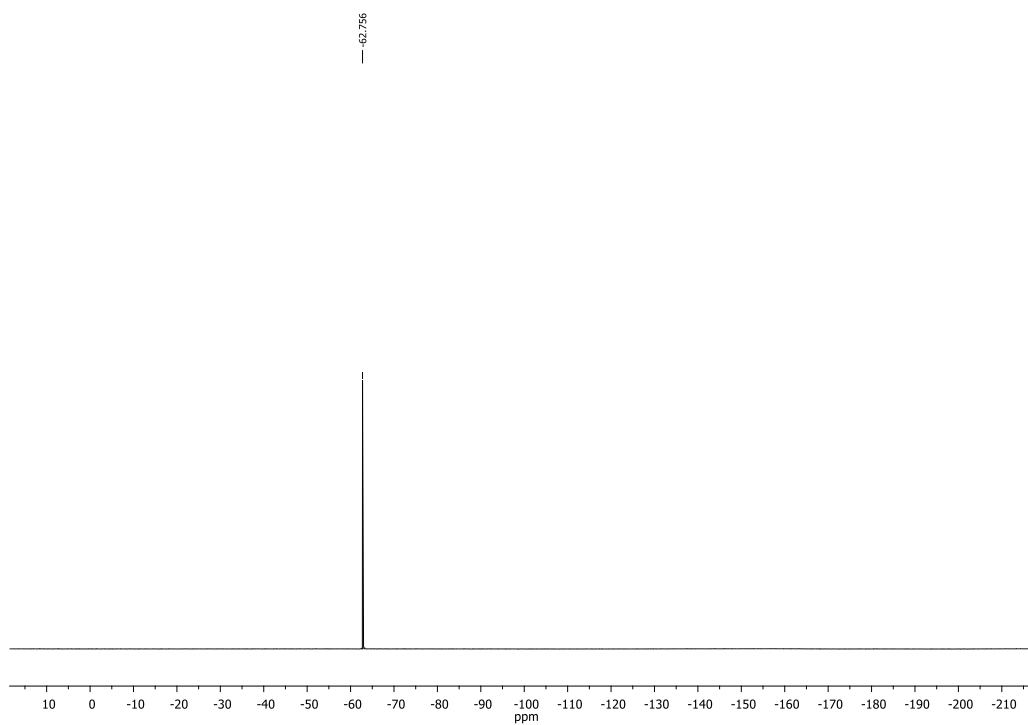

***N*-(4-Iodophenyl)-4-methyl-*N*-(3-(2,4,5-trifluorophenyl)quinoxalin-2-yl)benzenesulfonamide (7w)**

$^1\text{H}$  NMR (400 MHz,  $\text{CDCl}_3$ )

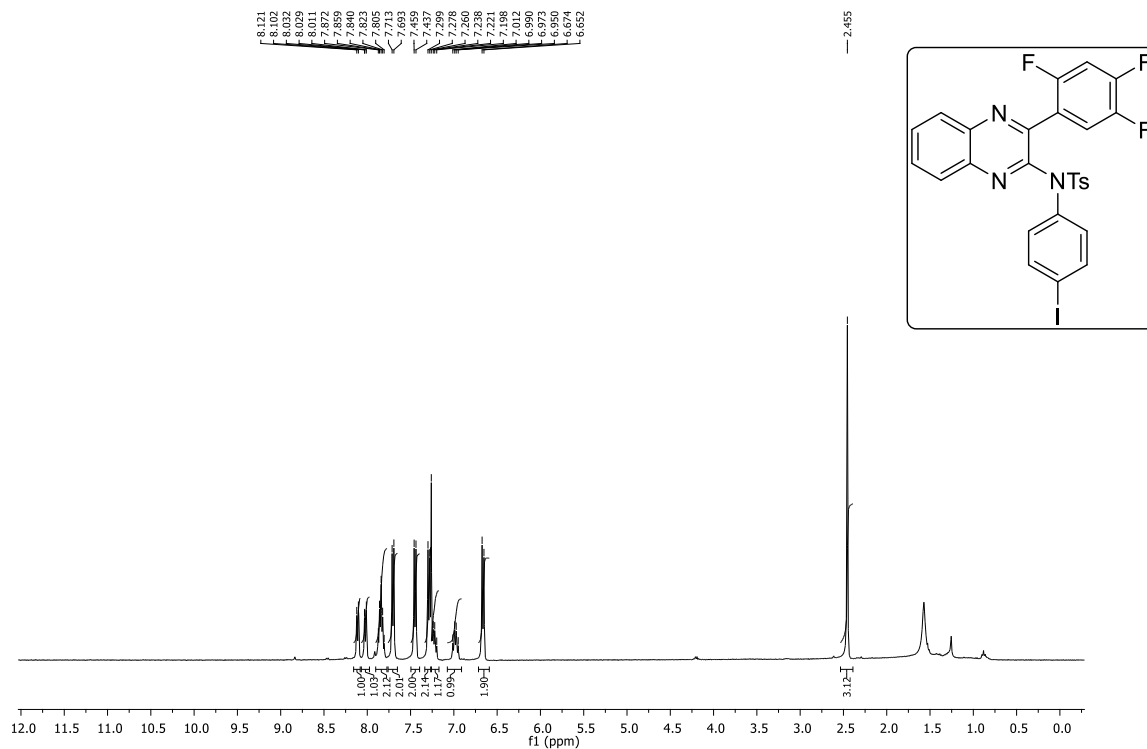

$^{13}\text{C}\{^1\text{H}\}$  NMR (175 MHz,  $\text{CDCl}_3$ )

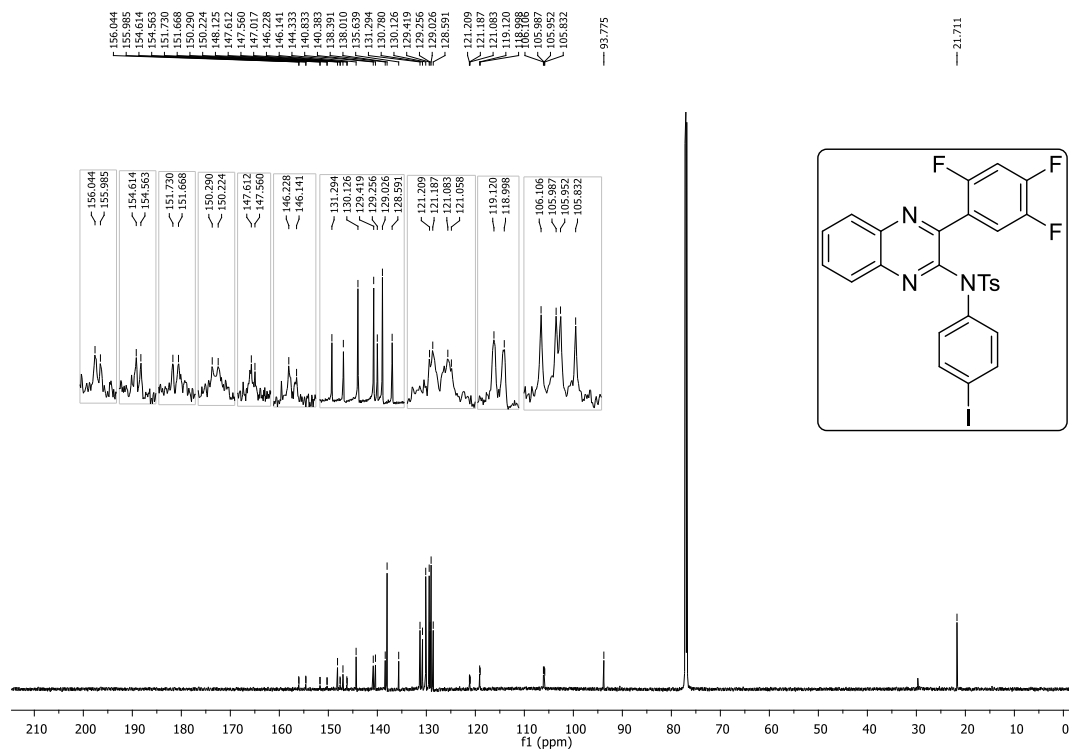

$^{19}\text{F}$  NMR (377 MHz,  $\text{CDCl}_3$ )

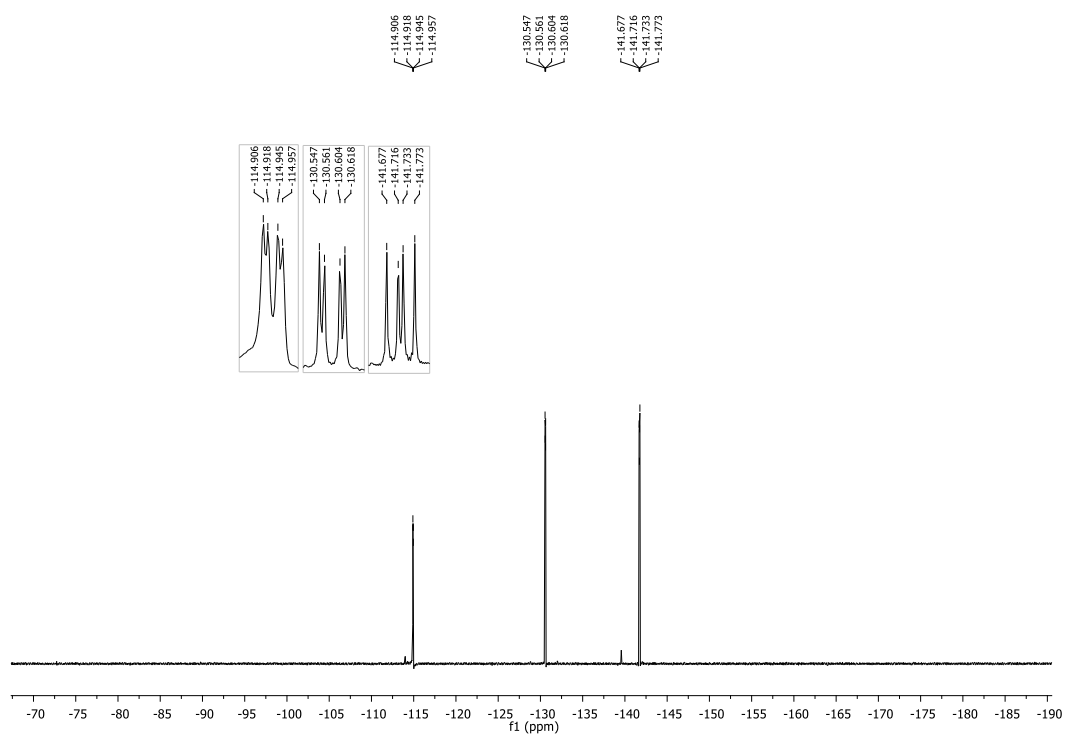



# 8-phenyl-6-tosyl-6H-indolo[2,3-b]quinoxaline (8)

$^1\text{H}$  NMR (400 MHz,  $\text{CDCl}_3$ )

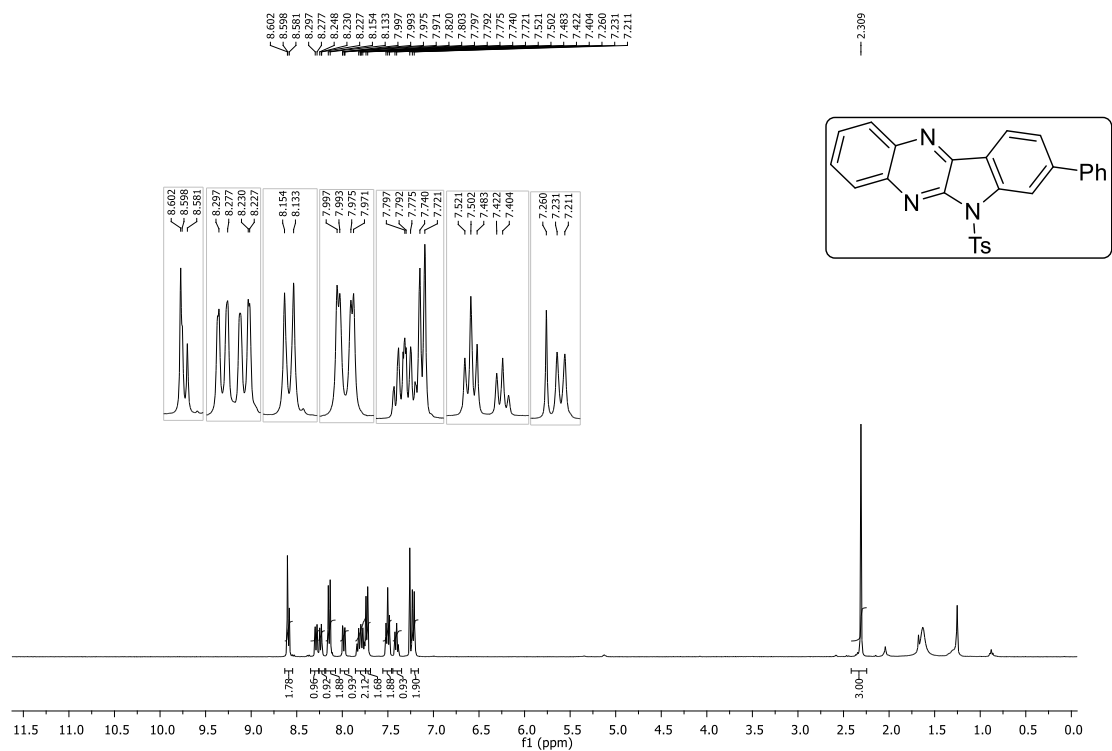

$^{13}\text{C}\{^1\text{H}\}$  NMR (100 MHz,  $\text{CDCl}_3$ )

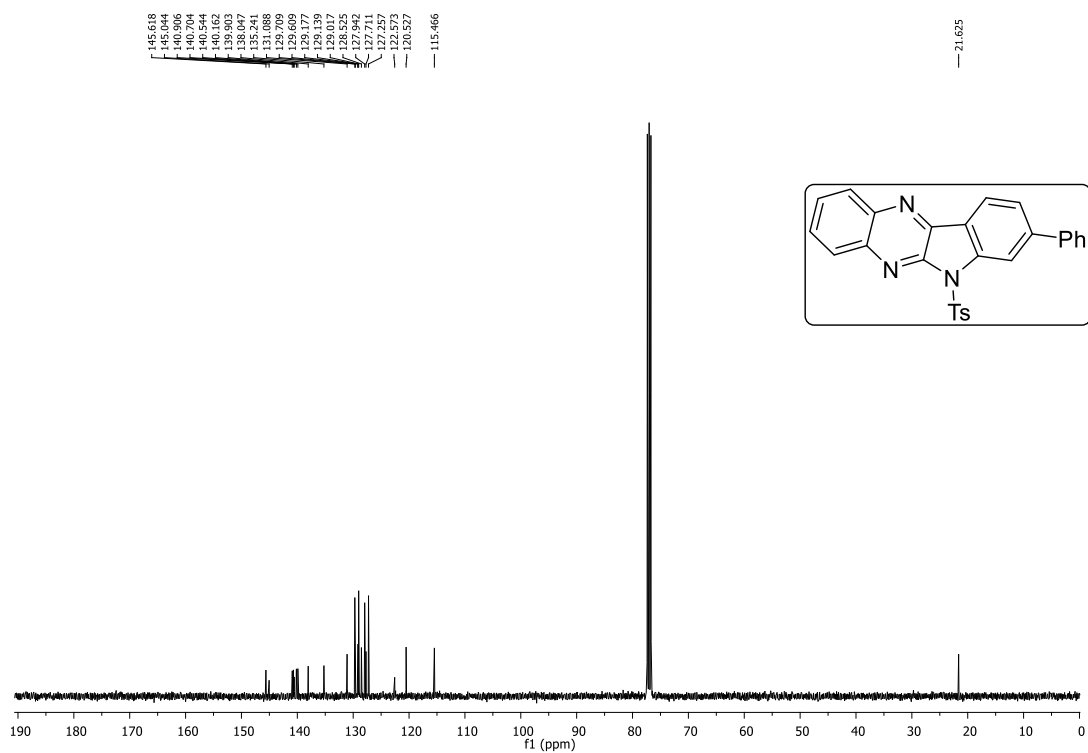

# 6H-Indolo[2,3-b]quinoxaline (9a)

$^1\text{H}$  NMR (400 MHz,  $\text{CDCl}_3$ )

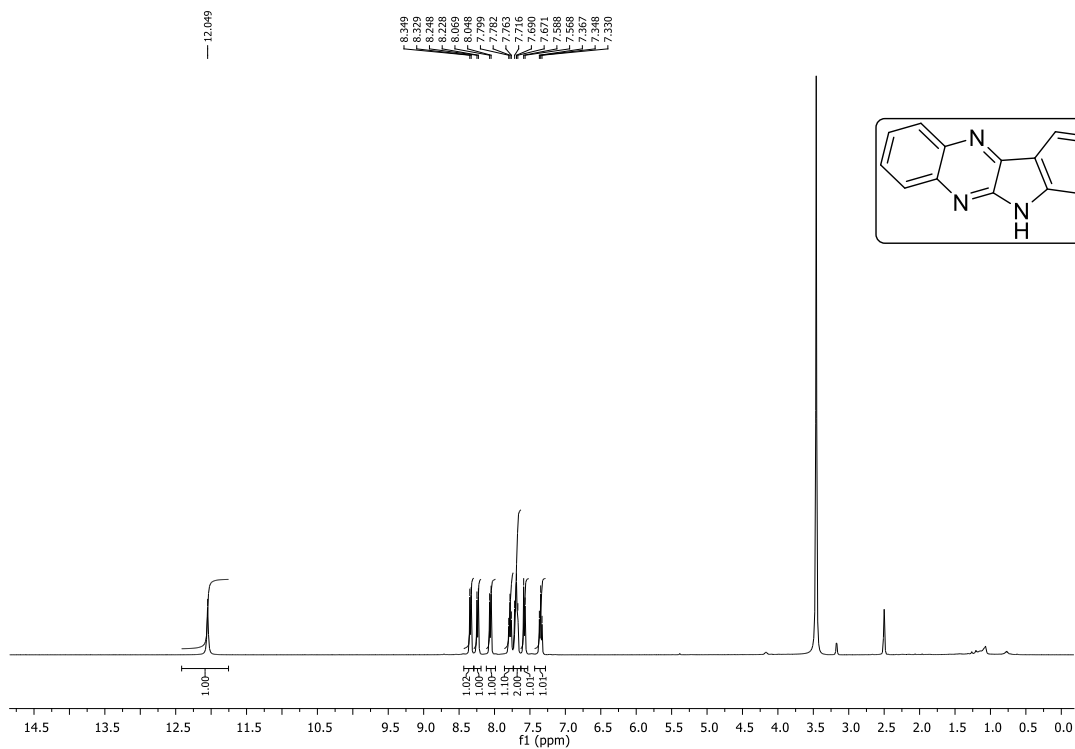

$^{13}\text{C}\{^1\text{H}\}$  NMR (100 MHz,  $\text{CDCl}_3$ )

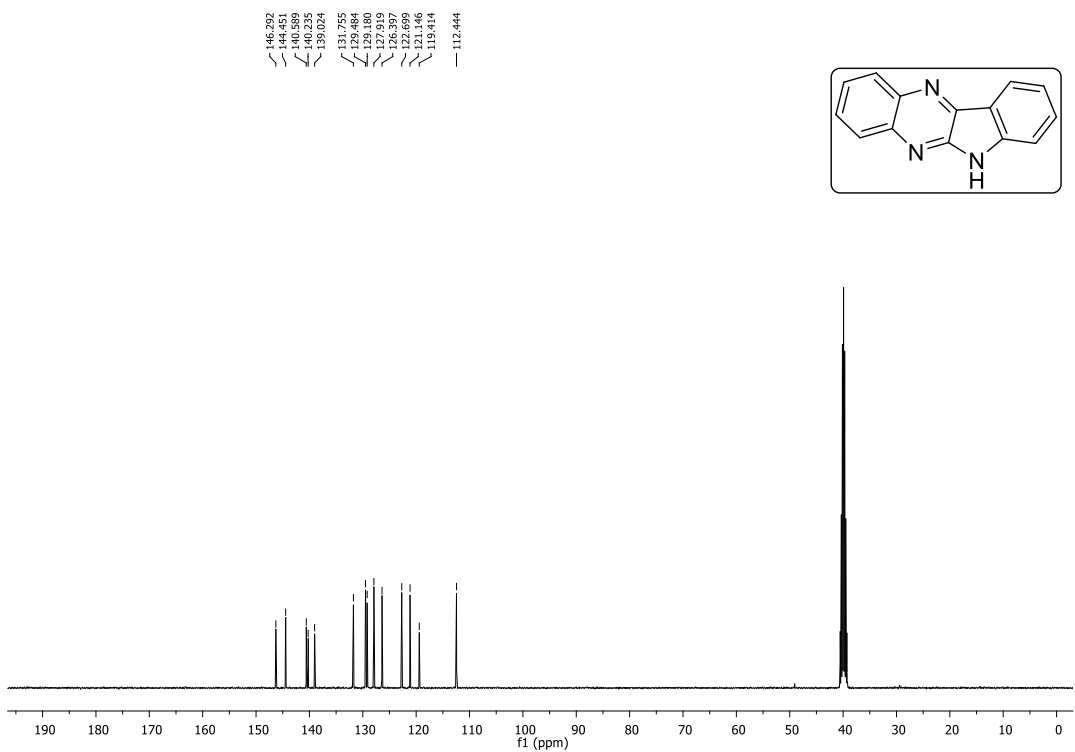

# 8-Bromo-6H-indolo[2,3-b]quinoxaline (9b)

$^1\text{H}$  NMR (400 MHz, DMSO)

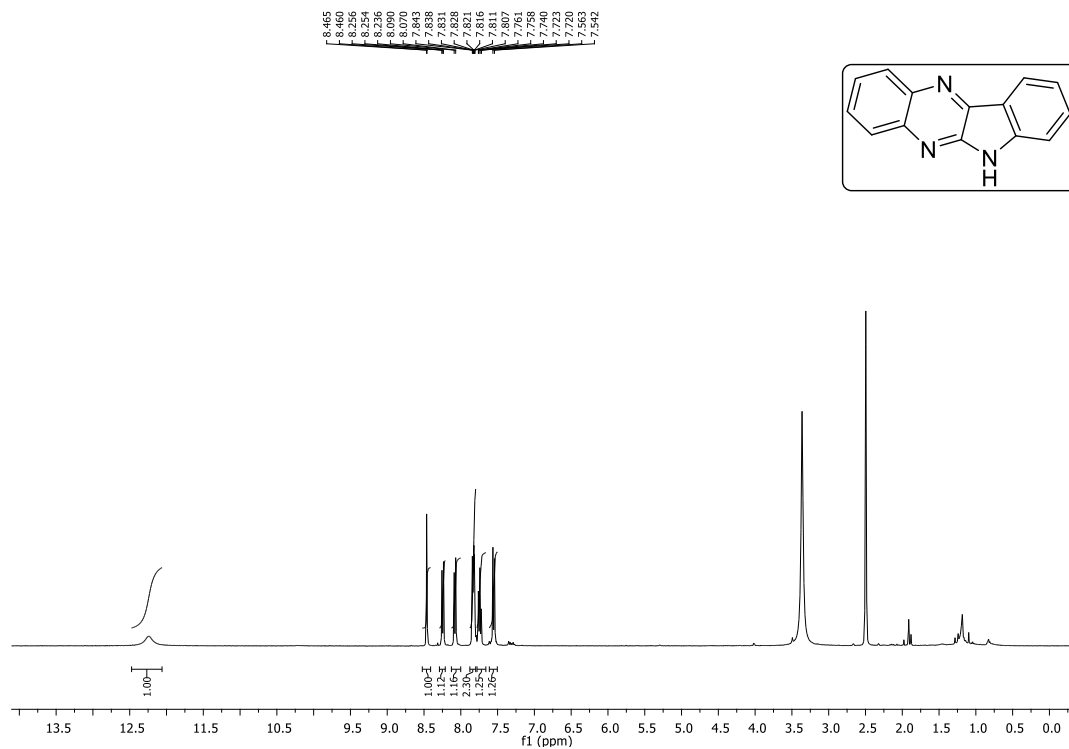

$^{13}\text{C}\{^1\text{H}\}$  NMR (100 MHz, DMSO)

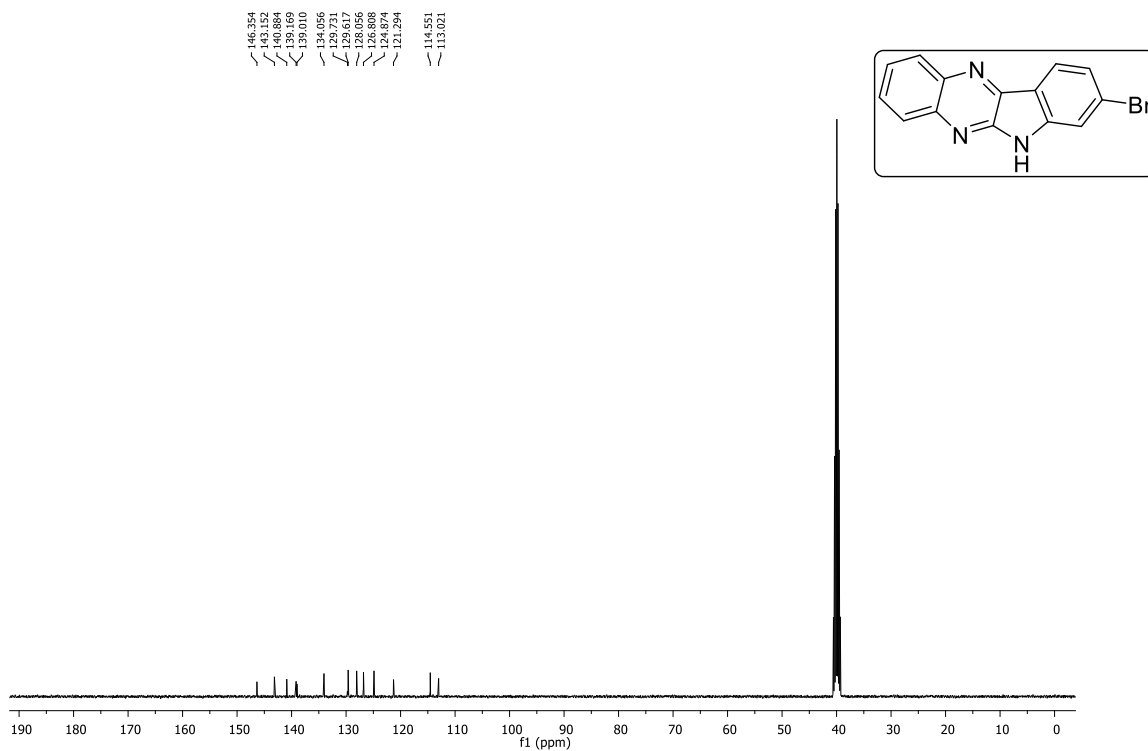

# 9-Methyl-6H-indolo[2,3-b]quinoxaline (9g)

$^1\text{H}$  NMR (700 MHz, DMSO)

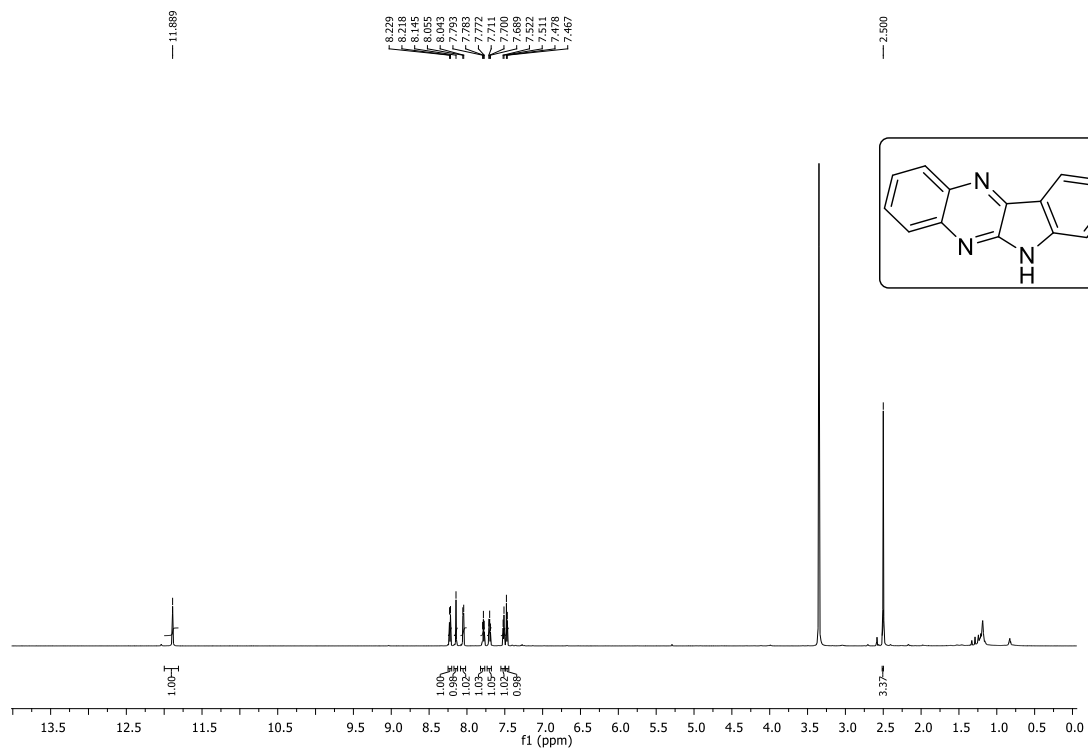

$^{13}\text{C}\{^1\text{H}\}$  NMR (175 MHz, DMSO)

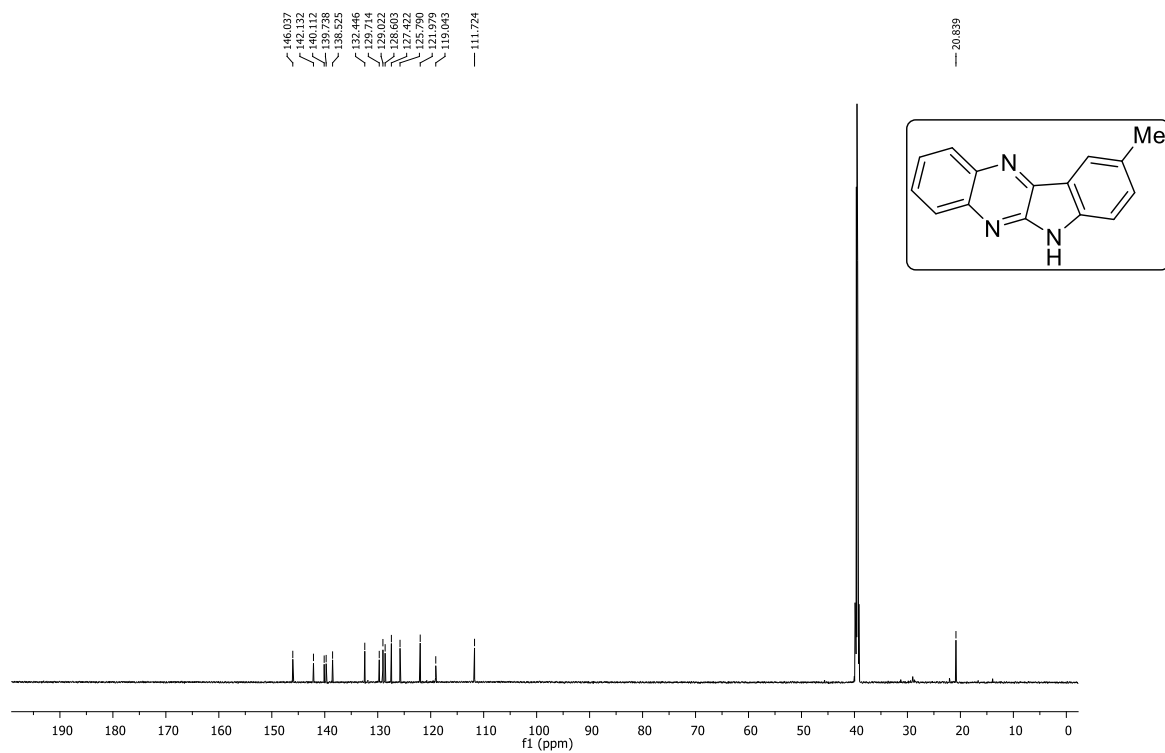

# 8-Methoxy-6H-indolo[2,3-b]quinoxaline (9f)

$^1\text{H}$  NMR (700 MHz, DMSO)

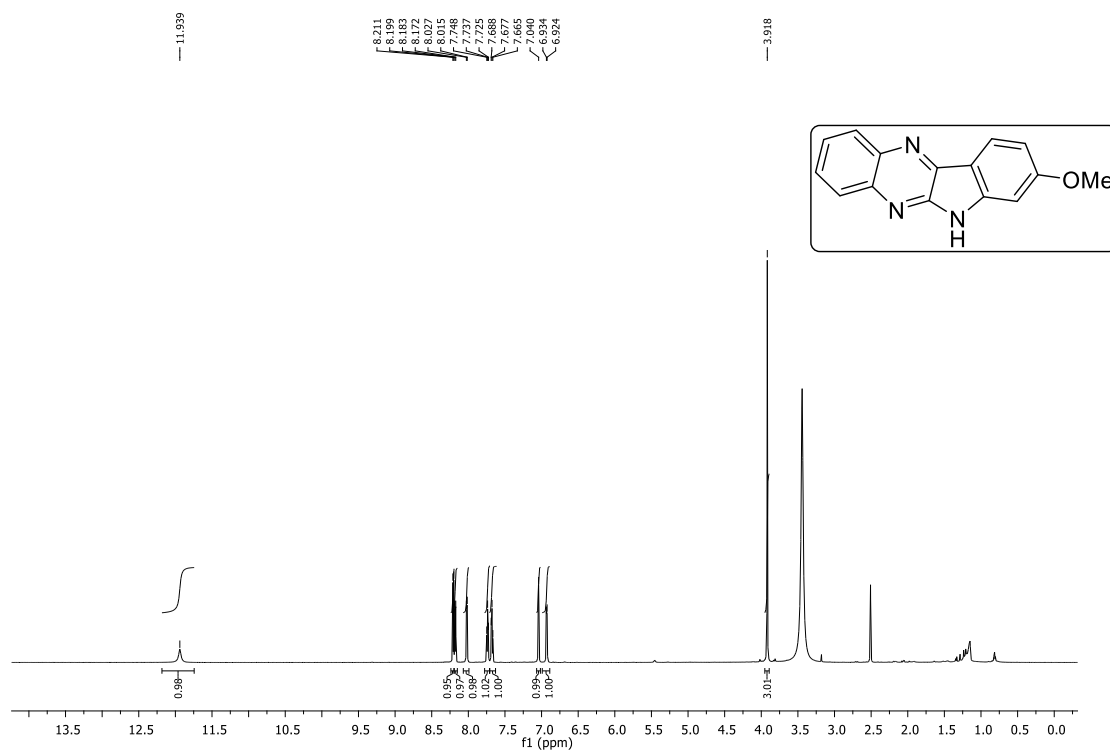

$^{13}\text{C}\{^1\text{H}\}$  NMR (175 MHz, DMSO)

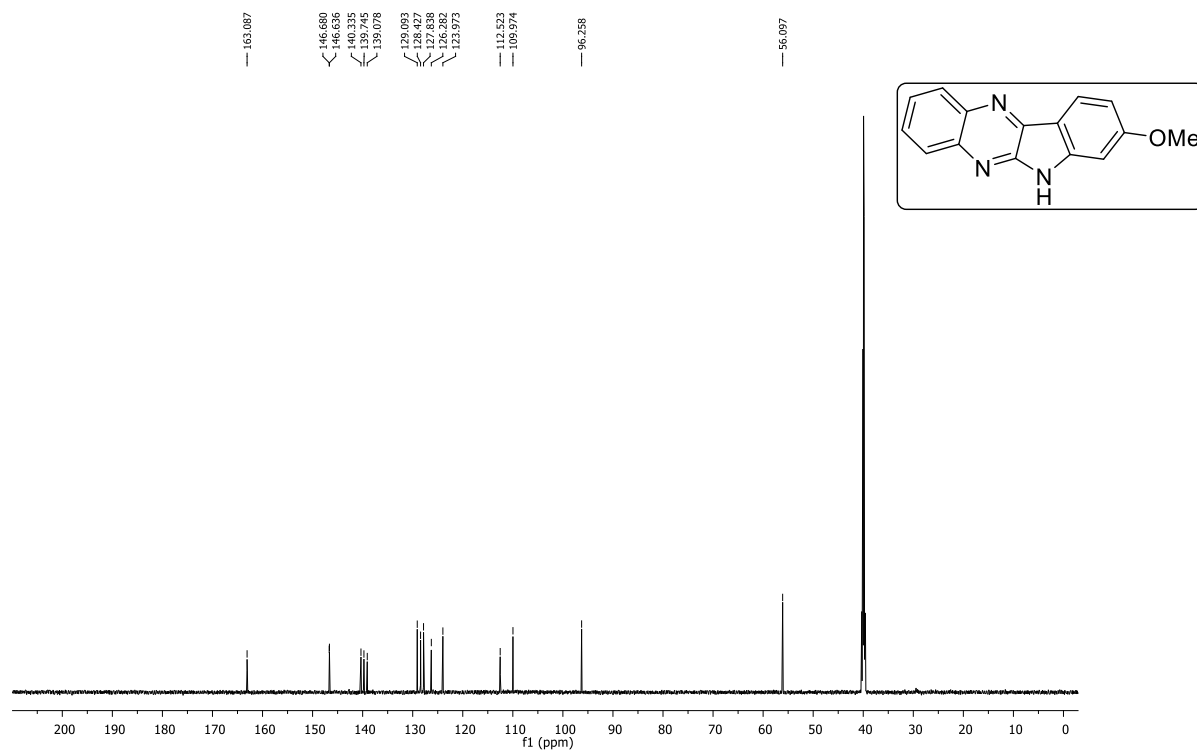

# 6-Phenyl-6H-indolo[2,3-b]quinoxaline (10a)

<sup>1</sup>H NMR (400 MHz, CDCl<sub>3</sub>)

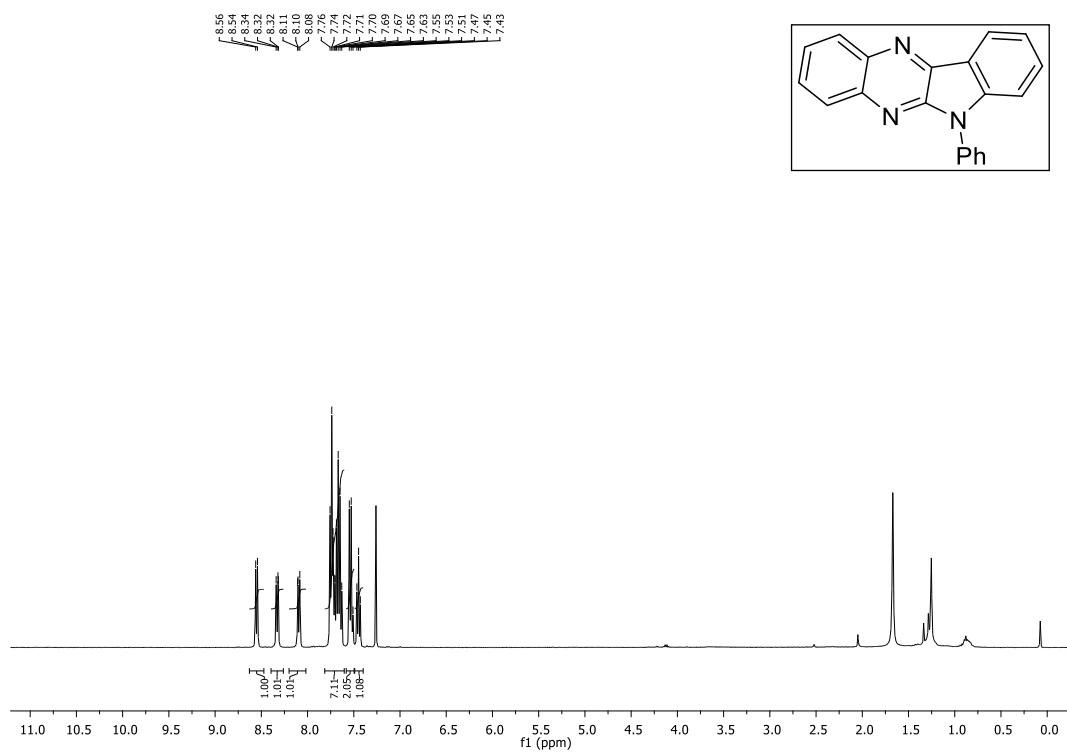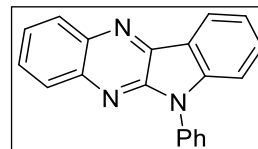

<sup>13</sup>C NMR (100 MHz, CDCl<sub>3</sub>)

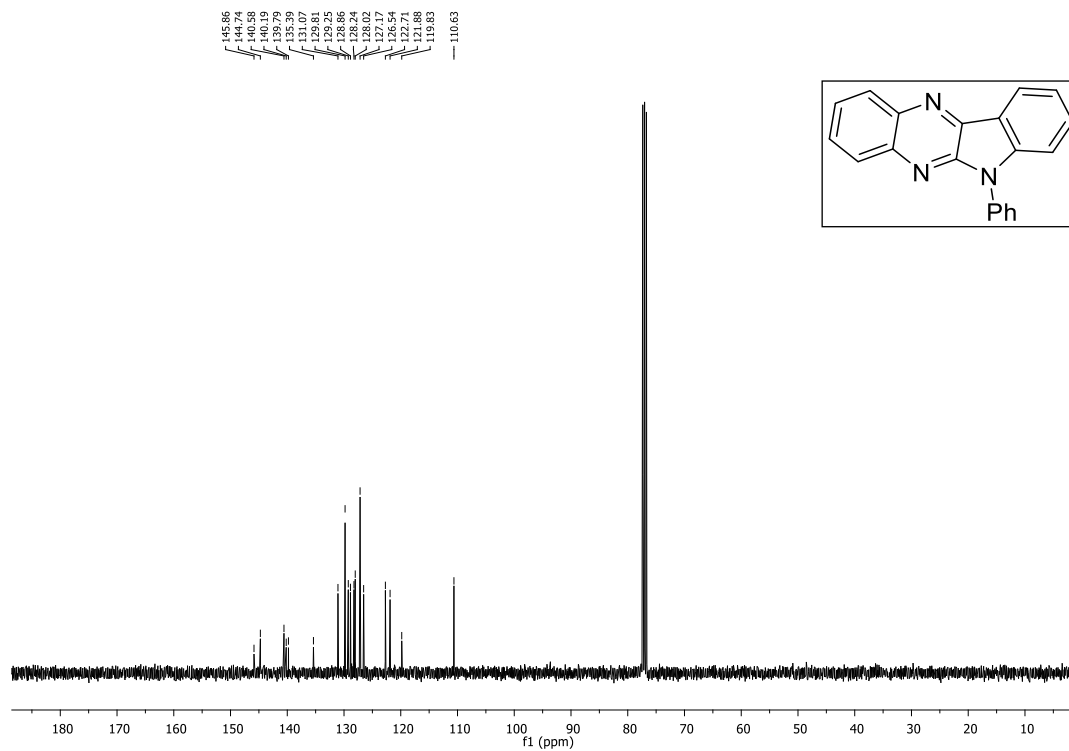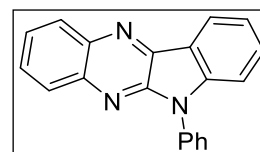

# 6,6'-(9-(*p*-Tolyl)-9*H*-carbazole-3,6-diyl)bis(6*H*-indolo[2,3-*b*]quinoxaline) (12)

$^1\text{H}$  NMR (400 MHz,  $\text{CDCl}_3$ )

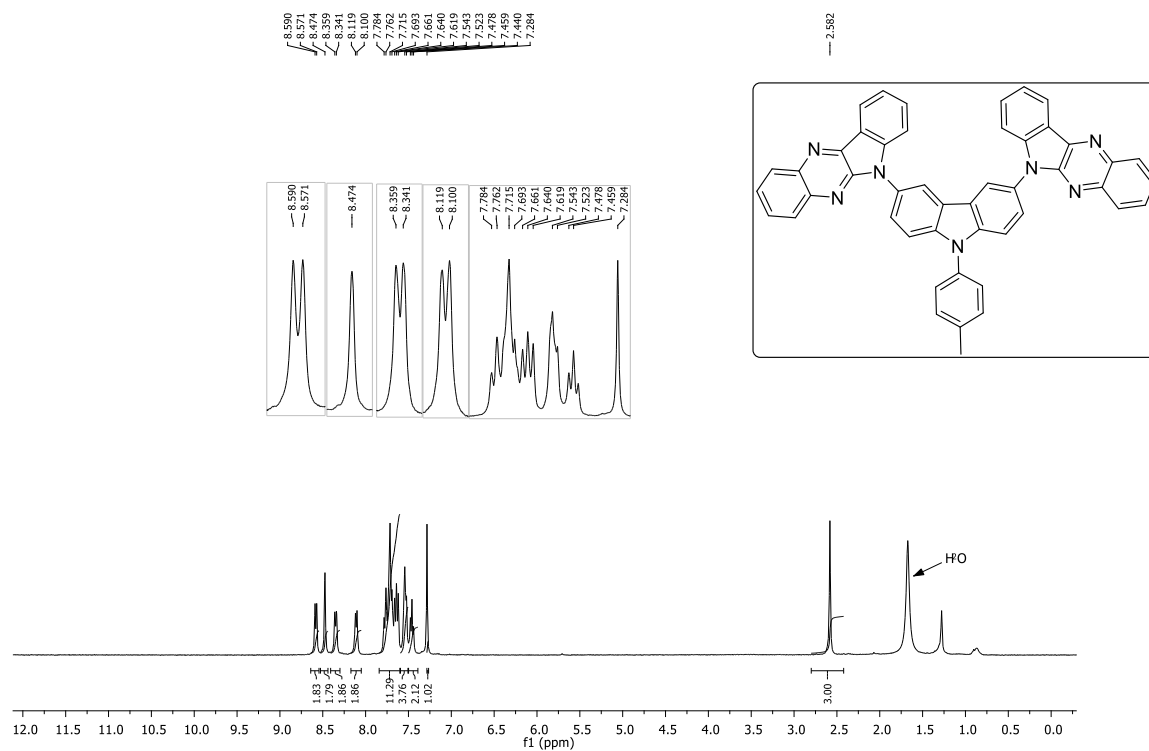

$^{13}\text{C}\{^1\text{H}\}$  NMR (100 MHz,  $\text{CDCl}_3$ )

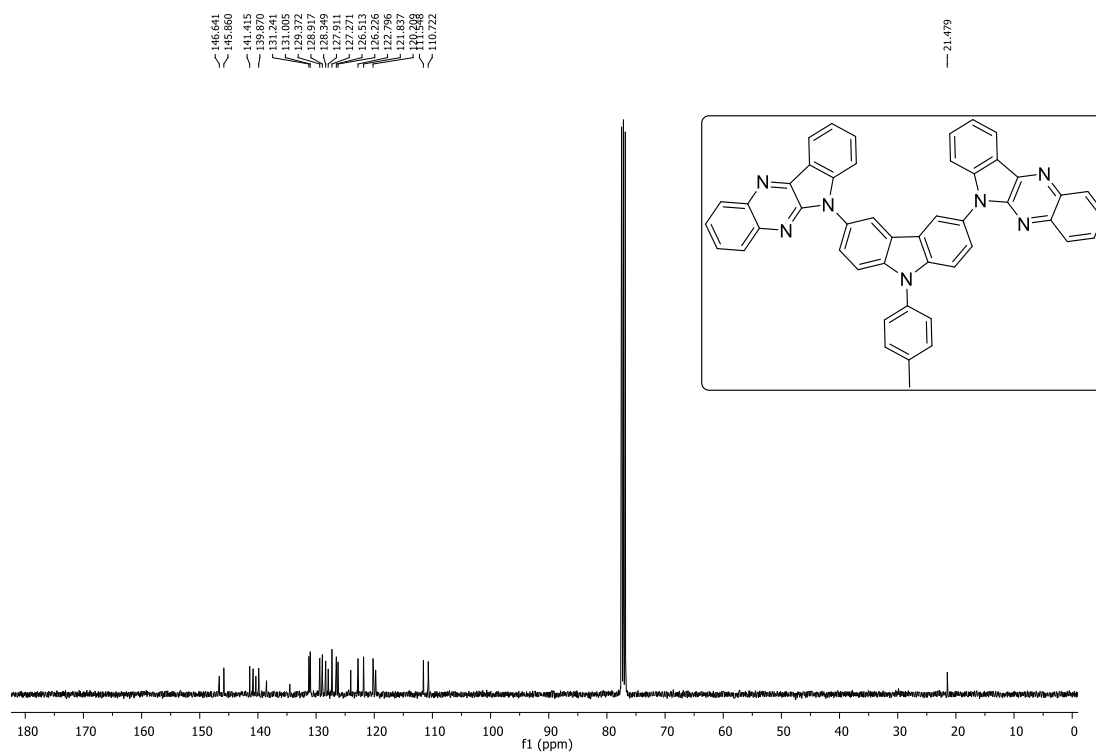

## Mass spectra copies

### 4-Methyl-N-(3-phenylquinoxalin-2-yl)benzenesulfonamide (4a)

PERU\_VS\_893

07-Dec-2022  
12:34:21

XEVO-G2XSQTOF#YFA1739

PERU\_07122022\_2 (0.053) Cu (0.05); Is (1.00,1.00) C<sub>21</sub>H<sub>18</sub>N<sub>3</sub>O<sub>2</sub>S

1: TOF MS ES+  
7.44e12

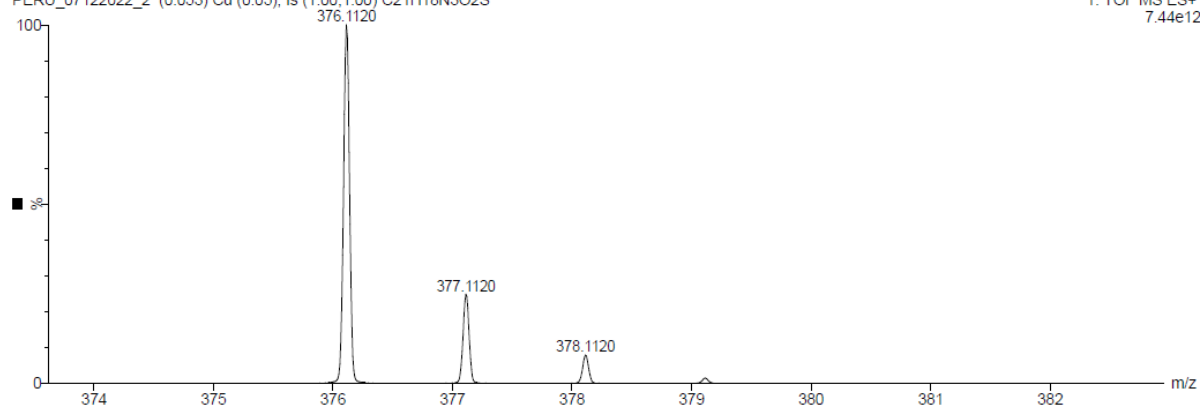

PERU\_07122022\_2 13 (0.276) Cm (13)

1: TOF MS ES+  
2.67e4

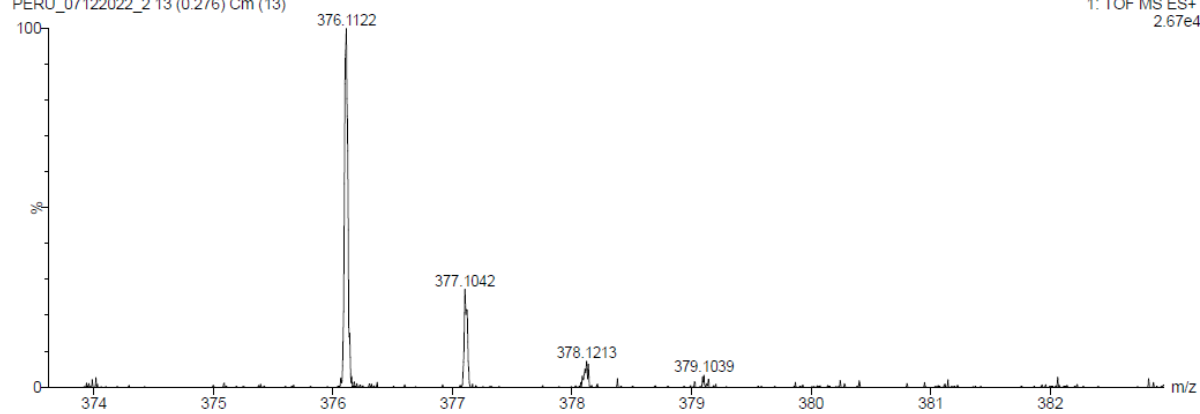



**N-(3-(4-Fluorophenyl)quinoxalin-2-yl)-4-methylbenzenesulfonamide (4b)**

VS-925

*4F-Tosyl*

31-May-2022  
19:33:22

XEVO-G2XSQTOF#YFA1739

SP\_31052022 5 (0.725) Cu (0.05); Is (1.00,1.00) C21H17FN3O2S

1: TOF MS ES+  
7.44e12

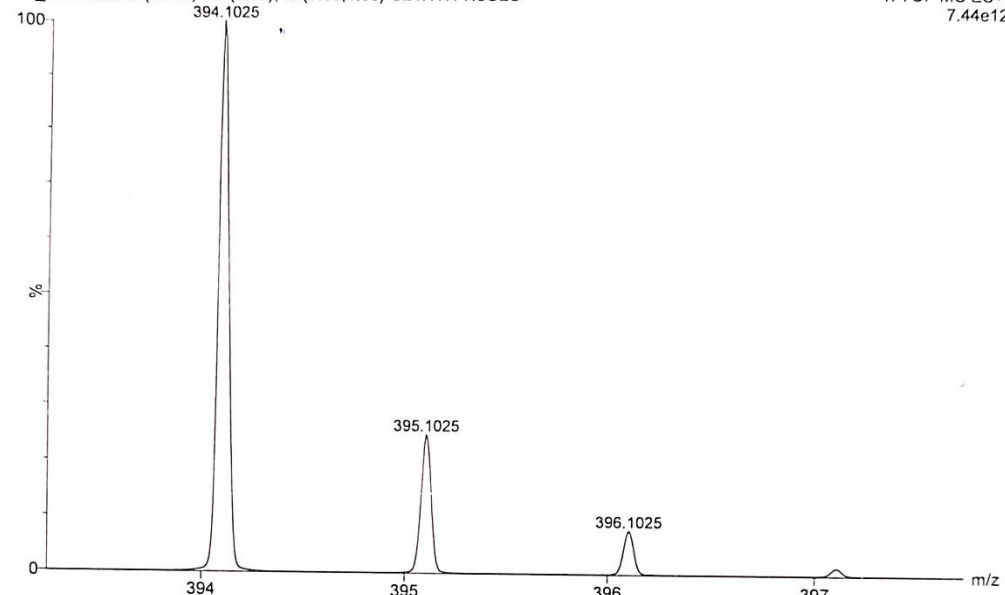

SP\_31052022 5 36 (0.725)

1: TOF MS ES+  
5.46e6

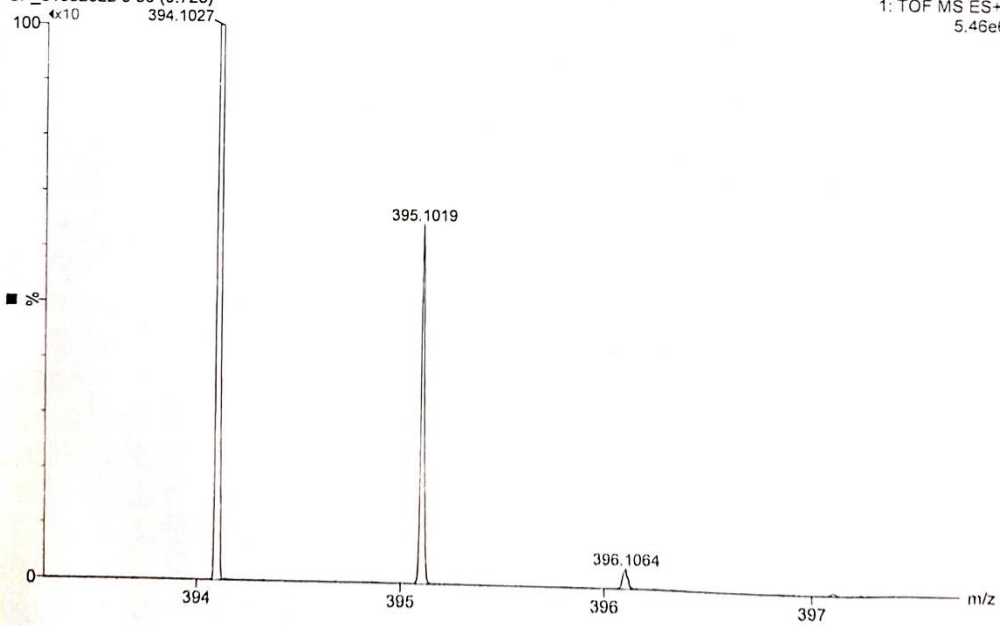

# N-(3-(4-Chlorophenyl)quinoxalin-2-yl)-4-methylbenzenesulfonamide (4c)

4-c-75

## Display Report

**Analysis Info**  
Analysis Name: D:\Data\APR-2022\PERU\01042022\_PERU\_VS\_924\_RE.d  
Method: Pos\_tune\_low.m  
Sample Name: Tmix-131118  
Comment:  
Acquisition Date: 4/1/2022 11:09:44 AM  
Operator: Amit S.Sahu  
Instrument: micrOTOF-Q II 10337

**Acquisition Parameter**

|             |            |                       |           |                  |           |
|-------------|------------|-----------------------|-----------|------------------|-----------|
| Source Type | ESI        | Ion Polarity          | Positive  | Set Nebulizer    | 0.4 Bar   |
| Focus       | Not active | Set Capillary         | 4500 V    | Set Dry Heater   | 180 °C    |
| Scan Begin  | 50 m/z     | Set End Plate Offset  | -500 V    | Set Dry Gas      | 4.0 l/min |
| Scan End    | 3000 m/z   | Set Collision Cell RF | 130.0 Vpp | Set Divert Valve | Waste     |

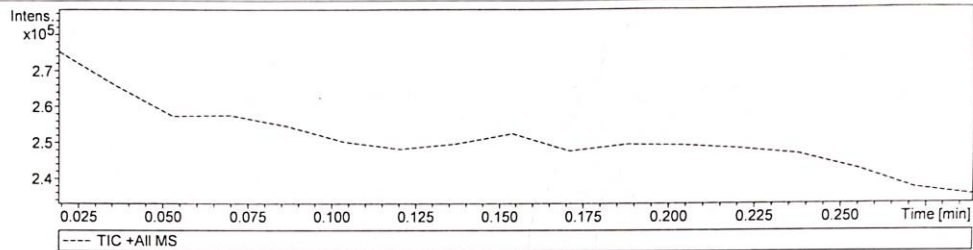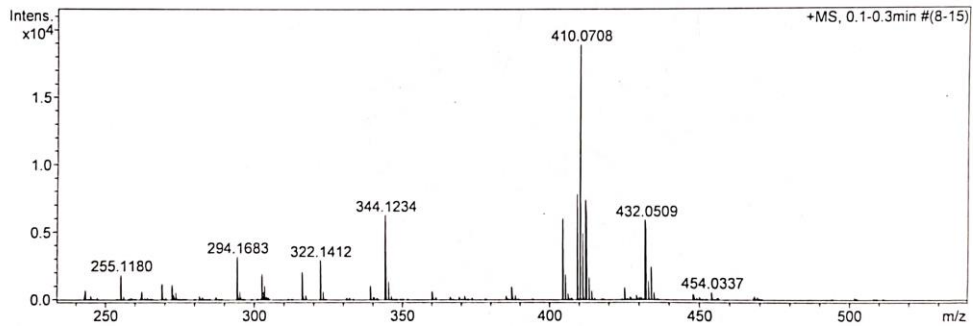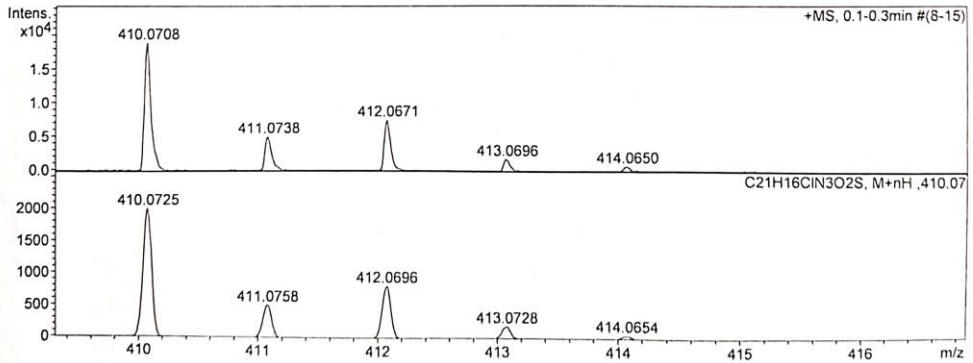

**N-(3-(4-Bromophenyl)quinoxalin-2-yl)-4-methylbenzenesulfonamide (4d)**

*Handwritten initials/signature*

**Display Report**

**Analysis Info**  
 Analysis Name: D:\Data\JUNE-2022\PERU\02062022\_PERU\_VS\_943.d  
 Method: pos tune\_wide\_030118.m  
 Sample Name: Tmix-131118  
 Comment:  
 Acquisition Date: 6/2/2022 10:26:59 AM  
 Operator: Amit S.Sahu  
 Instrument: micrOTOF-Q II 10337

**Acquisition Parameter**

|             |            |                       |           |                  |           |
|-------------|------------|-----------------------|-----------|------------------|-----------|
| Source Type | ESI        | Ion Polarity          | Positive  | Set Nebulizer    | 0.4 Bar   |
| Focus       | Not active | Set Capillary         | 4500 V    | Set Dry Heater   | 180 °C    |
| Scan Begin  | 50 m/z     | Set End Plate Offset  | -500 V    | Set Dry Gas      | 4.0 l/min |
| Scan End    | 3000 m/z   | Set Collision Cell RF | 650.0 Vpp | Set Divert Valve | Waste     |

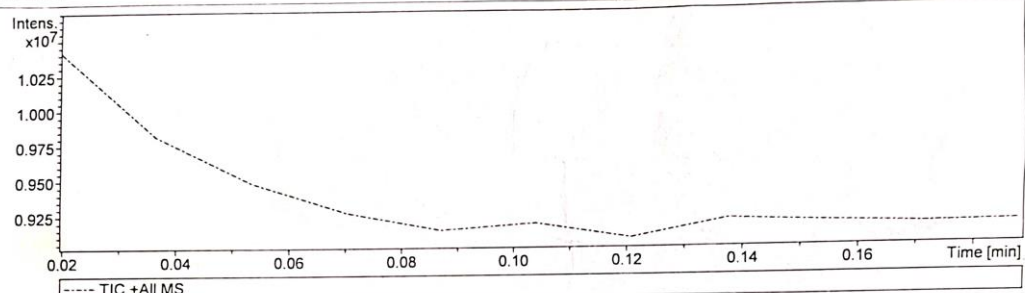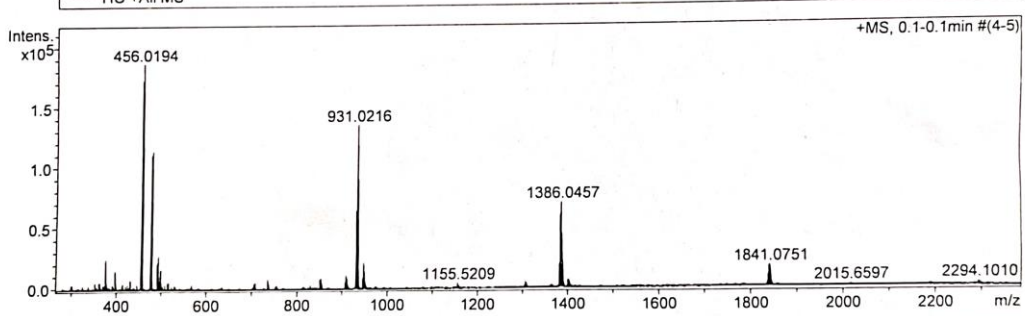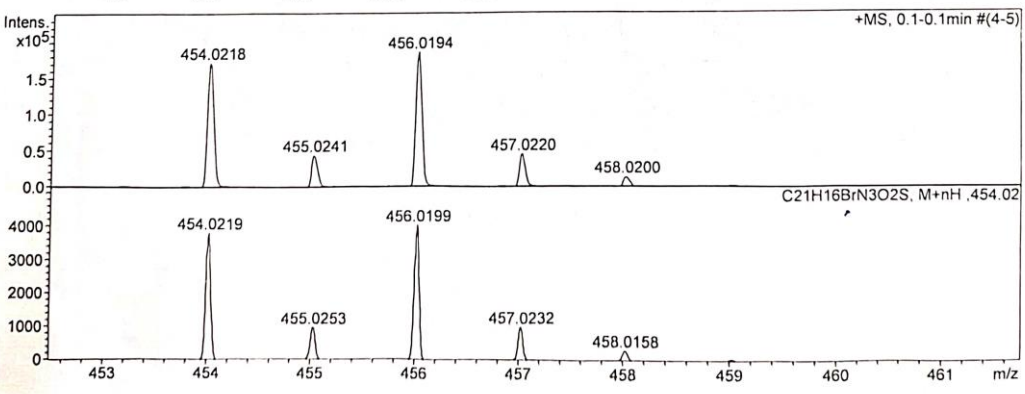

**4-Methyl-N-(3-(*p*-tolyl)quinoxalin-2-yl)benzenesulfonamide (4e)**

PERU\_VS\_939

02-Jan-2024  
11:57:05

XEVO-G2XSQTOF#NotSet

PERU\_02012024\_2 (0.034) Cu (0.05); Is (1.00,1.00) C22H19N3O2SNa

TOF MS ES+  
7.36e12

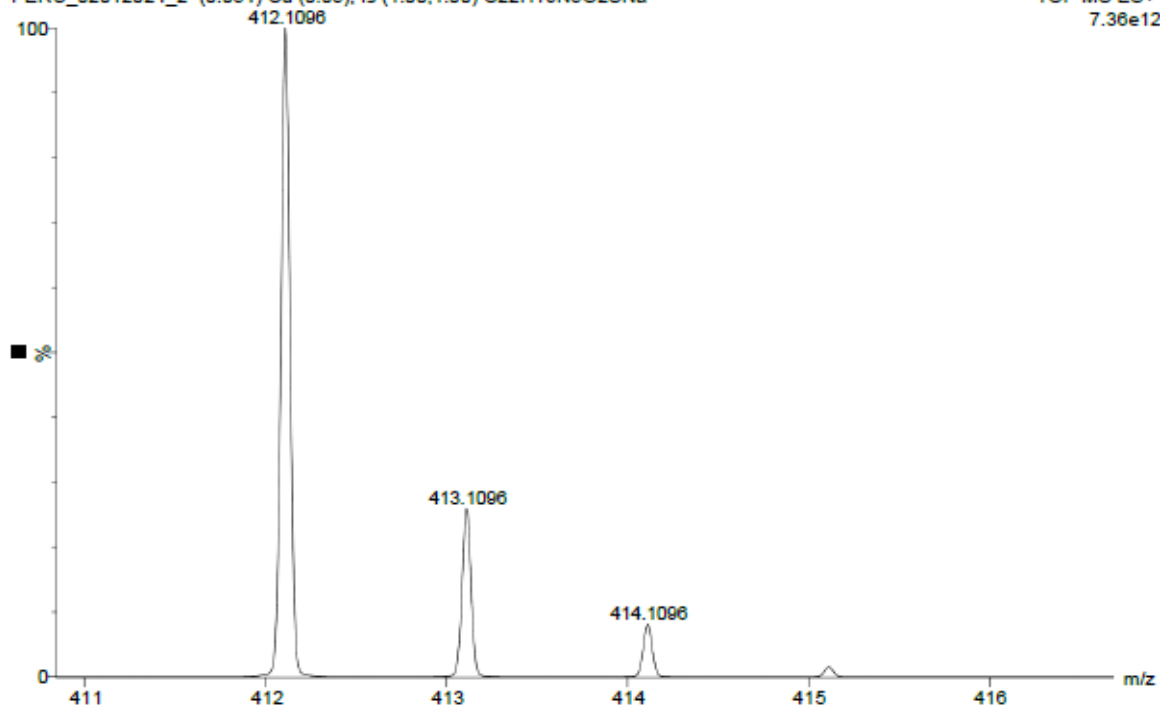

PERU\_02012024\_2 53 (0.913) Cm (53:54)  
412.1093

TOF MS ES+  
1.34e5

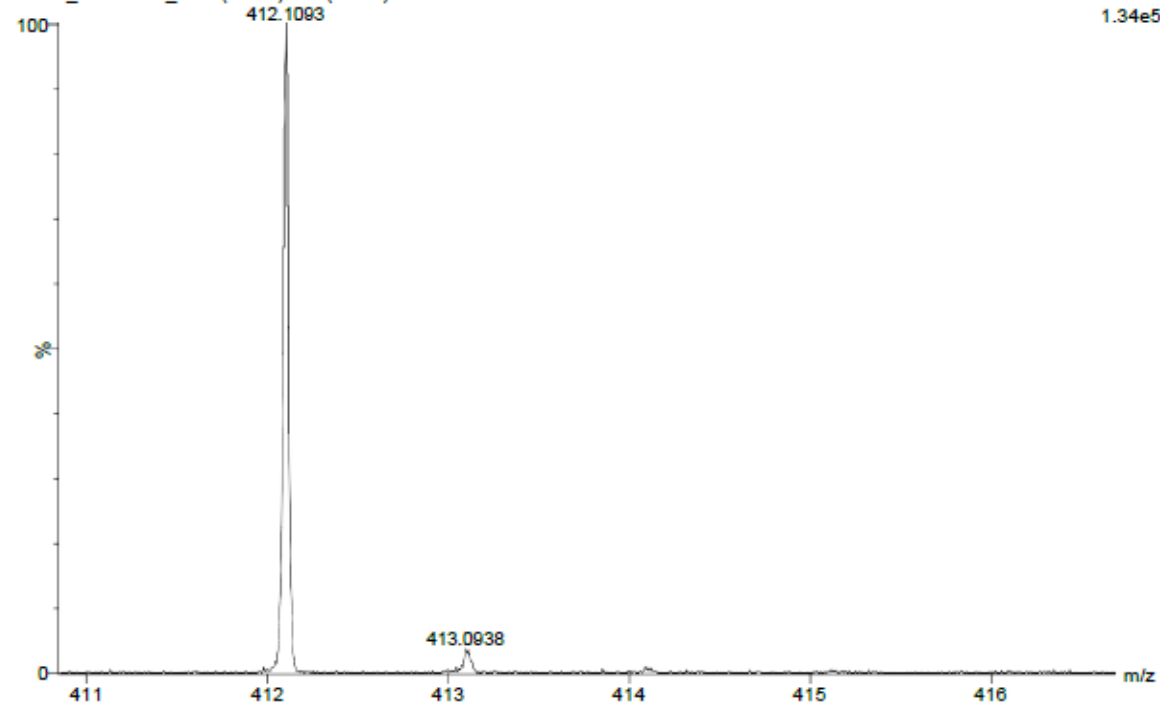

***N*-(3-(4-Methoxyphenyl)quinoxalin-2-yl)-4-methylbenzenesulfonamide (4f)**

PERU\_VS\_923

02-Jan-2024  
12:08:19

XEVO-G2XSQTOF#NotSet

PERU\_02012024\_3 (0.034) Cu (0.05); Is (1.00,1.00) C<sub>22</sub>H<sub>20</sub>N<sub>3</sub>O<sub>3</sub>S

TOF MS ES+  
7.34e12

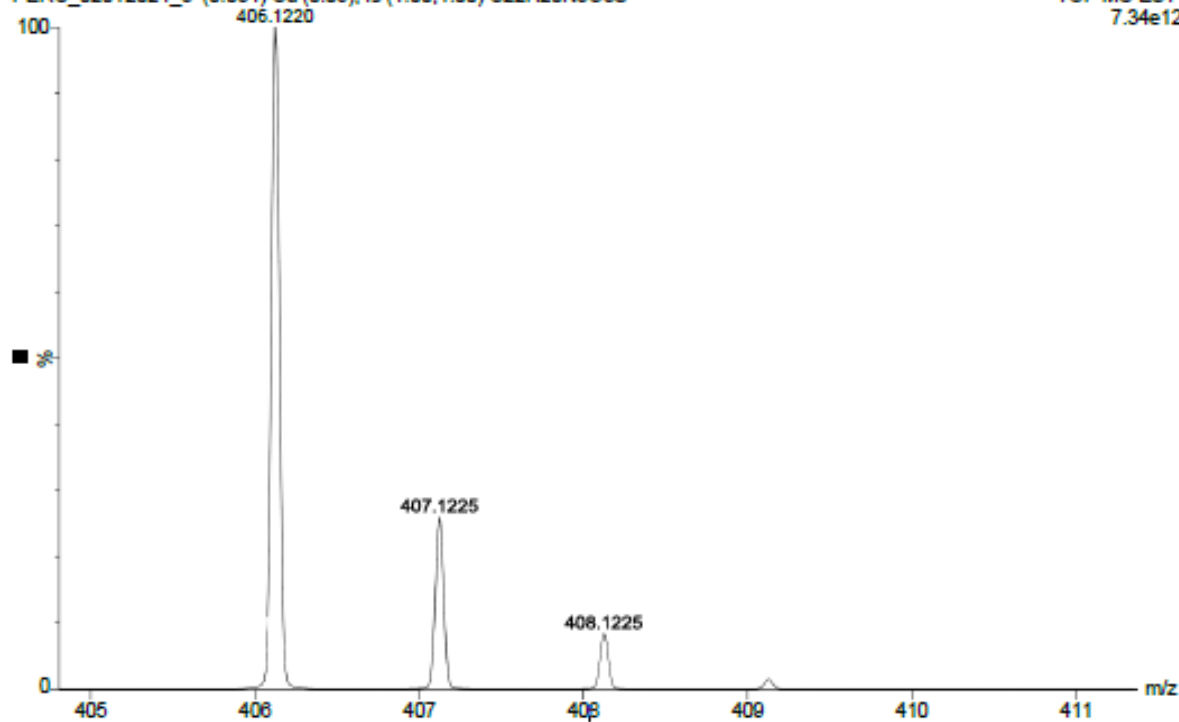

PERU\_02012024\_3 23 (0.406) Cm (16:23)

TOF MS ES+  
1.96e6

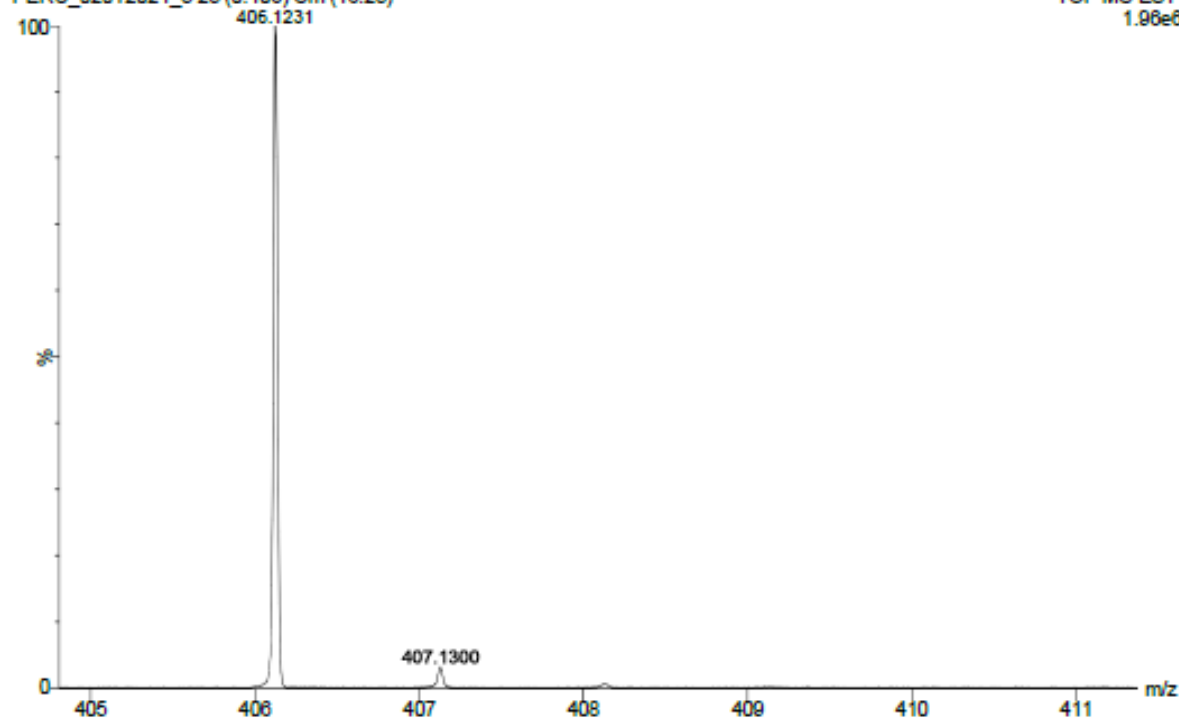

**N-(3-(2-Chlorophenyl)quinoxalin-2-yl)-4-methylbenzenesulfonamide (4g)**

VS-978

28-May-2022  
14:29:51

XEVO-G2XSQTOF#YFA1739

SP\_28052022 (0.054) Cu (0.05); Is (1.00,1.00) C<sub>21</sub>H<sub>17</sub>ClN<sub>3</sub>O<sub>2</sub>S

1: TOF MS ES+  
5.64e12

*2d-Tosyl*

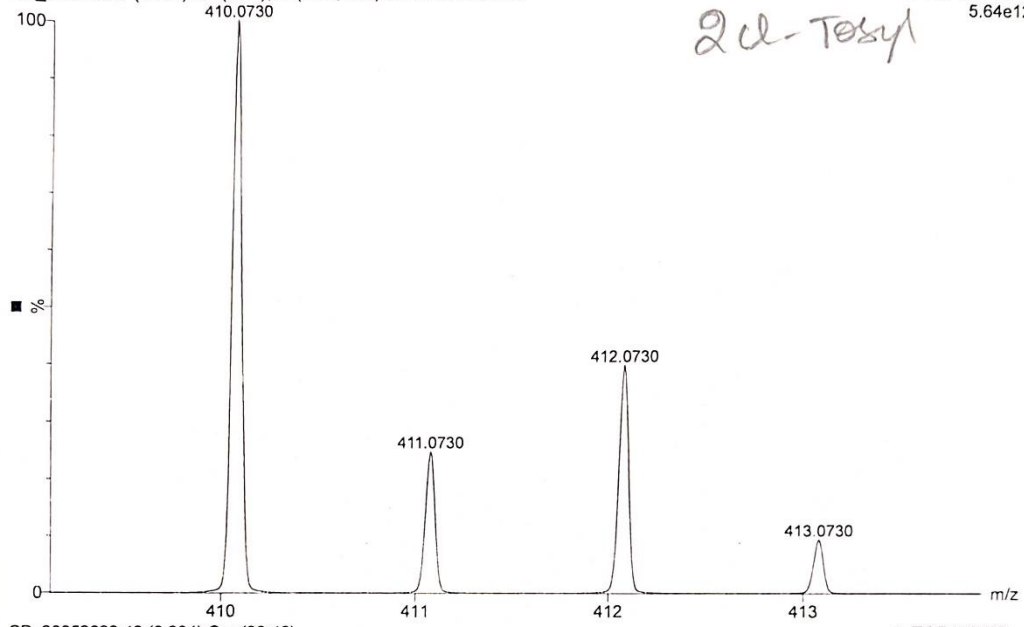

SP\_28052022 49 (0.984) Cm (33:49)

1: TOF MS ES+  
1.84e7

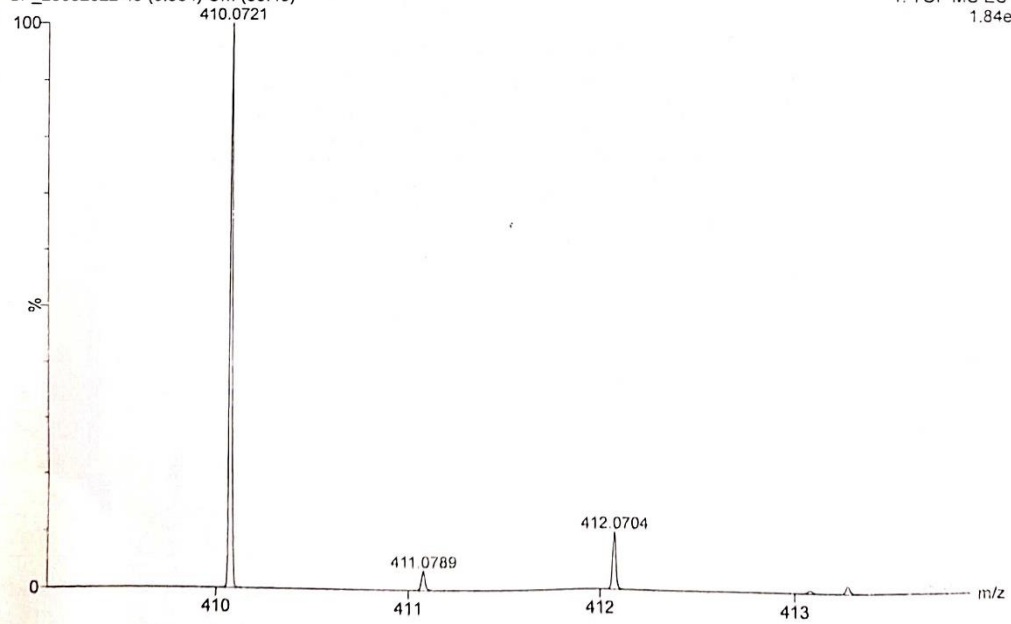

# 4-Methyl-N-(3-(*o*-tolyl)quinoxalin-2-yl)benzenesulfonamide (4h)

*2me Tolyl*

VS-940

31-May-2022  
19:20:53

XEVO-G2XSQTOF#YFA1739

SP\_31052022 3 (0.381) Cu (0.05); Is (1.00,1.00) C22H20N3O2S

1: TOF MS ES+  
7.36e12

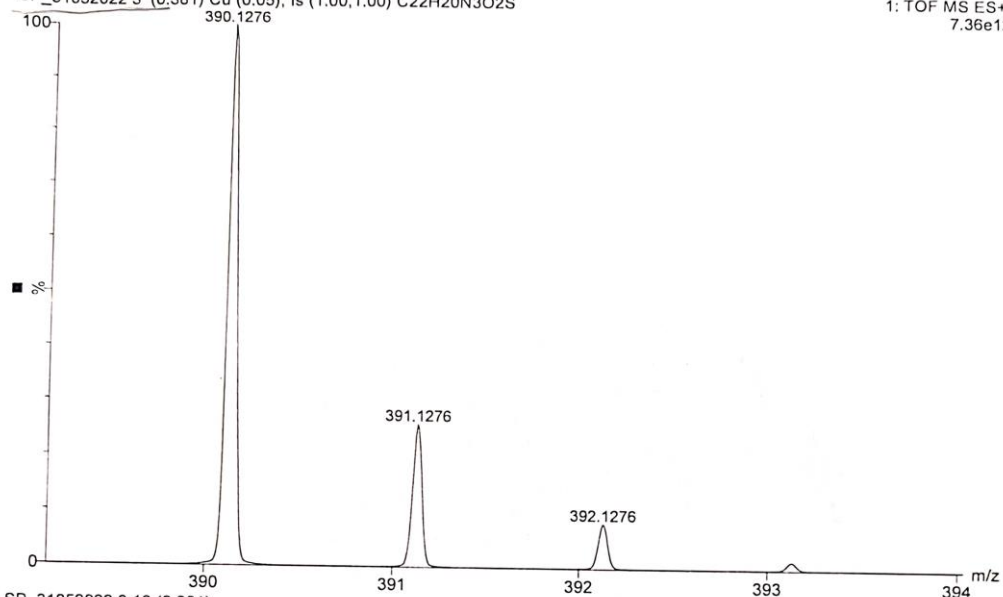

SP\_31052022 3 18 (0.381)

1: TOF MS ES+  
1.30e7

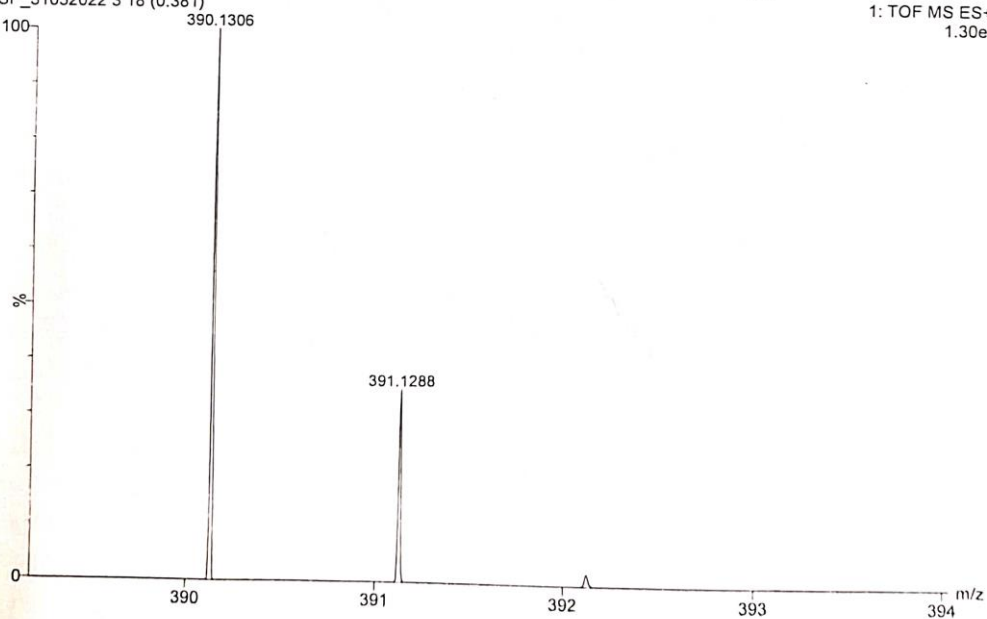

# N-(3-(2-Methoxyphenyl)quinoxalin-2-yl)-4-methylbenzenesulfonamide (4i)

✓  
Buy  
20me

## Display Report

### Analysis Info

Analysis Name D:\Data\MAY-2022\PERU\25052022\_PERU\_VS\_951\_re.d  
Method Pos\_tune\_low\_24052022.N.m  
Sample Name Tmix-131118  
Comment

Acquisition Date 5/25/2022 3:14:12 PM

Operator Amit S.Sahu  
Instrument micrOTOF-Q II 10337

### Acquisition Parameter

|             |            |                       |           |                  |           |
|-------------|------------|-----------------------|-----------|------------------|-----------|
| Source Type | ESI        | Ion Polarity          | Positive  | Set Nebulizer    | 0.5 Bar   |
| Focus       | Not active | Set Capillary         | 4500 V    | Set Dry Heater   | 180 °C    |
| Scan Begin  | 50 m/z     | Set End Plate Offset  | -500 V    | Set Dry Gas      | 5.0 l/min |
| Scan End    | 3000 m/z   | Set Collision Cell RF | 130.0 Vpp | Set Divert Valve | Waste     |

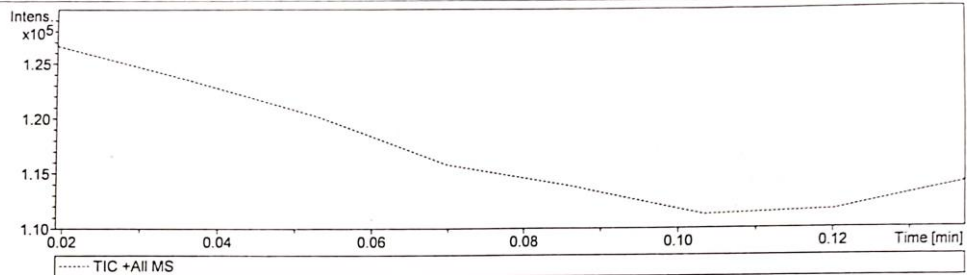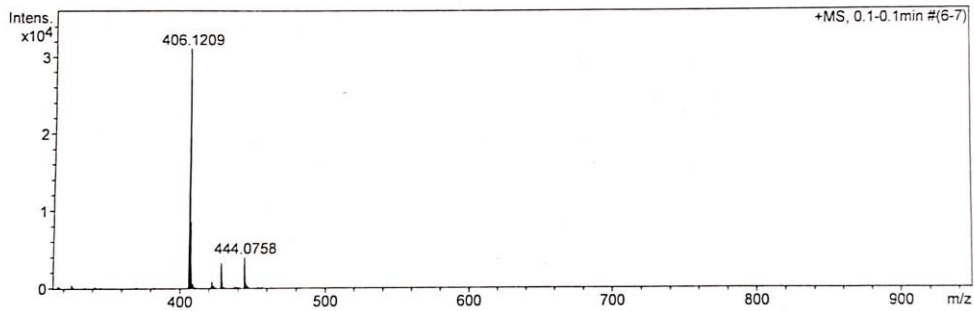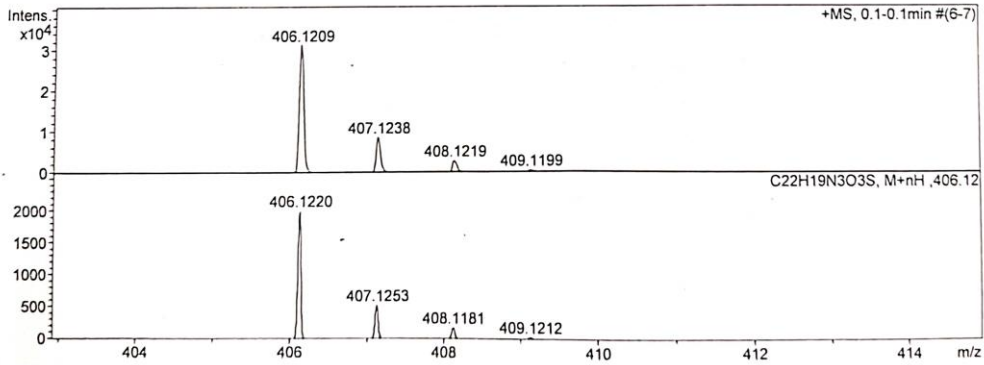



# N-(3-(3-Fluorophenyl)quinoxalin-2-yl)-4-methylbenzenesulfonamide (4j)

## Display Report

Analysis Info  
Analysis Name D:\Data\MAY-2022\PERU\11052022\_PERU\_BS\_19.d  
Method Pos\_tune\_low\_21042022.m  
Sample Name Tmix-131118  
Comment  
Acquisition Date 5/11/2022 3:09:57 PM  
Operator Amit S.Sahu  
Instrument micrOTOF-Q II 10337

Acquisition Parameter  
Source Type ESI Ion Polarity Positive Set Nebulizer 0.5 Bar  
Focus Not active Set Capillary 4500 V Set Dry Heater 180 °C  
Scan Begin 50 m/z Set End Plate Offset -500 V Set Dry Gas 4.0 l/min  
Scan End 3000 m/z Set Collision Cell RF 130.0 Vpp Set Divert Valve Waste

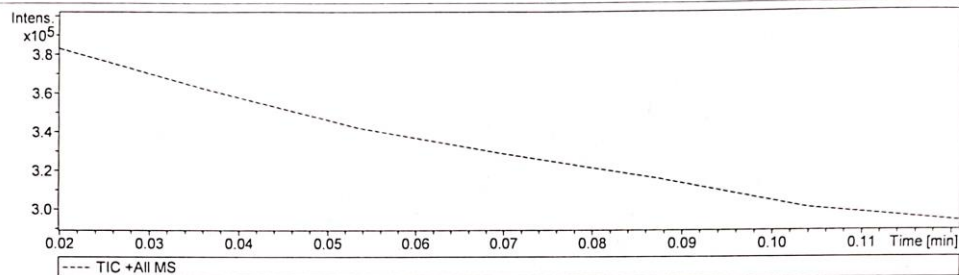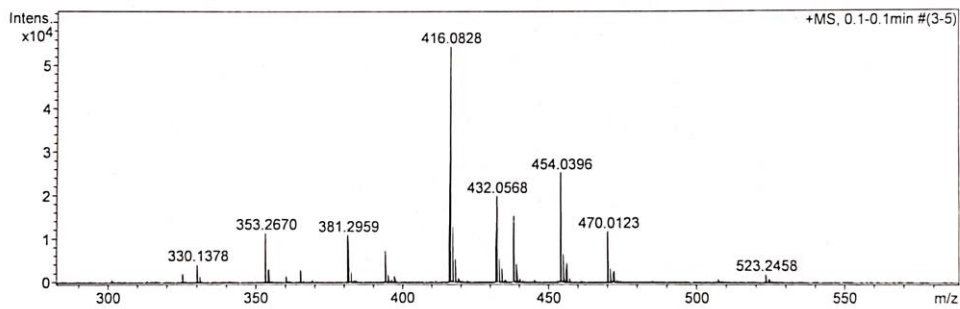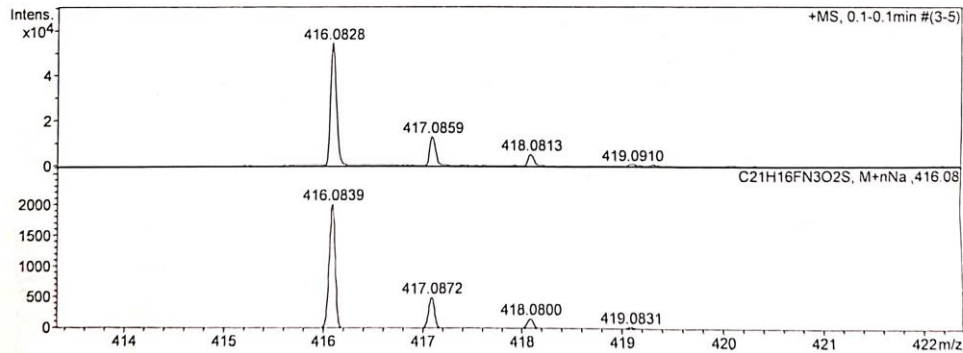

# N-(3-(3-Methoxyphenyl)quinoxalin-2-yl)-4-methylbenzenesulfonamide (4k)

Tolu  
3-OMe

## Display Report

**Analysis Info**  
Analysis Name: D:\Data\MAY-2022\PERU\11052022\_PERU\_BS\_17.d  
Method: Pos\_tune\_low\_21042022.m  
Sample Name: Tmix-131118  
Comment:  
Acquisition Date: 5/11/2022 2:43:07 PM  
Operator: Amit S.Sahu  
Instrument: micrOTOF-Q II 10337

**Acquisition Parameter**

|             |            |                       |           |                  |           |
|-------------|------------|-----------------------|-----------|------------------|-----------|
| Source Type | ESI        | Ion Polarity          | Positive  | Set Nebulizer    | 0.5 Bar   |
| Focus       | Not active | Set Capillary         | 4500 V    | Set Dry Heater   | 180 °C    |
| Scan Begin  | 50 m/z     | Set End Plate Offset  | -500 V    | Set Dry Gas      | 4.0 l/min |
| Scan End    | 3000 m/z   | Set Collision Cell RF | 130.0 Vpp | Set Divert Valve | Waste     |

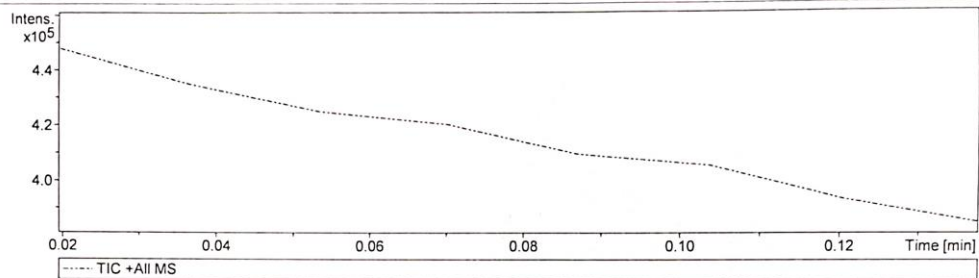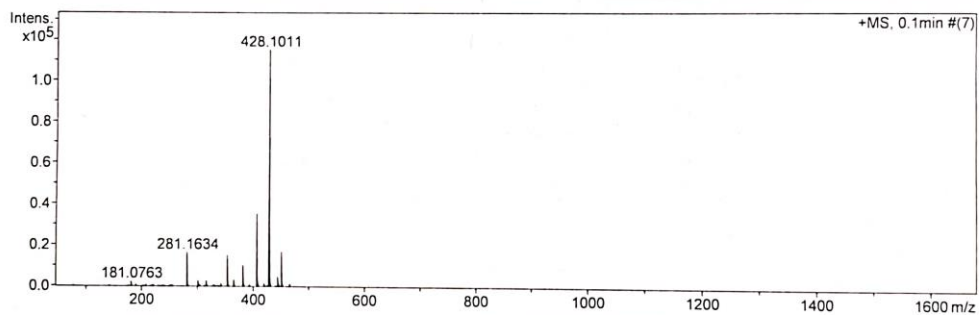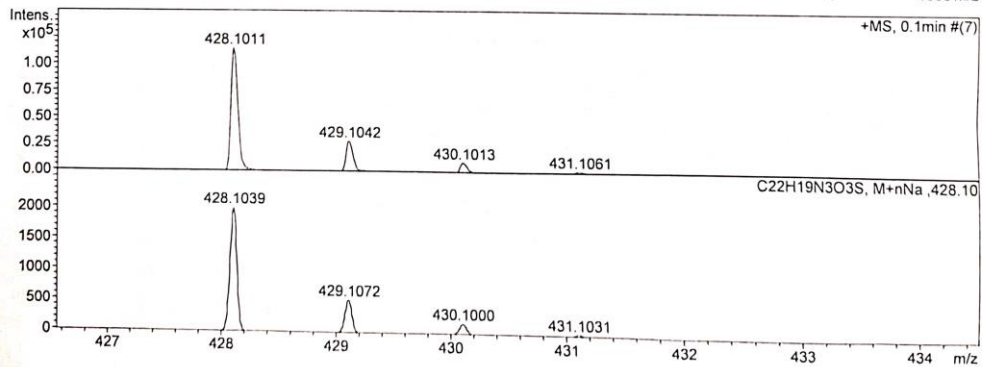

4-Methyl-N-(3-(*m*-tolyl)quinoxalin-2-yl)benzenesulfonamide (4l)

VS-964

*3me*  
*TOsyl*

31-May-2022  
19:26:26

SP\_31052022 4 (0.104) Cu (0.05); Is (1.00,1.00) C22H20N3O2S  
XEVO-G2XSQTOF#YFA1739

1: TOF MS ES+  
7.36e12

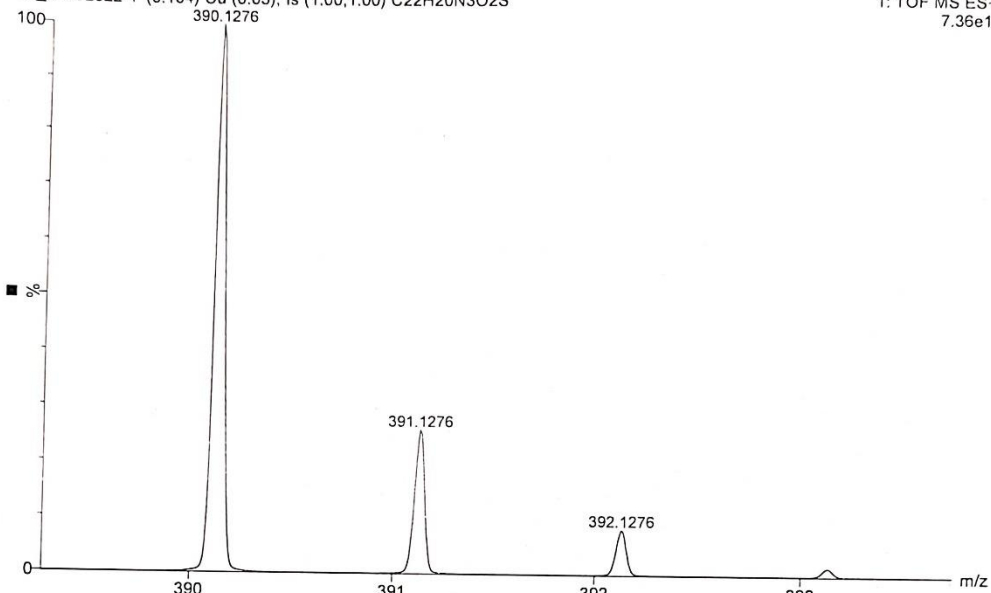

SP\_31052022 4 4 (0.104)

1: TOF MS ES+  
1.08e7

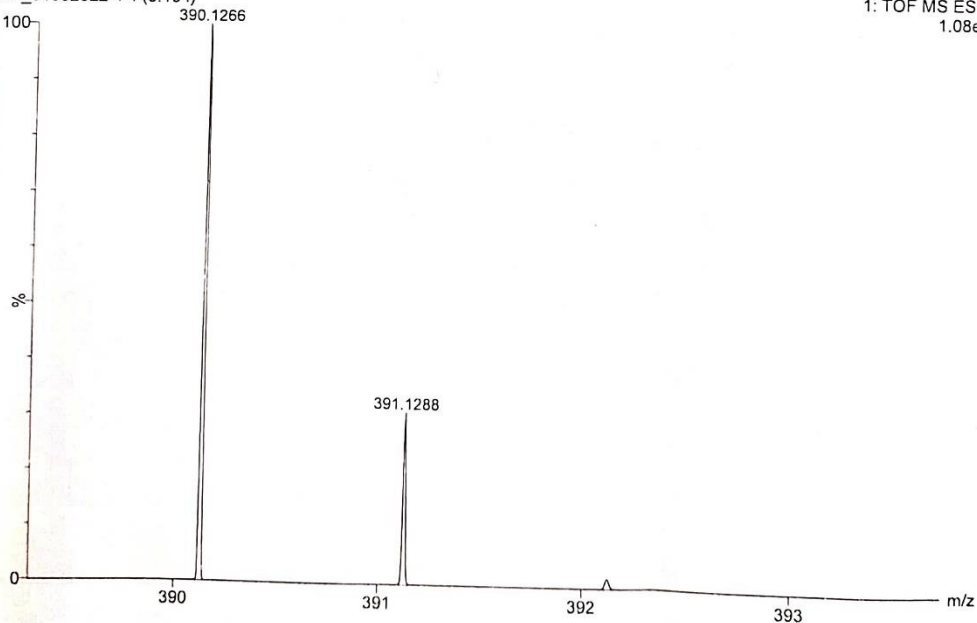

***N*-(3-(3,5-Dimethylphenyl)quinoxalin-2-yl)-4-methylbenzenesulfonamide (4m)**

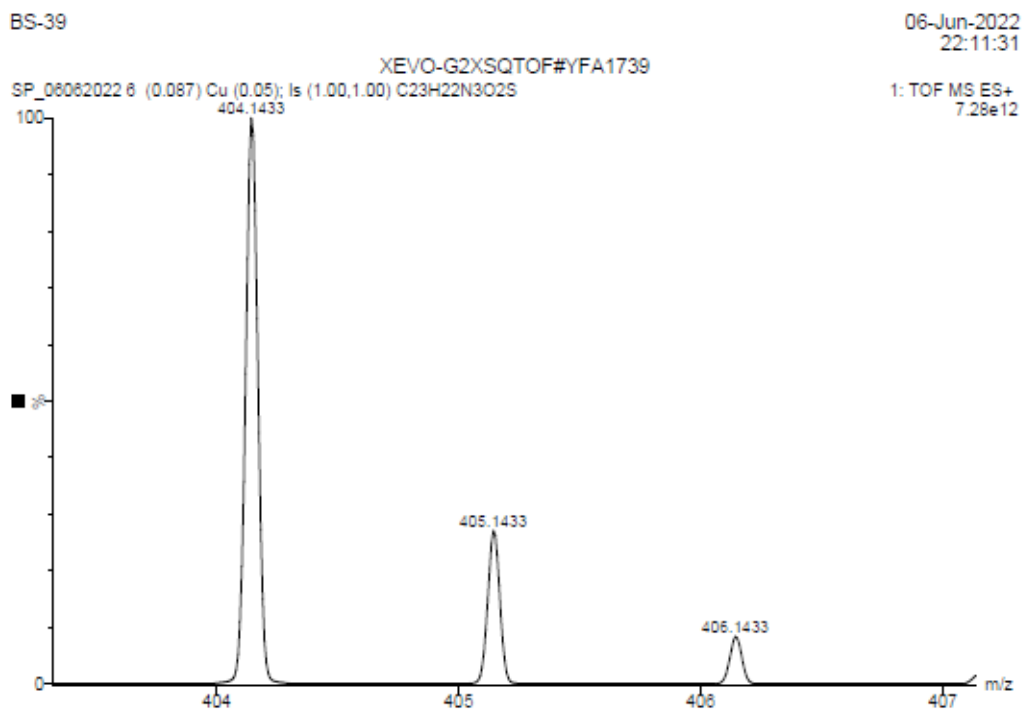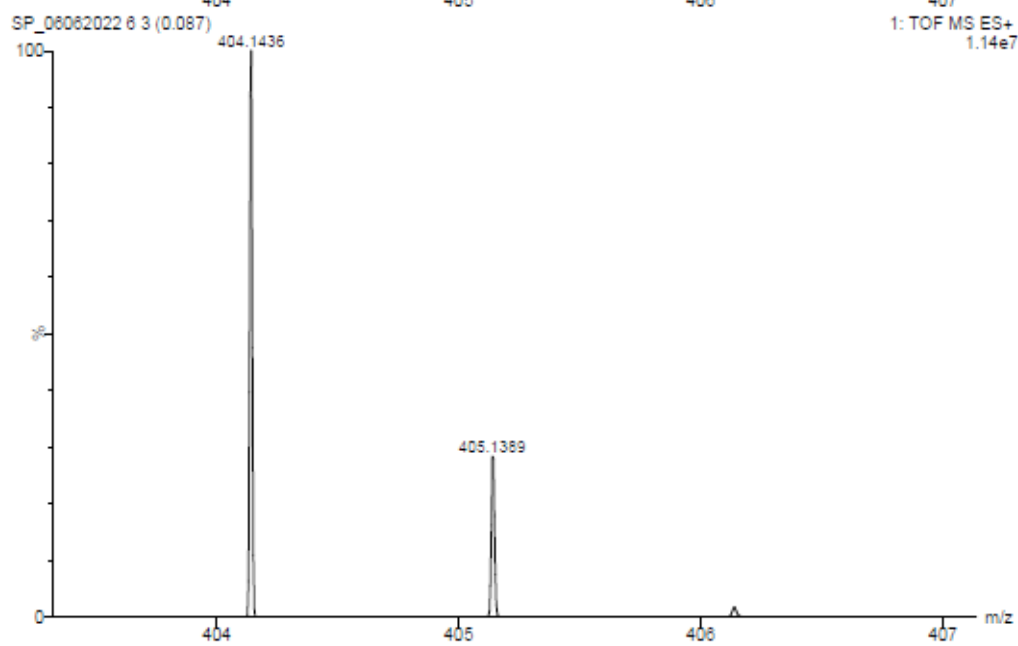

***N*-(3-(2,3-Dimethoxyphenyl)quinoxalin-2-yl)-4-methylbenzenesulfonamide (4n)**

BS-27

30-Jun-2022  
19:12:42

XEVO-G2XSQTOF#YFA1739

SP-30082022-2 (0.226) Cu (0.05); Is (1.00,1.00) C29H22N3O4S

1: TOF MS ES+  
7.25e12

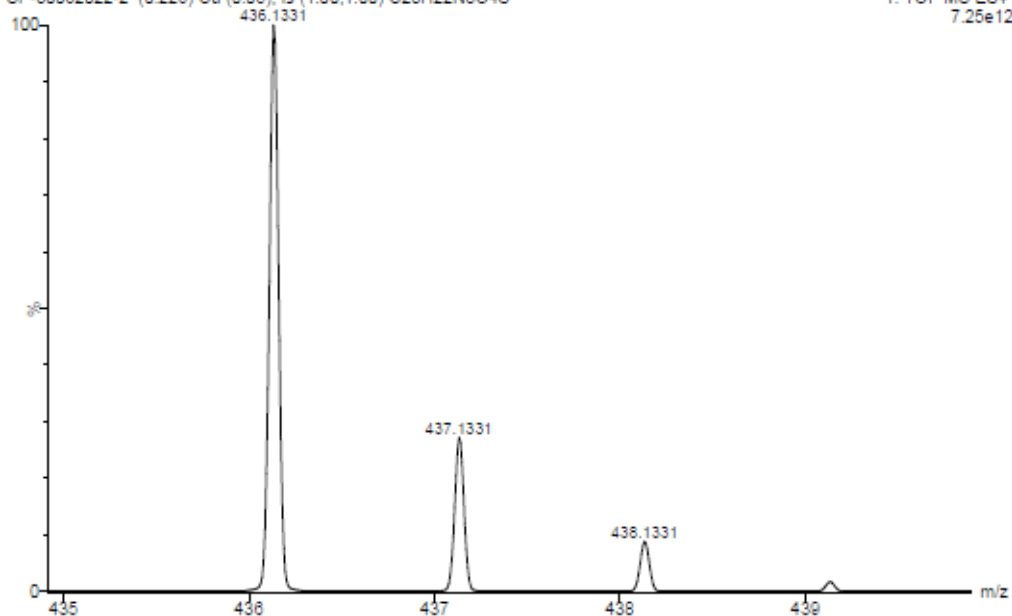

SP-30082022-2 10 (0.226)

1: TOF MS ES+  
3.25e6

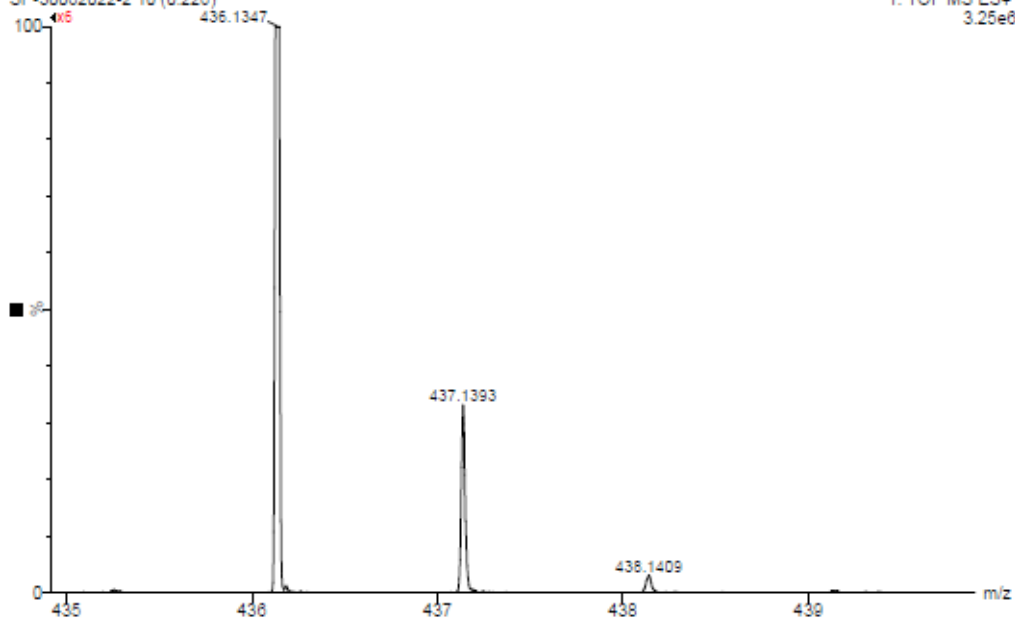

# 4-Methyl-N-(3-(naphthalen-2-yl)quinoxalin-2-yl)benzenesulfonamide (4o)

PERU\_VS\_1181

28-Nov-2022  
10:42:18

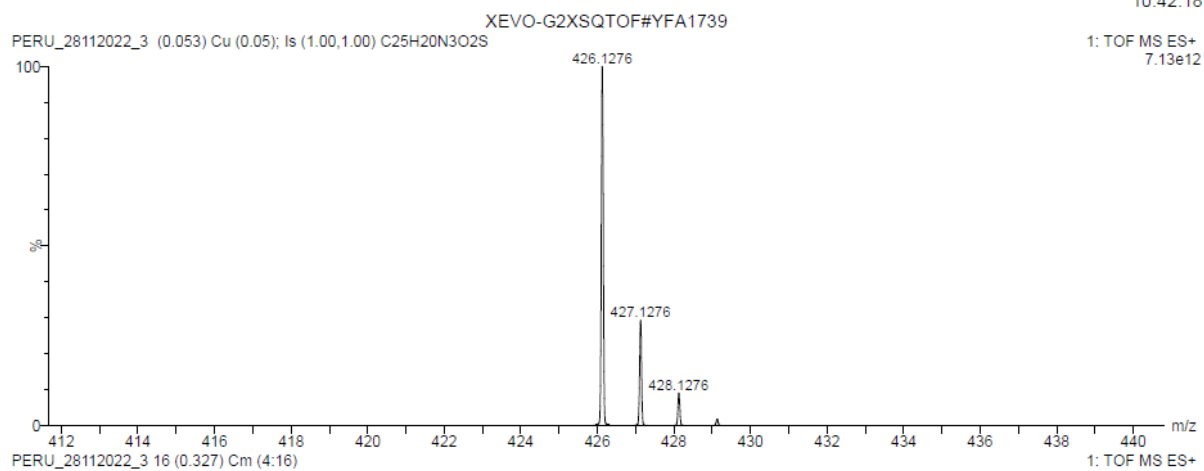

# 4-Methyl-N-(3-(naphthalen-1-yl)quinoxaliN-2-yl)benzenesulfonamide (4p)

VS-967

28-May-2022  
15:02:16

XEVO-G2XSQTOF#YFA1739

SP\_28052022-4 (0.053) Cu (0.05): Is (1.00,1.00) C<sub>25</sub>H<sub>20</sub>N<sub>3</sub>O<sub>2</sub>S

1: TOF MS ES+  
7.13e12

*2 Nap -Tosyl*

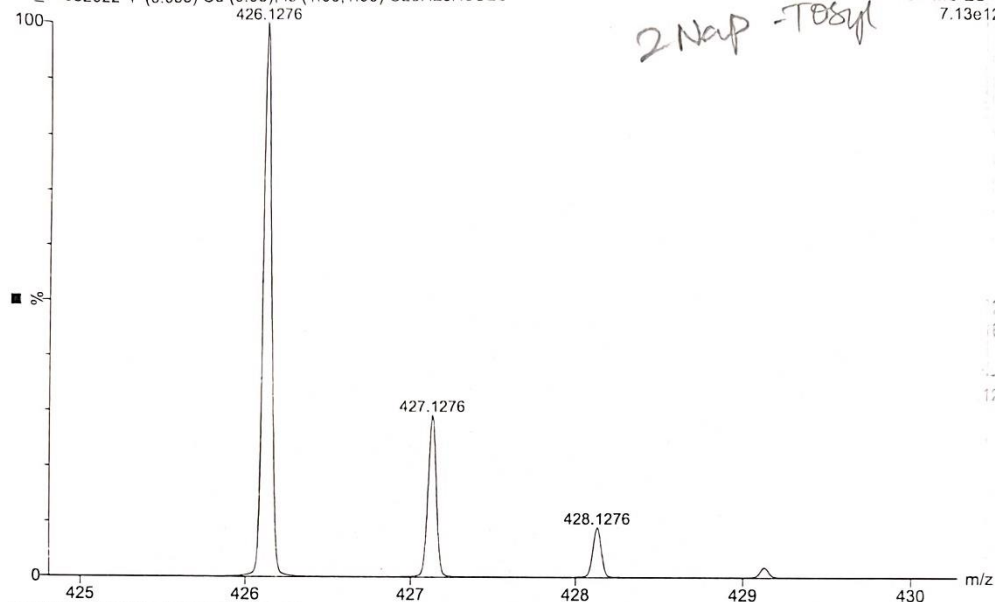

SP\_28052022-4 40 (0.792) Cm (38:42)  
426.1266

1: TOF MS ES+  
2.64e5

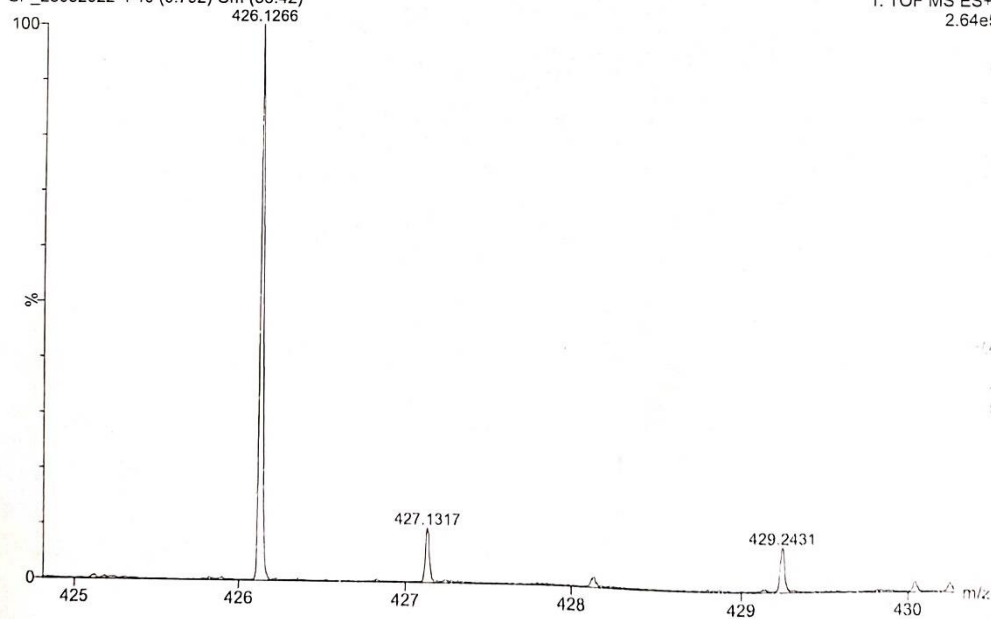

**N-(6,7-Dichloro-3-phenylquinoxalin-2-yl)-4-methylbenzenesulfonamide (4q)**

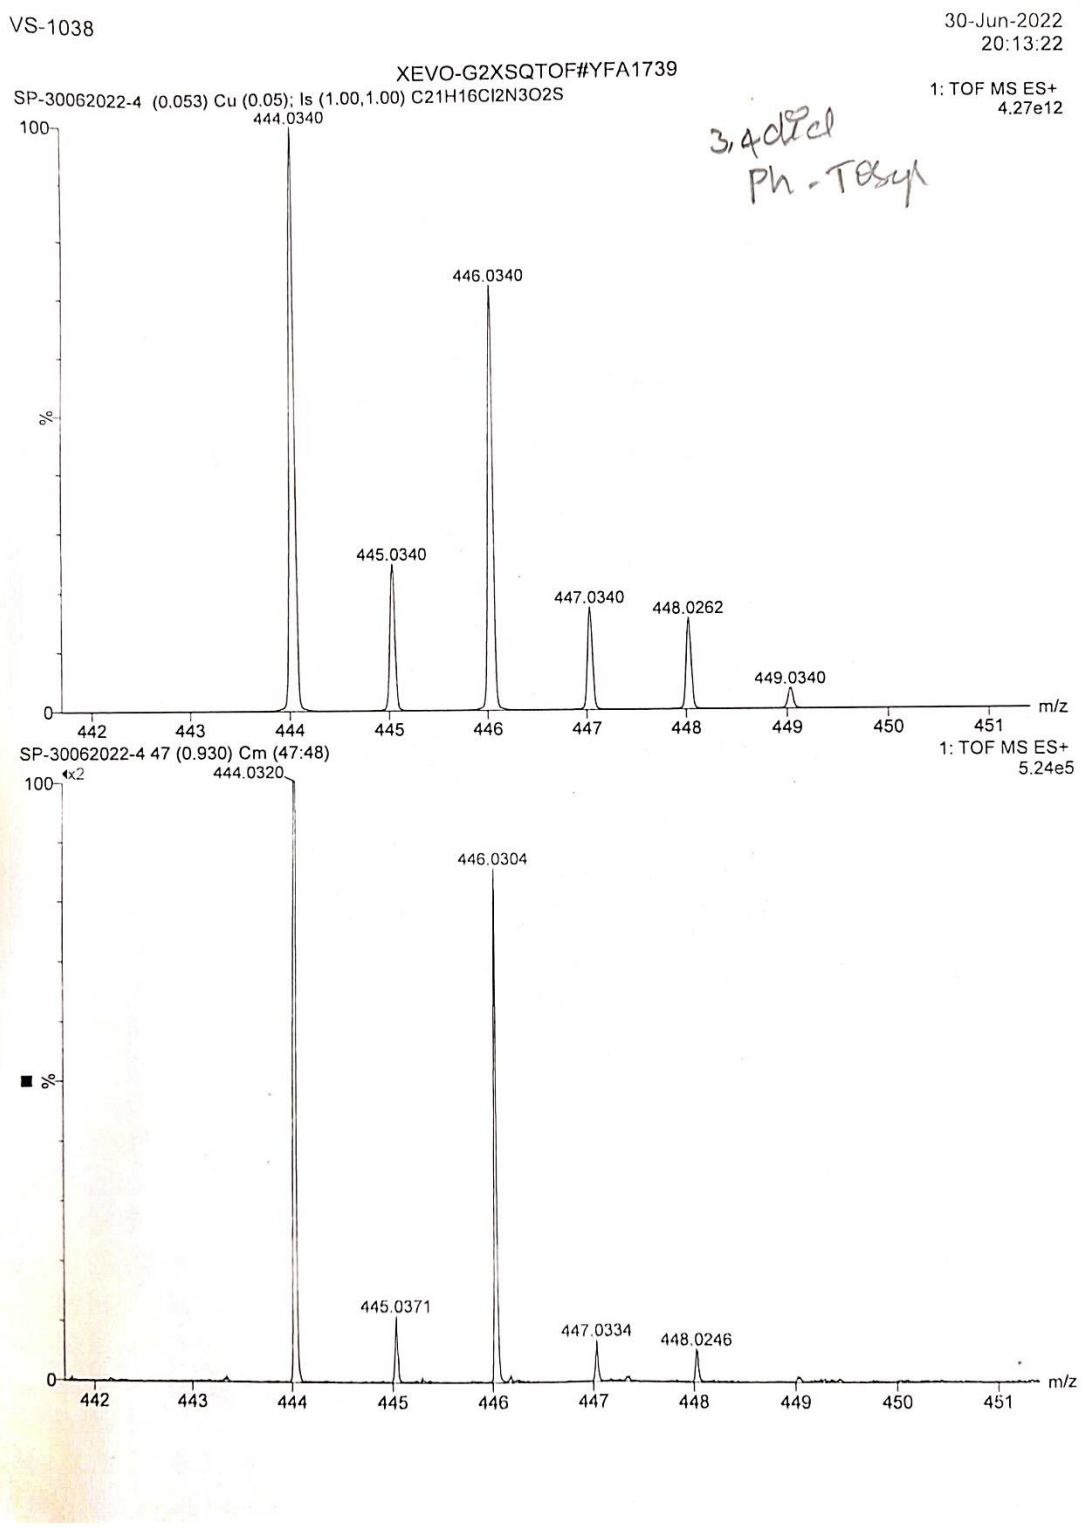



**N-(6,7-Dichloro-3-(o-tolyl)quinoxalin-2-yl)-4-methylbenzenesulfonamide (4r)**

PERU\_BS\_67

26-Oct-2022  
12:11:33

XEVO-G2XSQTOF#YFA1739

PERU\_26102022\_1 (0.053) Cu (0.05); Is (1.00,1.00) C<sub>22</sub>H<sub>18</sub>Cl<sub>2</sub>N<sub>3</sub>O<sub>2</sub>S

1: TOF MS ES+  
4.23e12

*34dial  
2me - o-Tolyl*

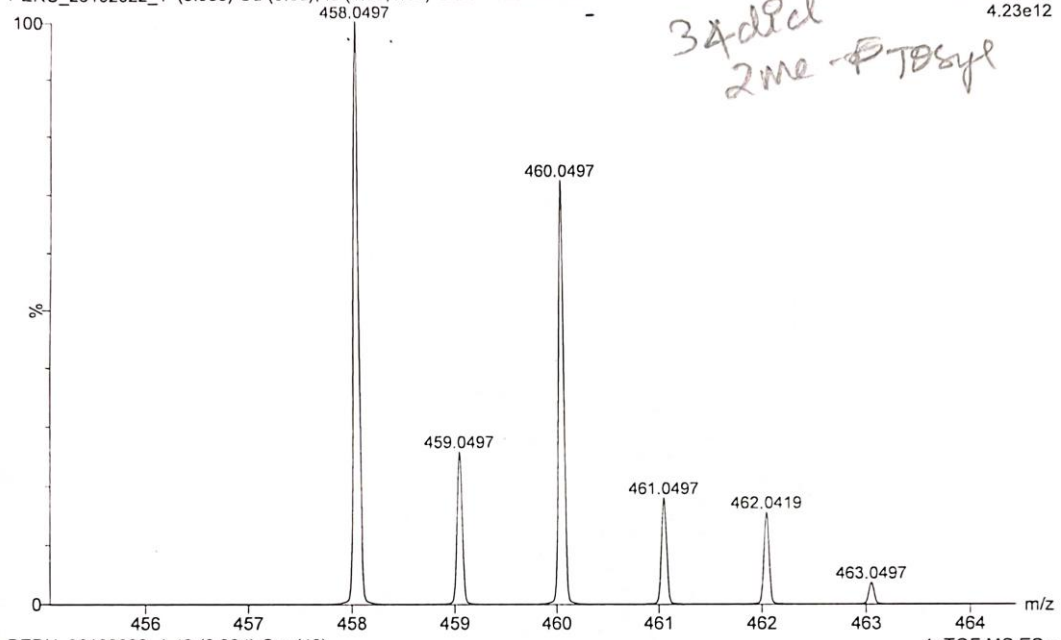

PERU\_26102022\_1 49 (0.984) Cm (49)

1: TOF MS ES+  
3.63e6

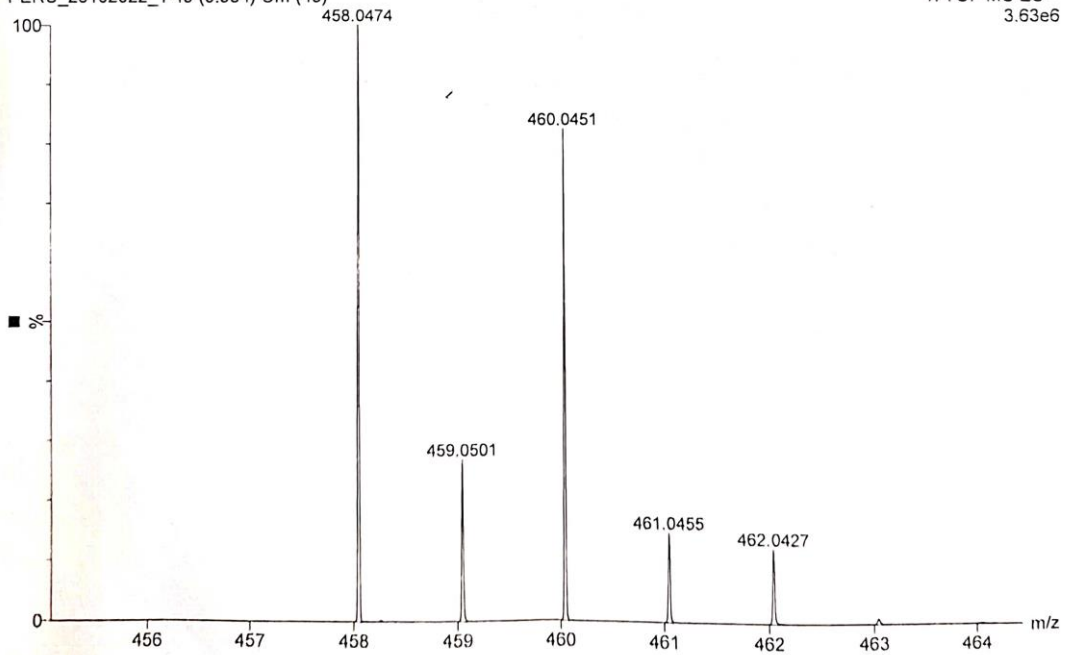

**N-(6,7-Dichloro-3-(p-tolyl)quinoxalin-2-yl)-4-methylbenzenesulfonamide (4s)**

PERU\_VS\_1064

22-Aug-2022  
14:52:28

XEVO-G2XSQTOF#YFA1739

PERU\_22082022\_1 (0.053) Cu (0.05); Is (1.00,1.00) C22H18Cl2N3O2S

1: TOF MS ES+  
4.23e12

*3,4-did,  
4me - TBSyl*

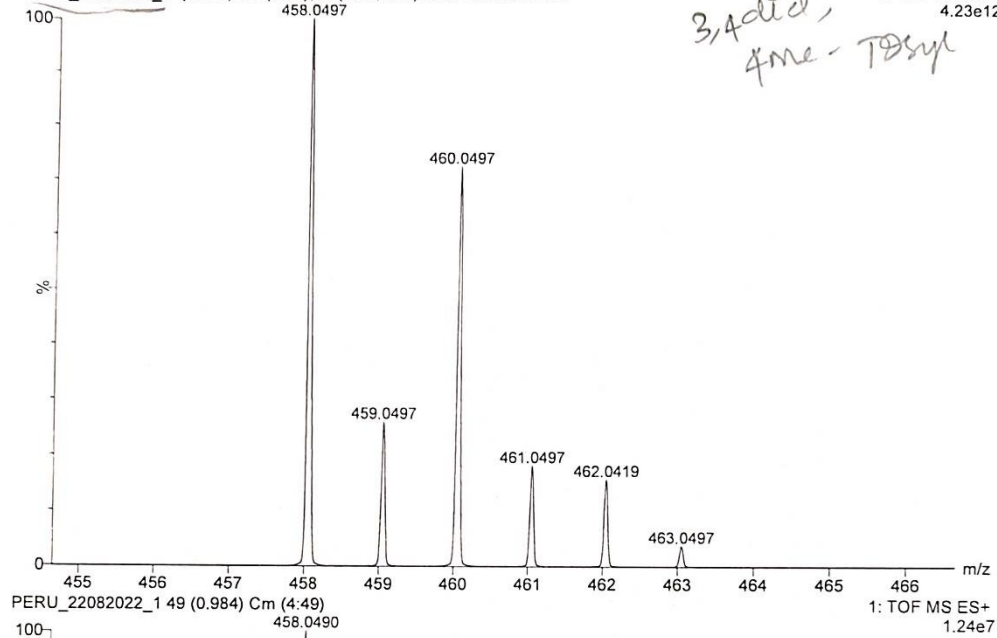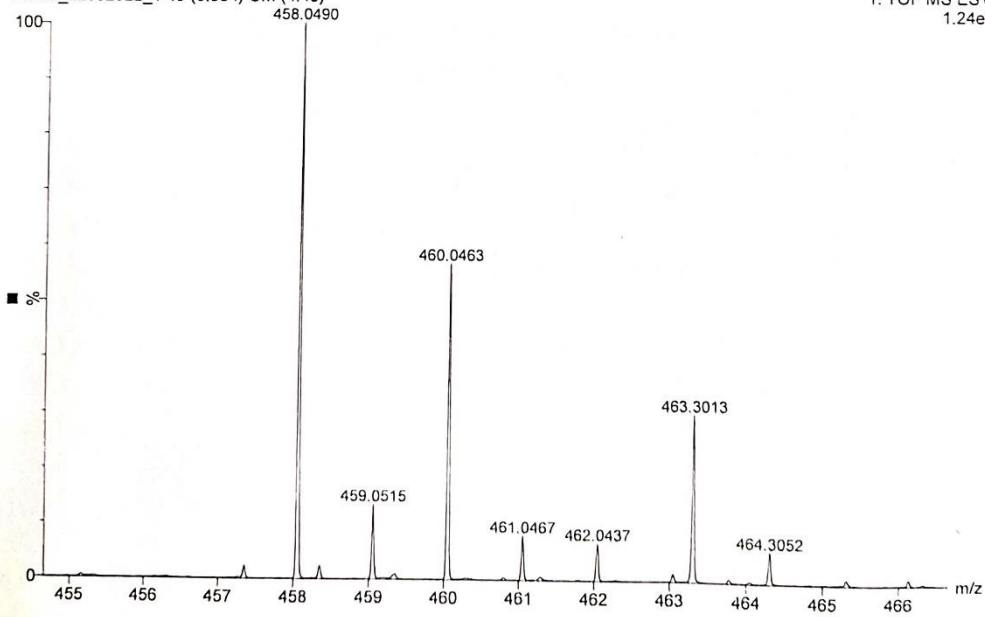

***N*-(3-(Benzo[*d*][1,3]dioxol-5-yl)quinoxalin-2-yl)-4-methylbenzenesulfonamide (4t)**

VS-963

06-Jun-2022  
22:29:39

XEVO-G2XSQTOF#YFA1739

SP\_06082022 8 (0.984) Cu (0.05); Is (1.00,1.00) C22H18N3O4S

1: TOF MS ES+  
7.33e12

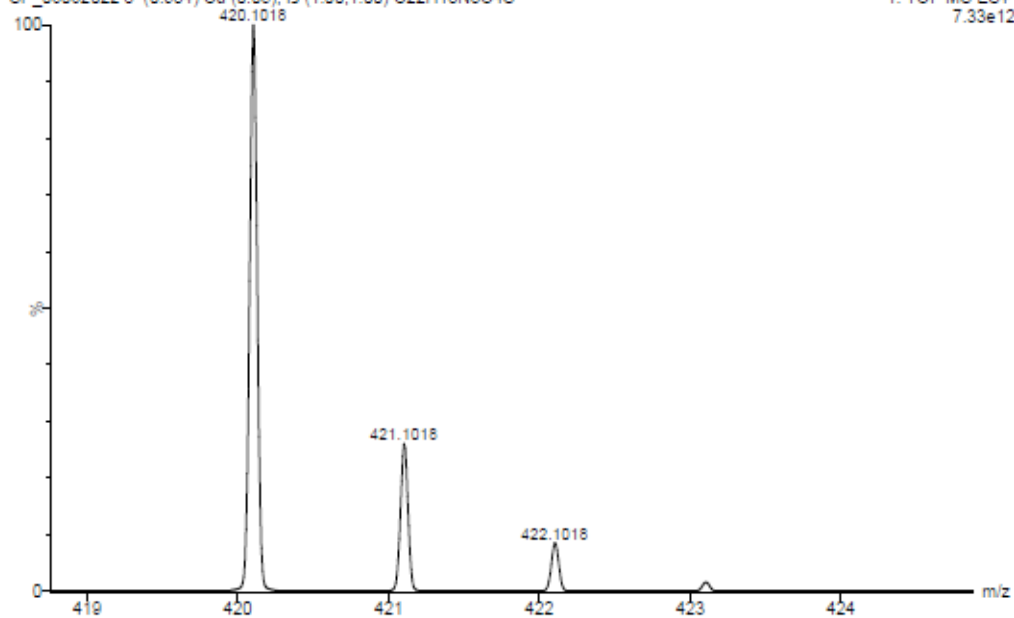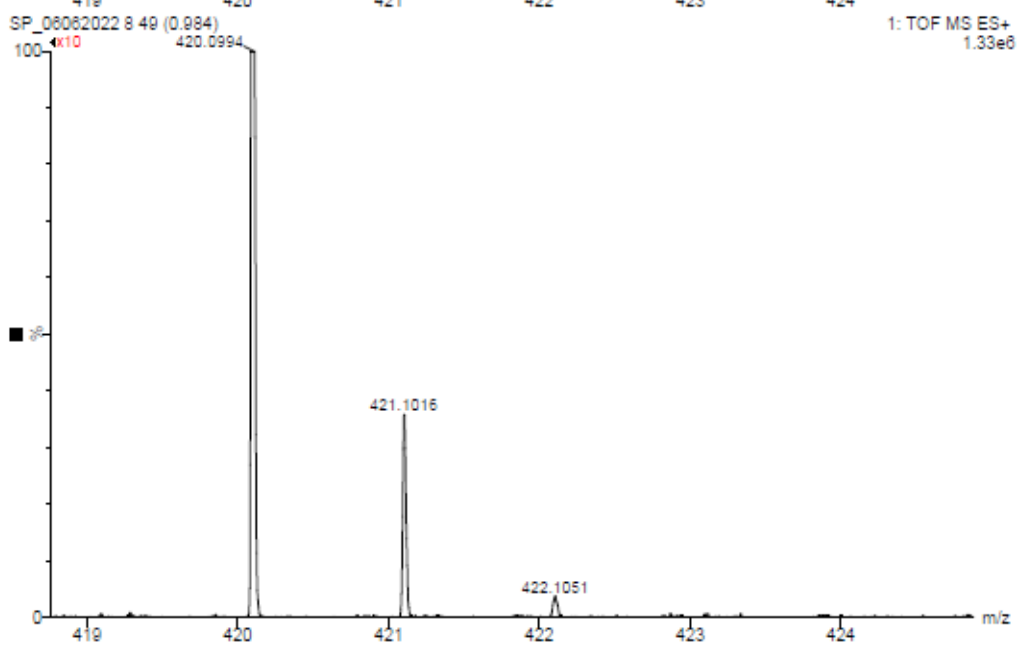

***N*-(3-(benzo[*d*][1,3]dioxol-5-yl)-6,7-dichloroquinoxalin-2-yl)-4-methylbenzenesulfonamide (4u)**

PERU\_VS\_1111

06-Dec-2022  
15:21:45

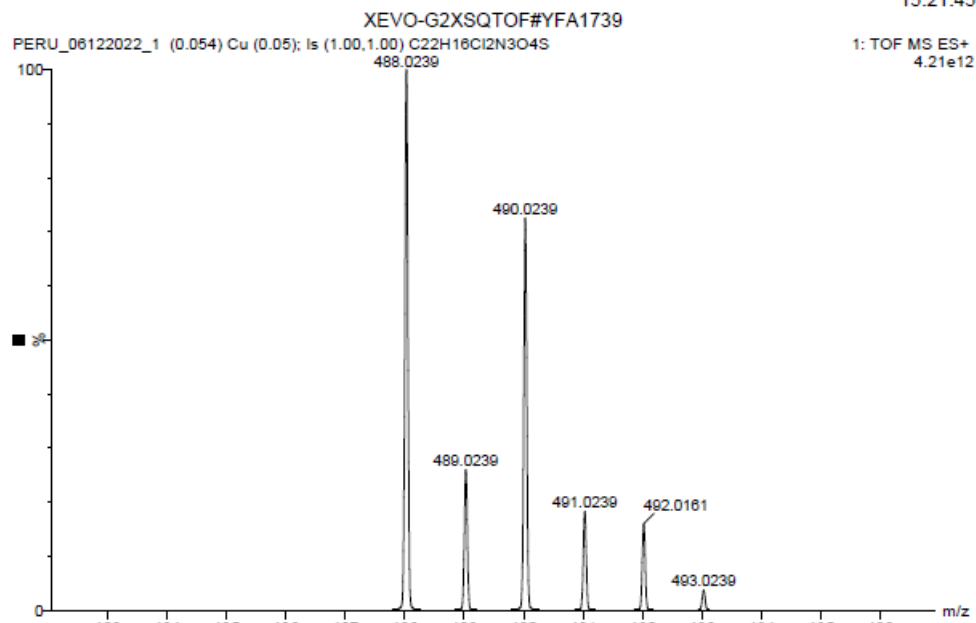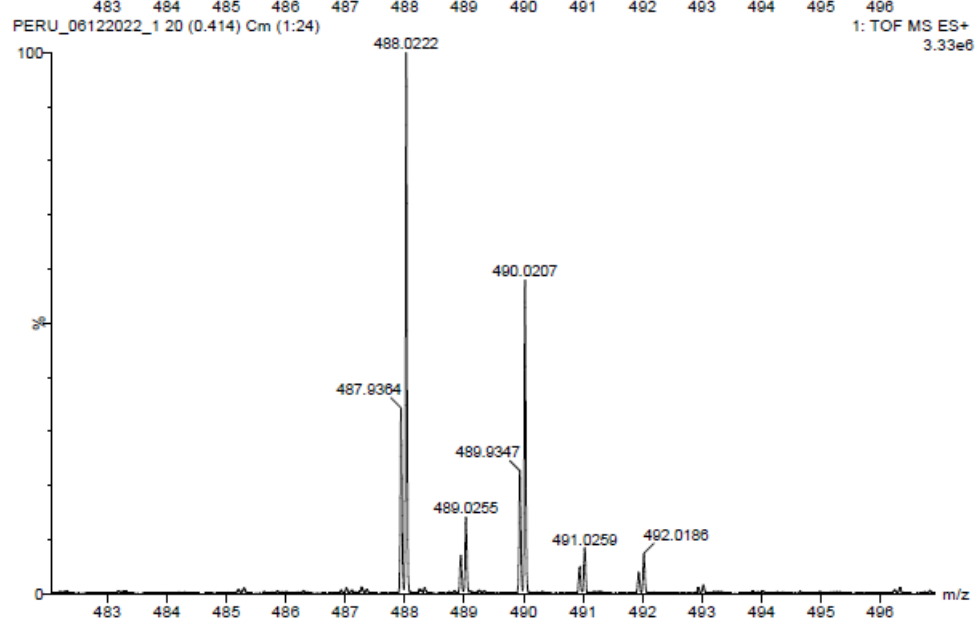

**4-Methyl-N-(3-(4-(trifluoromethyl)phenyl)quinoxalin-2-yl)benzenesulfonamide (4v)**

PERU\_VS\_979

04-Oct-2023  
16:11:20

XEVO-G2XSQTOF#NotSet

PERU\_04102023\_2 (0.054) Cu (0.05); Is (1.00,1.00) C22H17F3N3O2S

1: TOF MS ES+  
7.37e12

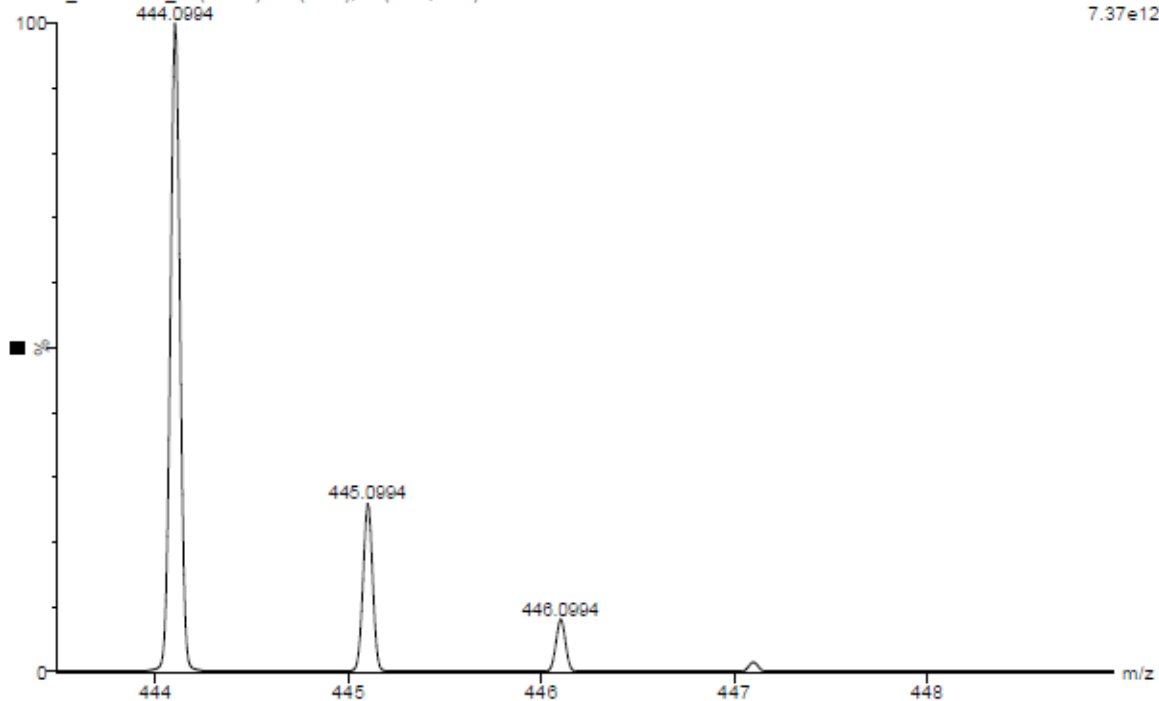

PERU\_04102023\_2 49 (0.984) Cm (49)

1: TOF MS ES+  
2.43e5

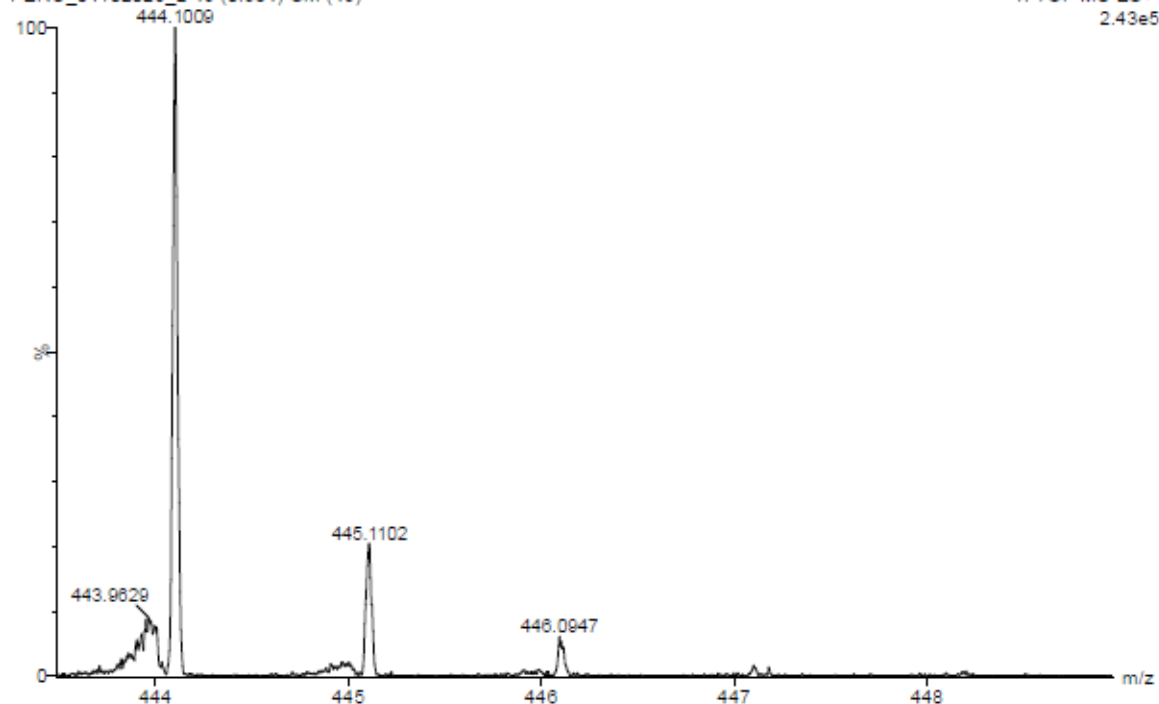

**4-Methyl-N-(3-(2,4,5-trifluorophenyl)quinoxalin-2-yl)benzenesulfonamide (4w)**

VS-1012

08-Dec-2023  
14:43:38

XEVO-G2XSQTOF#NOTSET

PERU\_08122023\_1 (0.034) Cu (0.05); Is (1.00, 1.00) C<sub>21</sub>H<sub>15</sub>F<sub>3</sub>O<sub>2</sub>S

1: TOF MS ES+  
7.45e12

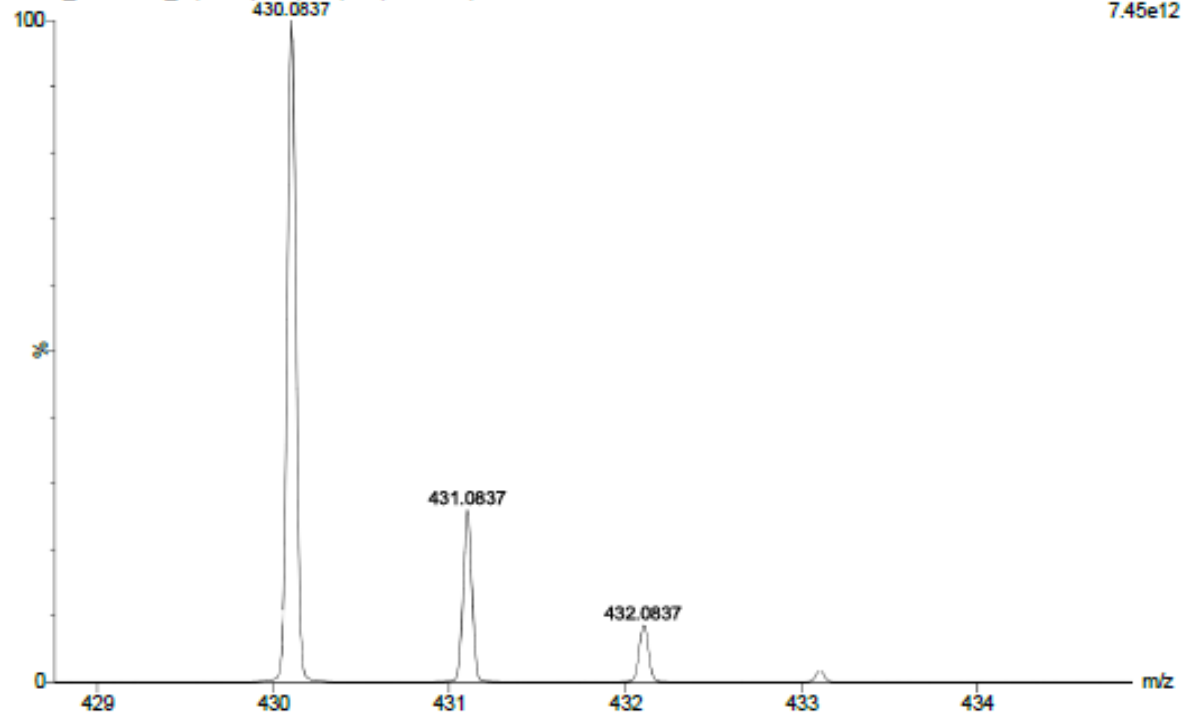

PERU\_08122023\_1 29 (0.507) Cm (25:34)

1: TOF MS ES+  
6.85e6

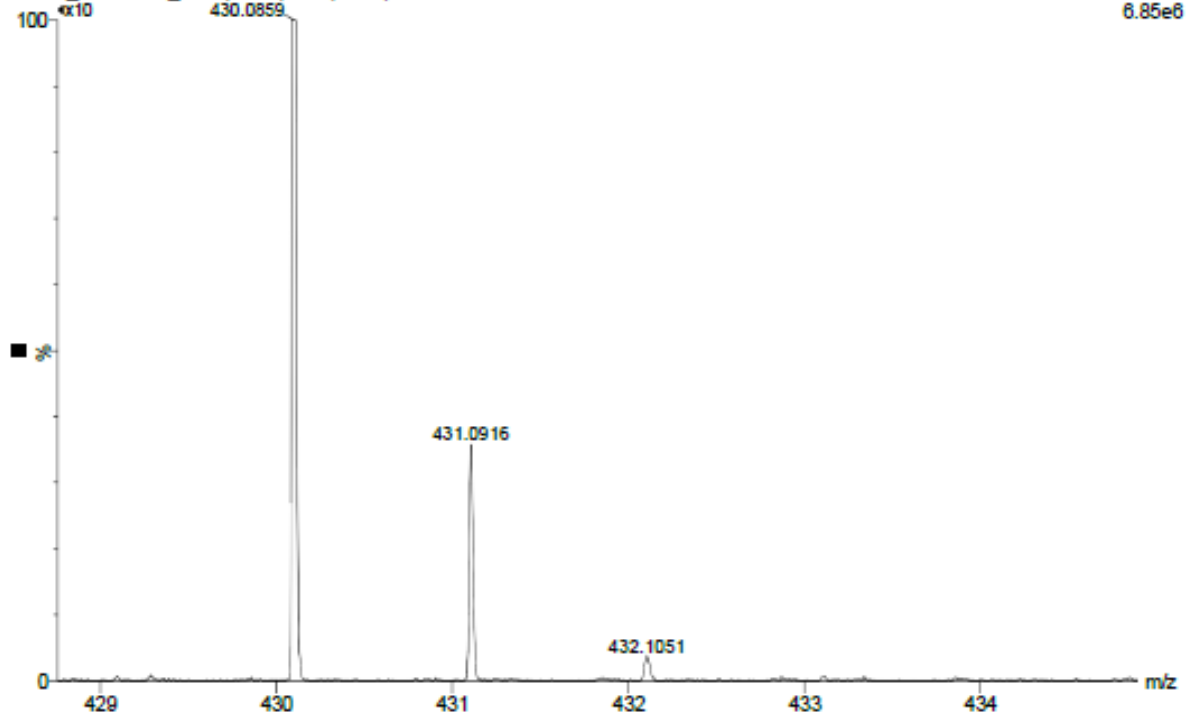

Supplement: d4ob00812j1.pdf [file d4ob00812j1.pdf]
